# Supplementary material for: Barriers and facilitators to implementation of non-medical independent prescribing in primary care in the UK: a qualitative systematic review
Source: PubMed Central journal article supplement — BMJ Open. 2022 Jun 8;12(6):e052227. doi: 10.1136/bmjopen-2021-052227 (PMC9185484; doi:10.1136/bmjopen-2021-052227), 2022-06-08
Supplement: bmjopen-2021-052227.draft_revisions.pdf [file bmjopen-2021-052227.draft_revisions.pdf]

# BMJ Open

BMJ Open is committed to open peer review. As part of this commitment we make the peer review history of every article we publish publicly available.

When an article is published we post the peer reviewers' comments and the authors' responses online. We also post the versions of the paper that were used during peer review. These are the versions that the peer review comments apply to.

The versions of the paper that follow are the versions that were submitted during the peer review process. They are not the versions of record or the final published versions. They should not be cited or distributed as the published version of this manuscript.

BMJ Open is an open access journal and the full, final, typeset and author-corrected version of record of the manuscript is available on our site with no access controls, subscription charges or pay-per-view fees (<http://bmjopen.bmj.com>).

If you have any questions on BMJ Open's open peer review process please email [info.bmjopen@bmj.com](mailto:info.bmjopen@bmj.com)

# BMJ Open

## Barriers and facilitators to implementation of non-medical independent prescribing in primary care: a qualitative systematic review.

|                               |                                                                                                                                                                                                                                                                                                                             |
|-------------------------------|-----------------------------------------------------------------------------------------------------------------------------------------------------------------------------------------------------------------------------------------------------------------------------------------------------------------------------|
| Journal:                      | <i>BMJ Open</i>                                                                                                                                                                                                                                                                                                             |
| Manuscript ID                 | bmjopen-2021-052227                                                                                                                                                                                                                                                                                                         |
| Article Type:                 | Original research                                                                                                                                                                                                                                                                                                           |
| Date Submitted by the Author: | 12-Apr-2021                                                                                                                                                                                                                                                                                                                 |
| Complete List of Authors:     | Edwards, Judith; University of Surrey Faculty of Health and Medical Sciences, School of Health Sciences<br>Coward, Melaine; University of Surrey Faculty of Health and Medical Sciences, School of Health Sciences<br>Carey, Nicola; University of Surrey Faculty of Health and Medical Sciences, School of Health Sciences |
| Keywords:                     | PRIMARY CARE, Health policy < HEALTH SERVICES ADMINISTRATION & MANAGEMENT, Organisational development < HEALTH SERVICES ADMINISTRATION & MANAGEMENT                                                                                                                                                                         |
|                               |                                                                                                                                                                                                                                                                                                                             |

SCHOLARONE™  
Manuscripts

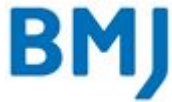

I, the Submitting Author has the right to grant and does grant on behalf of all authors of the Work (as defined in the below author licence), an exclusive licence and/or a non-exclusive licence for contributions from authors who are: i) UK Crown employees; ii) where BMJ has agreed a CC-BY licence shall apply, and/or iii) in accordance with the terms applicable for US Federal Government officers or employees acting as part of their official duties; on a worldwide, perpetual, irrevocable, royalty-free basis to BMJ Publishing Group Ltd ("BMJ") its licensees and where the relevant Journal is co-owned by BMJ to the co-owners of the Journal, to publish the Work in this journal and any other BMJ products and to exploit all rights, as set out in our [licence](#).

The Submitting Author accepts and understands that any supply made under these terms is made by BMJ to the Submitting Author unless you are acting as an employee on behalf of your employer or a postgraduate student of an affiliated institution which is paying any applicable article publishing charge ("APC") for Open Access articles. Where the Submitting Author wishes to make the Work available on an Open Access basis (and intends to pay the relevant APC), the terms of reuse of such Open Access shall be governed by a Creative Commons licence – details of these licences and which [Creative Commons](#) licence will apply to this Work are set out in our licence referred to above.

Other than as permitted in any relevant BMJ Author's Self Archiving Policies, I confirm this Work has not been accepted for publication elsewhere, is not being considered for publication elsewhere and does not duplicate material already published. I confirm all authors consent to publication of this Work and authorise the granting of this licence.

BMJOpen\_Main\_Manuscript\_12.04.21

1  
2  
3 **Title**

4  
5 Barriers and facilitators to implementation of non-medical independent prescribing in primary  
6 care: a qualitative systematic review.  
7

8  
9 **Corresponding author**

10 Judith Edwards

11  
12 University of Surrey Faculty of Health and Medical Sciences, School of Health Sciences  
13 Guildford, Surrey, United Kingdom, GU2 7YH.

14  
15 j.a.edwards@surrey.ac.uk

16  
17  
18 <https://orcid.org/0000-0002-6531-1315>  
19

20  
21 **Co-authors**

22 Professor Melaine Coward

23  
24 University of Surrey Faculty of Health and Medical Sciences, School of Health Sciences  
25 Guildford, Surrey, United Kingdom, GU2 7YH.

26  
27 m.coward@surrey.ac.uk  
28

29  
30 Dr Nicola Carey

31  
32 University of Surrey Faculty of Health and Medical Sciences, School of Health Sciences  
33 Guildford, Surrey, United Kingdom, GU2 7YH.

34  
35 n.carey@surrey.ac.uk  
36

37  
38 **Word count: 5331**  
39  
40  
41  
42  
43  
44  
45  
46  
47  
48  
49  
50  
51  
52  
53  
54  
55  
56  
57  
58  
59  
60

BMJOpen\_Main\_Manuscript\_12.04.21

## Abstract

### Objectives

In order to support global workforce deficits and the rising demand for medicines, advanced practice including independent prescribing by nurses, pharmacists and allied health professionals is increasingly integral to service delivery. To guide future development and planning strategies in primary care it is important to understand factors influencing implementation. The objective of this qualitative systematic review was to identify barriers and facilitators to non-medical independent prescribing in UK primary care and explore their influence on adoption, implementation and sustainability.

### Methods

Informed by Diffusion of Innovations and the Consolidated Framework for Implementation Research a systematic review of UK qualitative studies (2010-2020) using a thematic meta-synthesis approach was conducted to explore stakeholders' views on independent prescribing in primary care.

### Results

Twenty-two articles fulfilled selection criteria and were of moderate to good quality. Themes illuminated core stages in implementation including 1) initial organisational preparation, 2) selection and support of practitioners during training, 3) transition of prescribing into practice and 4) long-term development and sustainability. A need for greater managerial support to ameliorate barriers across the entire implementation trajectory was identified.

### Conclusions

In order to address global deficits, there is increasing need for the healthcare workforce to optimise use of independent prescribing capability. However, a more coordinated approach to overcome barriers identified in the four key stages of implementation is required. Given predicted workforce shortfalls in the UK and around the world this will become increasingly important.

## Article Summary

### Strengths and limitations of this study

- This is first qualitative systematic review using a meta-synthesis approach to explore barriers and facilitators to independent prescribing by nurses, pharmacists and allied health professionals in UK primary care.
- Use of Diffusion of Innovation theory and the Consolidated Framework for Implementation Research supported identification of barriers and facilitators at organisational, team and individual practitioner level.

BMJOpen\_Main\_Manuscript\_12.04.21

- Four key stages of implementation including 1) initial organisational preparation, 2) selection and support of practitioners during training, 3) transition of prescribing into practice and 4) long-term development and sustainability were identified.
- As the focus was on primary care barriers and facilitators in acute care and other care settings were excluded.
- In order to develop in-depth understanding of barriers and facilitators at contextual level, quantitative and grey literature was excluded.

### Key words

Implementation, barriers, facilitators, non-medical prescribing, independent prescribing, primary care, meta-synthesis

### Introduction

Equitable access primary care improves health outcomes, lowers costs and enhances patient experience(1, 2). Global workforce deficits(3-5) and the rising prevalence of long term conditions,(6, 7) frailty,(8) multimorbidity(9-11) and long Covid-19(12) are severely threatening primary care sustainability(12-15). Medicines use in global priorities including diabetes and cardiovascular diseases are increasing, with worldwide drug therapy days rising to 1.8 trillion and an average of 234 days per person(16). With one in four adults in primary care taking five or more medicines daily(17), the workforce implications for meeting prescribing needs are profound.

To address workforce and service sustainability, UK primary care reconfiguration(18) has amalgamated GP practices into primary care networks (PCN), covering populations of 30-50,000(19). Pooling resources to achieve government targets(20), PCN will offer additional hours within broader service options(21). By 2024 an additional 20,000 non-medical staff including advanced/specialist clinical pharmacists, dieticians, paramedic and physiotherapy first-contact practitioners will bolster PCN, bringing workforce skill diversity(22). Integral to advanced practice(23), prescribing capability is likely to be important in this workforce for addressing prescribing and medicines optimisation needs(24-26).

There are over 90,000 UK nurses, pharmacists, optometrists, radiographers, physiotherapists, podiatrists and paramedics(27) who under serial legislative changes(28-31) and with accredited training qualification(32-34) are authorised to prescribe using supplementary and/or independent forms. The former requires initial diagnosis by a doctor and a clinical management plan pre-stipulating medicines that can be prescribed,(35) whilst independent prescribing (IP) permits autonomous diagnostic responsibility and prescribing

BMJOpen\_Main\_Manuscript\_12.04.21

1  
2  
3 without medical input(28). Supplementary prescribing retaining medical dependence is  
4 unworkable in many UK non-doctor led community services,(36, 37) and has largely been  
5 superseded by IP(38-40).  
6  
7

8  
9 IP increases practitioner autonomy and expertise,(24, 41-43) enhances clinical outcomes  
10 compared to doctor-led care(24) and results in high service-user satisfaction(44). Despite  
11 these benefits UK adoption rates vary,(45, 46) with training course drop-out,(42) delayed  
12 prescribing onset(47, 48) and role underuse reported(49-52). Difficulties with implementation  
13 of IP are frequently cited(39, 42, 47, 53-55). Several UK(56, 57) and international(58-61)  
14 systematic and literature reviews,(62, 63) have focused on implementation barriers and/or  
15 facilitators. However, these have been profession-specific,(58-61, 63) have addressed  
16 heterogenous care settings,(56, 57, 59, 63) or have included international models with  
17 varying legislative/jurisdictional levels of prescribing autonomy(58-61) and none have  
18 synthesised qualitative studies to better understand challenges of implementing IP within UK  
19 primary care. Given demand for IP training has increased following PCN introduction(64, 65)  
20 identifying and understanding the challenges of implementation is ever pressing.  
21  
22  
23  
24  
25  
26  
27  
28

## 29 **Aim**

30  
31 This qualitative meta-synthesis aimed to identify barriers and facilitators to NMIP in UK  
32 primary care and explore their influence on adoption, implementation and sustainability.  
33  
34

## 35 **Theoretical perspective**

36  
37 Rogers' Diffusion of Innovations theory(66, 67) and the Consolidated Framework for  
38 Implementation Research(68, 69) were theoretical anchors for interpretive synthesis(70, 71).  
39 Diffusion of Innovations focuses on adoption, explaining how innovation attributes,(72-74)  
40 adopter characteristics(73) and implementing social systems facilitate innovation diffusion. It  
41 emphasises adopter traits and implementation self-efficacy within wider socio-political  
42 contexts and has resonance for the complex skill of prescribing(75, 76) which has been  
43 under historical medical monopoly(77). The Consolidated Framework for Implementation  
44 Research draws on Rogers' theory(68, 69, 78) and provides a framework of 39 constructs  
45 representing contextual factors(79) at organisational, provider and process levels most likely  
46 to influence implementation(80-82).  
47  
48  
49  
50  
51  
52  
53

## 54 **Methods**

55  
56 This qualitative meta-synthesis is reported following enhancing transparency in reporting the  
57 synthesis of qualitative research (ENTREQ) guidelines(83). Qualitative review(84, 85) was  
58  
59  
60

BMJOpen\_Main\_Manuscript\_12.04.21

adopted to synthesise evidence that provides in-depth, contextual understanding of IP implementation, from perspectives of stakeholders key to its delivery(86). Meta-synthesis, theoretically and epistemologically agnostic(87), is a suitable method for identifying and interpreting barriers and facilitators(87, 88). The review was registered in PROSPERO (CRD42019124400).

### Search strategy

A systematic search of UK primary and community IP studies was undertaken in June 2020, using search terms developed according to the Sample, Phenomenon of Interest, Design, Evaluation, Research Type (SPIDER) tool(89). These were tested based on truncations of words related to prescribing, nurses, pharmacists, optometrists, and relevant professional groups, primary and community care. Wild card and Boolean Search Operators were used. To avoid specificity and sensitivity limitations,(90, 91) qualitative search terms were not included and all citations were screened for qualitative methodology. Search strings (see supplementary file 1 examples) were adapted for different electronic databases including EBSCO (MEDLINE, CINAHL), OVID (EMBASE) and ProQuest (British Nursing Index, Nursing & Allied Health) and Web of Science. Publications were searched from January 2010 to June 2020 to ensure findings contemporary to policy influencing UK primary care commissioning and re-configuration,(92-94) and extended to December 2020 by re-running search strings in January 2021. Other limits applied to ensure relevance are shown in Table 1. Retrieved citations were downloaded to EndNote V.X9 and duplicates removed.

**Table 1 Inclusion and exclusion criteria**

| Inclusion Criteria                                                                                                                | Exclusion Criteria                                                                           |
|-----------------------------------------------------------------------------------------------------------------------------------|----------------------------------------------------------------------------------------------|
| ▶ Primary research                                                                                                                | ▶ Literature reviews, meta-analyses or meta-synthesis                                        |
| ▶ Studies employing participatory and/or non-participatory data collection methods within any qualitative or mixed methods design | ▶ Quantitative studies                                                                       |
| ▶ Studies addressing NMIP by legislated non-doctor health care professionals                                                      | ▶ Studies addressing supplementary and/or collaborative models of prescribing                |
| ▶ Studies addressing NMIP in primary/ community care                                                                              | ▶ Studies addressing NMIP in secondary care and/or mixed primary and secondary care settings |
| ▶ Studies presenting empirical evidence of barriers and/or facilitators to NMIP implementation                                    |                                                                                              |
| ▶ Studies addressing non-context specific generic educational programmes for NMIP                                                 |                                                                                              |



BMJOpen\_Main\_Manuscript\_12.04.21

|                                                                                                                    |                                 |
|--------------------------------------------------------------------------------------------------------------------|---------------------------------|
| ▶ Peer reviewed, full text articles published between 01 January 2010 and 31 December 2020 in the English language | ▶ Abstracts, conference reports |
| ▶ Studies undertaken in the UK                                                                                     | ▶ International studies         |

## Screening and eligibility

UK studies meeting Table 1 criteria were included. Two reviewers (JE, NC) independently assessed titles and abstracts for eligibility using a three-step screening process. Titles were initially reviewed to exclude non-IP literature, abstracts were screened, and full relevant texts were sought. Reasons for screening exclusion are shown in Figure 1. Reference list hand searching supplemented database searching.

**Figure 1 goes here**

**Figure 1.** Flow diagram of selection process and search results (adapted from Liberati et al., 2009)(95).

## Quality assessment

Quality appraisal was undertaken using the Quality Assessment Tool for Studies with Diverse Designs (QATSDD), which accommodates qualitative and mixed method designs and includes trustworthiness constructs(96). A graded scoring system (1=very slightly, 2=moderately, 3=complete) for each criterion allows for less ambiguity in distinguishing strong or weak criteria coverage. Possible QATSDD scores range from 0-42 and 0-48 for qualitative and mixed method studies respectively(96). To aid interpretation, scores were converted to percentages and classified as low (<50%: serious methodological defects with poor scientific value), medium (50-70%: moderate methodological defects without serious scientific detriment) or high (>70%: robust scientific methods meeting most benchmarks) quality. In order to expose methodological weaknesses in the literature(97, 98). studies were not excluded on the basis of quality assessment(84, 99).

## Data extraction and assessment of relevance

Following best practice(100) study data were extracted by one author (JE) to a bespoke table adapted from recommended templates(101). This collated contextual and methodological information and was piloted on 5 index studies to ensure consistency and

BMJOpen\_Main\_Manuscript\_12.04.21

usability. To help contextualise barriers and facilitators, main findings were included. Data extraction was recursive and involved repeated review/update between ensuing analysis stages(102).

### Data analysis and synthesis

Data analysis followed a four stage, iterative process described by Thomas and Harden (2008) (Table 2). Qualitative “data” referred to participant quotations, (sub)themes, explanations, hypotheses or new theory, observational excerpts and author interpretations(103). Barriers were defined as “any obstacle (material or immaterial) impeding adoption, implementation and/or sustainability of IP”(104, 105) and facilitators were defined as “any obstacle (material or immaterial) enhancing adoption, implementation and/or sustainability of IP”(104, 105).

**Table 2 Stages of analysis**

|                                                                                                                         |
|-------------------------------------------------------------------------------------------------------------------------|
| ▶ Stage 1 - In-depth reading and familiarisation with individual papers, data extraction                                |
| ▶ Stage 2 - Inductive line-by-line coding of highest quality, index papers (n=5) by two independent reviewers (JE, NC). |
| ▶ Stage 3 - Codes agreed, grouped into descriptive themes using NVivo <sup>(106)</sup> ; codebook applied to all papers |
| ▶ Stage 4 - Descriptive themes organised into analytical themes, matrix charted with corresponding quotes               |

### Rigour within the analytical process

To ensure analytic rigour, two independent reviewers (JE, NC) initially performed inductive line-by-line data coding from 5 highest quality index papers (stage 2). Each reviewer produced sets of open data codes which were compared and discussed. If different codes and/or different interpretations were assigned to a concept, these were discussed and revised. Data codes were subsequently grouped into descriptive themes, creating a codebook for application to all papers (stage 3). To identify possible contradictory cases and clarify thematic commonalities within studies,(107) a matrix of participant quotes was charted to constituent themes(108).

### Patient and public involvement

As part of a PhD exploring paramedic IP(109), a University service user/carers group was consulted about paramedic working and prescribing in primary care, the approach of preliminary systematic review and data collection tool design. Users ratified the concept and

BMJOpen\_Main\_Manuscript\_12.04.21

potential benefits of paramedic IP to primary care and highlighted the importance of stakeholder perspective.

## Results

### Search outcome

Outcomes of database searches are reported in the Preferred Reporting Items for Systematic Reviews and Meta-Analyses flow chart in figure 1. Twenty-two papers representing 19 unique datasets were included and underwent quality appraisal(110-132).

### Study characteristics

Studies, summarised in Table 3 and detailed in on-line Supplementary file 2, were qualitative,(110, 113, 115, 117-122, 124, 126, 127, 129-132) mixed method (111, 112, 114, 116, 123, 124) and survey(125) designs. The majority addressed nurse IP,(110-112, 114-116, 118-122, 125, 128, 130, 132) with fewer studies including pharmacists(113, 117, 124, 126, 129, 131) or other professions(123). Ten studies conducted pre-2011 reflected an historical primary care context and nursing workforce in early national IP adoption,(111-113, 115, 119-121, 129-131) with recent pharmacist IP roles suggesting more contemporary, multi-disciplinary environments(124, 126). IP was researched in general practice,(118-120, 125) community(114, 121, 122, 124, 126, 128, 132) or mixed settings(110-113, 115-117, 123, 129, 130). Participants included prescribers,(113, 114, 116-119, 121, 122, 128, 129, 131, 132) non-prescribers,(123, 125) students and educational staff,(110-112) service-users(115, 116, 120, 130) and multi-disciplinary team members(124, 126, 131, 132). Studies explored training,(110-112) IP job roles,(113, 118, 119, 121, 128, 131) patient acceptance,(115, 120, 130) prescribing/medicines optimisation practices,(114, 116, 122, 123, 132) implementation feasibility(124) and barriers and/or facilitators(117, 125, 126, 129).

BMJOpen\_Main\_Manuscript\_12.04.21

Table 3. Study characteristics (n=22)

| Author(s), year                     | Country                      | Study focus                                       | Participants                                    | Setting(s)                                                                | QATSDD score | Quality rating |
|-------------------------------------|------------------------------|---------------------------------------------------|-------------------------------------------------|---------------------------------------------------------------------------|--------------|----------------|
| <b>Afseth &amp; Paterson (2017)</b> | Scotland                     | Views on training                                 | 6 student nurses<br>6 DMPs                      | Higher education institute                                                | 67%          | Moderate       |
| <b>Boreham et al (2013)</b>         | Scotland                     | Views on training                                 | 87 student nurses<br>10 programme leads         | Higher education institute                                                | 67%          | Moderate       |
| <b>Bowskill et al (2014)</b>        | England                      | Views on training                                 | 6 student nurses<br>3 mentors                   | Higher education institute                                                | 60%          | Moderate       |
| <b>Brodie et al (2014)</b>          | Scotland                     | Views on prescribing role                         | 4 nurse IPs<br>4 pharmacist IPs                 | General practice<br>Community                                             | 38%          | Low            |
| <b>Cole &amp; Gillett (2015)</b>    | England                      | Prescribing practices                             | 6 clinical nurse specialist IPs                 | Community palliative care                                                 | 29%          | Low            |
| <b>Courtenay et al (2010)</b>       | England                      | Patient views on nurse prescribing                | 41 patients                                     | General practice<br>Community clinic                                      | 50%          | Moderate       |
| <b>Courtenay et al (2017)</b>       | England<br>Scotland<br>Wales | Patient views on nurse and pharmacist prescribing | 16 nurse IPs<br>1 pharmacist IPs<br>22 patients | General practice<br>Community clinic                                      | 67%          | Moderate       |
| <b>Courtenay et al (2019)</b>       | Wales                        | Factors influencing antibiotic prescribing        | 17 nurse IPs<br>4 pharmacist IPs                | General practice<br>Out-of-hours<br>Unscheduled care<br>Intermediate care | 78%          | High           |
| <b>Cousins &amp; Donnell (2012)</b> | England                      | Views on prescribing role                         | 6 nurse practitioner IPs                        | General practice                                                          | 59%          | Moderate       |
| <b>Daughtry &amp; Hayter (2010)</b> | England                      | Experiences of prescribing                        | 8 practice nurse IPs                            | General practice                                                          | 36%          | Low            |
| <b>Dhalivaal (2011)</b>             | England                      | Patient views on nurse prescribing                | 15 patients                                     | General practice                                                          | 43%          | Low            |
| <b>Downer &amp; Shepherd (2010)</b> | Scotland                     | Views on prescribing role                         | 8 district nurse IPs                            | Community                                                                 | 48%          | Low            |
| <b>Herklots et al (2015)</b>        | England                      | Experiences of prescribing                        | 7 community matron IPs                          | Community                                                                 | 43%          | Low            |
| <b>Holden et al (2019)</b>          | England                      | Medicines optimisation practices                  | 21 physiotherapists                             | Unspecified NHS and non-NHS settings                                      | 75%          | High           |

BMJOpen\_Main\_Manuscript\_12.04.21

|                                        |                                         |                                            |                                                                                                                     |                                                                  |     |          |
|----------------------------------------|-----------------------------------------|--------------------------------------------|---------------------------------------------------------------------------------------------------------------------|------------------------------------------------------------------|-----|----------|
| <b>Inch et al (2019)</b>               | England                                 | Feasibility of implementation              | 2 pharmacist non-IPs<br>4 pharmacist IPs<br>6 GPs<br>16 care home staff<br>2 patients<br>3 relatives<br>1 dietician | Elderly residential care                                         | 54% | Moderate |
| <b>Kelly et al (2010)</b>              | England                                 | Barriers to adoption                       | 31 practice nurse IPs<br>120 nurse non-IPs                                                                          | General practice                                                 | 33% | Low      |
| <b>Lane et al (2020)</b>               | England<br>Scotland<br>Northern Ireland | Barriers and facilitators to prescribing   | 27 pharmacist non-IPs<br>29 GPs<br>12 care home staff<br>7 patients<br>7 relatives                                  | Elderly residential care                                         | 78% | High     |
| <b>Latham &amp; Nyatanga (2018a,b)</b> | England                                 | Views on prescribing role                  | 6 nurse IPs                                                                                                         | Community palliative care                                        | 71% | High     |
| <b>Maddox et al., (2016)</b>           | England                                 | Barriers and facilitators to prescribing   | 25 nurse IPs<br>5 pharmacist IPs                                                                                    | GP practices<br>Community<br>Nursing homes<br>Community pharmacy | 71% | High     |
| <b>Stenner et al (2011)</b>            | England                                 | Patient views on nurse prescribing         | 41 patients                                                                                                         | General practice<br>Community clinics                            | 55% | Moderate |
| <b>Weiss et al (2016)</b>              | England<br>Wales                        | Views on prescribing role                  | 7 nurse IPs<br>7 pharmacist IPs<br>7 GPs                                                                            | General practice                                                 | 52% | Moderate |
| <b>Williams et al (2018)</b>           | England                                 | Factors influencing antibiotic prescribing | 15 GPs<br>15 nurse IPs                                                                                              | Out-of-hours                                                     | 76% | High     |

DMPs – designated medical practitioners, GPs – general practitioners, IPs – independent prescribers.

BMJOpen\_Main\_Manuscript\_12.04.21

### **Implementation and identification of barriers and/or facilitators**

Studies were undertaken in exploration,(123, 125, 126) adoption,(124) and post-implementation phases(110-122, 127-130, 132) of IP. None were sustainability focused. Five studies had primary aims of identifying barriers and/or facilitators(117, 125, 126, 129, 132), and 4 reported findings as factors influencing NMIP(113, 121, 123, 128). Synthesis identified barriers and/or facilitators within the remaining 13 studies(110-112, 114-116, 118-120, 122, 124, 130, 131). Earlier research centred on prescribers or service-users(112-115, 118-123, 125, 128-130) with more recent studies adopting wider organisational perspectives(110, 111, 124, 126, 131, 132) and/or featuring implementation,(117, 126) psycho-social(131) and behaviour change theory(117).

### **Relevance of studies to the review**

Studies with highest relevance to review questions covered multiple primary care contexts,(117, 126, 129) included mixed stakeholder groups,(124, 126, 131) addressed specialist/non-specialist NMIP(117, 129) and targeted barriers and/or facilitators within aims/objectives(117, 125, 126, 129). Other studies based on the relative representation of the latter, as shown in Table 3 were indirectly or partially relevant to review questions.

### **Methodological quality**

Full methodological quality assessment details are provided in on-line supplementary file 3 (see Table 3 for summary). Six studies were high quality,(117, 123, 126, 128, 129, 132) 9 were moderate quality(110-112, 115, 116, 118, 124, 130, 131) and 7 were low quality(113, 114, 119-122, 125). High quality studies adhered more closely to technical aspects of qualitative(117, 126, 128, 129, 132) or mixed methods research,(123) had larger samples sizes,(117, 123, 126, 129, 132) explored perspectives from different professional/non-professional groups,(117, 126, 129, 132) provided richer contextual descriptions(117, 126, 128, 129, 132) and/or used implementation theory(117, 126). Barriers and/or facilitators were explored in greater depth in these studies.

### **Thematic synthesis findings**

The following presents findings on barriers and facilitators in 4 major analytical themes, representing synthesis of 11 descriptive sub-themes. Table 4 shows their relationship and provides a matrix of participant quotes exemplifying constituent themes. Study contribution to thematic barriers and facilitators is further detailed in on-line supplementary file 4.

BMJOpen\_Main\_Manuscript\_12.04.21

Table 4. Themes, corresponding studies and indicative quotes

| Descriptive Theme                                              | (N) Studies                                               | Indicative quotes                                                                                                                                                                                                                                                                                                                                                                                                                                                                                                                                                                                                                                                                                                                                                                                                                                               |
|----------------------------------------------------------------|-----------------------------------------------------------|-----------------------------------------------------------------------------------------------------------------------------------------------------------------------------------------------------------------------------------------------------------------------------------------------------------------------------------------------------------------------------------------------------------------------------------------------------------------------------------------------------------------------------------------------------------------------------------------------------------------------------------------------------------------------------------------------------------------------------------------------------------------------------------------------------------------------------------------------------------------|
| <b>Analytical theme 1: Optimising organisational readiness</b> |                                                           |                                                                                                                                                                                                                                                                                                                                                                                                                                                                                                                                                                                                                                                                                                                                                                                                                                                                 |
| <b>Theme 1.1<br/>Clinical need and remit</b>                   | N=18<br>(110, 113, 115-119, 121-126, 128-132)             | <ul style="list-style-type: none"> <li>•“It’s about framing your service so that actually people understand what benefit it’s going to be for them.”(126)</li> <li>•“Because I have to write, send it to the GP, it has to land on the GP’s desk, then the patient has gotta make an appointment to see that GP, then the prescription comes from the GP, and then they go and fulfil that prescription, and then make an appointment to come back and see me.”(123)</li> <li>•“You’re not waiting for medics to come and do your prescribing; you can do it as an autonomous practitioner, right from seeing the patient and, if they’ve got an instant need, you can prescribe and administer...the most crucial aspect of it—continuity of care.”(128)</li> </ul>                                                                                            |
| <b>Theme 1.2<br/>Managerial leadership</b>                     | N=18<br>(111-115, 118-126, 128-131)                       | <ul style="list-style-type: none"> <li>•“GPs do not understand the benefits of nurse prescribing.”(125)</li> <li>•“It’s just like having another partner who can deal with certain conditions, and who also works as a nurse within the practice.”(131)</li> <li>•“I phoned up for advice...but she (manager) really didn’t know... if I could prescribe for other practices out of hours or at the weekends. Anything I knew, I knew myself.”(121)</li> <li>•“I wanted to do the nurse prescribing course for two years – until the BNF was opened fully, it was not worth my while. Now it is, my employing GPs will not support me, even though all my work is in extended or advanced role. There is a large medical mountain of negativity to overcome.”(125)</li> </ul>                                                                                   |
| <b>Theme 1.3<br/>Inter-professional environment</b>            | N=11<br>(110, 111, 119, 121, 122, 124-126, 128, 129, 131) | <ul style="list-style-type: none"> <li>•“I’d ask the question why. Why? I mean if you want to be a doctor, be a doctor, if you want to be a nurse, be a nurse, but if you’re a nurse you can’t do nice bits of doctoring that you feel... I find it odd that other professions want to grab bits of medicine that’s out.. with their own training.”(131)</li> <li>•“t was building that trust that you could do it, and you were careful, and you were competent and you observed safety aspects.”(122)</li> <li>•“I’ve had nothing but support. They created a consulting room for me, put all the systems in place, the diagnostics, even putting notices in the notice-board for the first year or two so the patients were aware. And the staff were all made aware of it, we have practice meetings, the practice nurse was consulted....”(131)</li> </ul> |
| <b>Analytical theme 2: Optimising practitioner readiness</b>   |                                                           |                                                                                                                                                                                                                                                                                                                                                                                                                                                                                                                                                                                                                                                                                                                                                                                                                                                                 |
| <b>Theme 2.1:<br/>Selecting the right practitioners</b>        | N=14<br>(111, 113-118, 120, 123, 125, 126, 128, 130, 132) | <ul style="list-style-type: none"> <li>•“I don’t think we get paid enough to make those decisions. For me prescribing right does carry a lot of accountability and responsibility...at my level I’m not sure that’s something I’d want to take on board.”(123)</li> <li>•“You have to be competent, not only with your history taking... but, examination skills; you have to be able to examine... you have to be able to relate those findings... to the patient in a language that they can understand.”(117)</li> <li>•“She explained a lot of things that to be quite honest I didn’t really realize. Then she showed me a pattern of what</li> </ul>                                                                                                                                                                                                      |

BMJOpen\_Main\_Manuscript\_12.04.21

|                                                                 |                                                      |                                                                                                                                                                                                                                                                                                                                                                                                                                                                                                                                                                                                                                                                                                                                                                                                                                                                                                                                                   |
|-----------------------------------------------------------------|------------------------------------------------------|---------------------------------------------------------------------------------------------------------------------------------------------------------------------------------------------------------------------------------------------------------------------------------------------------------------------------------------------------------------------------------------------------------------------------------------------------------------------------------------------------------------------------------------------------------------------------------------------------------------------------------------------------------------------------------------------------------------------------------------------------------------------------------------------------------------------------------------------------------------------------------------------------------------------------------------------------|
|                                                                 |                                                      | <p><i>the insulin was doing and what the new insulin would do and how it would be beneficial to me. She went through it step-by-step and she explained a lot, and she drew little diagrams you know, an idiot proof kind of thing so you understand it.”(130)</i></p> <ul style="list-style-type: none"> <li>•<i>“[I tell patients]. . . ‘this is normal; this is normal. That’s really good. Your temperature’s normal,’ . . . this is what they’ve got and what the normal duration of that illness is. . . there’s no need for antibiotics. . . I try and present that as a positive so, ‘Oh, the good news is you don’t need any antibiotics. You can manage this yourself at home.’ It’s about how you give that message really.”(132)</i></li> <li>•<i>“If you give a very good physical assessment, and then go through your findings with them, they are quite happy to not have a prescription, most of the time.”(116)</i></li> </ul>   |
| <b>Theme 2.2<br/>Preparing for training</b>                     | N=5<br>(110-112, 123, 125)                           | <ul style="list-style-type: none"> <li>•<i>“Reassurance that I could do [the course] with present qualifications or what I need to do to obtain these before I do the prescriber’s course.”(125)</i></li> <li>•<i>“It was right at the beginning of the course when we started going through all the work and stuff and you think god how am I going to do this?”(112)</i></li> </ul>                                                                                                                                                                                                                                                                                                                                                                                                                                                                                                                                                             |
| <b>Theme 2.3:<br/>Optimising and supporting training</b>        | N=5<br>(110-112, 114, 125)                           | <ul style="list-style-type: none"> <li>•<i>“I think when we did our prescribing training . . . some of us had a lot of very active, proactive support from the medical mentors and some of us had less than that.”(114)</i></li> <li>•<i>“I have had to spend some time with my DMP to become familiar with the structure [of the course] and the competencies – that is not an assessment he has been really familiar with...I had to educate them . . . on how the course works.”(110)</i></li> <li>•<i>“As much as I would like but there be no-one doing my work while I am away. I just have to catch up.”(111)</i></li> </ul>                                                                                                                                                                                                                                                                                                               |
| <b>Analytical theme 3: Focusing on early transition support</b> |                                                      |                                                                                                                                                                                                                                                                                                                                                                                                                                                                                                                                                                                                                                                                                                                                                                                                                                                                                                                                                   |
| <b>Theme 3.1<br/>Transition as a point of vulnerability</b>     | N=7<br>(112, 117, 119, 121, 122, 128, 129)           | <ul style="list-style-type: none"> <li>•<i>“I think as soon as they realize you can prescribe they expect you to be able to do exactly what doctors can do. . . . They don’t understand your limitations . . . , and they expect you to sign repeat prescriptions, and send everybody through to you. So it can be quite difficult at times explaining to them.”(119)</i></li> <li>•<i>“I felt prepared, I felt excited, but I also felt petrified. Yes, the first prescription I sort of double checked, triple checked and I also rang the pharmacist afterwards to make sure I’d done it right.”(128)</i></li> <li>•<i>“When you’ve done the course, you lose a lot of confidence, because you learn a lot more about, you know the dilemmas and the ethics of prescribing, and that you’ve got to know a lot more about that drug before you prescribe it, so, then, it’s actually harder to prescribe it independently.”(129)</i></li> </ul> |
| <b>Theme 3.2<br/>Nurturing confidence and competence</b>        | N=9<br>(112, 114, 118, 119, 121, 122, 128, 129, 131) | <ul style="list-style-type: none"> <li>•<i>“When I start working in a practice, I tend to try and agree ground rules, rules of engagement... about what it is they want me to do....so if I get people with musculoskeletal problems.... I pass them over in that they expect me to just sort of stay within my boundaries.”(129)</i></li> <li>•<i>“I think once you start writing prescriptions, then that’s when other problems come up don’t they, that you have not come across until you actually start writing.”(112)</i></li> <li>•<i>“The first time I had to ask the GP if I was actually on the right lines, just for that support and that I was definitely doing the right thing. It’s not as difficult the second and the third and the fourth time.”(121)</i></li> </ul>                                                                                                                                                            |
| <b>Theme 3.3</b>                                                | N=8                                                  | <ul style="list-style-type: none"> <li>•<i>“If I am in any whatsoever doubt then I just buzz through to the GP (family physician).”(129)</i></li> <li>•<i>“I suppose the bottom line is I don’t get any formal support. I mean, I get support in an informal way from GPs</i></li> </ul>                                                                                                                                                                                                                                                                                                                                                                                                                                                                                                                                                                                                                                                          |



|                                                             |                                                                             |                                                                                                                                                                                                                                                                                                                                                                                                                                                                                                                                                                                                                                                                                                                                                                                                                                                                                                                                                                                                                                                                                                                                                                                                                                                                                                                                                                      |
|-------------------------------------------------------------|-----------------------------------------------------------------------------|----------------------------------------------------------------------------------------------------------------------------------------------------------------------------------------------------------------------------------------------------------------------------------------------------------------------------------------------------------------------------------------------------------------------------------------------------------------------------------------------------------------------------------------------------------------------------------------------------------------------------------------------------------------------------------------------------------------------------------------------------------------------------------------------------------------------------------------------------------------------------------------------------------------------------------------------------------------------------------------------------------------------------------------------------------------------------------------------------------------------------------------------------------------------------------------------------------------------------------------------------------------------------------------------------------------------------------------------------------------------|
| <p><b>Transition support needs</b></p>                      | <p>(113, 114, 117, 118, 121, 122, 128, 129)</p>                             | <p><i>and the consultant and my colleagues.”(121)</i></p> <ul style="list-style-type: none"> <li>• <i>” think they [doctors] sort of assume sometimes that we know more than we do, and I think they assume we have huge confidence in our skills when we don’t and what I would love is to sort of have a week or two a year when I was buddied up with a doctor, and he/she made me do all the prescribing. It would be terrifying but it would really make me learn, I think.”(122)</i></li> </ul>                                                                                                                                                                                                                                                                                                                                                                                                                                                                                                                                                                                                                                                                                                                                                                                                                                                                |
| <p><b>Analytical theme 4: Maximising and sustaining</b></p> |                                                                             |                                                                                                                                                                                                                                                                                                                                                                                                                                                                                                                                                                                                                                                                                                                                                                                                                                                                                                                                                                                                                                                                                                                                                                                                                                                                                                                                                                      |
| <p><b>Theme 4.1 Service delivery</b></p>                    | <p>N=14<br/>(113, 114, 116-119, 121, 122, 124, 126, 128, 129, 131, 132)</p> | <ul style="list-style-type: none"> <li>• <i>”Non-medical prescribing consultations—the time tends to be much longer.”(113)</i></li> <li>• <i>”You’ve sometimes got limited information ... their [GPs] notes come through like a summary. They can be helpful at times. Other times, it’s just lists going back years of medicines that have been prescribed.”(128)</i></li> <li>• <i>”I don’t think all our colleagues are clear about non-medical prescribing. Also, patient expectations can cause problems. It can be hard to persuade them that they don’t actually need a prescription. This causes pressure and takes up consultation time.”(118)</i></li> </ul>                                                                                                                                                                                                                                                                                                                                                                                                                                                                                                                                                                                                                                                                                              |
| <p><b>Theme 4.2 Developing and maximising roles</b></p>     | <p>N=14<br/>(113, 114, 116-119, 121, 122, 124, 126, 128, 129, 131, 132)</p> | <ul style="list-style-type: none"> <li>• <i>”It’s altered my role quite in depth because in the post I am in now we have open access drop-in sessions for minor illness. We see anything from an ingrown toenail to somebody with chest pain. In the afternoon we work on an appointment basis, running chronic disease management clinics and weight management clinics.”(119)</i></li> <li>• <i>”Expanding your prescribing may be difficult, not because of your knowledge of the drugs, but because there’s no training at a good enough level for the other stuff, you know, how do you become competent to treat osteoporosis, there are no courses.”(129)</i></li> <li>• <i>”I don’t think I have increased my scope over the years; to be frank, I think I have quite a limited range that I feel confident doing, using and I haven’t gone outside it. ...But I certainly don’t feel the need to suddenly become an expert in you know, Parkinson’s meds or anything; I just wouldn’t touch it.”(122)</i></li> <li>• <i>”I don’t see how that could happen with the QOF (Quality and Outcomes Framework) targets ... there will be no money there for the practice and you need to money to pay for nursing time. For (MH) there’s not a target ... so I genuinely don’t think it’s going to become part of the practice nurses remit.”(113)</i></li> </ul> |

## **Analytical theme 1: Organisational readiness**

This analytical theme identified organisational readiness, managerial cooperation and conducive inter-professional climate requisite for successful implementation. IP service need to rectify medicines pathway gaps and team implementation intention clarity were key. Consultation promoted collective vision for IP and helped team members understand their role in implementation. Collegiate environments with good inter-professional relations created conducive climates.

### **Theme 1.1: Clinical need and remit**

Identifying both clear need to manage patient prescribing and existing medicines pathway shortfalls were prerequisites for implementing IP. Studies described a highly qualified, specialist nursing and pharmacy workforce delivering unscheduled, scheduled and out-of-hours services(113-119, 121, 122, 124, 126, 128, 130-132) who routinely made autonomous clinical decisions necessitating prescribing and medicines optimisation skills(110, 115-117, 122, 128, 130, 132). IP held tangible advantage over former methods of GP referral and/or defacto prescribing for accessing medicines which, subject to GP workload(114, 124, 126) and constrained availability,(122, 124, 126, 128) were labour intensive,(122-124, 126, 128) inefficient,(118, 122, 123, 128) and burdened services and patients through additional healthcare contacts(115, 119, 121, 123, 124, 128, 130). By removing third party requirement, IP improved responsiveness with respect to medicines,(115, 117, 121, 122, 124, 126, 128, 130) enhanced care quality,(113, 124, 128) and helped prevent adverse outcomes(122).

Team clarity and transparency on IP implementation intentions was paramount(119, 121, 122, 124, 126, 128, 129, 131). Lack of IP role understanding could lead to poor integration,(131) role ambiguity(131) or misuse(113, 118, 122, 129). Consultative stakeholder processes helped clarify current medicines pathways bottle necks,(126) cemented clinical advantage of implementation(126) and encouraged collective understanding of IP(124, 126, 131). Conversely, if existing medicines pathways were perceived expedient and IP held limited advantage, adoption was less likely<sup>(123, 125)</sup>.

### **Theme 1.2: Managerial leadership**

Highly dependent on managerial cooperation, prescribers reported stage specific and on-going funding,(111, 123, 125) training(112-114, 118, 119, 121, 122, 129) and infrastructural needs(113, 114, 121, 122, 128, 129) extending across the IP implementation trajectory. Input was, however, frequently reported to diminish post-adoption(111-114, 118, 119, 121-

BMJOpen\_Main\_Manuscript\_12.04.21

1  
2  
3 123, 125, 128, 129) and many practitioners believed managers undervalued IP(113, 118,  
4 119, 123, 125) or misunderstood its service potential(113, 125). Prescribers ascribed high  
5 value to IP for improving service efficiency(117, 118, 121, 122, 128, 129) and skill  
6 utilisation,(113, 114, 118, 122) perceiving it extended clinical knowledge beyond  
7 prescribing,(113, 114, 122, 128) enhanced clinical confidence,(113, 119, 121, 122, 128) and  
8 job satisfaction,(118, 121, 128) and facilitated team education(113, 124, 131). Prescribers  
9 perceived themselves a unique workforce resource with potential for better mobilisation in  
10 under-resourced areas (e.g., mental health)(113). However, there was perception that  
11 management lacked appreciation of primary care workforce aspirations for IP(125) and  
12 overlooked its scope(113, 123, 125). Better recognition and commitment was considered  
13 essential for leveraging and driving IP services forward(113).  
14  
15  
16  
17  
18  
19  
20  
21

22 Ensuring teams understood IP and its role within care delivery mitigated subsequent  
23 barriers(118, 119, 122, 131). Understanding, particularly if IP reconfigured care(124, 126)  
24 was critical for implementation success(119, 121, 122, 124, 126, 128, 129, 131). Doctors,  
25 receptionists,(118, 119, 131) dispensing pharmacists,(128, 131) and peer colleagues(121,  
26 128, 129, 131) all played supervisory and/or infrastructural roles in IP and understanding the  
27 need for this input was essential. Staff clarity on their roles in relation to IP positively  
28 influenced willingness to provide enabling supports such as clinic administration,(118, 131)  
29 record access,(126) and pharmacy advice(122, 128). Acceptance and positive attitudes  
30 towards IP as a shared skill was facilitative(124, 126, 131) and mitigated the likelihood of  
31 “turf wars” emerging if IP roles was perceived to encroach on professional territories(131).  
32  
33  
34  
35  
36  
37  
38

### 39 **Theme 1.3: Inter-professional environment**

40 Trusting inter-professional relationships promoted different skill appreciation(131), helped  
41 ratify IP(110, 131) and built team confidence in the prescribing competence of nurses and  
42 pharmacists(110, 122). Good relationships facilitated information transfer(122), promoted  
43 supervision provision,(129, 131) shared learning(110) and team working(131). While many  
44 IPs reported positive relationships with doctors,(119, 121, 122, 128, 131) others described  
45 jurisdictional tensions(119, 125, 131). Building trust for IP where relationships were weak  
46 took time(124) and given the important supervisory role of doctors in IP,(113, 114, 118, 121,  
47 122, 128, 129) consideration of their strength in adoption planning is pertinent. Good  
48 communication networks were more likely where established relationships and positive  
49 attitudes towards IP prevailed,(122, 131) and were important for imparting team IP  
50 knowledge,(118, 124, 126) for developing supervision and peer support(122, 128) and  
51 promoting teamwork(126, 131).  
52  
53  
54  
55  
56  
57  
58  
59  
60

## **Analytical theme 2: Optimising practitioner readiness for training**

This analytical theme identified skills compatible with NMIP that are relevant to workforce selection. It identified need to optimise practitioner expectation and knowledge of training and improve provision of support during training.

### **Theme 2.1: Selecting the right practitioners**

Overall, strategic planning for IP workforce selection lacked scrutiny, and practitioner choice,(111, 113, 118) expectation of improved job satisfaction,(118, 125, 128) efficiency and patient benefit(111, 118) were primary drivers for uptake. Training course drop out(111) and failure to prescribe following training,(113, 114) suggest a need to ensure selection procedures match skills and capabilities to IP and increase chances of training investment. Synthesis identified essential skills(113, 115, 117, 118, 120, 128, 130, 132) and personal motivation(111, 113) as important considerations. Study demographic data indicated a clinically experienced workforce,(113, 118, 119, 128, 129) with degree/higher degree educational and/or specialist skills attainment(111, 115, 122, 130). Advanced physical assessment and clinical specialty skills not only suggested expertise and theoretical knowledge to underpin IP but were also recognised by patients as important contributors to care quality(115, 120, 130). Patients reported high levels of confidence in IP led care, with the caveat that prescribers demonstrated knowledge and expertise(115, 120, 130). Good interpersonal, communication, examination, history taking and diagnostic skills were key. These were mandatory for differential diagnosis(115-117, 130, 132) and holistic management,(118, 128, 132) for conferring prescribing decisions,(116, 117, 132) managing patient expectations for prescribing,(116, 117, 132) and promoting treatment concordance(113, 115, 117, 120, 126, 130, 132). Motivational deterrents to IP uptake identified by non-prescribing nurses(125) and physiotherapists(123) included being near retirement,(125) reticence for further training,(123, 125) concerns about training rigor,(123) and perception of effort/remuneration imbalance(123, 125). Although IP job satisfaction and professional benefits were considered future adoption drivers(125) lack of financial remuneration in particular disincentivised practice nurse(125) and physiotherapy adoption(123).

### **Theme 2.2: Preparing for training**

Using a generic, inter-professional model UK IP training programmes deliver 26 days equivalent fulltime education alongside a supervised learning in practice period(110). Given the onus for safe prescribing, programmes were reported by students and prescribers to be academically rigorous(112, 128). There was evidence however that students lacked key knowledge about the generic training model,(125) learning expectations of different

BMJOpen\_Main\_Manuscript\_12.04.21

1  
2  
3 pedagogies,(110) as well as course assessment and portfolio requirements(111). Expecting  
4 narrower, speciality specific rather than generic training was common(111, 128). Students  
5 found academic demands of training whilst continuing usual clinical duties challenging  
6 indicating a need to better balance work, personal and academic commitments(110, 112).  
7  
8  
9

### 10 **Theme 2.3: Optimising and supporting training**

11 The degree of allocated support time(111, 112) and the quality of mentoring during  
12 supervised practice learning(110) were key influences on student learning experiences.  
13 Adequate study leave, protected time and backfill respectively optimised study time, reduced  
14 personal time encroachment and negated need to absorb usual role duties while  
15 training(111). Despite organisational requirement to confirm study leave arrangements pre-  
16 training, primary care allocation was highly unstandardised, with some students entering  
17 training without confirmed agreement(111). Prepared practice mentors with clarity on role  
18 obligations in general provided higher levels of student input(110), and good mentor-student  
19 relationships that continued post-training facilitated transition(114). Additional training  
20 buddying schemes provided moral support for courses, although time constraints limited  
21 their uptake(112).  
22  
23  
24  
25  
26  
27  
28  
29  
30

### 31 **Analytical theme 3: Focusing on early transition support**

32 This analytical theme identified the transition period post-qualification key to development of  
33 confidence and competence, with high need for supervision and provision of informal and  
34 formal support. Delineating competence boundaries supports early prescribing development.  
35  
36  
37

### 38 **Theme 3.1: Transition as a point of vulnerability**

39 Many IPs held vivid memories of anxiety and fear during their first IP encounters,(119, 121,  
40 122, 128, 129) reporting a diminution of self-confidence during early transition(117, 119, 121,  
41 122, 128, 129). This finding traversed the review decade and was unrelated to how prepared  
42 prescribers felt by training(119, 128). Heightened awareness of the risks of error,(129) the  
43 cautionary approach instilled by training,(119, 129) and liability for personal  
44 accountability(121, 128) fuelled feelings. It was recognised that self-confidence and  
45 competence development were essential for prescribing(119, 129) and mitigated  
46 anxiety(128), but were highly dependent on exposure to prescribing opportunities,(128, 129)  
47 time(119, 129) and above all, available support levels(110, 114, 121, 128, 129). Without a  
48 channel for accessing supervision, prescribers could doubt competence, lose confidence  
49 and defer from prescribing(129). This led to lack of competence development and  
50 underutilisation of NMIP(129) and suggests greater acknowledgement of transitional  
51 developmental needs is necessary.  
52  
53  
54  
55  
56  
57  
58  
59  
60

### **Theme 3.2: Nurturing competence and confidence**

Establishing competence boundaries and recognising personal limitations was an important enabler in transition(119, 129). NMIPs defined competence as the immediate clinical areas in which they had the knowledge and confidence to prescribe(118, 119, 121, 122, 129, 131). Delineating its scope by self-restricted formula use within circumscribed clinical areas(118, 122, 128, 131) and adhering to clinical guidelines and protocols(119) encouraged early competence development,(129) whilst traversing its “comfort zones”,(119) as in cases of complex polypharmacy or comorbidity,(114, 122) was deemed risky, unsafe and unprofessional(118, 129, 131). Prescribers reported that teams often lacked acknowledgement of self-confidence issues related to competence,(122) and exerted inappropriate expectations for IP(114, 118, 119). Prescribers recognised that as a new skill, prescribing competence was time and opportunity dependent(119, 128, 129) and several expressed anxiety that prescribing skills would diminish during transition if not utilised(128).

### **Theme 3.3: Transition support needs**

Reports of poor transition support pervaded the review decade(113, 114, 117, 118, 121, 122, 128, 129) with limited evidence of pre-emptive, formalised supervision provision(114). NMIPs reported this absence as immediately impactful,(121) especially in isolated roles and in services with few prescribers(113, 129). While prescribers desired structured and informal supervision,(122) in all 7 studies addressing this theme,(113, 114, 118, 121, 122, 128, 129) most could only access a variable level of informal support. “Open door” contemporaneous advice provided from GPs was the primary source, although specialist doctors, peers and pharmacists were consulted. Team receptiveness to providing this mentoring,(129) its reliability(117, 121) and accessibility(128, 129) were key facilitators. Informal opportunities for discussion provided security(129) and were valued(118, 121, 128, 129). Exemplifying barrier interdependence, lack of mentoring relationships with doctors limited opportunity for informal support, prevented prescribing and limited competence with specific medicines or clinical conditions(129). In turn this necessitated re-engagement of GP referral for prescribing and culminated in inequitable patient medicines management(122, 129). To address shortfalls in formal support provision, several prescribers set up local peer networks,(114, 118, 122) however strong desire for formalised mentorship was expressed(122).

BMJOpen\_Main\_Manuscript\_12.04.21

#### **Analytical theme 4: Maximising and developing**

This analytical theme describes barriers and facilitators identified under the descriptive sub-themes *service delivery* and *role development* which relate to how IP is used and maximised in primary care.

##### **Theme 4.1: Service delivery**

Prescribers reached consensus that IP promoted efficient, streamlined services(118, 119, 121, 122, 124, 128). However, views on how it impacted individual practitioner workload were opposing(118, 119, 121, 122, 128, 129). NMIP reportedly lengthened consultations,(113, 118) added administrative tasks(121, 128) and increased job-related stress(118). Undertaking in-depth holistic assessment to inform prescribing needs imposed time constraints,(113, 132) which were exacerbated in strict ten-minute clinic allocation systems(117, 118). Additional time and experience could however be mitigating(117, 132). Community IPs reported their main workload barriers as administrative and related to absent or incompatible electronic record and prescription generation systems(114, 121, 122, 128, 129, 132). Seeking clinical information caused significant delays, in some cases causing IPs to revert to GP referral(114, 121, 128, 129). However, recent IT accessibility was suggested to mitigate retrieval problems(126).

Attitudes towards role change because of IP also influenced perceptions about workload (118, 119). Some prescribers perceived that prescribing skill acquisition inherently equated to GP responsibility abdication,(128) increased workload and job demand(118, 119). Prescribers negatively referred to these expectations as work offloading,(119) and were suspicious of underpinning financial motives(125). Alternatively, other prescribers viewed IP at broader service level benefit and opportunity to reduce GP colleague workforce pressures(114, 126, 128). While GPs in one study stressed their acceptance of pharmacist IP rested on whether it increased existing workload(124) limited team member involvement within studies precluded synthesis of wider primary care workload impact of IP.

##### **Theme 4.2: Developing and maximising roles**

Despite limited contextual detail on workforce planning and service arrangements for developing IP,(113, 126, 131) synthesis identified enhancement, substitution and role specific implementation “models”. These varied according to whether competence expansion changed client groups and/or whether service reconfiguration occurred. Role enhancement introduced IP to established practitioner roles (e.g., community matrons, nurse practitioners) within pre-existing service patterns and care arrangements(119, 121, 122, 128, 129, 131) and was associated with core minimum prescribing competence(122, 131). Substitution replaced GP services (e.g., out-of-hours GP services(116) and domiciliary palliative

BMJOpen\_Main\_Manuscript\_12.04.21

1  
2  
3 care,(128) minor illness and triage services(119) or extended service referral criteria(121,  
4 128). Service re-configuration accompanied this model, although change in competence was  
5 not always necessary(113, 121, 124, 126, 128). Role specific models, limited to pharmacist  
6 elderly residential care(124, 126) were implemented in IP naïve settings, and introduced  
7 specifically to utilise IP skills. Extension of core competence and major care reconfiguration  
8 were inherent. One study found that IP employment models influenced successful role  
9 integration,(131) with direct GP practice employment as opposed to commissioned IP  
10 services creating greater sense of permanence, better IP role use, and enhanced team  
11 involvement. More latterly, GP practice co-location for Clinical Commissioning Group  
12 employed clinical pharmacists was advocated to foster relationships, trust and team  
13 building(124, 126).  
14  
15  
16  
17  
18  
19  
20  
21

22 Personal advancement rather than organisational strategy appeared primary drivers of  
23 enhancement and substitution models,(131) although likelihood increased where skill mix  
24 was recognised,(126, 131) with CPD availability(131) and where doctors provided  
25 leadership(119, 131). Absent policy and national targets restrained IP resource  
26 allocation,(113) whilst policy and national guidance was facilitative(124, 126). Doctors also  
27 imposed constraints on IP by limiting clinical caseloads,(119, 129) restricting  
28 formularies(114, 131) or by retaining sole diagnostic prescribing responsibility for  
29 patients(113, 126). For some prescribers, competence expansion was synonymous with  
30 crossing job descriptions and mandated formal negotiation with employers(129).  
31  
32  
33  
34  
35  
36

37 Provision of CPD overall was inconsistent, untargeted to evolving learning needs(118, 129),  
38 and prescribers identified pharmacology,(121) statutory drug updates(118) as key topics.  
39 Lack of confidence with heart failure,(122) mental health conditions,(113) polypharmacy and  
40 off-label prescribing(129) suggested CPD in co-morbidities warranted further input. Trust  
41 provision included forums/meetings,(118, 122) commissioned training, national conference  
42 attendance(121, 131) and electronic journal resources(121). However, provision varied  
43 widely and with few prescribers reporting accessible CPD systems,(118, 122) there was  
44 agreement that improved implementation was necessary(113, 118, 121, 122, 129, 132).  
45  
46  
47  
48  
49  
50

51 With time and input to create support systems(122) and enhance communication concerning  
52 role boundaries(128) prescribers reported that IP integration improved. However, formal  
53 evaluation following implementation was rare(114), with only two studies(117, 132)  
54 identifying quality assurance activities beneficial to antibiotic stewardship evaluation  
55 including service outcome data audit and local/national data benchmarking.  
56  
57  
58  
59  
60



BMJOpen\_Main\_Manuscript\_12.04.21

## Discussion

The future of UK primary care is reliant on non-medical workforce expansion and introduction of new first-contact roles(21, 94, 133-135). Ensuring practitioners have the right skills to enable sustainable service development, at scale and pace is key(136, 137). An increase in UK non-medical prescriber numbers following PCN introduction(25, 65, 138) suggests prescribing capability is important for workforce transformation. This is the first meta-synthesis underpinned with implementation theory to address barriers and facilitators influencing IP exclusively in UK primary care settings.

Important to evidence synthesis for informing policy and practice,(71, 87, 139) theory can help make sense of implementation complexity and identify pathways to innovation success or failure(140). Covering adoption, implementation and dissemination stages(141), Diffusion of Innovation theory and the Consolidated Framework for Implementation Research aided identification of known organisational, practitioner and service-user level determinants(73, 142) and facilitated temporal examination of IP from initial identification of need to development in practice; a dimension lacking in previous UK reviews(56, 57, 59, 63). In its infancy in UK non-medical prescribing research(55), implementation theory will become increasingly important for informing strategies to overcome barriers as governance arrangements with extended prescribing rights become more complex across a greater number of regulators(138) and the primary care socio-political landscape continues to change(143).

From stakeholders' experiences of implementing IP, we identified barriers characterising adoption and implementation stages relating to organisational readiness, practitioner selection and support, transition and subsequent role development. While IP enhanced workforce skill utilisation and held service improvement potential, prescribers were concerned that it lacked strategic prominence in primary care. In line with national reports of inconsistent implementation across Clinical Commissioning Groups,(39, 42, 45) the statutory UK bodies responsible for the planning and commissioning of health care services, response to the non-medical prescribing agenda has been sluggish in some areas of the UK,(47) with reforms decentralising primary care commissioning either marginalising(47) or fragmenting its funding(144, 145). Moreover, in common with national evaluations,(39, 47, 146, 147) this synthesis identified a continuing practitioner led implementation of IP with largely voluntary uptake. Contrary to secondary care,(50) there was limited evidence(124, 126) for policy driven service design or targeted strategy embedding IP within career or service pathways. This suggests a disjointed approach to implementation that may reflect the rapidly changing policy and service context of UK primary care(148-150). However, with a third of the non-medical general practice workforce near retirement age,(151) and

BMJOpen\_Main\_Manuscript\_12.04.21

1  
2  
3 succession of Clinical Commissioning Group procured IP roles lacking guarantee,(131)  
4 sustainability of IP is a key concern for the primary care workforce and management of  
5 ongoing and future patient demand(152).  
6  
7  
8  
9

10 Transition was identified as a key stage in implementation that warrants greater scrutiny and  
11 has resonance for professions new to prescribing such as paramedics. While its affective  
12 nature(75, 153) and the need for bespoke support systems is previously recognised,(154,  
13 155) few studies have specifically sampled novice prescribers(153, 156) to ascertain optimal  
14 supervisory requirements(75). Despite. extension of IP rights to optometrists,  
15 physiotherapists, radiographers, podiatrists and paramedics over the past thirteen years,  
16 focus on implementation issues during transition within each profession has been limited(39,  
17 157, 158). This is likely to be especially important for paramedics who, awarded IP rights in  
18 2018 have not been subject to a supplementary prescribing lead in period that has  
19 characterised other professions(159) and are historically less well established in the primary  
20 care workforce(160, 161). Early data suggesting challenges around role isolation, team  
21 expectations for paramedic IP roles and lack of parity in legislation for controlled drugs  
22 warrant further exploration to determine whether this profession too, faces other barriers  
23 identified in this review(158, 162).  
24  
25  
26  
27  
28  
29  
30  
31  
32  
33

34 In common with other UK reviews,(56, 57) we found limited overall focus on the strategic  
35 element of IP implementation at either local, regional or national level. This may reflect the  
36 multiple changes made to policy,(163) leadership(164) and commissioning following the  
37 2012 Health and Social Care Act(165) and the on-going embedding of governance  
38 structures within PCN(166). Of note, despite finding a need for more cohesive managerial  
39 support that extends across the entire implementation trajectory, minimal reference was  
40 made to the championing and change agent functions of non-medical prescribing leads(154,  
41 155). The Department of Health has long recommended implementation of non-medical  
42 prescribing under direction of a designated lead with strategic, operational and governance  
43 footholds(28). A lack of representation in recent regional research(138) supports the tenet  
44 that many of these roles were not replaced by Clinical Commissioning Groups following  
45 abolition of primary care trusts(155). Successful implementation is more likely when  
46 champions are fully organisationally supported(167) to provide sustained input to  
47 implementation activities(154, 168, 169). However, a lack of non-medical prescribing lead  
48 role infrastructure, clarity and designated time,(138, 155) along with the increasingly diverse  
49 non-medical prescribing workforce is challenging this important role. While other models of  
50 workforce mentoring show promise in primary care,(170) the repetition and frequency of  
51  
52  
53  
54  
55  
56  
57  
58  
59  
60

BMJOpen\_Main\_Manuscript\_12.04.21

1  
2  
3 barriers exposed by this review indicate urgent need for a more cohesive approach to  
4 supporting IP.  
5  
6

### 7 **Strengths and limitations**

8  
9 This review strengthens the UK IP implementation evidence base by identifying theory  
10 based barriers and facilitators in traditional and contemporary primary care contexts. Using  
11 comprehensive search strategies and robust analysis methods, it highlights factors during  
12 adoption, practitioner selection, training and transition time points which can be used by  
13 practitioners and policymakers to identify areas for improving implementation support.  
14  
15  
16

17  
18 Although limited to UK literature, the use of theory ensured common factors known to  
19 facilitate implementation (e.g., overarching policy, the need for leadership and championing)  
20 and which are generalisable to any implementation context, in the UK or internationally were  
21 identified. We did not however include grey literature and although our qualitative synthesis  
22 enabled rich description of elements perceived by stakeholders to influence implementation  
23 of IP in the UK, reviews that include quantitative literature in primary care are encouraged.  
24 Our focus on primary care excluded barriers and facilitators that may be unique to acute  
25 care and other settings. Moreover, as the non-medical prescribing agenda is disseminated  
26 across the NHS, it will be increasingly important to consider the theoretical basis for  
27 developing strategies to achieve more successful implementation of this complex innovation  
28 in different professions(55, 78, 171).  
29  
30  
31  
32  
33  
34  
35  
36

### 37 **Conclusion**

38  
39 Globally, healthcare systems are implementing strategies to address workforce deficits that  
40 enhance the skills of nurses, pharmacists and other non-medical healthcare professionals.  
41 Integral to advanced scope of practice, it is imperative that independent prescribing  
42 capability use is optimised through successful implementation. This meta-synthesis has  
43 identified barriers at four key stages of implementation including initial organisational  
44 preparation, selection and support of practitioners during training, transition of prescribing  
45 into practice and long-term development and sustainability. Given predicted workforce  
46 shortfalls in the UK and around the world a more coordinated approach to implementation  
47 with greater managerial support to mitigate barriers across the entire implementation  
48 trajectory is urgently needed.  
49  
50  
51  
52  
53  
54  
55

### 56 **Author contributions**

57  
58 JE and NC conceived the study. JE obtained funding, oversaw all aspects of the project and  
59 contributed to all stages. JE drafted this paper. JE designed and executed all the searches,  
60

BMJOpen\_Main\_Manuscript\_12.04.21

1  
2  
3 data extraction, coding, and quality appraisal. NC contributed to all stages of the review,  
4 including data extraction and coding. MC and NC contributed to the evolving synthesis and  
5 formulation of conclusions.  
6  
7

### 8 9 **Funding**

10  
11 This work was supported by a University of Surrey Doctoral Scholarship 2018-2021 award  
12 (6522700).  
13

14  
15 **Competing interests** None declared.

16  
17 **Data sharing statement** No additional data are available.

18  
19 **Patient consent for publication** Not required.

20  
21 **Research Ethics Approval** Not applicable.

22  
23 **Provenance and peer review** Not commissioned, externally peer reviewed.  
24  
25  
26  
27  
28  
29  
30  
31  
32  
33  
34  
35  
36  
37  
38  
39  
40  
41  
42  
43  
44  
45  
46  
47  
48  
49  
50  
51  
52  
53  
54  
55  
56  
57  
58  
59  
60

peer review only

## References

1. Dugani S, Veillard J, Evans T. Quality primary health care will drive the realization of universal health coverage. *CMAJ*. 2018;190:E453-E4.
2. Kluge H, Kelley E, Swaminathan S, et al. After Astana: building the economic case for increased investment in primary health care. *Lancet*. 2018;392(10160):2147-52.
3. The King's Fund. The health care workforce in England. Make or break? London: The King's Fund; 2018.
4. Stenberg K, Hanssen O, Bertram M, et al. Guide posts for investment in primary health care and projected resource needs in 67 low-income and middle-income countries: a modelling study. *Lancet Glob Health*. 2019;7.
5. World Health Organization & United Nations Children's Fund (UNICEF). Operational framework for primary health care: transforming vision into action. Geneva: World Health Organization; 2020.
6. Barnett K, Mercer SW, Norbury M, et al. Epidemiology of multimorbidity and implications for health care, research, and medical education: a cross-sectional study. *Lancet*. 2012;380:37-43.
7. Stafford M, Steventon A, Thorlby R, Fisher R, Turton C, Deeny S. Briefing: Understanding the health care needs of people with multiple health conditions. London: The Health Foundation; 2018.
8. Guzman-Castillo M, Ahmadi-Abhari S, Bandosz P, et al. Forecasted trends in disability and life expectancy in England and Wales up to 2025: a modelling study. *Lancet Public Health*. 2017;2(7):e307-e13.
9. Kingston A, Robinson L, Booth H, et al. Projections of multi-morbidity in the older population in England to 2035: estimates from the Population Ageing and Care Simulation (PACSim) model. *Age Ageing*. 2018;47(3):374-80.
10. Smith SM, Wallace E, O'Dowd T, et al. Interventions for improving outcomes in patients with multimorbidity in primary care and community settings. *Cochrane Database Syst Rev*. 2016.
11. World Health Organization. Multimorbidity: Technical Series on Safer Primary Care. Geneva: World Health Organization; 2016.
12. Pettigrew LM, Kumpunen S, Mays N. Primary care networks: the impact of covid-19 and the challenges ahead. *BMJ*. 2020;370:m3353.
13. Greenhalgh T, Knight MA, Court C, et al. Management of post-acute covid-19 in primary care. *BMJ*. 2020;370.
14. Julia C, Yohan Saynac Y, Le Joubiou C, et al. Organising community primary care in the age of COVID-19: challenges in disadvantaged areas. *Lancet*. 2020;5 (6).
15. Williams S, Tsiligianni I. COVID-19 poses novel challenges for global primary care. *NPJ Prim Care Respir Med*. 2020;30(1):30.
16. IQVIA Institute for Human Data Science. Global Medicine Spending and Usage Trends: Outlook to 2024. New York: IQVIA Institute for Human Data Science; 2020.
17. Avery A, Barber N, Ghaleb M, et al. Investigating the Prevalence and Causes of Prescribing Errors in General Practice: The PRACTICE Study. General Medical Council; 2012.
18. NHS England and NHS Improvement. Integrating care: next steps to building strong and effective integrated care systems across England NHS England and NHS Improvement 2020.
19. Morciano M, Checkland K, Hammond J, et al. Variability in size and characteristics of primary care networks in England: observational study. *Br J Gen Pract*. 2020;70(701):e899-e905.
20. Department of Health. The NHS Long Term Plan. London, UK: Department of Health; 2019.
21. The King's Fund. Primary care networks explained. London: The King's Fund; 2020.
22. NHS England. Investment and evolution: A five-year framework for GP contract reform to implement The NHS Long Term Plan. London, UK: NHS England, British Medical Association; 2019.
23. Ladd E, Schober M. Nurse prescribing from the global vantage point: the intersection between role and policy. *Policy Polit Nurs Pract*. 2018;0(0):1-10.

BMJOpen\_Main\_Manuscript\_12.04.21

- 1
  - 2
  - 3
  - 4
  - 5
  - 6
  - 7
  - 8
  - 9
  - 10
  - 11
  - 12
  - 13
  - 14
  - 15
  - 16
  - 17
  - 18
  - 19
  - 20
  - 21
  - 22
  - 23
  - 24
  - 25
  - 26
  - 27
  - 28
  - 29
  - 30
  - 31
  - 32
  - 33
  - 34
  - 35
  - 36
  - 37
  - 38
  - 39
  - 40
  - 41
  - 42
  - 43
  - 44
  - 45
  - 46
  - 47
  - 48
  - 49
  - 50
  - 51
  - 52
  - 53
  - 54
  - 55
  - 56
  - 57
  - 58
  - 59
  - 60
24. Weeks G, George J, Maclure K, et al. Non-medical prescribing versus medical prescribing for acute and chronic disease management in primary and secondary care. *Cochrane Database Syst Rev*. 2016;11:CD011227.
25. Alghamdi SSA, Hodson K, Deslandes P, et al. Prescribing trends over time by non-medical independent prescribers in primary care settings across Wales (2011–2018): a secondary database analysis. *BMJ Open*. 2020;10(10):e036379.
26. National Prescribing Centre. Non-medical prescribing by nurses, optometrists, pharmacists, physiotherapists, podiatrists and radiographers. A quick guide for commissioners. Liverpool; 2010.
27. Hogg D, editor Prescription, supply and administration of medicines by allied health professionals - where are we now and where are we going? Regional AHP Non-Medical Prescriber Forum; 2019 April 11th Taunton.
28. Department of Health. Improving Patients' Access to Medicines: A Guide to Implementing Nurse and Pharmacist Independent Prescribing within the NHS in England. Leeds Department of Health; 2006.
29. Graham-Clarke E, Rushton A, Noblet T, et al. Non-medical prescribing in the United Kingdom National Health Service: a systematic policy review. *PLoS One*. 2019;14(7).
30. The Medicines for Human Use (Prescribing) (Miscellaneous Amendments) Order, Stat. 915 (1 May 2006) (2006).
31. The National Health Service. Miscellaneous Amendments Relating to Independent Prescribing Regulations. London; 2006.
32. General Pharmaceutical Council. Standards for the education and training of pharmacist independent prescribers. London: General Pharmaceutical Council; 2019.
33. Health and Care Professions Council. Standards for prescribing. London: Health and Care Professions Council; 2019.
34. Nursing and Midwifery Council. Standards for prescribing programmes 2019. Available at: <https://www.nmc.org.uk/standards/standards-for-post-registration/standards-for-prescribers/standards-of-proficiency-for-nurse-and-midwife-prescribers/>. Accessed: 05.01.21.
35. Department of Health. Supplementary Prescribing by Nurses, Pharmacists, Chiropodists/ Podiatrists, Physiotherapists and Radiographers within the NHS in England. London, UK: Crown Copyright; 2005.
36. Hales L, Lohan M, Jordan J. 'It's another way of standing outside the door' supplementary prescribing and doctor-nurse partnerships. *Soc Theory Health*. 2010;8(2):210-28.
37. Hill DR, Conroy S, Brown RC, et al. Stakeholder views on pharmacist prescribing in addiction services in NHS Lanarkshire. *J Subst Use*. 2014;19(1/2):56-67.
38. Carey N, Stenner K, Courtenay M. An exploration of how nurse prescribing is being used for patients with respiratory conditions across the east of England. *BMC Health Serv Res*. 2014;14:27.
39. Carey N, Stenner K, Edwards J, et al. Evaluation of Physiotherapist and Podiatrist Independent Prescribing, Mixing of Medicines and Prescribing of Controlled Drugs. Department of Health Policy Research PR-R7-0513-11002. Guildford, UK: University of Surrey; 2017.
40. Courtenay M, Carey N, Stenner K. An overview of non medical prescribing across one strategic health authority: a questionnaire survey. *BMC Health Serv Res*. 2012;12:138-.
41. Bhanbhro S, Drennan VM, Grant R, et al. Assessing the contribution of prescribing in primary care by nurses and professionals allied to medicine: a systematic review of literature. *BMC Health Serv Res*. 2011;11:330.
42. Latter S, Blenkinsopp A, Smith A, et al. Evaluation of nurse and pharmacist independent prescribing. University of Southampton; 2010.
43. Latter S, Smith A, Blenkinsopp A, et al. Are nurse and pharmacist independent prescribers making clinically appropriate prescribing decisions? An analysis of consultations. *J Health Serv Res Policy*. 2012;17(3):149-56.
44. Carey N, Edwards J, Otter S, et al. A comparative case study of prescribing and non-prescribing physiotherapists and podiatrists. *BMC Health Serv Res* 2020;20(1):1074.

BMJOpen\_Main\_Manuscript\_12.04.21

- 1
- 2
- 3
- 4 45. Courtenay M, Khanfer R, Harries-Huntly G, et al. Overview of the uptake and
- 5 implementation of non-medical prescribing in Wales: a national survey. *BMJ Open*.
- 6 2017;7(9):e015313.
- 7 46. Dobel-Ober D, Brimblecombe N. National survey of nurse prescribing in mental health
- 8 services; a follow-up 6 years on. *J Psychiatr Ment Health Nurs*. 2016;23(6/7):378-86.
- 9 47. Coull A, Murray I, Turner-Halliday F, et al. The expansion of nurse prescribing in Scotland: an
- 10 evaluation. *Br J Community Nurs*. 2013;18(5):235-42.
- 11 48. Drennan J, Naughton C, Allen D, et al. Independent Evaluation of the Nurse and Midwife
- 12 Prescribing Initiative. Dublin: University College Dublin; 2009.
- 13 49. Casey M, Rhode D, Higgins A, et al. "Providing a complete episode of care": a survey of
- 14 registered nurse and registered midwife prescribing behaviours and practices. *J Clin Nurs*.
- 15 2020;29:152-62.
- 16 50. Fisher J, Kinnear M, Reid F, et al. What supports hospital pharmacist prescribing in Scotland?
- 17 - A mixed methods, exploratory sequential study. *Res Social Adm Pharm*. 2018;14(5):488-97.
- 18 51. Ross JD, Kettles AM. Mental health nurse independent prescribing: what are nurse
- 19 prescribers' views of the barriers to implementation? *J Psychiatr Ment Health Nurs*.
- 20 2012;19(10):916-32.
- 21 52. Stewart D, Maclure K, Newham R, et al. A cross-sectional survey of the pharmacy workforce
- 22 in general practice in Scotland. *Fam Pract*. 2020;37(2):206-12.
- 23 53. General Pharmaceutical Council. Prescribers survey report. London; 2016.
- 24 54. Stenner K, Carey N, Courtenay M. Implementing nurse prescribing: a case study in diabetes. *J*
- 25 *Adv Nurs*. 2010;66(3):522-31.
- 26 55. Stewart D, Jebara T, Cunningham S, et al. Future perspectives on nonmedical prescribing.
- 27 *Ther Adv Drug Saf*. 2017;8(6):183-97.
- 28 56. Graham-Clarke E, Rushton A, Noblet T, et al. Facilitators and barriers to non-medical
- 29 prescribing - A systematic review and thematic synthesis. *PLoS One*. 2018;13(4):e0196471-e.
- 30 57. Noblet T, Marriott J, Graham-Clarke E, et al. Barriers to and facilitators of independent non-
- 31 medical prescribing in clinical practice: a mixed-methods systematic review. *J Physiother*.
- 32 2017;63(4):221-34.
- 33 58. Jebara T, Cunningham S, MacLure K, et al. Stakeholders' views and experiences of
- 34 pharmacist prescribing: a systematic review. *Br J Clin Pharmacol*. 2018;84(9):1883-905.
- 35 59. Mills T, Patel N, Ryan K. Pharmacist non-medical prescribing in primary care. A systematic
- 36 review of views, opinions, and attitudes. *Int J Clin Pract*. 2020:e13827.
- 37 60. Nuttall D. Nurse prescribing in primary care: a metasynthesis of the literature. *Prim Health*
- 38 *Care Res Dev*. 2018;19(1):7-22.
- 39 61. Zhou M, Desborough J, Parkinson A, et al. Barriers to pharmacist prescribing; a scoping
- 40 review comparing UK, New Zealand, Canadian and Australian experiences. *Int J Pharm Pract*.
- 41 2019;27(6):479-89.
- 42 62. Edwards J, Coward M, Carey N. Paramedic independent prescribing in primary care: seven
- 43 steps to success. *Journal of Prescribing Practice*. 2020;2(6):292-9.
- 44 63. Magowan J. Barriers and enablers to nurse prescribing in primary care. *Journal of Prescribing*
- 45 *Practice*. 2020;2(3):142-6.
- 46 64. Mann C, Anderson C, Waring J, et al. "GP Pharmacy Transformation project" Community
- 47 Pharmacist Independent Prescribers (CPIPs) working in patient facing roles in Primary Care.
- 48 Independent Evaluation Report. Nottingham: University of Nottingham, NHS England; 2017.
- 49 65. Northamptonshire GP Forward View Programme. Primary Care Workforce Strategy.
- 50 Northampton: Corby Clinical Commissioning Group and Nene Clinical Commissioning Group; 2017.
- 51 66. Greenhalgh T, Robert G, Macfarlane F, et al. Diffusion of innovations in service organizations:
- 52 systematic review and recommendations. *Milbank Q*. 2004;82(4):581-629.
- 53 67. Rogers E. Diffusion of Innovations. 5th ed. New York, USA: The Free Press; 2003.
- 54
- 55
- 56
- 57
- 58
- 59
- 60

BMJOpen\_Main\_Manuscript\_12.04.21

- 1  
2  
3 68. Damschroder L, Keith RE, Aaron DC, et al. Fostering implementation of health services  
4 research findings into practice: A consolidated framework for advancing implementation science.  
5 *Implement Sci.* 2009;4(1).  
6  
7 69. Lambert-Kertzner AC, Aasen DM, Overbey DM, et al. Use of the consolidated framework for  
8 implementation research to guide dissemination and implementation of new technologies in  
9 surgery. *J Thorac Dis.* 2019;11(4):S487–S99.  
10  
11 70. Giacconi M. Theory matters in qualitative health research In: Bourgeault I, Dingwall R, De  
12 Vries R, editors. *The SAGE Handbook of Qualitative Methods in Health Research.* London: SAGE  
13 Publications Ltd; 2010. p. 125–55.  
14  
15 71. Noyes J, Hendry M, Booth A, et al. Current use was established and Cochrane guidance on  
16 selection of social theories for systematic reviews of complex interventions was developed. *Journal*  
17 *of clinical epidemiology.* 2016;75:78-92.  
18  
19 72. Chor KH, Wisdom JP, Olin SC, et al. Measures for predictors of innovation adoption. *Adm*  
20 *Policy Ment Health.* 2015 42(5):545-73.  
21  
22 73. Dearing J, Cox J. Diffusion Of Innovations Theory, Principles, And Practice. *Health Aff.*  
23 2018;37:183-90.  
24  
25 74. Dearing JW, Singhal A. New directions for diffusion of innovations research: Dissemination,  
26 implementation, and positive deviance. *Hum Behav Emerg Technol.* 2020;2(4):307-13.  
27  
28 75. Abuzour AS, Lewis PJ, Tully MP. Practice makes perfect: A systematic review of the expertise  
29 development of pharmacist and nurse independent prescribers in the United Kingdom. *Res Social*  
30 *Adm Pharm.* 2018;14(1):6-17.  
31  
32 76. Royal Pharmaceutical Society. *A Competency Framework for all Prescribers* London: The  
33 Royal Pharmaceutical Society; 2016 [Available from:  
34 <https://www.rpharms.com/resources/frameworks/prescribers-competency-framework>.  
35  
36 77. Weiss MC. The rise of non-medical prescribing and medical dominance. *Res Social Adm*  
37 *Pharm.* 2020.  
38  
39 78. Nilsen P. Making sense of implementation theories, models and frameworks. *Implement Sci.*  
40 2015;10(53).  
41  
42 79. Nilsen P, Bernhardsson S. Context matters in implementation science: a scoping review of  
43 determinant frameworks that describe contextual determinants for implementation outcomes. *BMC*  
44 *Health Serv Res.* 2019;19.  
45  
46 80. Breimaier HB, Heckemann B, Halfens RJG, et al. The Consolidated Framework for  
47 Implementation Research (CFIR): a useful theoretical framework for guiding and evaluating a  
48 guideline implementation process in a hospital-based nursing practice. *BMC Nurs.* 2015;14.  
49  
50 81. Consolidated Framework for Implementation Research. [Internet]. CFIR Research Team-  
51 Center for Clinical Management Research. 2021. Available from: <https://cfirguide.org/tools/>.  
52 Accessed: 21.01.21.  
53  
54 82. Damschroder LJ, Reardon CM, Sperber N, et al. Implementation evaluation of the Telephone  
55 Lifestyle Coaching (TLC) program: organizational factors associated with successful implementation.  
56 *Transl Behav Med.* 2017;7(2):233-41.  
57  
58 83. Tong A, Flemming K, McInnes E, et al. Enhancing transparency in reporting the synthesis of  
59 qualitative research: ENTREQ. *BMC Med Res Methodol.* 2012;12(1):181.  
60  
61 84. Aguirre R, Bolton K. Qualitative interpretive meta-synthesis in social work research:  
62 Uncharted territory. *J Soc Work.* 2014;14:279-94.  
63  
64 85. Nye E, Melendez-Torres GJ, Bonell C. Origins, methods and advances in qualitative meta-  
65 synthesis. *Rev Educ.* 2016;4(1):57-79.  
66  
67 86. Michie S, Fixsen D, Grimshaw JM, et al. Specifying and reporting complex behaviour change  
68 interventions: the need for a scientific method. *Implement Sci.* 2009;4(1):40.  
69  
70 87. Booth A, Noyes J, Flemming K, et al. Guidance on choosing qualitative evidence synthesis  
71 methods for use in health technology assessments of complex interventions. 2016. Available at:  
72 <http://www.integrate-hta.eu/downloads/>. Accessed: 27.01.21



BMJOpen\_Main\_Manuscript\_12.04.21

- 1
- 2
- 3
- 4 88. National Cancer Institute. Qualitative Research in Implementation Science (QualRIS). USA: U.S. Department of Health and Human Sciences, National Institutes of Health; 2019.
- 5
- 6 89. Cooke A, Smith D, Booth A. Beyond PICO: the SPIDER tool for qualitative evidence synthesis. Qual Health Res. 2012;22(10):1435-43.
- 7
- 8 90. Rogers M, Bethel A, Abbott R. Locating qualitative studies in dementia on MEDLINE, EMBASE, CINAHL, and PsycINFO: A comparison of search strategies. Res Synth Methods. 2018;9(4):579-86.
- 9
- 10
- 11 91. Rosumeck S, Wagner M, Wallraf S, et al. A validation study revealed differences in design and performance of search filters for qualitative research in PsycINFO and CINAHL. Journal of clinical epidemiology. 2020;128:101-8.
- 12
- 13
- 14 92. HM Government. The Health and Social Care Act 2012. London: The Stationery Office; 2012.
- 15
- 16 93. NHS England. Five Year Forward View. London, UK: NHS England; 2014.
- 17
- 18 94. NHS England. General Practice Forward View. London, UK: NHS England; 2016.
- 19
- 20 95. Liberati A, Altman DG, Tetzlaff J, et al. The PRISMA statement for reporting systematic reviews and meta-analyses of studies that evaluate health care interventions: Explanation and elaboration. PLoS Med. 2009;6.
- 21
- 22 96. Sirriyeh R, Lawton R, Gardner P, et al. Reviewing studies with diverse designs: the development and evaluation of a new tool. J Eval Clin Pract. 2012;18(4):746-52.
- 23
- 24 97. Miller T, Bonas S, Dixon Woods M. Qualitative research on breastfeeding in the UK: a narrative review and methodological reflection. Evid Policy. 2007;3:197-230.
- 25
- 26 98. Noyes J, Popay J. Directly observed therapy and tuberculosis: how can a systematic review of qualitative research contribute to improving services? A qualitative meta-synthesis. J Adv Nurs. 2007;57(3):227-43.
- 27
- 28
- 29 99. Carroll C, Booth A, Lloyd-Jones M. Should we exclude inadequately reported studies from qualitative systematic reviews? An evaluation of sensitivity analyses in two case study reviews. Qual Health Res. 2012;22:1425-34.
- 30
- 31
- 32 100. Noyes J, Booth A, Flemming K, et al. Cochrane Qualitative and Implementation Methods Group Guidance paper 2: Methods for assessing methodological limitations, data extraction and synthesis, and confidence in synthesized qualitative findings. Journal of clinical epidemiology. 2018;97.
- 33
- 34
- 35
- 36
- 37 101. National Institute of Care and Health Excellence. Developing NICE guidelines: the manual. London 2020 (updated 27.12.20). Available at: <https://www.nice.org.uk/process/pmg20/chapter/reviewing-research-evidence>. Accessed: 04.02.21.
- 38
- 39
- 40 102. Noyes J, Booth A, Lewin S, et al. Applying GRADE-CERQual to qualitative evidence synthesis findings-paper 6: how to assess relevance of the data. Implement Sci. 2018;13(Suppl 1):4.
- 41
- 42
- 43 103. Sandelowski M. What ever happened to qualitative description? Res Nurs Health. 2000;23:334-40.
- 44
- 45 104. Checkland K, Harrison S, Marshall M. Is the metaphor of 'barriers to change' useful in understanding implementation? Evidence from general medical practice. J Health Serv Res Policy. 2007;12(2):95-100.
- 46
- 47
- 48 105. Hossain LN, Fernandez-Llimos F, Lockett T, et al. Qualitative meta-synthesis of barriers and facilitators that influence the implementation of community pharmacy services: perspectives of patients, nurses and general medical practitioners. BMJ Open. 2017;7(9):e015471.
- 49
- 50
- 51 106. QSR International Pty Ltd. NVivo qualitative data analysis software, Version 12. 2018.
- 52
- 53 107. Booth A, Carroll C, Ilott I, et al. Desperately seeking dissonance: identifying the disconfirming case in qualitative evidence synthesis. Qual Health Res. 2013;23(1):126-41.
- 54
- 55 108. Bazeley P. Analysing qualitative data: More than 'identifying themes'. Malays J Qual Res. 2009;2.
- 56
- 57 109. Paramedic PhD. Exploring the implementation of paramedic independent prescribing in primary care: a mixed-methods multiple case study. 2020. Available at: <https://www.paramedicphd.com/registers/doctorate-register/judith-edwards>. Accessed: 03.02.21.
- 58
- 59
- 60

BMJOpen\_Main\_Manuscript\_12.04.21

110. Afseth JD, Paterson RE. The views of non-medical prescribing students and medical mentors on interprofessional competency assessment – A qualitative exploration. *Nurse Educ Today*. 2017;52:103-8.
111. Boreham N, Coull AF, Murray ID, et al. Education programmes preparing independent prescribers in Scotland: an evaluation. *Nurse Educ Today*. 2013;33(4):321-6.
112. Bowskill D, Meade O, Lymn JS. Use and evaluation of a mentoring scheme to promote integration of non-medical prescribing in a clinical context. *BMC Med Educ*. 2014;14:177.
113. Brodie L, Donaldson J, Watt S. Non-medical prescribers and benzodiazepines: A qualitative study. *Nurse Prescribing*. 2014;12(7):353-9.
114. Cole T, Gillett K. Are nurse prescribers issuing prescriptions in palliative care? *Nurse Prescribing*. 2015;13(2):98-102.
115. Courtenay M, Stenner K, Carey N. The views of patients with diabetes about nurse prescribing. *Diabet Med*. 2010;27(9):1049-54.
116. Courtenay M, Rowbotham S, Lim R, et al. Antibiotics for acute respiratory tract infections: a mixed-methods study of patient experiences of non-medical prescriber management. *BMJ Open*. 2017;7(3):e013515-e.
117. Courtenay M, Rowbotham S, Lim R, et al. Examining influences on antibiotic prescribing by nurse and pharmacist prescribers: a qualitative study using the Theoretical Domains Framework and COM-B. *BMJ Open*. 2019;9(6):e029177.
118. Cousins R, Donnell C. Nurse prescribing in general practice: a qualitative study of job satisfaction and work-related stress. *Fam Pract*. 2012;29(2):223-7.
119. Daughtry J, Hayter M. A qualitative study of practice nurses' prescribing experiences. *Practice Nursing*. 2010;21(6):310-4.
120. Dhalivaal J. Patients' perspectives on prescribing by nurses in general practice. *Practice Nursing*. 2011;22(1):41-6.
121. Downer F, Shepherd CK. District nurses prescribing as nurse independent prescribers. *Br J Community Nurs*. 2010;15(7):348-52.
122. Herklots A, Baileff A, Latter S. Community matrons' experience as independent prescribers. *Br J Community Nurs*. 2015;20(5):217.
123. Holden MA, Whittle R, Waterfield J, et al. A mixed methods exploration of physiotherapist's approaches to analgesic use among patients with hip osteoarthritis. *Physiotherapy*. 2019;105(3):328-37.
124. Inch J, Notman F, Bond CM, et al. The Care Home Independent Prescribing Pharmacist Study (CHIPPS) - a non-randomised feasibility study of independent pharmacist prescribing in care homes. *Pilot Feasibility Stud*. 2019;5:89.
125. Kelly A, Neale J, Rollings R. Barriers to extended nurse prescribing among practice nurses. *Community Pract*. 2010;83(1):21-4.
126. Lane K, Bond C, Wright D, et al. "Everyone needs to understand each other's systems": Stakeholder views on the acceptability and viability of a Pharmacist Independent Prescriber role in care homes for older people in the UK. *Health Soc Care Community*. 2020;28(5):1479-87.
127. Latham K, Nyatanga B. Community palliative care clinical nurse specialists as independent prescribers: part 1. *Br J Community Nurs*. 2018;23(2):94-8.
128. Latham K, Nyatanga B. Community palliative care clinical nurse specialists as independent prescribers: part 2. *Br J Community Nurs*. 2018;23(3):126-33.
129. Maddox C, Halsall D, Hall J, et al. Factors influencing nurse and pharmacist willingness to take or not take responsibility for non-medical prescribing. *Res Social Adm Pharm*. 2016;12(1):41-55.
130. Stenner KL, Courtenay M, Carey N. Consultations between nurse prescribers and patients with diabetes in primary care: A qualitative study of patient views. *Int J Nurs Stud*. 2011;48(1):37-46.
131. Weiss MC, Platt J, Riley R, et al. GPs, nurses and pharmacists as prescribers in primary care: an exploration using the social identity approach / Hausärzte/-innen, Diplomierte



BMJOpen\_Main\_Manuscript\_12.04.21

- 1  
2  
3 153. Bowskill D, Timmons S, James V. How do nurse prescribers integrate prescribing in practice: case studies in primary and secondary care. *J Clin Nurs*. 2013;22(13-14):2077-86.
- 4 154. Courtenay M, Carey N, Stenner K. Non medical prescribing leads views on their role and the  
5 implementation of non medical prescribing from a multi-organisational perspective. *BMC Health  
6 Serv Res*. 2011;11:142.
- 7 155. Lim RHM, Courtenay M, Fleming G. Roles of the non-medical prescribing leads within  
8 organisations across a Strategic Health Authority: perceived functions and factors supporting the  
9 role. *Int J Pharm Pract*. 2013;21(2):82-91.
- 10 156. Ziegler L, Bennett M, Blenkinsopp A, et al. Non-medical prescribing in palliative care: a  
11 regional survey. *Palliat Med*. 2015;29(2):177-81.
- 12 157. Spillane D, Courtenay M, Chater A, et al. Factors influencing the prescribing behaviour of  
13 independent prescriber optometrists: a qualitative study using the Theoretical Domains Framework.  
14 *Ophthalmic Physiol Opt*. 2021.
- 15 158. Stenner K, van Even S, Collen A. Early adopters of paramedic prescribing: a qualitative study.  
16 *Br Paramed J*. 2019;4(3):57.
- 17 159. College of Paramedics. Improving Patients' Access to Medicines: A Guide to Implementing  
18 Paramedic Prescribing within the NHS in the UK. Bridgewater, UK: College of Paramedics; 2018.
- 19 160. Eaton G, Wong G, Williams V, et al. Contribution of paramedics in primary and urgent care: a  
20 systematic review. *Br J Gen Pract*. 2020;70(695):e421.
- 21 161. Wagstaff B, Mistry V. The integration of paramedics into primary care. *Br J Gen Pract*.  
22 2020;70(692).
- 23 162. Dixon M. The developing role of the paramedic prescriber. *Journal of Prescribing Practice*.  
24 2020;2(2):98-100.
- 25 163. Regmi K, Mudyarabikwa O. A systematic review of the factors - barriers and enablers -  
26 affecting the implementation of clinical commissioning policy to reduce health inequalities in the  
27 National Health Service (NHS), UK. *Public Health*. 2020;186:271-82.
- 28 164. Marshall M, Holti R, Hartley J, et al. GP leadership in clinical commissioning groups: a  
29 qualitative multi-case study approach across England. *Br J Gen Pract*. 2018;68(671):e427.
- 30 165. Peckham P, Falconer J, Gillam S, et al. The organisation and delivery of health improvement  
31 in general practice and primary care: a scoping study. Southampton (UK): NIHR Journals Library:  
32 PMID: 26131542; 2015.
- 33 166. Smith JA, Parkinson S, Harshfield A, et al. Early evidence of the development of primary care  
34 networks in England: a rapid evaluation study. Southampton: NIHR Health Services and Delivery  
35 Research Topic Report; 2020.
- 36 167. Bunce AE, Groß I, Davis JV, et al. Lessons learned about the effective operationalization of  
37 champions as an implementation strategy: results from a qualitative process evaluation of a  
38 pragmatic trial. *Implement Sci*. 2020;15(1):87.
- 39 168. Miech EJ, Rattray NA, Flanagan ME, et al. Inside help: an integrative review of champions in  
40 healthcare-related implementation. *SAGE Open Med*. 2018;6.
- 41 169. Powell BJ, Thomas JW, Chinman MJ, et al. A refined compilation of implementation  
42 strategies: results from the expert recommendations for implementing change (ERIC) project.  
43 *Implement Sci*. 2015;10(21).
- 44 170. Bryce C, Russell R, Dale J. Learning from the transfer of a fellowship programme to support  
45 primary care workforce needs in the UK: a qualitative study. *BMJ Open*. 2019;9(1):e023384.
- 46 171. O'Cathain A, Croot L, Duncan E, et al. Guidance on how to develop complex interventions to  
47 improve health and healthcare. *BMJ Open*. 2019;9(8):e029954.
- 48  
49  
50  
51  
52  
53  
54  
55  
56  
57  
58  
59  
60

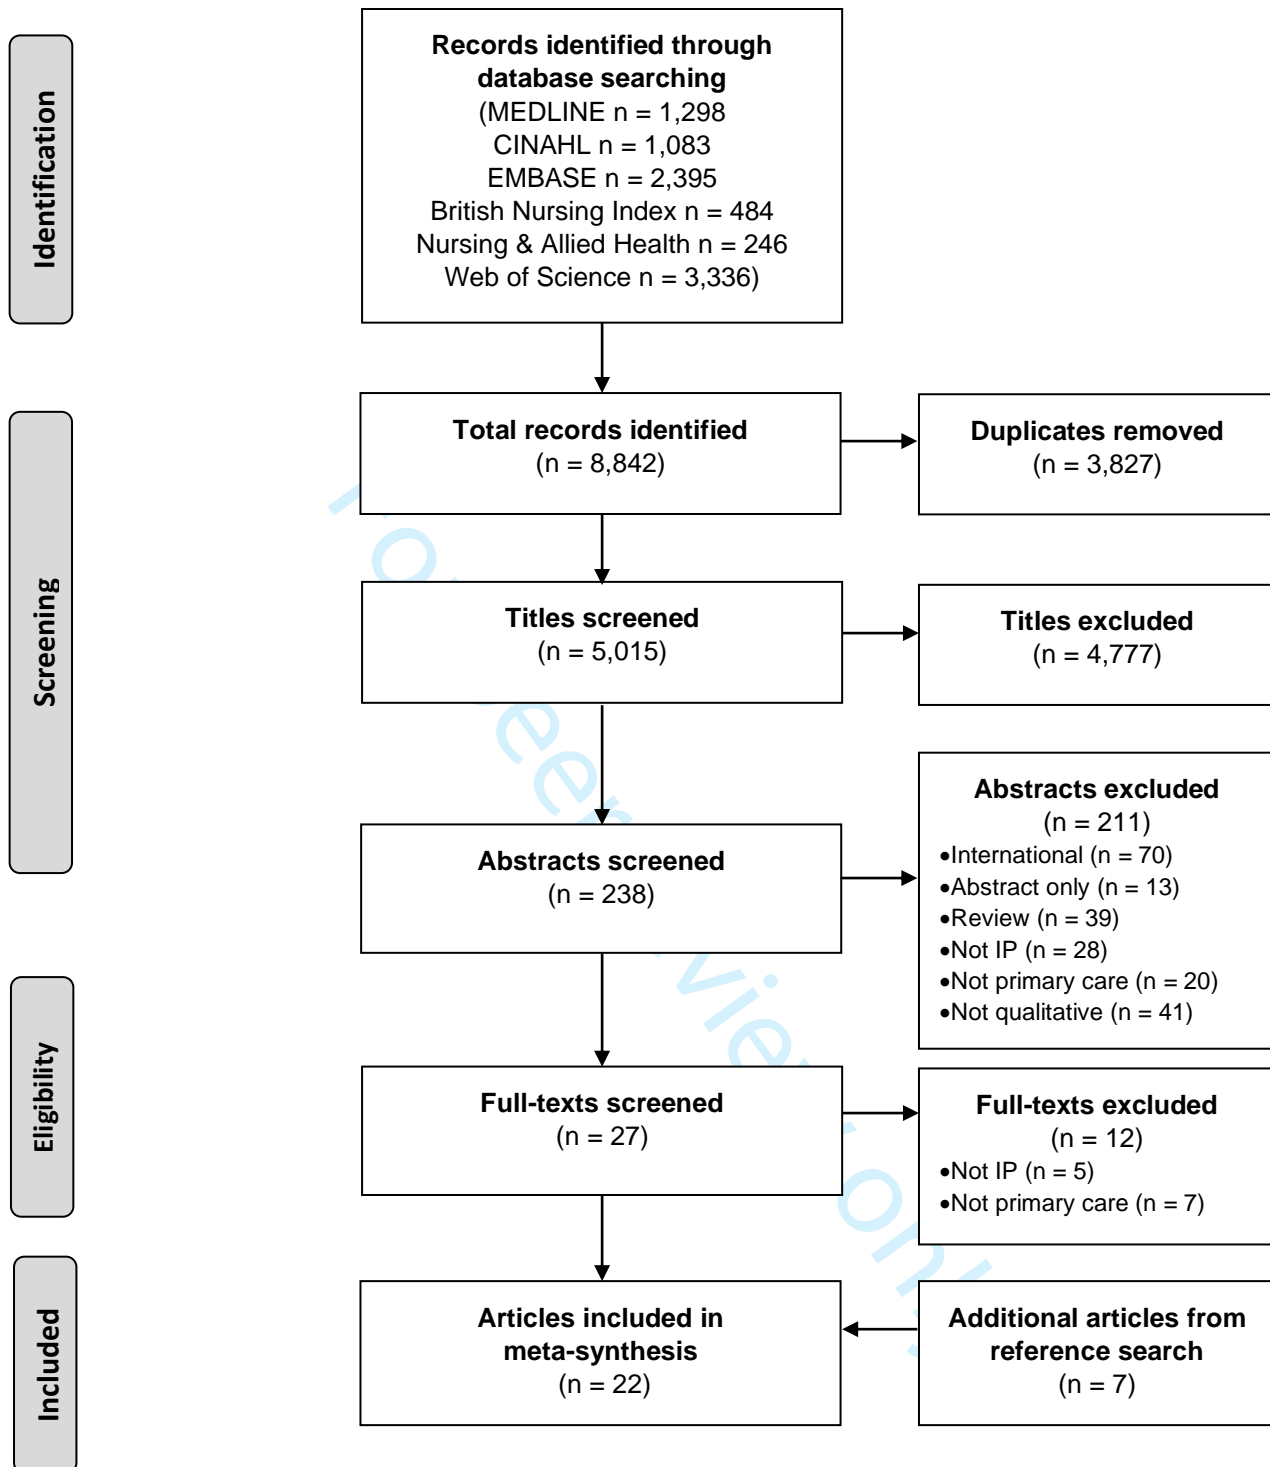

Supplementary\_File\_1\_28.02.21

## Supplementary File 1. MEDLINE search string

| EBSCO host; MEDLINE |                                                                                |         |
|---------------------|--------------------------------------------------------------------------------|---------|
| 1                   | (MM "Family Practice")                                                         | 42,149  |
| 2                   | (MM "Primary Health Care")                                                     | 52,315  |
| 3                   | (MM "Physicians, Family")                                                      | 11,183  |
| 4                   | (MH "Community Health Nursing")                                                | 19,640  |
| 5                   | (MH "Community Health Workers")                                                | 5,502   |
| 6                   | (MH "Community Health Services")                                               | 32,035  |
| 7                   | (MH "Community Health Centres")                                                | 34,071  |
| 8                   | TI (community N1 health) OR AB (community N1 health)                           | 41,477  |
| 9                   | TI (community N1 care) OR AB (community N1 care)                               | 13,601  |
| 10                  | TI (primary N1 health) OR AB (primary N1 health)                               | 28,349  |
| 11                  | TI (primary N1 care) OR AB (primary N1 care)                                   | 138,944 |
| 12                  | TI (general N1 practice*) OR AB (general N1 practice*)                         | 45,549  |
| 13                  | TI (general N1 practitioner*) OR AB (general N1 practitioner*)                 | 53,594  |
| 14                  | TI (family N1 practice*) OR AB (family N1 practice*)                           | 10,921  |
| 15                  | TI (family N1 practitioner*) OR AB (family N1 practitioner*)                   | 2,955   |
| 16                  | TI (gp N1 practice*) OR AB (gp N1 practice*)                                   | 2,067   |
| 17                  | TI (gp N1 service*) OR AB (gp N1 service*)                                     | 433     |
| 18                  | TI (gp N1 clinic*) OR AB (gp N1 clinic*)                                       | 341     |
| 19                  | OR/1-18                                                                        | 343,938 |
| 20                  | TI prescrib* OR AB prescrib*                                                   | 153,174 |
| 21                  | TI independent prescrib* OR AB independent prescrib*                           | 508     |
| 22                  | TI non-medical prescrib* OR AB non-medical prescrib*                           | 208     |
| 23                  | OR/20-22                                                                       | 153,174 |
| 24                  | TI nurs* OR AB nurs*                                                           | 460,786 |
| 25                  | TI physiotherap* OR AB physiotherap*                                           | 26,543  |
| 26                  | TI pharmacist* OR AB pharmacist*                                               | 34,354  |
| 27                  | TI (podiatr* OR chiropod*) OR AB (podiatr* OR chiropod*)                       | 3,274   |
| 28                  | TI radiographer* OR AB radiographer*                                           | 1,746   |
| 29                  | TI (dietician* OR dietician*) OR AB (dietician* OR dietician*)                 | 7,306   |
| 30                  | TI paramedic* OR AB paramedic*                                                 | 7,958   |
| 31                  | TI optometr* OR AB optometr*                                                   | 3,584   |
| 32                  | OR/24-31                                                                       | 533,864 |
| 33                  | 23 AND 32                                                                      | 12,932  |
| 34                  | TI nurs* N1 prescrib* OR AB nurs* N1 prescrib*                                 | 1,054   |
| 35                  | TI pharmacist* N1 prescrib* OR AB pharmacist* N1 prescrib*                     | 751     |
| 36                  | TI physiotherap* N1 prescrib* OR AB physiotherap* N1 prescrib*                 | 105     |
| 37                  | TI paramedic* N1 prescrib* OR AB paramedic* N1 prescrib*                       | 4       |
| 38                  | TI podiatr* N1 prescrib* OR AB podiatr* N1 prescrib*                           | 15      |
| 39                  | TI chiropod* N1 prescrib* OR AB chiropod* N1 prescrib*                         | 2       |
| 40                  | TI dietician* N1 prescrib* OR AB dietician* N1 prescrib*                       | 18      |
| 41                  | TI dietitian* N1 prescrib* OR AB dietitian* N1 prescrib*                       | 3       |
| 42                  | TI radiograph* N1 prescrib* OR AB radiograph* N1 prescrib*                     | 61      |
| 43                  | TI optometr* N1 prescrib* OR AB optometr*N1 prescrib*                          | 14      |
| 44                  | OR/34-43                                                                       | 1,985   |
| 45                  | 33 OR 44                                                                       | 12,993  |
| 46                  | 19 AND 45                                                                      | 2,417   |
| 47                  | LIMITS Full Text, Published 20100101-20201231, Peer-reviewed, English language | 1,298   |

Supplementary\_File\_2

## Supplementary File 2. Study characteristics (n=22)

| Author(s), date              | Study aims, focus and/or research question                                                                                                                                                                                                                                                   | Setting, country                                                           | Methodology and/or theoretical perspective                    | Methods, recruitment                                                                                                                                                                                          | Data analysis                                         | Eligible participants                                                 | Sample                                                           | Main Findings                                                                                                                                                                                                                                                                                                                                                                                                                 |
|------------------------------|----------------------------------------------------------------------------------------------------------------------------------------------------------------------------------------------------------------------------------------------------------------------------------------------|----------------------------------------------------------------------------|---------------------------------------------------------------|---------------------------------------------------------------------------------------------------------------------------------------------------------------------------------------------------------------|-------------------------------------------------------|-----------------------------------------------------------------------|------------------------------------------------------------------|-------------------------------------------------------------------------------------------------------------------------------------------------------------------------------------------------------------------------------------------------------------------------------------------------------------------------------------------------------------------------------------------------------------------------------|
| Afseth & Paterson (2017) [1] | To explore the views of NMP nursing students and DMPs on inter-professional competency assessment over course of training. To explore use of competency assessment as relates to development of prescribing competence.                                                                      | 1 HEI NMP programme provider, Edinburgh, Scotland.                         | Exploratory qualitative study.                                | Telephone semi-structured interviews (DMPs) and pre-post training focus group (NMP students).<br><br>Convenience sampling of students and DMPs from one 2013 NMP training cohort.                             | Thematic analysis using Clarks theoretical Framework. | 27 students (nurses)<br>27 DMP:                                       | 6 students<br>6 DMP.                                             | Inter-professional training approach ratified role of NMP with DMP and within wider team. DMP lacked clarity on their role in training and use of competency assessments. Confidence in transition affected by the amount of time DMP engaged with and supported NMPs post qualification.                                                                                                                                     |
| Boreham et al (2013) [2]     | How effective are NMP programmes in preparing nurses for prescribing roles? What do students feel are the most and least effective aspects of the programme? How could the provision be improved? What problems do programme leads encounter in bringing nurses up to the required standard? | 7 HEIs delivering 7 NMP training programmes at 10 centres across Scotland. | Evaluative mixed methods. Survey, interviews and focus group. | Survey, semi-structured interviews (programme leads) and focus group (NMP students) using nominal group technique.<br><br>Convenience sampling of students and programme leads from one 2011 training cohort. | Thematic analysis using nominal group technique.      | 192 students (nurses, midwives, health visitors), 10 programme leads. | Interviews n=10<br>programme leads<br>Focus groups n=87 students | Generic training model helped contextualise NMP across services/settings for students; however, barriers including lack of study leave, protected time/backfill limited study time. DMP input often inadequate. Prior educational experiences influenced pedagogical preferences. Balance between professional duties, life and course commitments challenging. Unclear whether barriers specific to different care contexts. |
| Bowskill et al (2014) [3]    | To describe uptake and use of a mentor scheme from                                                                                                                                                                                                                                           | 1 HEI NMP training provider,                                               | Exploratory mixed methods.                                    | Surveys, semi-structured interviews.                                                                                                                                                                          | Content analysis.                                     | 74 students (professions unspecified)                                 | 6 students<br>3 mentors                                          | NMP students found programme academically challenging with                                                                                                                                                                                                                                                                                                                                                                    |

## Supplementary\_File\_2

|                           |                                                                                                                                             |                                                                                                           |                                                      |                                                                                                                                  |                    |                              |                                                             |                                                                                                                                                                                                                                                                                                                                                                                                  |
|---------------------------|---------------------------------------------------------------------------------------------------------------------------------------------|-----------------------------------------------------------------------------------------------------------|------------------------------------------------------|----------------------------------------------------------------------------------------------------------------------------------|--------------------|------------------------------|-------------------------------------------------------------|--------------------------------------------------------------------------------------------------------------------------------------------------------------------------------------------------------------------------------------------------------------------------------------------------------------------------------------------------------------------------------------------------|
|                           | perspectives of student NMPs and mentors. To understand students' and mentors motivation for and experience of participating in the scheme. | Nottingham, England                                                                                       | Surveys and semi-structured interviews.              | Convenience sampling of students from 2010 and 2011 training cohorts and former students from 2006-2010 cohorts.                 |                    | 49 mentors.                  |                                                             | variable/no access to backfill arrangements. Academic challenges of courses detracted focus from integrating, or contextualising knowledge into practice. Transition highlighted as alternative/more optimal time point for mentoring.                                                                                                                                                           |
| Brodie et al (2014) [4]   | To explore values and attitudes of NMPs to engagement in benzodiazepine prescribing.                                                        | General practices, community mental health and retail services in 1 health board, in semi-rural Scotland. | Exploratory qualitative interviews study.            | Semi-structured interviews.<br><br>Purposive sampling of IPs in PC roles; identified by NMP clinical nurse lead in health board. | Thematic analysis. | 56 nurse and pharmacist IPs. | 4 pharmacist IPs<br>4 nurse IPs<br><br>(2 not prescribing). | NMP enhanced holistic care but practitioners concerned prescribing roles were underutilised. Role development impeded by barriers at service delivery and practitioner development/ support levels. Lack of targets for mental health considered to impede funding/ commissioning of NMP roles.                                                                                                  |
| Cole & Gillett (2015) [5] | To explore prescribing practices of palliative care clinical specialist nurse IPs and investigate why they are not prescribing.             | 1 hospice providing community palliative care, south east England.                                        | Mixed methods service audit. Survey and focus group. | Survey and focus group.<br><br>Convenience sampling of palliative care clinical specialist nurse IPs.                            | Thematic analysis. | 10 nurse IPs.                | 6 nurse IPs                                                 | Audit identified underutilisation of NMP; focus groups identified barriers including lack of clarity on local policies, protocols and governance systems for INMP, poor awareness of NMP within teams and unclear clinical/service remit for NMP impeded prescribing. Low confidence in early transition highlighted and related to inconsistent DMP input and lack of medical and peer support. |



## Supplementary\_File\_2

|                            |                                                                                                                                                                                                                                                           |                                                                                                                |                                                                                                                                          |                                                                                                                                                                                              |                                                                            |                                                                                                  |                                |                                                                                                                                                                                                                                                                            |
|----------------------------|-----------------------------------------------------------------------------------------------------------------------------------------------------------------------------------------------------------------------------------------------------------|----------------------------------------------------------------------------------------------------------------|------------------------------------------------------------------------------------------------------------------------------------------|----------------------------------------------------------------------------------------------------------------------------------------------------------------------------------------------|----------------------------------------------------------------------------|--------------------------------------------------------------------------------------------------|--------------------------------|----------------------------------------------------------------------------------------------------------------------------------------------------------------------------------------------------------------------------------------------------------------------------|
| Courtenay et al (2010) [6] | To explore views of diabetic patients on nurse prescribing and perceived advantages and disadvantages                                                                                                                                                     | 7 community clinic and general practice sites across England.                                                  | Exploratory qualitative interview study.                                                                                                 | Semi-structured interviews.<br><br>Purposive sampling of diabetes nurse prescribers via diabetes prescriber network, purposive random sampling of patients receiving prescribed medicines.   | Thematic analysis.                                                         | Size of target population unspecified.                                                           | 7 nurse IP<br>41 patients      | Patients were confident in nurse prescribing and reported improved service efficiency. Patients had clear expectations for specialist skills, knowledge and teamwork, but were divided on the level of autonomy nurses should enact.                                       |
| Courtenay et al (2017) [7] | To explore patient expectations and experiences of nurse and pharmacist IP-led management of respiratory tract infections.                                                                                                                                | General practice and community clinics (number unspecified) in England, Scotland and Wales.                    | Mixed-methods: survey and interviews.                                                                                                    | Survey, semi-structured interviews.<br><br>Convenience sampling of patients presenting to nurse IP with respiratory tract infections in primary care.                                        | Thematic analysis.                                                         | 32 non-medical prescribers in one health board, CCG and primary care based graduates of one HEI. | 16 nurse IP<br>22 patients     | Patients were confident in nurse antibiotic prescribing but had clear expectations for physical examination, specialist knowledge, information provision, good communication skills and unrestricted consultation time.                                                    |
| Courtenay et al (2019)     | To use a theoretical framework to identify factors influencing management of respiratory tract infections. To identify behaviour change techniques for development of a theoretically informed intervention to support appropriate prescribing behaviour. | 14 General practices, 14 out-of-hours/unscheduled care services, 2 intermediate care services, 1 missing data. | Theory-driven explanatory interview study using Capability, Opportunity and Motivation for Behaviour and Theoretical Domains Frameworks. | Semi-structured interviews.<br><br>Opportunistic sampling of primary care nurse and pharmacist IPs responsible for managing patients with respiratory tract infections recruited nationally. | Thematic analysis followed by mapping of themes to theoretical frameworks. | Size of target population unknown.                                                               | 17 nurse IP<br>4 pharmacist IP | Antibiotic prescribing dependent on training, knowledge/skills, guideline provision, local peer benchmarked audit, consultation skills and role identity. Barriers included time pressures, lack of confidence, negative peer advice, fear of liability, patient pressure. |

## Supplementary\_File\_2

|                               |                                                                                                                                                                        |                                                      |                                          |                                                                                                                                                                                 |                                      |                                        |                                                                                                                   |                                                                                                                                                                                                                                                                                                                                  |
|-------------------------------|------------------------------------------------------------------------------------------------------------------------------------------------------------------------|------------------------------------------------------|------------------------------------------|---------------------------------------------------------------------------------------------------------------------------------------------------------------------------------|--------------------------------------|----------------------------------------|-------------------------------------------------------------------------------------------------------------------|----------------------------------------------------------------------------------------------------------------------------------------------------------------------------------------------------------------------------------------------------------------------------------------------------------------------------------|
| Cousins & Donnell (2012) [8]  | To investigate full impact of becoming an IP on nurse practitioner roles in general practice. To explore whether the IP increased work-related stress.                 | 1 PCT, Liverpool, England.                           | Exploratory qualitative interview study. | Semi-structured interviews.<br><br>Purposive sampling of nurse practitioner IPs in general practice $\geq$ 3 years IP experience.                                               | Content analysis.                    | Size of target population unspecified. | 6 nurse IP                                                                                                        | NMP enhanced job satisfaction but service demand and work-related stress increased. Lack of remuneration perceived to disincentivise practitioners. Barriers at service delivery and practitioner development/support levels impeded full development of NMP roles.                                                              |
| Daughtry & Hayter (2010) [9]  | To explore impact of prescribing on the role of a practice nurse. To explore the experiences and feelings of practice nurses actively prescribing in general practice. | 3 GP practices in 1 PCT in north west, England.      | Descriptive qualitative interview study. | Semi-structured interviews.<br><br>Purposive sampling of practice nurse IP in general practice.                                                                                 | Thematic analysis (Colaizzi method). | Size of target population unspecified. | 4 nurse practitioner IP, 3 practice nurse IP, 1 nurse manager IP.<br><br>Median 3 (0.6–5.0) years' experience IP. | NMP expanded nurses' roles, but medical opposition impeded development in some practices (e.g., minor illness/triage), and skills were underutilised. Lack of role clarity led to misunderstanding amongst practice staff about NMP remit within services. Workload pressures increased from transfer of GP caseloads to nurses. |
| Dhalivaal (2011) [10]         | To explore patients' attitudes to and experiences of nurse prescribing in inner-city general practices within different ethnic populations.                            | 4 inner city general practices, Birmingham, England. | Descriptive qualitative interview study. | Semi-structured interviews using grand tour question.<br><br>Convenience sampling of adult patients prescribed medication by a nurse prescriber; selected by nurse prescribers. | Thematic analysis.                   | Size of target population unspecified. | 4 nurse IP<br>15 patients.                                                                                        | Patients satisfied with nurse NMP; clear expectations expressed for specialist knowledge and inter-personal and communication skills.                                                                                                                                                                                            |
| Downer & Shepherd (2010) [11] | To explore experiences of district nurses currently                                                                                                                    | Community services, 2                                | Heideggerian phenomenological            | Conversational semi-structured interviews.                                                                                                                                      | Thematic analysis                    | Size of target population unspecified. | 8 nurse IP                                                                                                        | NMP enhanced service access and increased job satisfaction. Challenges                                                                                                                                                                                                                                                           |

## Supplementary\_File\_2

|                            |                                                                                                                                                                                             |                                                                   |                                                       |                                                                                                                                                                        |                              |                                                             |                                                                     |                                                                                                                                                                                                                                                                                                                                                        |
|----------------------------|---------------------------------------------------------------------------------------------------------------------------------------------------------------------------------------------|-------------------------------------------------------------------|-------------------------------------------------------|------------------------------------------------------------------------------------------------------------------------------------------------------------------------|------------------------------|-------------------------------------------------------------|---------------------------------------------------------------------|--------------------------------------------------------------------------------------------------------------------------------------------------------------------------------------------------------------------------------------------------------------------------------------------------------------------------------------------------------|
|                            | prescribing as nurse IP.                                                                                                                                                                    | health boards, west Scotland.                                     | exploratory study.                                    | Purposive sampling of district nurse IP with minimum 12 months IP experience and actively prescribing.                                                                 | (Colaizzi method).           |                                                             |                                                                     | included lack of support, lack of record access, increased workload in maintaining competence, lack of remuneration/ recognition. Support lacking in transition and beyond.                                                                                                                                                                            |
| Herklots et al (2015) [12] | To explore the prescribing experiences of community matron IP, including their prescribing practices and any influencing factors.                                                           | 2 inner city, rural and suburban PCTs, south east England.        | Exploratory qualitative interview study.              | Semi-structured interviews.<br><br>Purposive sampling of community matron IP managing long-term conditions.                                                            | Thematic analysis.           | Size of target population unspecified.                      | 7 nurse IP                                                          | Knowledge/skills from NMP training enhanced holistic care. However, nurses prescribed limited formulary and scope of prescribing practice did not develop. No consensus reached on whether local prescribing arrangements impeded NMP; nurses developed strategies to overcome potential barriers of lack of support/ supervision, CPD, GP confidence. |
| Holden et al (2017)[13]    | To explore how UK physiotherapists address analgesic use among patients with hip osteoarthritis, and to explore their beliefs about the acceptability of prescribing for these individuals. | UK NHS and non-NHS primary care sites (settings unspecified).     | Mixed methods, Survey and semi-structured interviews. | Telephone semi-structured interviews.<br><br>Maximum variation purposive sampling based on gender, clinical experience, care setting, self-report analgesia approach.. | Constant comparative method. | 3126 physiotherapists                                       | 1646 survey, 20 non-IP physiotherapists, 1 physiotherapist IP.      | Main (hypothetical) drivers for IP identified as patient convenience and reduction in GP workload; survey showed low adoption rate (1%, n=9). Barriers to uptake included lack of service advantage, remuneration and employer support, liability and burden of training concerns.                                                                     |
| Inch et al (2019) [14]     | To test feasibility of recruitment, data collection processes, suitability of outcome measures and retention rates in care                                                                  | 4 residential care homes with affiliated GP practices in Grampian | Mixed methods feasibility study. Semi-structured      | Semi-structured interviews and focus group.<br><br>Random and purposive                                                                                                | Thematic analysis.           | 346 GPs<br>14 pharmacist IP<br>86 residents<br>6 care homes | Interviews n=32<br>4 pharmacist IP<br>6 GPs<br>6 care home managers | NMP increased medicines access, safety and efficiency. Offloaded care home staff and GPs. Facilitated by GP practice computer access,                                                                                                                                                                                                                  |

## Supplementary\_File\_2

|                         |                                                                                                                                                                                                                                                             |                                                                                                  |                                                                                       |                                                                                                                                                                                                                                                                                                            |                                                         |                                        |                                                                                                                                                                                                            |                                                                                                                                                                                                                                                                                                                                                                                                                                                        |
|-------------------------|-------------------------------------------------------------------------------------------------------------------------------------------------------------------------------------------------------------------------------------------------------------|--------------------------------------------------------------------------------------------------|---------------------------------------------------------------------------------------|------------------------------------------------------------------------------------------------------------------------------------------------------------------------------------------------------------------------------------------------------------------------------------------------------------|---------------------------------------------------------|----------------------------------------|------------------------------------------------------------------------------------------------------------------------------------------------------------------------------------------------------------|--------------------------------------------------------------------------------------------------------------------------------------------------------------------------------------------------------------------------------------------------------------------------------------------------------------------------------------------------------------------------------------------------------------------------------------------------------|
|                         | homes and general practices. To assess service and research acceptability to care home residents, pharmacist IP, GPs and care home staff. To refine service specification.                                                                                  | (Scotland), Belfast (Northern Ireland), Norfolk and Yorkshire (England).                         | interviews and focus group.                                                           | sampling using multiple methods.                                                                                                                                                                                                                                                                           |                                                         |                                        | 10 care home staff<br>2 residents<br>3 relatives<br>1 dietician<br>Focus groups (n=2)<br>2 pharmacists                                                                                                     | pharmacy knowledge, autonomy and ability to prescribe, good communication and knowledge transfer. Lack of established relationship with GP barrier.                                                                                                                                                                                                                                                                                                    |
| Kelly et al (2010) [15] | To identify number of practice nurses in one county qualified as nurse IP and number intending adoption. To identify number of practice nurses providing first-contact care for minor illnesses, long term conditions. To identify barriers to adoption IP. | GP practices in 1 county in southern England.                                                    | Descriptive qualitative survey.                                                       | Questionnaire with free text questions.<br><br>Convenience sampling of GP practice nurses managing long term conditions and/or minor illnesses.                                                                                                                                                            | Descriptive analysis.                                   | 251 practice nurses.                   | 31 nurse IP<br>120 nurse non-IP                                                                                                                                                                            | Barriers included lack of funding and/or backfill, lack of managerial support, poor knowledge/ information on training and application processes, reluctance to engage in further advanced training, education, lack of remuneration and concern over responsibility and liability.                                                                                                                                                                    |
| Lane et al (2020) [16]  | To explore stakeholder views on issues and barriers to pharmacist IP and inform service specification for a pharmacist IP intervention in older people's care homes.                                                                                        | 4 residential care homes with affiliated GP practices in England, Scotland and Northern Ireland. | Theory-driven exploratory phenomenological study using Theoretical Domains Framework. | Semi-structured interviews and stakeholder specific focus groups. Topic guide informed by Theoretical Domains Framework.<br><br>Purposive maximum variation sampling of stakeholders living or working in care homes via local professional networks, regulatory bodies, local primary care networks, Care | Framework analysis using Theoretical Domains Framework. | Size of target population unspecified. | <u>Focus groups (n=72)</u><br>25 pharmacists<br>24 GPs<br>9 care home managers/staff<br>7 residents<br>7 relatives<br><br><u>Interviews (n=13)</u><br>2 pharmacists<br>5 GPs<br>3 care home managers/staff | Consensus that pharmacist IP model appropriate to address limitations of GP workload and improve care-home prescribing efficiency. Hypothetical barriers identified in role remit and clarity, communication channels for integrated teamwork, team understanding of roles, pharmacist knowledge of LTC management/ care home systems/service pathways, resident preference for GP medicines consultations. GPs and pharmacists had reservations about |

## Supplementary\_File\_2

|                                           |                                                                                                                                                                                          |                                                                                               |                                                          |                                                                                                                                                                                   |                              |                                        |                                |                                                                                                                                                                                                                                                                                                                                                                     |
|-------------------------------------------|------------------------------------------------------------------------------------------------------------------------------------------------------------------------------------------|-----------------------------------------------------------------------------------------------|----------------------------------------------------------|-----------------------------------------------------------------------------------------------------------------------------------------------------------------------------------|------------------------------|----------------------------------------|--------------------------------|---------------------------------------------------------------------------------------------------------------------------------------------------------------------------------------------------------------------------------------------------------------------------------------------------------------------------------------------------------------------|
|                                           |                                                                                                                                                                                          |                                                                                               |                                                          | Quality Commission.                                                                                                                                                               |                              |                                        |                                | IP making independent diagnoses.                                                                                                                                                                                                                                                                                                                                    |
| Latham & Nyatanga (2018a, 2018b).[17, 18] | To explore the lived experiences of clinical nurse specialists who work as IP with palliative care patients within community settings.                                                   | 13 hospices across West Midlands, England.                                                    | Interpretive phenomenological interview study.           | Semi-structured interviews.<br><br>Maximum variation purposive sampling of clinical nurse specialist IP to limit geographical bias.                                               | Constant comparative method. | Size of target population unspecified. | 6 nurse IP                     | NMP promoted timely access to medicines, but service improvements not realised for all patients because of unmet training needs and failure to develop scope of practice in non-cancer palliative care. Negative attitudes of stakeholders to NMP could impede prescribing. Transition highlighted as time of greater anxiety, and target for implementing support. |
| Maddox et al (2016) [19]                  | To explore factors influencing how nurse and pharmacist IP working in community and primary care settings choose whether or not to take responsibility for making prescribing decisions. | 11 general practices<br>11 community<br>3 nursing homes,<br>5 unspecified settings in England | Exploratory qualitative interview and focus group study. | In person/ telephone semistructured interviews focus groups using critical incident technique.<br><br>Purposive and snowball sampling of nurse and pharmacist IP in primary care. | Thematic analysis.           | Size of target population unspecified. | 25 nurse IP<br>5 pharmacist IP | Need for greater organisational clarity on remit for NMP within services identified. Transition post training highlighted as key point lacking supervision and support. Confidence and competence impeded by lack of NMP role clarity, organisational agreement for use of NMP and lack of inter-professional collaboration.                                        |
| Stenner et al (2011) [20]                 | To explore nurse prescribing from perspective of patients with diabetes. Main objective to explore patients' views about consultations with a nurse prescriber and any impact on         | 7 community clinic and general practice sites across England.                                 | Exploratory qualitative interview study.                 | Semi-structured interviews.<br><br>Convenience sampling of diabetes nurse prescribers via diabetes prescriber network, patients                                                   | Thematic analysis.           | Size of target population unspecified. | 7 nurse IP<br>41 patients      | Patients were confident in nurse IP and identified benefits including improved disease management, service access, information provision and consultation time. Patients had clear expectations for specialist skills,                                                                                                                                              |

## Supplementary\_File\_2

|                           |                                                                                                                                                                                                                                                                                                      |                                                                                                                                        |                                                                                                                      |                                                                                                                                                                                       |                              |                                                                                              |                                       |                                                                                                                                                                                                                                                                                                                                                                                                   |
|---------------------------|------------------------------------------------------------------------------------------------------------------------------------------------------------------------------------------------------------------------------------------------------------------------------------------------------|----------------------------------------------------------------------------------------------------------------------------------------|----------------------------------------------------------------------------------------------------------------------|---------------------------------------------------------------------------------------------------------------------------------------------------------------------------------------|------------------------------|----------------------------------------------------------------------------------------------|---------------------------------------|---------------------------------------------------------------------------------------------------------------------------------------------------------------------------------------------------------------------------------------------------------------------------------------------------------------------------------------------------------------------------------------------------|
|                           | medications management.                                                                                                                                                                                                                                                                              |                                                                                                                                        |                                                                                                                      | recruited by nurse prescribers.                                                                                                                                                       |                              |                                                                                              |                                       | communication skills, knowledge and teamwork.                                                                                                                                                                                                                                                                                                                                                     |
| Weiss et al (2016) [21]   | To explore group identities of GPs, nurses and pharmacists as IPs. To describe social identities of GPs, nurses and pharmacists as IPs, and extent to which identities are expressed and accepted.                                                                                                   | General practices (n, unspecified) in PCTS in southern and central England and Wales; with and without employed nurse/ pharmacist IPs. | Exploratory qualitative interview study using social identity theory and social identity self-categorisation theory. | Semi-structured interviews.<br><br>Maximum variation purposive sampling; surgery size, geographical location, practice area deprivation, gender and age.                              | Constant comparative method. | n=51<br>21 GP<br>19 nurse IP<br>12 pharmacist IP<br>From 36 GP practices in 14 PCTs.         | 7 GP<br>7 nurse IP<br>7 pharmacist IP | Support, teamwork, social role identity and clarity facilitated integration of IP. Competence development impeded by lack of NMP role clarity, organisational agreement for use of NMP and lack of inter-professional collaboration.                                                                                                                                                              |
| Williams et al (2018)[22] | To identify GP and nurse IP experiences of prescribing antibiotics for respiratory tract infections in out-of-hours primary care, to explore facilitators and barriers to reducing antibiotic prescribing; and to identify similarities and differences between GP and nurse antibiotic prescribing. | Primary care out-of-hours services in England accessed by NHS 111 and walk-in-services (number unspecified)                            | Exploratory qualitative interview study.                                                                             | Semi-structured interviews.<br><br>Maximum variation purposive and snowball sampling for urban and rural settings, organisation type, clinical experience, cross-organisational role. | Constant comparative method. | n=1253 from professional associations, research network, NHS trust, mailout and snowballing. | n=30<br>15 GP<br>15 nurse IP          | Nurse IP reported barriers to antibiotic prescribing including patient expectation, patient lack of trust in no prescribing decisions, lack of feedback on delayed prescriptions, inconsistent prescribing decisions between team members, lack of clinical record access, time constraints, staff turnover. Facilitators included peer discussion and education, patient information strategies. |

CCG – Clinical Commissioning Group, DMP – designated medical practitioner, GP – general practitioner, HEI – higher education institute, IP – independent prescribing, LTC – long term conditions, NHS – National Health service, NMP – non-medical prescribing, PCT – Primary Care Trust

## References

1. Afseth, J.D. and R.E. Paterson, *The views of non-medical prescribing students and medical mentors on interprofessional competency assessment – A qualitative exploration*. Nurse Educ Today, 2017. **52**: p. 103-108.

## Supplementary\_File\_2

2. Boreham, N., et al., *Education programmes preparing independent prescribers in Scotland: an evaluation*. Nurse Educ Today, 2013. **33**(4): p. 321-326.
3. Bowskill, D., O. Meade, and J.S. Lymn, *Use and evaluation of a mentoring scheme to promote integration of non-medical prescribing in a clinical context*. BMC Med Educ, 2014. **14**: p. 177.
4. Brodie, L., J. Donaldson, and S. Watt, *Non-medical prescribers and benzodiazepines: A qualitative study*. Nurse Prescribing, 2014. **12**(7): p. 353-359.
5. Cole, T. and K. Gillett, *Are nurse prescribers issuing prescriptions in palliative care?* Nurse Prescribing, 2015. **13**(2): p. 98-102.
6. Courtenay, M., K. Stenner, and N. Carey, *The views of patients with diabetes about nurse prescribing*. Diabet Med, 2010. **27**(9): p. 1049-1054.
7. Courtenay, M., et al., *Antibiotics for acute respiratory tract infections: a mixed-methods study of patient experiences of non-medical prescriber management*. BMJ Open, 2017. **7**(3): p. e013515-e013515.
8. Cousins, R. and C. Donnell, *Nurse prescribing in general practice: a qualitative study of job satisfaction and work-related stress*. Fam Pract, 2012. **29**(2): p. 223-227.
9. Daughtry, J. and M. Hayter, *A qualitative study of practice nurses' prescribing experiences*. Practice Nursing, 2010. **21**(6): p. 310-314.
10. Dhalivaal, J., *Patients' perspectives on prescribing by nurses in general practice*. Practice Nursing, 2011. **22**(1): p. 41-46.
11. Downer, F. and C.K. Shepherd, *District nurses prescribing as nurse independent prescribers*. Br J Community Nurs, 2010. **15**(7): p. 348-352.
12. Herklots, A., A. Baileff, and S. Latter, *Community matrons' experience as independent prescribers*. Br J Community Nurs, 2015. **20**(5): p. 217.
13. Holden, M.A., et al., *A mixed methods exploration of physiotherapist's approaches to analgesic use among patients with hip osteoarthritis*. Physiotherapy, 2019. **105**(3): p. 328-337.
14. Inch, J., et al., *The Care Home Independent Prescribing Pharmacist Study (CHIPPS) - a non-randomised feasibility study of independent pharmacist prescribing in care homes*. Pilot Feasibility Stud, 2019. **5**: p. 89.
15. Kelly, A., J. Neale, and R. Rollings, *Barriers to extended nurse prescribing among practice nurses*. Community Pract, 2010. **83**(1): p. 21-24.
16. Lane, K., et al., *"Everyone needs to understand each other's systems": Stakeholder views on the acceptability and viability of a Pharmacist Independent Prescriber role in care homes for older people in the UK*. Health Soc Care Community, 2020. **28**(5): p. 1479-1487.
17. Latham, K. and B. Nyatanga, *Community palliative care clinical nurse specialists as independent prescribers: part 2*. Br J Community Nurs, 2018. **23**(3): p. 126-133.
18. Latham, K. and B. Nyatanga, *Community palliative care clinical nurse specialists as independent prescribers: part 1*. Br J Community Nurs, 2018. **23**(2): p. 94-98.
19. Maddox, C., et al., *Factors influencing nurse and pharmacist willingness to take or not take responsibility for non-medical prescribing*. Res Social Adm Pharm, 2016. **12**(1): p. 41-55.
20. Stenner, K.L., M. Courtenay, and N. Carey, *Consultations between nurse prescribers and patients with diabetes in primary care: A qualitative study of patient views*. Int J Nurs Stud, 2011. **48**(1): p. 37-46.
21. Weiss, M.C., et al., *GPs, nurses and pharmacists as prescribers in primary care: an exploration using the social identity approach / Hausärzte/-innen, Diplomierte Pflegefachpersonen und Apotheker/-innen als Arzneimittelverschreiber/-innen: eine Exploration mit dem Ansatz der Sozialen Identität*. Int J Health Prof, 2016. **3**(2): p. 153-164.
22. Williams, S.J., et al., *General practitioner and nurse prescriber experiences of prescribing antibiotics for respiratory tract infections in UK primary care out-of-hours services (the UNITE study)*. J Antimicrob Chemother, 2018. **73**(3): p. 795-803.

Supplementary\_File\_3

## Supplementary File 3. Quality Assessment Tool for Studies with Diverse Designs (QATSDD) quality scores

|                                                                                        | Afseth & Paterson 2017 [1] | Boreham 2013 [2] | Bowskill 2014 [3] | Brodie 2014 [4] | Cole & Gillett 2015 [5] | Courtenay 2010 [6] | Courtenay 2017 [7] | Courtenay 2019 [8] | Cousins & Donnell 2012 [9] | Daughtry & Hayter 2010 [10] | Dhalivaal 2011 [11] | Downer & Shepherd 2010 [12] | Herklots 2015 [13] | Holden 2019 [14] | Inch 2019 [15] | Kelly 2010 [16] | Lane 2020 [17] | Latham & Nyatanga 2018a,b [18, 19] | Maddox 2016 [20] | Stenner 2011 [21] | Weiss 2016 [22] | Williams 2018 [23] |
|----------------------------------------------------------------------------------------|----------------------------|------------------|-------------------|-----------------|-------------------------|--------------------|--------------------|--------------------|----------------------------|-----------------------------|---------------------|-----------------------------|--------------------|------------------|----------------|-----------------|----------------|------------------------------------|------------------|-------------------|-----------------|--------------------|
| Explicit theoretical framework                                                         | 3                          | 1                | 0                 | 0               | 0                       | 1                  | 0                  | 3                  | 1                          | 0                           | 0                   | 3                           | 0                  | 3                | 0              | 0               | 3              | 3                                  | 0                | 0                 | 0               | 3                  |
| Statement of aims/ objectives in main body of report                                   | 3                          | 3                | 3                 | 2               | 3                       | 2                  | 3                  | 3                  | 2                          | 3                           | 2                   | 3                           | 3                  | 3                | 3              | 3               | 2              | 3                                  | 2                | 3                 | 3               | 3                  |
| Clear description of research setting                                                  | 3                          | 3                | 3                 | 2               | 2                       | 3                  | 2                  | 3                  | 3                          | 3                           | 2                   | 1                           | 2                  | 2                | 3              | 2               | 3              | 3                                  | 2                | 3                 | 3               | 2                  |
| Evidence of sample size considered in terms of analysis                                | 0                          | 0                | 0                 | 0               | 0                       | 0                  | 0                  | 2                  | 3                          | 0                           | 3                   | 0                           | 1                  | 3                | 3              | 1               | 1              | 2                                  | 3                | 0                 | 0               | 0                  |
| Representative sample of target group of a reasonable size                             | 2                          | 3                | 3                 | 2               | 3                       | 3                  | 3                  | 2                  | 3                          | 1                           | 2                   | 0                           | 1                  | 3                | 3              | 3               | 3              | 1                                  | 3                | 3                 | 3               | 3                  |
| Description of procedure for data collection                                           | 3                          | 3                | 3                 | 2               | 1                       | 2                  | 2                  | 3                  | 3                          | 2                           | 2                   | 2                           | 2                  | 3                | 1              | 1               | 3              | 3                                  | 3                | 3                 | 3               | 2                  |
| Rationale for choice of data collection tool(s)                                        | 2                          | 2                | 0                 | 0               | 0                       | 0                  | 2                  | 3                  | 1                          | 0                           | 2                   | 3                           | 0                  | 2                | 0              | 0               | 3              | 3                                  | 2                | 0                 | 0               | 0                  |
| Detailed recruitment data                                                              | 2                          | 2                | 3                 | 1               | 2                       | 3                  | 2                  | 3                  | 2                          | 2                           | 3                   | 1                           | 2                  | 3                | 3              | 2               | 3              | 3                                  | 3                | 3                 | 3               | 3                  |
| Statistical assessment of reliability & validity of measurement tool(s) (Quan)         | n/a                        | 0                | 2                 | n/a             | 0                       | n/a                | 0                  | n/a                | n/a                        | n/a                         | n/a                 | n/a                         | n/a                | 2                | 0              | 0               | n/a            | n/a                                | n/a              | n/a               | n/a             | n/a                |
| Fit between stated research question & method of data collection (Quan)                | n/a                        | 3                | 3                 | n/a             | 1                       | n/a                | 2                  | n/a                | n/a                        | n/a                         | n/a                 | n/a                         | n/a                | 3                | 3              | 0               | n/a            | n/a                                | n/a              | n/a               | n/a             | n/a                |
| Fit between stated research question & format & content of data collection tool (Qual) | 1                          | 3                | 2                 | 2               | 1                       | 0                  | 3                  | 3                  | 0                          | 0                           | 2                   | 0                           | 0                  | 2                | 1              | 0               | 3              | 1                                  | 1                | 0                 | 3               | 2                  |
| Fit between research question & method of analysis                                     | 3                          | 3                | 3                 | 2               | 1                       | 3                  | 3                  | 3                  | 3                          | 3                           | 0                   | 3                           | 3                  | 3                | 1              | 2               | 3              | 3                                  | 3                | 3                 | 3               | 3                  |
| Good justification for analytical method selected                                      | 1                          | 2                | 0                 | 1               | 0                       | 0                  | 2                  | 2                  | 0                          | 0                           | 0                   | 3                           | 2                  | 2                | 0              | 0               | 2              | 3                                  | 1                | 0                 | 0               | 2                  |
| Assessment of reliability of analytical process (Qual)                                 | 0                          | 2                | 0                 | 1               | 0                       | 3                  | 2                  | 0                  | 3                          | 0                           | 0                   | 0                           | 0                  | 0                | 0              | 0               | 0              | 0                                  | 3                | 3                 | 0               | 3                  |
| Evidence of user involvement in design                                                 | 3                          | 2                | 2                 | 0               | 0                       | 0                  | 3                  | 1                  | 0                          | 0                           | 0                   | 0                           | 0                  | 0                | 3              | 2               | 2              | 0                                  | 1                | 0                 | 0               | 3                  |
| Strengths & limitations critically discussed                                           | 2                          | 0                | 2                 | 1               | 0                       | 1                  | 3                  | 3                  | 1                          | 1                           | 0                   | 1                           | 2                  | 2                | 2              | 0               | 3              | 2                                  | 3                | 2                 | 1               | 3                  |
| <b>Total</b>                                                                           | <b>28</b>                  | <b>32</b>        | <b>29</b>         | <b>16</b>       | <b>14</b>               | <b>21</b>          | <b>32</b>          | <b>33</b>          | <b>25</b>                  | <b>15</b>                   | <b>18</b>           | <b>20</b>                   | <b>18</b>          | <b>36</b>        | <b>26</b>      | <b>16</b>       | <b>33</b>      | <b>30</b>                          | <b>30</b>        | <b>23</b>         | <b>22</b>       | <b>32</b>          |



Supplementary\_File\_3

|                           |    |    |    |    |    |    |    |    |    |    |    |    |    |    |    |    |    |    |    |    |    |    |
|---------------------------|----|----|----|----|----|----|----|----|----|----|----|----|----|----|----|----|----|----|----|----|----|----|
| <b>Max score possible</b> | 42 | 48 | 48 | 42 | 48 | 42 | 48 | 42 | 42 | 42 | 42 | 42 | 42 | 48 | 48 | 48 | 42 | 42 | 42 | 42 | 42 | 42 |
| <b>Score as %</b>         | 67 | 67 | 60 | 38 | 29 | 50 | 67 | 78 | 59 | 36 | 43 | 48 | 43 | 75 | 54 | 33 | 78 | 71 | 71 | 55 | 52 | 76 |

1. Afseth, J.D. and R.E. Paterson, *The views of non-medical prescribing students and medical mentors on interprofessional competency assessment – A qualitative exploration*. Nurse Educ Today, 2017. **52**: p. 103-108.
2. Boreham, N., et al., *Education programmes preparing independent prescribers in Scotland: an evaluation*. Nurse Educ Today, 2013. **33**(4): p. 321-326.
3. Bowskill, D., O. Meade, and J.S. Lymn, *Use and evaluation of a mentoring scheme to promote integration of non-medical prescribing in a clinical context*. BMC Med Educ, 2014. **14**: p. 177.
4. Brodie, L., J. Donaldson, and S. Watt, *Non-medical prescribers and benzodiazepines: A qualitative study*. Nurse Prescribing, 2014. **12**(7): p. 353-359.
5. Cole, T. and K. Gillett, *Are nurse prescribers issuing prescriptions in palliative care?* Nurse Prescribing, 2015. **13**(2): p. 98-102.
6. Courtenay, M., K. Stenner, and N. Carey, *The views of patients with diabetes about nurse prescribing*. Diabet Med, 2010. **27**(9): p. 1049-1054.
7. Courtenay, M., et al., *Antibiotics for acute respiratory tract infections: a mixed-methods study of patient experiences of non-medical prescriber management*. BMJ Open, 2017. **7**(3): p. e013515-e013515.
8. Courtenay, M., et al., *Examining influences on antibiotic prescribing by nurse and pharmacist prescribers: a qualitative study using the Theoretical Domains Framework and COM-B*. BMJ Open, 2019. **9**(6): p. e029177.
9. Cousins, R. and C. Donnell, *Nurse prescribing in general practice: a qualitative study of job satisfaction and work-related stress*. Fam Pract, 2012. **29**(2): p. 223-227.
10. Daughtry, J. and M. Hayter, *A qualitative study of practice nurses' prescribing experiences*. Practice Nursing, 2010. **21**(6): p. 310-314.
11. Dhalivaal, J., *Patients' perspectives on prescribing by nurses in general practice*. Practice Nursing, 2011. **22**(1): p. 41-46.
12. Downer, F. and C.K. Shepherd, *District nurses prescribing as nurse independent prescribers*. Br J Community Nurs, 2010. **15**(7): p. 348-352.
13. Herklots, A., A. Baileff, and S. Latter, *Community matrons' experience as independent prescribers*. Br J Community Nurs, 2015. **20**(5): p. 217.
14. Holden, M.A., et al., *A mixed methods exploration of physiotherapist's approaches to analgesic use among patients with hip osteoarthritis*. Physiotherapy, 2019. **105**(3): p. 328-337.
15. Inch, J., et al., *The Care Home Independent Prescribing Pharmacist Study (CHIPPS) - a non-randomised feasibility study of independent pharmacist prescribing in care homes*. Pilot Feasibility Stud, 2019. **5**: p. 89.
16. Kelly, A., J. Neale, and R. Rollings, *Barriers to extended nurse prescribing among practice nurses*. Community Pract, 2010. **83**(1): p. 21-24.
17. Lane, K., et al., *"Everyone needs to understand each other's systems": Stakeholder views on the acceptability and viability of a Pharmacist Independent Prescriber role in care homes for older people in the UK*. Health Soc Care Community, 2020. **28**(5): p. 1479-1487.
18. Latham, K. and B. Nyatanga, *Community palliative care clinical nurse specialists as independent prescribers: part 2*. Br J Community Nurs, 2018. **23**(3): p. 126-133.

## Supplementary\_File\_3

19. Latham, K. and B. Nyatanga, *Community palliative care clinical nurse specialists as independent prescribers: part 1*. Br J Community Nurs, 2018. **23**(2): p. 94-98.
20. Maddox, C., et al., *Factors influencing nurse and pharmacist willingness to take or not take responsibility for non-medical prescribing*. Res Social Adm Pharm, 2016. **12**(1): p. 41-55.
21. Stenner, K.L., M. Courtenay, and N. Carey, *Consultations between nurse prescribers and patients with diabetes in primary care: A qualitative study of patient views*. Int J Nurs Stud, 2011. **48**(1): p. 37-46.
22. Weiss, M.C., et al., *GPs, nurses and pharmacists as prescribers in primary care: an exploration using the social identity approach / Hausärzte/-innen, Diplomierte Pflegefachpersonen und Apotheker/-innen als Arzneimittelverschreiber/-innen: eine Exploration mit dem Ansatz der Sozialen Identität*. Int J Health Prof, 2016. **3**(2): p. 153-164.
23. Williams, S.J., et al., *General practitioner and nurse prescriber experiences of prescribing antibiotics for respiratory tract infections in UK primary care out-of-hours services (the UNITE study)*. J Antimicrob Chemother, 2018. **73**(3): p. 795-803.

## Supplementary\_File\_4

## Supplementary File 4. Study contribution to theme barriers and facilitators

| Analytical Theme                                            | Descriptive Theme                                        | Data theme                                    | Barrier                          | Facilitator                         |
|-------------------------------------------------------------|----------------------------------------------------------|-----------------------------------------------|----------------------------------|-------------------------------------|
| Analytical theme 1:<br>Optimising organisational readiness  | Theme 1.1: Clinical need and remit                       | Established clinical need                     | (1, 2)                           | (3-16)                              |
|                                                             |                                                          | Service gaps                                  | (1, 2)                           | (1, 2, 5, 7, 9, 10, 12, 13, 17, 18) |
|                                                             |                                                          | Role clarity                                  | (4, 7, 9, 11, 12, 14, 19)        | (8, 12, 14, 18, 19)                 |
|                                                             | Theme 1.2: Managerial leadership                         | Role of managers                              | (1, 2, 4, 7-9, 11, 12, 19-22)    | (14)                                |
|                                                             |                                                          | Recognising value                             | (1, 2, 4)                        | (4, 5, 7, 9, 11, 13, 17, 19, 22)    |
|                                                             |                                                          | Culture                                       | (7, 14)                          | (8-12, 14, 18, 19)                  |
|                                                             | Theme 1.3: Inter-professional environment                | Inter-professional relationships              | (2, 8, 12, 14)                   | (3, 8, 9, 11, 14, 19)               |
|                                                             |                                                          | Communication & collaboration                 | (8, 14)                          | (9, 10, 14, 18, 20)                 |
|                                                             | Analytical theme 2:<br>Optimising practitioner readiness | Theme 2.1: Selecting the right practitioners  | Selection                        | (20, 22)                            |
| Skills & aptitudes                                          |                                                          |                                               |                                  | (4-7, 11, 13, 15-18)                |
| Motivation & commitment                                     |                                                          |                                               | (1, 2, 7)                        |                                     |
| Theme 2.2: Preparing for training                           |                                                          | Expectations of training                      | (1-3, 20, 21)                    |                                     |
|                                                             |                                                          | Theme 2.3: Optimising and supporting training | Study leave                      | (2, 20, 21)                         |
| Mentoring                                                   |                                                          |                                               |                                  | (21)                                |
| Designated Medical Practitioners                            | (3)                                                      | (3, 22)                                       |                                  |                                     |
| Analytical theme 3:<br>Focusing on early transition support | Theme 3.1: Transition as a point of vulnerability        | Self-confidence                               | (6, 8, 9, 11, 12, 19, 21)        | (8, 11, 12)                         |
|                                                             | Theme 3.2: Nurturing confidence and competence           | Minimum competence                            | (8, 9, 12, 14, 21, 22)           | (7-9, 12, 14, 19)                   |
|                                                             |                                                          | Experience & exposure                         | (11)                             | (8, 11, 12, 14)                     |
| Theme 3.3: Transition support needs                         | Informal & formal support systems                        | (4, 6, 7, 9, 11, 12, 19, 22)                  | (4, 7, 9, 11, 12, 19, 22)        |                                     |
| Analytical theme 4:<br>Maximising and developing IP         | Theme 4.1: Service delivery                              | Impact on workload                            | (4, 6-9, 11, 12, 15, 16, 19, 22) | (4, 6-12, 18, 19, 22)               |
|                                                             | Theme 4.2: Developing and maximising roles               | Models of role development                    | (4, 9, 12, 14, 19, 22)           | (8, 10, 11, 14-16, 18)              |
|                                                             |                                                          | Continued professional development            | (4, 7, 9, 12, 15, 19)            | (6, 14)                             |
|                                                             |                                                          | Service evaluation                            | (22)                             | (6)                                 |

Supplementary\_File\_4

## References

1. Holden MA, Whittle R, Waterfield J, Chesterton L, Cottrell E, Quicke JG, et al. A mixed methods exploration of physiotherapist's approaches to analgesic use among patients with hip osteoarthritis. *Physiotherapy*. 2019;105(3):328-37.
2. Kelly A, Neale J, Rollings R. Barriers to extended nurse prescribing among practice nurses. *Community Practitioner*. 2010;83(1):21-4.
3. Afseth JD, Paterson RE. The views of non-medical prescribing students and medical mentors on interprofessional competency assessment – A qualitative exploration. *Nurse Education Today*. 2017;52:103-8.
4. Brodie L, Donaldson J, Watt S. Non-medical prescribers and benzodiazepines: A qualitative study. *Nurse Prescribing*. 2014;12(7):353-9.
5. Courtenay M, Stenner K, Carey N. The views of patients with diabetes about nurse prescribing. *Diabetic Medicine: A Journal Of The British Diabetic Association*. 2010;27(9):1049-54.
6. Courtenay M, Rowbotham S, Lim R, Peters S, Yates K, Chater A. Examining influences on antibiotic prescribing by nurse and pharmacist prescribers: a qualitative study using the Theoretical Domains Framework and COM-B. *BMJ Open*. 2019;9(6):e029177.
7. Cousins R, Donnell C. Nurse prescribing in general practice: a qualitative study of job satisfaction and work-related stress. *Family Practice*. 2012;29(2):223-7.
8. Daughtry J, Hayter M. A qualitative study of practice nurses' prescribing experiences. *Practice Nursing*. 2010;21(6):310-4.
9. Herklots A, Baileff A, Latter S. Community matrons' experience as independent prescribers. *British Journal Of Community Nursing*. 2015;20(5):217.
10. Inch J, Notman F, Bond CM, Alldred DP, Arthur A, Blyth A, et al. The Care Home Independent Prescribing Pharmacist Study (CHIPPS) - a non-randomised feasibility study of independent pharmacist prescribing in care homes. *Pilot Feasibility Stud*. 2019;5:89.
11. Latham K, Nyatanga B. Community palliative care clinical nurse specialists as independent prescribers: part 2. *British Journal Of Community Nursing*. 2018;23(3):126-33.
12. Maddox C, Halsall D, Hall J, Tully MP. Factors influencing nurse and pharmacist willingness to take or not take responsibility for non-medical prescribing. *Research In Social & Administrative Pharmacy: RSAP*. 2016;12(1):41-55.
13. Stenner KL, Courtenay M, Carey N. Consultations between nurse prescribers and patients with diabetes in primary care: A qualitative study of patient views. *International Journal Of Nursing Studies*. 2011;48(1):37-46.
14. Weiss MC, Platt J, Riley R, Horrocks S. GPs, nurses and pharmacists as prescribers in primary care: an exploration using the social identity approach / Hausärzte/-innen, Diplomierte Pflegefachpersonen und Apotheker/-innen als Arzneimittelverschreiber/-innen: eine Exploration mit dem Ansatz der Sozialen Identität. *International Journal of Health Professions*. 2016;3(2):153-64.
15. Williams SJ, Halls AV, Tonkin-Crine S, Moore MV, Latter SE, Little P, et al. General practitioner and nurse prescriber experiences of prescribing antibiotics for respiratory tract infections in UK primary care out-of-hours services (the UNITE study). *J Antimicrob Chemother*. 2018;73(3):795-803.
16. Courtenay M, Rowbotham S, Lim R, Deslandes R, Hodson K, MacLure K, et al. Antibiotics for acute respiratory tract infections: a mixed-methods study of patient experiences of non-medical prescriber management. *BMJ Open*. 2017;7(3):e013515-e.
17. Dhalivaal J. Patients' perspectives on prescribing by nurses in general practice. *Practice Nursing*. 2011;22(1):41-6.

## Supplementary\_File\_4

- 1
- 2
- 3
- 4 18. Lane K, Bond C, Wright D, Alldred DP, Desborough J, Holland R, et al. "Everyone needs to understand each other's systems": Stakeholder views on
- 5 the acceptability and viability of a Pharmacist Independent Prescriber role in care homes for older people in the UK. *Health & Social Care in the Community*.
- 6 2020;28(5):1479-87.
- 7 19. Downer F, Shepherd CK. District nurses prescribing as nurse independent prescribers. *British Journal Of Community Nursing*. 2010;15(7):348-52.
- 8 20. Boreham N, Coull AF, Murray ID, Turner-Halliday F, Watterson AE. Education programmes preparing independent prescribers in Scotland: an
- 9 evaluation. *Nurse Education Today*. 2013;33(4):321-6.
- 10 21. Bowskill D, Meade O, Lymn JS. Use and evaluation of a mentoring scheme to promote integration of non-medical prescribing in a clinical context.
- 11 *BMC Medical Education*. 2014;14:177.
- 12 22. Cole T, Gillett K. Are nurse prescribers issuing prescriptions in palliative care? *Nurse Prescribing*. 2015;13(2):98-102.
- 13
- 14
- 15
- 16
- 17
- 18
- 19
- 20
- 21
- 22
- 23
- 24
- 25
- 26
- 27
- 28
- 29
- 30
- 31
- 32
- 33
- 34
- 35
- 36
- 37
- 38
- 39
- 40
- 41
- 42
- 43
- 44
- 45
- 46

# Reporting checklist for systematic review and meta-analysis.

Based on the PRISMA guidelines.

## Instructions to authors

Complete this checklist by entering the page numbers from your manuscript where readers will find each of the items listed below.

Your article may not currently address all the items on the checklist. Please modify your text to include the missing information. If you are certain that an item does not apply, please write "n/a" and provide a short explanation.

Upload your completed checklist as an extra file when you submit to a journal.

In your methods section, say that you used the PRISMA reporting guidelines, and cite them as:

Moher D, Liberati A, Tetzlaff J, Altman DG, The PRISMA Group. Preferred Reporting Items for Systematic Reviews and Meta-Analyses: The PRISMA Statement

|                     | Reporting Item                                                                                                                                                                                                                                                                                                                | Page Number |
|---------------------|-------------------------------------------------------------------------------------------------------------------------------------------------------------------------------------------------------------------------------------------------------------------------------------------------------------------------------|-------------|
| <b>Title</b>        |                                                                                                                                                                                                                                                                                                                               |             |
|                     | <a href="#">#1</a> Identify the report as a systematic review, meta-analysis, or both.                                                                                                                                                                                                                                        | 1           |
| <b>Abstract</b>     |                                                                                                                                                                                                                                                                                                                               |             |
| Structured summary  | <a href="#">#2</a> Provide a structured summary including, as applicable: background; objectives; data sources; study eligibility criteria, participants, and interventions; study appraisal and synthesis methods; results; limitations; conclusions and implications of key findings; systematic review registration number | 2           |
| <b>Introduction</b> |                                                                                                                                                                                                                                                                                                                               |             |
| Rationale           | <a href="#">#3</a> Describe the rationale for the review in the context of what is already known.                                                                                                                                                                                                                             | 3           |

|    |                                    |                     |                                                                                                                                                                                                                                 |                      |
|----|------------------------------------|---------------------|---------------------------------------------------------------------------------------------------------------------------------------------------------------------------------------------------------------------------------|----------------------|
| 1  | Objectives                         | <a href="#">#4</a>  | Provide an explicit statement of questions being addressed with reference to participants, interventions, comparisons, outcomes, and study design (PICOS).                                                                      | 3                    |
| 2  |                                    |                     |                                                                                                                                                                                                                                 |                      |
| 3  |                                    |                     |                                                                                                                                                                                                                                 |                      |
| 4  |                                    |                     |                                                                                                                                                                                                                                 |                      |
| 5  |                                    |                     |                                                                                                                                                                                                                                 |                      |
| 6  | <b>Methods</b>                     |                     |                                                                                                                                                                                                                                 |                      |
| 7  |                                    |                     |                                                                                                                                                                                                                                 |                      |
| 8  |                                    |                     |                                                                                                                                                                                                                                 |                      |
| 9  | Protocol and registration          | <a href="#">#5</a>  | Indicate if a review protocol exists, if and where it can be accessed (e.g., Web address) and, if available, provide registration information including the registration number.                                                | 5                    |
| 10 |                                    |                     |                                                                                                                                                                                                                                 |                      |
| 11 |                                    |                     |                                                                                                                                                                                                                                 |                      |
| 12 |                                    |                     |                                                                                                                                                                                                                                 |                      |
| 13 |                                    |                     |                                                                                                                                                                                                                                 |                      |
| 14 |                                    |                     |                                                                                                                                                                                                                                 |                      |
| 15 | Eligibility criteria               | <a href="#">#6</a>  | Specify study characteristics (e.g., PICOS, length of follow-up) and report characteristics (e.g., years considered, language, publication status) used as criteria for eligibility, giving rational                            | 5                    |
| 16 |                                    |                     |                                                                                                                                                                                                                                 |                      |
| 17 |                                    |                     |                                                                                                                                                                                                                                 |                      |
| 18 |                                    |                     |                                                                                                                                                                                                                                 |                      |
| 19 |                                    |                     |                                                                                                                                                                                                                                 |                      |
| 20 |                                    |                     |                                                                                                                                                                                                                                 |                      |
| 21 |                                    |                     |                                                                                                                                                                                                                                 |                      |
| 22 | Information sources                | <a href="#">#7</a>  | Describe all information sources in the search (e.g., databases with dates of coverage, contact with study authors to identify additional studies) and date last searched.                                                      | 5                    |
| 23 |                                    |                     |                                                                                                                                                                                                                                 |                      |
| 24 |                                    |                     |                                                                                                                                                                                                                                 |                      |
| 25 |                                    |                     |                                                                                                                                                                                                                                 |                      |
| 26 |                                    |                     |                                                                                                                                                                                                                                 |                      |
| 27 |                                    |                     |                                                                                                                                                                                                                                 |                      |
| 28 |                                    |                     |                                                                                                                                                                                                                                 |                      |
| 29 | Search                             | <a href="#">#8</a>  | Present full electronic search strategy for at least one database, including any limits used, such that it could be repeated.                                                                                                   | Supplementary file 1 |
| 30 |                                    |                     |                                                                                                                                                                                                                                 |                      |
| 31 |                                    |                     |                                                                                                                                                                                                                                 |                      |
| 32 |                                    |                     |                                                                                                                                                                                                                                 |                      |
| 33 |                                    |                     |                                                                                                                                                                                                                                 |                      |
| 34 | Study selection                    | <a href="#">#9</a>  | State the process for selecting studies (i.e., for screening, for determining eligibility, for inclusion in the systematic review, and, if applicable, for inclusion in the meta-analysis).                                     | 6                    |
| 35 |                                    |                     |                                                                                                                                                                                                                                 |                      |
| 36 |                                    |                     |                                                                                                                                                                                                                                 |                      |
| 37 |                                    |                     |                                                                                                                                                                                                                                 |                      |
| 38 |                                    |                     |                                                                                                                                                                                                                                 |                      |
| 39 |                                    |                     |                                                                                                                                                                                                                                 |                      |
| 40 |                                    |                     |                                                                                                                                                                                                                                 |                      |
| 41 | Data collection process            | <a href="#">#10</a> | Describe the method of data extraction from reports (e.g., piloted forms, independently by two reviewers) and any processes for obtaining and confirming data from investigators.                                               | 6                    |
| 42 |                                    |                     |                                                                                                                                                                                                                                 |                      |
| 43 |                                    |                     |                                                                                                                                                                                                                                 |                      |
| 44 |                                    |                     |                                                                                                                                                                                                                                 |                      |
| 45 |                                    |                     |                                                                                                                                                                                                                                 |                      |
| 46 |                                    |                     |                                                                                                                                                                                                                                 |                      |
| 47 |                                    |                     |                                                                                                                                                                                                                                 |                      |
| 48 | Data items                         | <a href="#">#11</a> | List and define all variables for which data were sought (e.g., PICOS, funding sources), and any assumptions and simplifications made.                                                                                          | 6                    |
| 49 |                                    |                     |                                                                                                                                                                                                                                 |                      |
| 50 |                                    |                     |                                                                                                                                                                                                                                 |                      |
| 51 |                                    |                     |                                                                                                                                                                                                                                 |                      |
| 52 |                                    |                     |                                                                                                                                                                                                                                 |                      |
| 53 | Risk of bias in individual studies | <a href="#">#12</a> | Describe methods used for assessing risk of bias in individual studies (including specification of whether this was done at the study or outcome level, or both), and how this information is to be used in any data synthesis. | 6                    |
| 54 |                                    |                     |                                                                                                                                                                                                                                 |                      |
| 55 |                                    |                     |                                                                                                                                                                                                                                 |                      |
| 56 |                                    |                     |                                                                                                                                                                                                                                 |                      |
| 57 |                                    |                     |                                                                                                                                                                                                                                 |                      |
| 58 |                                    |                     |                                                                                                                                                                                                                                 |                      |
| 59 |                                    |                     |                                                                                                                                                                                                                                 |                      |
| 60 |                                    |                     |                                                                                                                                                                                                                                 |                      |

|    |                 |                     |                                                                         |               |
|----|-----------------|---------------------|-------------------------------------------------------------------------|---------------|
| 1  | Summary         | <a href="#">#13</a> | State the principal summary measures (e.g., risk ratio,                 | N/A           |
| 2  | measures        |                     | difference in means).                                                   |               |
| 3  |                 |                     |                                                                         |               |
| 4  | Planned         | <a href="#">#14</a> | Describe the methods of handling data and combining                     | 7             |
| 5  | methods of      |                     | results of studies, if done, including measures of                      |               |
| 6  | analysis        |                     | consistency (e.g., I <sup>2</sup> ) for each meta-analysis.             |               |
| 7  |                 |                     |                                                                         |               |
| 8  | Risk of bias    | <a href="#">#15</a> | Specify any assessment of risk of bias that may affect                  | N/A           |
| 9  | across studies  |                     | the cumulative evidence (e.g., publication bias, selective              |               |
| 10 |                 |                     | reporting within studies).                                              |               |
| 11 |                 |                     |                                                                         |               |
| 12 | Additional      | <a href="#">#16</a> | Describe methods of additional analyses (e.g.,                          | N/A           |
| 13 | analyses        |                     | sensitivity or subgroup analyses, meta-regression), if                  |               |
| 14 |                 |                     | done, indicating which were pre-specified.                              |               |
| 15 |                 |                     |                                                                         |               |
| 16 |                 |                     |                                                                         |               |
| 17 |                 |                     |                                                                         |               |
| 18 |                 |                     |                                                                         |               |
| 19 |                 |                     |                                                                         |               |
| 20 | <b>Results</b>  |                     |                                                                         |               |
| 21 |                 |                     |                                                                         |               |
| 22 |                 |                     |                                                                         |               |
| 23 | Study selection | <a href="#">#17</a> | Give numbers of studies screened, assessed for                          | 8,            |
| 24 |                 |                     | eligibility, and included in the review, with reasons for               |               |
| 25 |                 |                     | exclusions at each stage, ideally with a <a href="#">flow diagram</a> . | Figure 1      |
| 26 |                 |                     |                                                                         | PRISMA        |
| 27 |                 |                     |                                                                         |               |
| 28 |                 |                     |                                                                         |               |
| 29 | Study           | <a href="#">#18</a> | For each study, present characteristics for which data                  | 9,            |
| 30 | characteristics |                     | were extracted (e.g., study size, PICOS, follow-up                      | Supplementary |
| 31 |                 |                     | period) and provide the citation.                                       | file 2        |
| 32 |                 |                     |                                                                         |               |
| 33 |                 |                     |                                                                         |               |
| 34 | Risk of bias    | <a href="#">#19</a> | Present data on risk of bias of each study and, if                      | N/A           |
| 35 | within studies  |                     | available, any outcome-level assessment (see Item 12).                  |               |
| 36 |                 |                     |                                                                         |               |
| 37 |                 |                     |                                                                         |               |
| 38 | Results of      | <a href="#">#20</a> | For all outcomes considered (benefits and harms),                       | N/A           |
| 39 | individual      |                     | present, for each study: (a) simple summary data for                    |               |
| 40 | studies         |                     | each intervention group and (b) effect estimates and                    |               |
| 41 |                 |                     | confidence intervals, ideally with a forest plot.                       |               |
| 42 |                 |                     |                                                                         |               |
| 43 |                 |                     |                                                                         |               |
| 44 |                 |                     |                                                                         |               |
| 45 | Synthesis of    | <a href="#">#21</a> | Present the main results of the review. If meta-analyses                | 11-21         |
| 46 | results         |                     | are done, include for each, confidence intervals and                    |               |
| 47 |                 |                     | measures of consistency.                                                |               |
| 48 |                 |                     |                                                                         |               |
| 49 |                 |                     |                                                                         |               |
| 50 | Risk of bias    | <a href="#">#22</a> | Present results of any assessment of risk of bias across                | Supplementary |
| 51 | across studies  |                     | studies (see Item 15).                                                  | file 3        |
| 52 |                 |                     |                                                                         |               |
| 53 |                 |                     |                                                                         |               |
| 54 | Additional      | <a href="#">#23</a> | Give results of additional analyses, if done (e.g.,                     | N/A           |
| 55 | analysis        |                     | sensitivity or subgroup analyses, meta-regression [see                  |               |
| 56 |                 |                     | Item 16]).                                                              |               |
| 57 |                 |                     |                                                                         |               |
| 58 |                 |                     |                                                                         |               |
| 59 |                 |                     |                                                                         |               |
| 60 |                 |                     |                                                                         |               |



## Discussion

Summary of Evidence [#24](#) Summarize the main findings, including the strength of evidence for each main outcome; consider their relevance to key groups (e.g., health care providers, users, and policy makers) 22

Limitations [#25](#) Discuss limitations at study and outcome level (e.g., risk of bias), and at review level (e.g., incomplete retrieval of identified research, reporting bias). 24

Conclusions [#26](#) Provide a general interpretation of the results in the context of other evidence, and implications for future research. 24

## Funding

Funding [#27](#) Describe sources of funding or other support (e.g., supply of data) for the systematic review; role of funders for the systematic review. 25

None The PRISMA checklist is distributed under the terms of the Creative Commons Attribution License CC-BY. This checklist can be completed online using <https://www.goodreports.org/>, a tool made by the [EQUATOR Network](#) in collaboration with [Penelope.ai](#)

# BMJ Open

## Barriers and facilitators to implementation of non-medical independent prescribing in primary care: a qualitative systematic review.

|                                 |                                                                                                                                                                                                                                                                                                                                                                                                           |
|---------------------------------|-----------------------------------------------------------------------------------------------------------------------------------------------------------------------------------------------------------------------------------------------------------------------------------------------------------------------------------------------------------------------------------------------------------|
| Journal:                        | <i>BMJ Open</i>                                                                                                                                                                                                                                                                                                                                                                                           |
| Manuscript ID                   | bmjopen-2021-052227.R1                                                                                                                                                                                                                                                                                                                                                                                    |
| Article Type:                   | Original research                                                                                                                                                                                                                                                                                                                                                                                         |
| Date Submitted by the Author:   | 29-Nov-2021                                                                                                                                                                                                                                                                                                                                                                                               |
| Complete List of Authors:       | Edwards, Judith; University of Surrey Faculty of Health and Medical Sciences, School of Health Sciences<br>Coward, Melaine; University of Surrey Faculty of Health and Medical Sciences, School of Health Sciences<br>Carey, Nicola; University of Surrey Faculty of Health and Medical Sciences, School of Health Sciences; University of the Highlands and Islands, Department of Nursing and Midwifery |
| <b>Primary Subject Heading</b>: | Health services research                                                                                                                                                                                                                                                                                                                                                                                  |
| Secondary Subject Heading:      | Health policy                                                                                                                                                                                                                                                                                                                                                                                             |
| Keywords:                       | PRIMARY CARE, Health policy < HEALTH SERVICES ADMINISTRATION & MANAGEMENT, Organisational development < HEALTH SERVICES ADMINISTRATION & MANAGEMENT                                                                                                                                                                                                                                                       |
|                                 |                                                                                                                                                                                                                                                                                                                                                                                                           |

SCHOLARONE™  
Manuscripts



I, the Submitting Author has the right to grant and does grant on behalf of all authors of the Work (as defined in the below author licence), an exclusive licence and/or a non-exclusive licence for contributions from authors who are: i) UK Crown employees; ii) where BMJ has agreed a CC-BY licence shall apply, and/or iii) in accordance with the terms applicable for US Federal Government officers or employees acting as part of their official duties; on a worldwide, perpetual, irrevocable, royalty-free basis to BMJ Publishing Group Ltd ("BMJ") its licensees and where the relevant Journal is co-owned by BMJ to the co-owners of the Journal, to publish the Work in this journal and any other BMJ products and to exploit all rights, as set out in our [licence](#).

The Submitting Author accepts and understands that any supply made under these terms is made by BMJ to the Submitting Author unless you are acting as an employee on behalf of your employer or a postgraduate student of an affiliated institution which is paying any applicable article publishing charge ("APC") for Open Access articles. Where the Submitting Author wishes to make the Work available on an Open Access basis (and intends to pay the relevant APC), the terms of reuse of such Open Access shall be governed by a Creative Commons licence – details of these licences and which [Creative Commons](#) licence will apply to this Work are set out in our licence referred to above.

Other than as permitted in any relevant BMJ Author's Self Archiving Policies, I confirm this Work has not been accepted for publication elsewhere, is not being considered for publication elsewhere and does not duplicate material already published. I confirm all authors consent to publication of this Work and authorise the granting of this licence.

MainDocumentV2.0\_19112021

## Title

Barriers and facilitators to implementation of non-medical independent prescribing in primary care in the United Kingdom: a qualitative systematic review.

## Corresponding author

Judith Edwards

University of Surrey Faculty of Health and Medical Sciences, School of Health Sciences  
Guildford, Surrey, United Kingdom, GU2 7YH.

[j.a.edwards@surrey.ac.uk](mailto:j.a.edwards@surrey.ac.uk)

<https://orcid.org/0000-0002-6531-1315>

## Co-authors

Professor Melaine Coward

University of Surrey Faculty of Health and Medical Sciences, School of Health Sciences  
Guildford, Surrey, United Kingdom, GU2 7YH.

[m.coward@surrey.ac.uk](mailto:m.coward@surrey.ac.uk)

Dr Nicola Carey

University of the Highlands and Islands, Department of Nursing and Midwifery, Inverness,  
IV2 3JH

[nicola.carey@uhi.ac.uk](mailto:nicola.carey@uhi.ac.uk)

(Formerly: University of Surrey Faculty of Health and Medical Sciences, School of Health  
Sciences, Guildford, Surrey, United Kingdom, GU2 7YH.

[n.carey@surrey.ac.uk](mailto:n.carey@surrey.ac.uk))

**Word count: 5700**

MainDocumentV2.0\_19112021

**Abstract (296 words)****Objectives**

To support workforce deficits and rising demand for medicines, independent prescribing (IP) by nurses, pharmacists and allied health professionals is a key component of workforce transformation in UK healthcare. This systematic review of qualitative research studies used a thematic synthesis approach to explore stakeholders' views on IP in primary care and identify barriers and facilitators influencing implementation.

**Setting**

UK primary/community care.

**Participants:**

Inclusion criteria were UK qualitative studies of any design, published in the English language. Six electronic databases were searched between January 2010 and September 2021, supplemented by reference list searching. Papers were screened, selected and quality-appraised using the Quality Assessment Tool for Studies with Diverse Designs. Study data was extracted to a bespoke table and two reviewers used NVivo software to code study findings. An inductive thematic synthesis was undertaken to identify descriptive themes and interpret these into higher order analytical themes. The Diffusion of Innovations and Consolidated Framework for Implementation Research were guiding theoretical anchors.

**Primary and secondary outcome measures:** N/A.

**Results**

Twenty-three articles addressing nurse, pharmacist and physiotherapist IP were included. Synthesis identified barriers and facilitators in four key stages of implementation: 1) "Preparation", 2) "Training", 3) "Transition" and 4) "Sustainment". Enhancement, substitution, and role specific implementation models reflected three main ways that the IP role was used in primary care.

**Conclusions**

In order to address global deficits, there is increasing need to optimise use of IP capability. Although the number of independent prescribers continues to grow, numerous barriers to implementation persist. A more coordinated and targeted approach is key to overcoming barriers identified in the four stages of implementation and would help ensure that IP is recognised as an effective approach to help alleviate workforce shortfalls in the UK, and around the world. PROSPERO registration number CRD42019124400.

MainDocumentV2.0\_19112021

## Article Summary

### Strengths and limitations of this study (122 words)

- This is first qualitative meta synthesis to explore barriers and facilitators to independent prescribing by nurses, pharmacists and allied health professionals in UK primary care.
- Use of Diffusion of Innovation theory and the Consolidated Framework for Implementation Research supported identification of barriers and facilitators at organisational, team and individual practitioner level.
- Four key stages of implementation were identified: 1) preparation, 2) training, 3) transition and 4) sustainment.
- Enhancement, substitution, and role specific implementation models reflected the three main ways that the independent prescribing role was used in primary care
- As the focus was on primary care barriers and facilitators in acute care and other care settings were excluded.
- In order to develop context-embodied knowledge of barriers and facilitators quantitative literature was excluded.

### Key words

Implementation, barriers, facilitators, non-medical prescribing, independent prescribing, primary care, meta-synthesis

## Introduction

Equitable access to primary care improves health outcomes, lowers costs and enhances patient experience<sup>(1, 2)</sup>. Global workforce deficits<sup>(3-5)</sup> and the rising prevalence of long-term conditions<sup>(6, 7)</sup>, multimorbidity<sup>(8-10)</sup> and COVID-19<sup>(11)</sup> have severely threatened primary care sustainability<sup>(12-15)</sup>. Medicines use in global priorities including diabetes and cardiovascular diseases is increasing, with worldwide drug therapy days rising in 2019 to 1.8 trillion and an average of 234 days per person/year<sup>(16)</sup>. With one in four adults in United Kingdom (UK) primary care taking five or more medicines daily<sup>(17)</sup>, the workforce implications for meeting prescribing needs are profound.

Mobilising primary care to improve workforce and service sustainability is a global challenge<sup>(5, 18)</sup>. As in other countries<sup>(19, 20)</sup>, primary care in the four devolved UK nations (i.e., England, Scotland, Wales, Northern Ireland) has undergone significant restructuring and reorganisation<sup>(21-24)</sup>. In England, for example, the 2019 NHS long-term plan amalgamated GP practices into primary care networks (PCN), covering populations of 30-50,000<sup>(25)</sup>. Pooling resources to achieve government targets<sup>(26)</sup> with the promise of extra non-medical staff (e.g., advanced/specialist clinical pharmacists, dieticians, paramedics and physiotherapists), PCNs were expected to offer additional hours within broader service options<sup>(27)</sup>. While the impact of the new 2021/22 Health and Care Bill<sup>(28)</sup> on primary care workforce transformation in England remains uncertain, the diverse skills of the non-medical advanced practice workforce including prescribing capability are likely to remain important for addressing UK primary care prescribing and medicines optimisation needs<sup>(29-31)</sup>.

In line with global movements to enhance the skills of non-medical healthcare professionals, over 90,000 UK nurses, pharmacists, optometrists, radiographers, physiotherapists, podiatrists, dieticians and paramedics<sup>(32)</sup> under serial legislative changes<sup>(33-36)</sup> and with accredited additional training<sup>(37-39)</sup> are authorised to prescribe using supplementary and/or independent forms. Although UK legislation restricts dieticians and diagnostic radiographers to supplementary prescribing, as reported by professions with dual supplementary/IP rights (e.g., nurses, pharmacists, physiotherapists, podiatrists) IP is more workable<sup>(40, 41)</sup> and has largely superseded supplementary prescribing in many UK non-doctor led primary and community care services<sup>(42-44)</sup>. Enabling the autonomous initial assessment and on-going management of patient prescribing and medicines optimisation needs, IP increases practitioner autonomy/expertise<sup>(29, 45-47)</sup>, enhances clinical outcomes compared to doctor-led care<sup>(29)</sup> and results in high service-user satisfaction<sup>(48)</sup>. Across contemporary primary care

MainDocumentV2.0\_19112021

1  
2  
3 settings in the UK and internationally IP is an increasingly essential component of service re-  
4 design<sup>(45, 49-54)</sup>.

5  
6 Despite its many benefits, the UK adoption rates for IP vary<sup>(55, 56)</sup>, with medical opposition to  
7 prescribing roles<sup>(57, 58)</sup>, training course drop-out<sup>(46)</sup>, delayed prescribing onset<sup>(59, 60)</sup> and role  
8 underuse reported<sup>(61-64)</sup>. Difficulties with implementation are frequently cited<sup>(43, 46, 59, 65-67)</sup>.

9  
10 Several UK<sup>(68, 69)</sup> and international systematic<sup>(54, 70-72)</sup> and literature reviews,<sup>(73, 74)</sup> have  
11 focused on implementation barriers and/or facilitators. However, these have been  
12 profession-specific<sup>(54, 70-72, 74)</sup>, have included international models with varying  
13 legislative/jurisdictional levels of prescribing autonomy<sup>(54, 70-72)</sup> and/or have addressed  
14 prescribing in heterogenous care settings<sup>(54, 68, 69, 74)</sup>. None have synthesised qualitative  
15 studies in all IP eligible professions in UK primary care. Considering IP enhances workforce  
16 skills and builds capacity for service redesign and improved sustainability<sup>(42, 75-77)</sup>, identifying  
17 and understanding the challenges to its implementation is ever pressing<sup>(78, 79)</sup>.

## 24 25 **Aim**

26  
27 This qualitative meta-synthesis aimed to identify barriers and facilitators that influence  
28 implementation of IP in UK primary care.

## 30 31 **Theoretical perspective**

32  
33 This review is broadly informed by the Diffusion of Innovations theory<sup>(80, 81)</sup> and the  
34 Consolidated Framework for Implementation Research<sup>(82, 83)</sup> which provided theoretical  
35 anchors for identifying contextual factors likely to influence implementation<sup>(84-89)</sup>.

## 38 39 **Methods**

40  
41 This qualitative meta-synthesis is reported following the Enhancing transparency in reporting  
42 the synthesis of qualitative research (ENTREQ) guidelines<sup>(90)</sup> which incorporates elements of  
43 the Preferred Reporting Items for Systematic Reviews and Meta-Analyses (PRISMA)  
44 statement<sup>(91)</sup>. Thematic qualitative meta-synthesis<sup>(92, 93)</sup> permits synthesis of context-  
45 embodied research and is a suitable method for identifying factors influencing  
46 implementation<sup>(94-96)</sup>. The review was registered in PROSPERO (CRD42019124400)<sup>(97)</sup>.

## 50 51 52 **Search strategy**

53  
54 A systematic search of UK literature on primary and community care IP was undertaken in  
55 January 2021 and updated in September 2021. Barriers/facilitators to healthcare innovations  
56 are conceptually well established<sup>(98-102)</sup> and thus grey literature was excluded. Search terms  
57 were developed according to the Sample, Phenomenon of Interest, Design, Evaluation,  
58  
59  
60



MainDocumentV2.0\_19112021

1  
2  
3 Research Type (SPIDER) tool<sup>(103)</sup> and tested based on truncations of words related to  
4 prescribing, community/primary care and UK non-medical healthcare professions with IP  
5 authority (e.g., nurses, pharmacists, optometrists, physiotherapists, podiatrists, paramedics  
6 and radiographers). Wild card and Boolean Search Operators were used. Qualitative search  
7 terms were not included<sup>(104, 105)</sup>; all citations were screened for qualitative methodology.  
8 Search strings (see supplementary file 1 examples) were adapted for 6 electronic databases  
9 (EBSCO - MEDLINE, CINAHL, OVID – EMBASE, ProQuest - British Nursing Index, Nursing  
10 & Allied Health, Web of Science). The 2010 inception search date reflected major UK  
11 coalition governmental change and the introduction of landmark legislative reforms<sup>(106-109)</sup>  
12 that decentralised UK primary/community care commissioning<sup>(110)</sup>. Inclusion criteria applied  
13 to study selection are shown in Table 1. Retrieved citations were downloaded to EndNote  
14 V.X9 and duplicates removed.  
15  
16  
17  
18  
19  
20  
21  
22  
23  
24

**Table 1 Inclusion and exclusion criteria**

| Inclusion Criteria                                                                                                                              | Exclusion Criteria                                                                            |
|-------------------------------------------------------------------------------------------------------------------------------------------------|-----------------------------------------------------------------------------------------------|
| ▶ Primary research conducted in the UK (England, Scotland, Northern Ireland and/or Wales)                                                       | ▶ International/UK literature reviews, meta-analyses or meta-synthesis and/or grey literature |
| ▶ Studies employing participatory and/or non-participatory data collection methods within any qualitative, quantitative or mixed methods design | ▶ Quantitative studies not employing qualitative data collection methods                      |
| ▶ Studies addressing IP by legislated non-doctor healthcare professionals                                                                       | ▶ Studies addressing supplementary, dependent and/or collaborative models of prescribing      |
| ▶ Studies addressing primary/ community care IP                                                                                                 | ▶ Studies addressing secondary care and/or mixed primary and secondary care IP                |
| ▶ Studies presenting empirical evidence of barriers and/or facilitators to IP implementation                                                    |                                                                                               |
| ▶ Studies addressing non-context specific educational programmes for non-medical IP                                                             |                                                                                               |
| ▶ Peer reviewed, full text articles published between 01 January 2010 and 30 September 2021 in the English language                             |                                                                                               |

### Screening and eligibility

53  
54 Two reviewers (JE, NC) independently assessed all titles and abstracts against the inclusion  
55 criteria and the full-text versions of papers deemed potentially relevant were obtained and  
56 reviewed. Papers found not to meet the criteria during screening were excluded with  
57  
58  
59  
60

MainDocumentV2.0\_19112021

reasons recorded as shown in the Preferred Reporting Items for Systematic Reviews and Meta-Analyses (PRISMA) table (Figure 1). Reference list hand searching supplemented database searching.

### Figure 1 goes here

**Figure 1.** Preferred Reporting Items for Systematic Reviews and Meta-Analyses depicting study selection, screening, eligibility for inclusion and synthesis (adapted from Page et al 2021)<sup>(91)</sup>.

#### Quality assessment

In keeping with the scope of a qualitative meta-synthesis<sup>(111, 112)</sup>, studies were not excluded on the basis of quality assessment<sup>(92, 113)</sup>. Methodological appraisal of individual papers was undertaken using the Quality Assessment Tool for Studies with Diverse Designs (QATSDD)<sup>(114)</sup>, which has demonstrated validity and test-retest reliability for assessing the reporting and methodological transparency of diverse study designs<sup>(115)</sup>. The tool uses a 4-point scoring system for assessment of qualitative studies (14 questions) and mixed methods studies (16 questions), resulting in total possible scores of 42 and 48 respectively<sup>(114)</sup>. Scoring was undertaken by one reviewer (JE) and any uncertainties were discussed and resolved with a second reviewer (NC). Supplementary file 2 provides a detailed breakdown of questions and the grading of study manuscripts.

#### Data extraction

Study data were extracted by one author (JE) to a bespoke table adapted from recommended templates<sup>(116)</sup>. This collated contextual and methodological information, data on barriers and/or facilitators and main findings and was piloted on 5 index studies to ensure consistency and usability. Data extraction was recursive and involved repeated review/update between ensuing analysis stages<sup>(117)</sup>.

#### Data analysis and synthesis

The aim of thematic analysis was to develop a coherent synthesis of barriers and facilitators that influenced IP across stages of the implementation continuum<sup>(118-120)</sup>. Data analysis followed a four stage, iterative process described by Thomas and Harden (2008)<sup>(121)</sup> (Table 2). Qualitative “data” referred to participant quotations, (sub)themes, explanations, hypotheses or new theory, observational excerpts and author interpretations<sup>(122)</sup>. Barriers were defined as “any obstacle (material or immaterial) impeding adoption, implementation

MainDocumentV2.0\_19112021

and/or sustainability of IP<sup>(123, 124)</sup> and facilitators were defined as “any obstacle (material or immaterial) enhancing adoption, implementation and/or sustainability of IP<sup>(123, 124)</sup>.”

**Table 2 Stages of analysis**

|         |                                                                                                                                                                                                                                               |
|---------|-----------------------------------------------------------------------------------------------------------------------------------------------------------------------------------------------------------------------------------------------|
| Stage 1 | In-depth reading and familiarisation with individual papers, data extraction                                                                                                                                                                  |
| Stage 2 | Inductive line-by-line coding of highest quality, index papers (n=5) to develop a set of “open codes” by two independent reviewers (JE, NC).                                                                                                  |
| Stage 3 | Codes discussed/agreed, grouped into descriptive themes using NVivo <sup>(125)</sup> ; codebook applied to all papers, and expanded/modified by identifying new codes/themes and/or merging/renaming existing codes/themes <sup>(126)</sup> . |
| Stage 4 | Descriptive themes organised into higher order analytical themes and matrix charted with corresponding indicative quotes                                                                                                                      |

### Rigour within the analytical process

To ensure analytic rigour, two independent reviewers (JE, NC) initially performed inductive line-by-line data coding from 5 highest quality index papers (stage 2). Each reviewer produced sets of open data codes which were compared and discussed. If different codes and/or different interpretations were assigned to a concept, these were discussed and revised. Disagreements were resolved by a third reviewer (MC). Data codes were subsequently grouped into descriptive themes, creating a codebook for application to all papers (stage 3). To identify possible contradictory cases and clarify thematic commonalities within studies<sup>(127)</sup>, a matrix of participant quotes was charted to constituent themes (see Supplementary file 3)<sup>(128)</sup>.

### Patient and public involvement

The review was conducted as part of a PhD exploring paramedic IP in UK primary care, for which a University service user/carers group was instrumental in informing study design and methods. However, as the systematic review focused on implementation challenges and not patient-related outcomes, the group was not involved its design or conduct.

### Results

Twenty-three of the 5,365 original articles identified met inclusion criteria<sup>(129-152)</sup> (see Figure 1. PRISMA table).

### Study characteristics and quality assessment

Table 3 summaries the study characteristics and quality assessment scores of included articles. Studies were undertaken in in England<sup>(131, 134, 135, 138, 140, 142, 143, 145, 148-152)</sup>, Scotland<sup>(129,</sup>

MainDocumentV2.0\_19112021

1  
2  
3 130, 132, 141), or across devolved UK nations<sup>(133, 136, 137, 144, 146)</sup>. The representation of  
4 independent prescribers from Wales<sup>(133, 136)</sup> and Northern Ireland<sup>(144, 146)</sup> was limited.  
5  
6  
7

8 Eighteen studies used qualitative methods<sup>(129, 132, 133, 135, 137-142, 144, 146, 147, 149-152)</sup>, seven used  
9 mixed methods<sup>(130, 131, 134, 136, 143, 144)</sup> and one employed a qualitative survey<sup>(145)</sup>. Fifteen  
10 studies addressed nurse IP<sup>(129-131, 134-136, 138-142, 145, 148, 150, 152)</sup>, seven included pharmacists<sup>(132,</sup>  
11 <sup>133, 137, 144, 146, 149, 151)</sup> and one study focused on physiotherapists<sup>(143)</sup>. Where indicated, studies  
12 were conducted pre-2011<sup>(130, 131, 135, 139-141, 145, 149-151)</sup>, between 2011-2015<sup>(129, 132, 134, 136, 147, 148,</sup>  
13 <sup>152)</sup> or between 2016-2019<sup>(133, 137, 144, 146)</sup>.  
14  
15  
16  
17  
18  
19  
20  
21  
22  
23  
24  
25  
26  
27  
28  
29  
30  
31  
32  
33  
34  
35  
36  
37  
38  
39  
40  
41  
42  
43  
44  
45  
46  
47  
48  
49  
50  
51  
52  
53  
54  
55  
56  
57  
58  
59  
60

For peer review only

MainDocumentV2.0\_19112021

**Table 3. Characteristics of included studies (n=23) and key barriers and facilitators**

| Author(s), year          | Country, Setting                                              | Study focus, Participants                                                                                                                 | Barriers                                           | Facilitators                                          | QATSDD score |
|--------------------------|---------------------------------------------------------------|-------------------------------------------------------------------------------------------------------------------------------------------|----------------------------------------------------|-------------------------------------------------------|--------------|
| Afseth et al (2017)      | Scotland. HEI.                                                | Views on prescribing training. 6 NIP trainees, 6 DMPs                                                                                     | 1, 2, 3                                            | 4, 5, 6, 7, 8                                         | 67%          |
| Boreham et al (2013)     | Scotland. HEI.                                                | Views on prescribing training. 87 NIP trainees, 10 HEI leads.                                                                             | 1, 2, 3, 8, 9                                      | 4, 5, 9, 10, 11                                       | 67%          |
| Bowskill et al (2014)    | England. HEI.                                                 | Views on prescribing training<br>6 IP trainees, 3 IPs (unspecified professions)                                                           | 1, 3, 9                                            | 12                                                    | 60%          |
| Brodie et al (2014)      | Scotland. Gen-P, Comm.                                        | Views on prescribing role.<br>4 NIPs, 4 PIPs.                                                                                             | 8, 13, 14, 15, 16, 17, 18, 19                      | 9, 10, 20, 21, 22, 23, 24                             | 38%          |
| Carter et al (2021)      | England, Scotland, Wales. Gen-P, Comm pharmacy.               | Factors influencing prescribing and role of practice pharmacists on evidence based prescribing. 6 GPs, 6 NIPs, 6 PIPs, 12 key informants. | 25, 26, 27                                         | 9, 11, 24, 28, 29, 30, 31, 32, 61                     | 78%          |
| Cole & Gillett (2015)    | England. Comm pall care.                                      | Prescribing practices. 6 NIPs.                                                                                                            | 2, 3, 15, 26, 27, 33, 34, 35, 36, 37, 38           | 21, 28, 30, 37, 61                                    | 29%          |
| Courtenay et al (2010)   | England. Gen-P, Comm clinics.                                 | Patient experiences/views of nurse prescribing. 41 patients.                                                                              |                                                    | 10, 11, 22, 39                                        | 50%          |
| Courtenay et al (2017)   | England, Scotland, Wales. Gen-P, Comm clinics.                | Patient experiences/views of nurse and pharmacist antibiotic prescribing for respiratory tract infection. 16 NIPs, 1 PIP, 22 patients.    | 27                                                 | 22, 23, 39, 40, 41                                    | 67%          |
| Courtenay et al (2019)   | UK (unspecified countries). Gen-P, OOH, IC.                   | Factors influencing antibiotic prescribing for respiratory tract infection. 17 NIPs, 4 PIPs.                                              | 18, 27, 38, 42, 43                                 | 6, 10, 11, 22, 23, 24, 28, 29, 32, 39, 40, 41, 44, 57 | 78%          |
| Cousins & Donnell (2012) | England. Gen-P.                                               | Views on prescribing role. 6 NIPs.                                                                                                        | 3, 16, 18, 27, 34, 35, 37, 42, 45,                 | 6, 9, 10, 20, 24, 28, 61                              | 59%          |
| Daughtry et al (2010)    | England. Gen-P.                                               | Experiences of prescribing role. 8 practice NIPs.                                                                                         | 3, 6, 18, 27, 29, 35, 62                           | 5, 8, 9, 10, 11, 24, 28, 29, 30, 44, 46, 47, 57, 61   | 36%          |
| Dhalivaal et al (2011)   | England. Gen-P.                                               | Patient views on nurse prescribing. 15 patients.                                                                                          |                                                    | 22, 39                                                | 43%          |
| Downer & Shepherd (2010) | Scotland. Comm.                                               | Views on prescribing role. 8 district NIPs.                                                                                               | 3, 15, 17, 18, 35, 37, 38, 45, 48, 49, 62          | 3, 9, 10, 30, 44, 57, 61                              | 48%          |
| Herklots et al (2015)    | England. Comm.                                                | Experiences of prescribing. 7 community matron IPs.                                                                                       | 3, 15, 16, 18, 35, 38, 48, 49, 62                  | 6, 7, 10, 11, 12, 22, 29, 47, 57, 61                  | 43%          |
| Holden et al (2019)      | England.                                                      | Medicines optimisation practices. 20 physio non-IPs, 1 physio-IP.                                                                         | 3, 13, 36, 42, 45, 50, 51                          | 10, 21                                                | 75%          |
| Inch et al (2019)        | England, Scotland, Northern Ireland. Elderly residential care | Feasibility of implementation. 2 P non-IPs, 4 PIPs, 6 GPs, 16 care home staff, 2 patients, 3 relatives, 1 dietician non-IP.               | 3, 49                                              | 10, 21, 22, 23, 52                                    | 54%          |
| Kelly et al (2010)       | England. Gen-P.                                               | Barriers to adoption of IP. 31 practice NIPs, 120 N non-IPs.                                                                              | 1, 2, 3, 9, 13, 35, 36, 42, 45, 50, 51, 53, 54, 55 |                                                       | 33%          |

MainDocumentV2.0\_19112021

| Author(s), year             | Country, Setting                                              | Study focus, Participants                                                                                    | Barriers                                     | Facilitators                                     | QATSDD score |
|-----------------------------|---------------------------------------------------------------|--------------------------------------------------------------------------------------------------------------|----------------------------------------------|--------------------------------------------------|--------------|
| Lane et al (2020)           | England, Scotland, Northern Ireland. Elderly residential care | Barriers and facilitators to prescribing. 27 P non-IPs, 29 GPs, 12 care home staff, 7 patients, 7 relatives. | 3, 35, 43, 48, 49                            | 6, 7, 8, 10, 11, 21, 22, 39, 46, 52, 56          | 78%          |
| Latham & Nyatanga (2018a,b) | England. Comm pall care.                                      | Views on prescribing role. 6 NIPs.                                                                           | 3, 15, 18, 27, 35, 36, 38, 49, 50, 60        | 7, 8, 10, 11, 12, 20, 21, 22, 30, 44, 52, 57, 61 | 71%          |
| Maddox et al (2016)         | England. Gen-P. Comm, Nursing homes, Comm pharmacy.           | Barriers and facilitators to prescribing. 25 NIPs, 5 PIPs.                                                   | 3, 15, 16, 26, 27, 29, 35, 37, 42, 48, 62    | 6, 7, 10, 12, 24, 29, 30, 42, 47, 57, 61         | 71%          |
| Stenner et al (2011)        | England. Gen-P, Comm clinics.                                 | Patient views on nurse prescribing. 41 patients.                                                             |                                              | 11, 22, 23, 29, 39                               | 55%          |
| Weiss et al (2016)          | England. Gen-P                                                | Views on prescribing role. 7 NIPs, 7 PIPs, 7 GPs.                                                            | 3, 6, 17, 25, 35, 45, 49, 51, 56, 58, 59, 63 | 3, 6, 8, 11, 12, 22, 24, 29, 39, 44, 46, 47, 63  | 52%          |
| Williams et al (2018)       | England. OOH/unscheduled care.                                | Factors influencing nurse and GP antibiotic prescribing for respiratory tract infection. 15 NIPs, 15 GPs.    | 15, 16, 18, 26, 27, 34, 49, 59               | 6, 12, 22, 23, 24, 28, 32, 41                    | 76%          |

Comm – community, DMPs – designated medical practitioners, Gen-P – general practice, GPs – general practitioners, HEI – higher educational institute, IC – integrated care, NIP – nurse independent prescribers, N non-IPs – nurse non-prescribers, pall – palliative, physio-IP – physiotherapist independent prescriber, physio non-IPs – physiotherapist non-prescribers, PIPs – pharmacist independent prescribers, OOH – out of hours.

**Barriers:** 1=Lack of backfill/protected/study time, 2=Lack of DMP role clarity/supervision/availability, 3=Lack of medical/managerial support/leadership, 14=Lack of national IP incentives/policy initiatives, 15=Lack of clinical record/IT access, 16=Lack of CPD/supervision, 17=IP role isolation, 18=Time/workload constraints, 19=Lack of IP strategy, 25=Lack of inter-professional collaboration/communication networks, 26=Unclear/absent clinical protocols/guidelines, 27=Inappropriate patient/team pressure for prescribing, 33=Lack of local policies for IP, 34=Lack of governance/accountability structures, 35=Lack of team understanding of IP, 36=Lack of clinical/service advantage of IP, 37=Lack of peer support/mentoring, 38=Lack of prescribing confidence/competence, 42=Fear of responsibility/accountability/error, 43=Lack of practitioner specialist skills, 45=Lack of professional/personal adoption incentive, 48=Poor/absent physician relationships, 49=Lack of IP role clarity, 50=Expedient medicines pathways, 51=Prescribing considered outside professional practice scope, 53=Lack of course information, 54=Inconsistent selection policies, 55=Lack of workforce planning, 58=Formulary restrictions, 59=Lack of service user acceptance, 60=Delayed registration post qualification, 62=Lack of medical supervision, 63=Employment model

**Facilitators:** 4=DMP role clarity/good DMP supervision, 5=Inter-professional training model, 6=IP role clarity, 7=Established physician relationships, 8=Medical/managerial support/leadership, 9=Professional/personal adoption incentive, 10=Clinical/service advantage of IP, 11=Inter-professional collaboration/communication networks, 12=Peer support/mentoring, 13=Lack of course funding, 20=Prescribing integral to advanced practice, 21=Identified service pathways gaps, 22=Practitioner specialist skills, 23=Consultation time, 24=CPD/supervision, 28=Clinical/professional protocols/guidelines, 29=Prescribing confidence/competence, 30=Exposure to prescribing opportunity, 31=Adequate formulary, 32=National incentives/policy initiatives for prescribing, 39=Service user acceptance of IP, 40=Governance/accountability structures, 41=Audit/feedback on prescribing practice, 44=Good interprofessional relationships, 46=Stakeholder consultation, 47=Team understanding of IP, 52=Clinical record/IT access, 56=Employment model, 57=Medical supervision, 61=Delineated scope of prescribing competence

MainDocumentV2.0\_19112021

All studies reported results from primary care IP implementation; in general practice<sup>(138-140, 145)</sup>, community domiciliary/residential care<sup>(134, 141, 142, 144, 146, 148, 152)</sup> or mixed general practice/community settings<sup>(129-133, 135-137, 143, 149, 150)</sup>. Participants included nurse/pharmacist prescribers<sup>(132, 134, 136-139, 141, 142, 148, 149, 151, 152)</sup>, nurse/physiotherapist non-prescribers<sup>(143, 145)</sup>, nurse non-medical prescriber trainees and educational staff<sup>(129-131)</sup>, service-users<sup>(135, 136, 140, 150)</sup> and multi-disciplinary team members<sup>(144, 146, 151, 152)</sup>. Studies explored training<sup>(129-131)</sup>, IP roles<sup>(132, 138, 139, 141, 148, 151)</sup>, patient acceptance<sup>(135, 140, 150)</sup>, prescribing/medicines optimisation practices<sup>(133, 134, 136, 142, 143, 152)</sup>, implementation feasibility<sup>(144)</sup> and barriers and/or facilitators<sup>(137, 145, 146, 149)</sup>.

The methodological quality of included studies (see Table 3 summary) was average, with a QATSDD mean score 25 (range 13-36), mainly due to seven low scoring studies<sup>(132, 134, 139-142, 145)</sup>. Common methodological weaknesses were: lack of explicit theoretical framework<sup>(132, 134, 139, 140, 142, 145)</sup>, limited/absent rationale for choice of analytical methods<sup>(132, 134, 139-142, 145)</sup> and lack of reliability assessment for analytical processes<sup>(132, 134, 139-142, 145)</sup>. Methodological strengths of higher scoring studies were: statement of aims/objectives in main body of report<sup>(130, 133, 136, 137, 143, 147, 152)</sup>, description of data collection procedures<sup>(130, 133, 137, 143, 146, 147, 149)</sup> and fit between research question and method of analysis<sup>(130, 136, 137, 143, 146, 147, 149, 152)</sup>. Notably studies providing richer contextual descriptions<sup>(133, 137, 146, 148, 149, 152)</sup>, and/or using implementation theory<sup>(137, 146)</sup> explored barriers and/or facilitators in greater depth.

### **Identification of barriers and facilitators and key stages of implementation**

Implementation of IP in primary care was found to be complex and influenced by a myriad of factors which were active at organisational, service/team and individual stakeholder levels. Informed by descriptive/data themes, these fell into four major analytical themes, each of which are presented as a key stage in the implementation process as follows:

- 1) Analytical theme 1: Preparation – organisational readiness for implementation
- 2) Analytical theme 2: Training – optimising practitioner readiness for IP
- 3) Analytical theme 3: Transition – ensuring early prescribing support
- 4) Analytical theme 4: Sustainment – maximising and developing IP

Table 4 provides an overview of analytical themes, associated descriptive/data themes and summative findings. Examples of indicative quotations making up these themes are presented in Supplementary file 3. Factors presented within themes acted as barriers and/or facilitators to implementation, e.g., poor managerial support was a barrier, while proactive managerial support and leadership facilitated implementation. It is acknowledged that

MainDocumentV2.0\_19112021

1  
2  
3 barriers and facilitators overlap some themes and in some cases are interdependent. For  
4 example, lack of mentoring relationships with doctors limited opportunity for informal support,  
5 which in turn prevented prescribing competence development and risked loss of prescriber  
6 confidence<sup>(142, 149)</sup>. Therefore, to avoid duplication of findings, barriers and facilitators are  
7 presented within the themes deemed most appropriate, yet their presence and influence is  
8 acknowledged elsewhere. The majority of data derived from studies conducted in England or  
9 mixed geographical settings, it was not possible deduce differences in barriers and  
10 facilitators across the devolved UK nations.  
11  
12  
13  
14  
15  
16  
17  
18  
19  
20  
21  
22  
23  
24  
25  
26  
27  
28  
29  
30  
31  
32  
33  
34  
35  
36  
37  
38  
39  
40  
41  
42  
43  
44  
45  
46  
47  
48  
49  
50  
51  
52  
53  
54  
55  
56  
57  
58  
59  
60

For peer review only



**Table 4. Analytical themes and sub-themes from included studies, with summative findings**

| Analytical Theme                                                                             | Descriptive Theme                                                 | Data theme                                                   | Summative findings                                                                                                                                                                                                                                                                                                                                                                                                                                                                                                                                                                                                                                                                                                                                                                                                                                                                                                                                                                                                                                                                                                                                                                                                                                                   |
|----------------------------------------------------------------------------------------------|-------------------------------------------------------------------|--------------------------------------------------------------|----------------------------------------------------------------------------------------------------------------------------------------------------------------------------------------------------------------------------------------------------------------------------------------------------------------------------------------------------------------------------------------------------------------------------------------------------------------------------------------------------------------------------------------------------------------------------------------------------------------------------------------------------------------------------------------------------------------------------------------------------------------------------------------------------------------------------------------------------------------------------------------------------------------------------------------------------------------------------------------------------------------------------------------------------------------------------------------------------------------------------------------------------------------------------------------------------------------------------------------------------------------------|
| Analytical theme 1: Preparation – organisational readiness for implementation                | Theme 1.1: Clarifying need & advantage of independent prescribing | Clarifying clinical/service need for independent prescribing | <ul style="list-style-type: none"> <li>Establishing a clear service/clinical need for IP<sup>(130, 135, 137-139, 141, 149)</sup> and identifying existing gaps in medicines pathways was a key requisite and facilitator for adoption<sup>(132, 134, 143, 144, 146, 148)</sup>.</li> <li>Team clarity on the need for adoption cemented IP role intentions and avoided role dissonance following implementation<sup>(139, 142, 144, 146, 149, 151)</sup>.</li> <li>Managerial leadership/support for IP was essential for ensuring initial and on-going infrastructural, funding and other implementation support needs<sup>(129-132, 134, 138, 139, 141-144, 146, 148, 151)</sup>.</li> <li>Trusting interprofessional relationships, collaboration/team-working built confidence in IP and facilitated team support for implementation<sup>(129, 130, 133, 135, 137, 139, 141, 142, 146, 148, 149, 151)</sup>.</li> </ul>                                                                                                                                                                                                                                                                                                                                          |
|                                                                                              |                                                                   | Establishing service pathway gaps                            |                                                                                                                                                                                                                                                                                                                                                                                                                                                                                                                                                                                                                                                                                                                                                                                                                                                                                                                                                                                                                                                                                                                                                                                                                                                                      |
|                                                                                              | Role clarity                                                      |                                                              |                                                                                                                                                                                                                                                                                                                                                                                                                                                                                                                                                                                                                                                                                                                                                                                                                                                                                                                                                                                                                                                                                                                                                                                                                                                                      |
| Analytical theme 2: Training – optimising practitioner readiness for independent prescribing | Theme 1.2: Managerial leadership and support                      | Role of managers                                             | <ul style="list-style-type: none"> <li>Adoption was impeded by inconsistent candidate selection policies and lack of workforce planning<sup>(143, 145)</sup>. Individual practitioner expectation of professional/personal benefit remained a key driver for IP adoption<sup>(130, 132, 133, 138, 139, 141)</sup>.</li> <li>Skills requisite to IP (e.g., physical assessment and communication skills) were important factors influencing service user and team acceptance of IP<sup>(135, 136, 140, 144, 146, 148, 150-152)</sup>.</li> <li>Motivational barriers (e.g., lack of remuneration, fear of litigation and competing professional or personal commitments) disincentivised training uptake<sup>(138, 143, 145)</sup>.</li> <li>Lack of information on NMP training and support for managing competing work, personal/academic commitments negatively influenced student learning experiences<sup>(129-131, 145, 148)</sup>.</li> <li>Standardised allocation of study leave/backfill/protected time and prepared practice mentors were essential to support learning<sup>(129-131, 134)</sup>.</li> <li>Additional training buddying schemes helped students better manage the competing demands of training whilst working<sup>(131)</sup>.</li> </ul> |
|                                                                                              |                                                                   | Recognising value                                            |                                                                                                                                                                                                                                                                                                                                                                                                                                                                                                                                                                                                                                                                                                                                                                                                                                                                                                                                                                                                                                                                                                                                                                                                                                                                      |
|                                                                                              |                                                                   | Culture                                                      |                                                                                                                                                                                                                                                                                                                                                                                                                                                                                                                                                                                                                                                                                                                                                                                                                                                                                                                                                                                                                                                                                                                                                                                                                                                                      |
| Analytical theme 3: Transition – ensuring early prescribing support                          | Theme 1.3: Inter-professional environment                         | Inter-professional relationships                             | <ul style="list-style-type: none"> <li>Transition was a point of high vulnerability for new prescribers with an initial lack of confidence often under-recognised by teams<sup>(137, 139, 141, 142, 148, 149)</sup>.</li> <li>Delineating a minimum scope of practice by restricting formulary and/or using guidelines/protocols facilitated early growth of competence and confidence<sup>(138, 139, 141, 142, 149, 151)</sup>.</li> <li>Early exposure to prescribing opportunity, time and structured support systems with medical supervision were essential in transition<sup>(129, 132-134, 136-139, 141, 148, 149)</sup>.</li> </ul>                                                                                                                                                                                                                                                                                                                                                                                                                                                                                                                                                                                                                          |
|                                                                                              |                                                                   | Communication & collaboration                                |                                                                                                                                                                                                                                                                                                                                                                                                                                                                                                                                                                                                                                                                                                                                                                                                                                                                                                                                                                                                                                                                                                                                                                                                                                                                      |
|                                                                                              |                                                                   | Expectations of training                                     |                                                                                                                                                                                                                                                                                                                                                                                                                                                                                                                                                                                                                                                                                                                                                                                                                                                                                                                                                                                                                                                                                                                                                                                                                                                                      |
| Analytical theme 4: Sustainment – maximising and developing independent prescribing          | Theme 2.1: Selecting the right practitioners                      | Selection                                                    | <ul style="list-style-type: none"> <li>IP could increase workload and imposed time constraints<sup>(132, 137-139, 141, 142, 148, 152)</sup>. Role underuse was a risk in community settings if infrastructural requisites (e.g., electronic prescribing/IT clinical record access) failed to be implemented<sup>(132, 134, 141, 142, 148, 149)</sup>.</li> <li>IP for service redesign and sustainability was facilitated by competence development, CPD opportunity and medical/managerial leadership<sup>(132, 133, 136, 139, 141, 142, 144, 146, 148, 149, 151, 152)</sup>.</li> <li>CPD provision and formal evaluation of IP implementation was inconsistent and lacked</li> </ul>                                                                                                                                                                                                                                                                                                                                                                                                                                                                                                                                                                              |
|                                                                                              |                                                                   | Skills & aptitudes                                           |                                                                                                                                                                                                                                                                                                                                                                                                                                                                                                                                                                                                                                                                                                                                                                                                                                                                                                                                                                                                                                                                                                                                                                                                                                                                      |
|                                                                                              |                                                                   | Motivation & commitment                                      |                                                                                                                                                                                                                                                                                                                                                                                                                                                                                                                                                                                                                                                                                                                                                                                                                                                                                                                                                                                                                                                                                                                                                                                                                                                                      |
| Analytical theme 4: Sustainment – maximising and developing independent prescribing          | Theme 2.2: Preparing and supporting practitioners during training | Expectations of training                                     | <ul style="list-style-type: none"> <li>IP could increase workload and imposed time constraints<sup>(132, 137-139, 141, 142, 148, 152)</sup>. Role underuse was a risk in community settings if infrastructural requisites (e.g., electronic prescribing/IT clinical record access) failed to be implemented<sup>(132, 134, 141, 142, 148, 149)</sup>.</li> <li>IP for service redesign and sustainability was facilitated by competence development, CPD opportunity and medical/managerial leadership<sup>(132, 133, 136, 139, 141, 142, 144, 146, 148, 149, 151, 152)</sup>.</li> <li>CPD provision and formal evaluation of IP implementation was inconsistent and lacked</li> </ul>                                                                                                                                                                                                                                                                                                                                                                                                                                                                                                                                                                              |
|                                                                                              |                                                                   | Study leave                                                  |                                                                                                                                                                                                                                                                                                                                                                                                                                                                                                                                                                                                                                                                                                                                                                                                                                                                                                                                                                                                                                                                                                                                                                                                                                                                      |
|                                                                                              |                                                                   | Designated Medical Practitioners                             |                                                                                                                                                                                                                                                                                                                                                                                                                                                                                                                                                                                                                                                                                                                                                                                                                                                                                                                                                                                                                                                                                                                                                                                                                                                                      |
| Analytical theme 4: Sustainment – maximising and developing independent prescribing          | Theme 3.1: Transition as a point of vulnerability                 | Self-confidence                                              | <ul style="list-style-type: none"> <li>IP could increase workload and imposed time constraints<sup>(132, 137-139, 141, 142, 148, 152)</sup>. Role underuse was a risk in community settings if infrastructural requisites (e.g., electronic prescribing/IT clinical record access) failed to be implemented<sup>(132, 134, 141, 142, 148, 149)</sup>.</li> <li>IP for service redesign and sustainability was facilitated by competence development, CPD opportunity and medical/managerial leadership<sup>(132, 133, 136, 139, 141, 142, 144, 146, 148, 149, 151, 152)</sup>.</li> <li>CPD provision and formal evaluation of IP implementation was inconsistent and lacked</li> </ul>                                                                                                                                                                                                                                                                                                                                                                                                                                                                                                                                                                              |
|                                                                                              |                                                                   | Minimum competence                                           |                                                                                                                                                                                                                                                                                                                                                                                                                                                                                                                                                                                                                                                                                                                                                                                                                                                                                                                                                                                                                                                                                                                                                                                                                                                                      |
|                                                                                              |                                                                   | Experience & exposure                                        |                                                                                                                                                                                                                                                                                                                                                                                                                                                                                                                                                                                                                                                                                                                                                                                                                                                                                                                                                                                                                                                                                                                                                                                                                                                                      |
| Analytical theme 4: Sustainment – maximising and developing independent prescribing          | Theme 3.2: Nurturing confidence & competence                      | Informal & formal support systems                            | <ul style="list-style-type: none"> <li>IP could increase workload and imposed time constraints<sup>(132, 137-139, 141, 142, 148, 152)</sup>. Role underuse was a risk in community settings if infrastructural requisites (e.g., electronic prescribing/IT clinical record access) failed to be implemented<sup>(132, 134, 141, 142, 148, 149)</sup>.</li> <li>IP for service redesign and sustainability was facilitated by competence development, CPD opportunity and medical/managerial leadership<sup>(132, 133, 136, 139, 141, 142, 144, 146, 148, 149, 151, 152)</sup>.</li> <li>CPD provision and formal evaluation of IP implementation was inconsistent and lacked</li> </ul>                                                                                                                                                                                                                                                                                                                                                                                                                                                                                                                                                                              |
|                                                                                              |                                                                   | Impact on workload                                           |                                                                                                                                                                                                                                                                                                                                                                                                                                                                                                                                                                                                                                                                                                                                                                                                                                                                                                                                                                                                                                                                                                                                                                                                                                                                      |
|                                                                                              |                                                                   | Role/service expansion                                       |                                                                                                                                                                                                                                                                                                                                                                                                                                                                                                                                                                                                                                                                                                                                                                                                                                                                                                                                                                                                                                                                                                                                                                                                                                                                      |
| Analytical theme 4: Sustainment – maximising and developing independent prescribing          | Theme 3.3: Transition support needs                               | Continued professional development                           | <ul style="list-style-type: none"> <li>IP could increase workload and imposed time constraints<sup>(132, 137-139, 141, 142, 148, 152)</sup>. Role underuse was a risk in community settings if infrastructural requisites (e.g., electronic prescribing/IT clinical record access) failed to be implemented<sup>(132, 134, 141, 142, 148, 149)</sup>.</li> <li>IP for service redesign and sustainability was facilitated by competence development, CPD opportunity and medical/managerial leadership<sup>(132, 133, 136, 139, 141, 142, 144, 146, 148, 149, 151, 152)</sup>.</li> <li>CPD provision and formal evaluation of IP implementation was inconsistent and lacked</li> </ul>                                                                                                                                                                                                                                                                                                                                                                                                                                                                                                                                                                              |
|                                                                                              |                                                                   | Evaluation & Reflection                                      |                                                                                                                                                                                                                                                                                                                                                                                                                                                                                                                                                                                                                                                                                                                                                                                                                                                                                                                                                                                                                                                                                                                                                                                                                                                                      |
|                                                                                              |                                                                   | Role/service expansion                                       |                                                                                                                                                                                                                                                                                                                                                                                                                                                                                                                                                                                                                                                                                                                                                                                                                                                                                                                                                                                                                                                                                                                                                                                                                                                                      |

MainDocumentV2.0\_19112021

1  
2  
3  
4  
5  
6  
7  
8  
9  
10  
11  
12  
13  
14  
15  
16  
17  
18  
19  
20  
21  
22  
23  
24  
25  
26  
27  
28  
29  
30  
31  
32  
33  
34  
35  
36  
37  
38  
39  
40  
41  
42  
43  
44  
45  
46

|  |  |  |                                                                                                                                                                                                                                                                                                                                                                                                  |
|--|--|--|--------------------------------------------------------------------------------------------------------------------------------------------------------------------------------------------------------------------------------------------------------------------------------------------------------------------------------------------------------------------------------------------------|
|  |  |  | standardisation in primary care <sup>(132, 138, 142, 149, 152)</sup> . <ul style="list-style-type: none"><li>• 'Enhancement', 'substitution', and 'role specific' implementation models based on the maintenance or change in prescribing competence, service reconfiguration and/or substitution of services were identified<sup>(132, 139, 141, 142, 144, 146, 148, 149, 151)</sup>.</li></ul> |
|--|--|--|--------------------------------------------------------------------------------------------------------------------------------------------------------------------------------------------------------------------------------------------------------------------------------------------------------------------------------------------------------------------------------------------------|

CPD – continued professional development, DMPs – designated medical practitioners, GPs – general practitioners, IP – independent prescribing, IPs – independent prescribers, NMP – non-medical prescribing

For peer review only

MainDocumentV2.0\_19112021

**Analytical theme 1: Preparation – organisational readiness for implementation**

This analytical theme refers to barriers and facilitators influential to the planning phase of implementation which related to the service need and relative advantage of implementing IP, the need for consistent managerial leadership and an inter-professional environment that was conducive to team implementation.

**Descriptive Theme 1.1: Clarifying need and advantage of implementing independent prescribing**

Identifying shortfalls in existing medicines pathways and how IP could fill service gaps were key steps in this stage. Studies described a highly qualified, specialist nursing and pharmacy workforce delivering unscheduled, scheduled and out-of-hours services<sup>(132, 134-139, 141, 142, 144, 146, 148, 150-152)</sup> who routinely made autonomous clinical decisions necessitating prescribing and medicines optimisation skills<sup>(129, 135-137, 142, 148, 150, 152)</sup>. IP held tangible advantage over former methods of accessing prescribed medicines which involved request, referral and/or the counter-signing of prescriptions by doctors. Subject to GP workload<sup>(134, 144, 146)</sup> and constrained availability<sup>(142, 144, 146, 148)</sup>, these methods were labour intensive<sup>(142-144, 146, 148)</sup>, inefficient<sup>(138, 142, 143, 148)</sup>, and burdened services and patients through the need for additional healthcare contacts<sup>(135, 139, 141, 143, 144, 148, 150)</sup>. By removing the need for doctor input, IP improved responsiveness with respect to medicines<sup>(135, 137, 141, 142, 144, 146, 148, 150)</sup>, enhanced care quality<sup>(132, 144, 148)</sup>, and helped prevent adverse outcomes<sup>(142)</sup>.

Lack of team clarity and transparency on IP role intentions were persistent barriers to implementation<sup>(139, 141, 142, 144, 146, 148, 149, 151)</sup>. Poor team understanding of IP could limit integration<sup>(151)</sup> and promote role ambiguity<sup>(151)</sup> or misuse<sup>(132, 138, 142, 149)</sup>. Consultative team stakeholder processes facilitated clarification of current medicines pathways bottle necks<sup>(146)</sup>, helped cement clinical advantage of IP<sup>(146)</sup> and encouraged a collective understanding of implementation<sup>(144, 146, 151)</sup>. Conversely, if existing medicines pathways were perceived to be expedient and IP held limited advantage, adoption was less likely<sup>(143, 145)</sup>.

**Descriptive Theme 1.2: Managerial leadership and support**

Lack of managerial leadership and support were highly cited barriers to implementation that persisted across the review decade. Nurse/pharmacist prescribers reported stage specific and on-going funding<sup>(130, 143, 145)</sup>, training<sup>(131, 132, 134, 138, 139, 141, 142, 149)</sup> and infrastructural needs<sup>(132, 134, 141, 142, 148, 149)</sup> that extended across the IP implementation trajectory. Managerial support was, however, frequently reported to diminish post-adoption<sup>(130-132, 134, 138, 139, 141-143, 145, 148, 149)</sup> and many practitioners believed managers lacked knowledge about IP<sup>(132, 138, 139, 143, 145)</sup> or misunderstood its potential for improving service quality<sup>(132, 145)</sup>. Nurses/pharmacists

MainDocumentV2.0\_19112021

1  
2  
3 ascribed high value to IP for improving service efficiency<sup>(137, 138, 141, 142, 148, 149)</sup> and skill  
4 utilisation<sup>(132, 134, 138, 142)</sup>, perceiving it extended clinical knowledge beyond prescribing<sup>(132, 134,</sup>  
5 <sup>142, 148)</sup>, enhanced clinical confidence<sup>(132, 139, 141, 142, 148)</sup> and job satisfaction<sup>(138, 141, 148)</sup>, and  
6 facilitated team education<sup>(132, 144, 151)</sup>. They perceived themselves a unique workforce  
7 resource with potential for better mobilisation in under-resourced areas (e.g., mental  
8 health)<sup>(132)</sup>. However, there was a perception that management lacked appreciation of  
9 primary care workforce aspirations for IP<sup>(145)</sup> and overlooked its scope<sup>(132, 143, 145)</sup>. Better  
10 recognition and commitment were considered essential for leveraging and driving IP  
11 services forward<sup>(132)</sup>.  
12  
13  
14  
15  
16  
17  
18

19 Ensuring teams understood IP and its role within care delivery mitigated subsequent  
20 barriers<sup>(138, 139, 142, 151)</sup> and was critical for implementation success<sup>(139, 141, 142, 144, 146, 148, 149, 151)</sup>.  
21 Doctors, receptionists<sup>(138, 139, 151)</sup>, dispensing pharmacists<sup>(148, 151)</sup>, and peer colleagues<sup>(141, 148,</sup>  
22 <sup>149, 151)</sup> all played supervisory and/or infrastructural roles in IP implementation and  
23 understanding the need for this input was essential. While staff clarity on their roles in  
24 relation to IP positively influenced willingness to provide enabling supports such as clinic  
25 administration<sup>(138, 151)</sup>, record access<sup>(146)</sup>, and clinical supervision/pharmaceutical advice<sup>(142,</sup>  
26 <sup>148)</sup> lack of team understanding of IP was a barrier that was cited repeatedly across the  
27 review decade<sup>(134, 138, 139, 141, 142, 145, 146, 148, 149, 151)</sup>.  
28  
29  
30  
31  
32  
33

### 34 **Descriptive Theme 1.3: Inter-professional environment**

35 Respectful, trusting inter-professional relationships promoted an appreciation of different  
36 professional skill sets<sup>(151)</sup>, helped ratify the purpose of IP<sup>(129, 151)</sup> and built team confidence in  
37 the prescribing competence of nurses and pharmacists<sup>(129, 142)</sup>. Good relationships facilitated  
38 information transfer<sup>(142)</sup>, promoted supervision provision<sup>(149, 151)</sup>, shared learning<sup>(129)</sup> and team  
39 working<sup>(151)</sup>. Acceptance and positive attitudes towards IP as a shared skill were facilitative  
40 to implementation<sup>(144, 146, 151)</sup> and mitigated the likelihood of “turf wars” emerging if IP roles  
41 was perceived to encroach on professional territories<sup>(151)</sup>. While many nurses/pharmacists  
42 reported positive relationships with doctors<sup>(139, 141, 142, 148, 151)</sup>, others described jurisdictional  
43 tensions over prescribing authority<sup>(139, 145, 151)</sup>. Building trust for IP where relationships were  
44 weak took time<sup>(144)</sup> and given the important supervisory role of doctors in IP<sup>(132, 134, 138, 141, 142,</sup>  
45 <sup>148, 149)</sup>, consideration of their strength in adoption planning is pertinent. Good communication  
46 networks were more likely where established relationships and positive attitudes towards IP  
47 prevailed<sup>(142, 151)</sup>, and were important for imparting information to teams about IP <sup>(138, 144, 146)</sup>,  
48 for developing supervision and peer support<sup>(142, 148)</sup> and promoting teamwork<sup>(146, 151)</sup>.  
49  
50  
51  
52  
53  
54  
55  
56  
57  
58  
59  
60

MainDocumentV2.0\_19112021

## **Analytical theme 2: Training – optimising practitioner readiness for independent prescribing**

This analytical theme refers to the extent to which organisations select and prepare the right practitioners for IP training, as well as how they support and maximise students' learning experiences.

### **Descriptive Theme 2.1: Selecting the right practitioners**

Overall, strategic planning for IP workforce selection lacked scrutiny, and practitioner choice<sup>(130, 132, 138)</sup>, expectation of improved job satisfaction<sup>(138, 145, 148)</sup>, efficiency and patient benefit<sup>(130, 138)</sup> were the primary drivers for implementation across the review period. Training course drop out<sup>(130)</sup> and failure to prescribe following training<sup>(132, 134)</sup>, suggest a need to ensure selection procedures match skills and capabilities to IP and increase the chances of organisational return on IP training investment. Synthesis identified essential skills<sup>(132, 135, 137, 138, 140, 148, 150, 152)</sup> and personal motivation<sup>(130, 132)</sup> as important considerations. Study demographic data indicated a clinically experienced workforce<sup>(132, 138, 139, 148, 149)</sup>, with degree/higher degree educational and/or specialist skills attainment<sup>(130, 135, 142, 150)</sup>. Advanced physical assessment and clinical specialty skills not only suggested expertise and theoretical knowledge to underpin IP but were also recognised by patients as important contributors to care quality<sup>(135, 140, 150)</sup>. Patients reported high levels of confidence in IP led care, with the caveat that prescribers demonstrated knowledge and expertise<sup>(135, 140, 150)</sup>. Good interpersonal, communication, examination, history taking and diagnostic skills were key. These were mandatory for differential diagnosis<sup>(135-137, 150, 152)</sup> and holistic management<sup>(138, 148, 152)</sup>, for conferring practitioner prescribing/non-prescribing decisions<sup>(136, 137, 152)</sup> and managing treatment concordance<sup>(132, 135, 137, 140, 146, 150, 152)</sup> and patient expectations for medicines<sup>(136, 137, 152)</sup>. Motivational deterrents to IP uptake that were identified by non-prescribing nurses<sup>(145)</sup> and physiotherapists<sup>(143)</sup> were being near retirement<sup>(145)</sup>, a reluctance to undertake further advanced training<sup>(143, 145)</sup>, concerns about training rigor<sup>(143)</sup>, and a perception of effort/remuneration imbalance<sup>(143, 145)</sup>. Although IP job satisfaction and professional benefits were considered future adoption drivers<sup>(145)</sup> lack of financial remuneration in particular disincentivised practice nurse<sup>(145)</sup> and physiotherapy adoption<sup>(143)</sup>.

### **Descriptive Theme 2.2: Preparing and supporting practitioners during training**

UK non-medical prescribing training programmes employ profession-specific or inter-professional models, delivering 26 days equivalent fulltime education alongside a supervised learning in practice period<sup>(129)</sup>. Given the onus for safe prescribing, programmes were reported by students and nurse/pharmacist prescribers to be academically rigorous<sup>(131, 148)</sup>. There was evidence however that students lacked key knowledge about generic training

MainDocumentV2.0\_19112021

1  
2  
3 models<sup>(145)</sup>, the learning expectations of different pedagogies<sup>(129)</sup>, as well as course  
4 assessment and portfolio requirements<sup>(130)</sup>. Expecting narrower, speciality specific rather  
5 than generic training was common<sup>(130, 148)</sup>. Students found the academic demands of training  
6 whilst continuing their usual clinical duties challenging indicating a need to better balance  
7 work, personal and academic commitments<sup>(129, 131)</sup>. The degree of allocated support time<sup>(130,</sup>  
8 <sup>131)</sup> and the quality of mentoring during supervised practice learning<sup>(129)</sup> were key influences  
9 on student learning experiences. Adequate study leave, protected time and backfill  
10 respectively optimised study time, reduced personal time encroachment and negated the  
11 need to absorb usual role duties whilst training<sup>(130)</sup>. Despite organisational requirement to  
12 confirm study leave arrangements pre-training, primary care allocation was highly  
13 unstandardised, with some students entering training without a confirmed agreement<sup>(130)</sup>.  
14 Prepared practice mentors with clarity on their role obligations in general provided a higher  
15 level of input to students<sup>(129)</sup>, and good mentor-student relationships that continued post-  
16 training facilitated transition<sup>(134)</sup>. Additional training buddying schemes helped students better  
17 manage the competing demands of training whilst working, although time constraints limited  
18 their uptake<sup>(131)</sup>.

### **Analytical theme 3: Transition – ensuring early prescribing support**

19  
20 This analytical theme highlighted the importance of the post-qualification transition period in  
21 the development of prescribing confidence/competence and identified a high need for  
22 supervision and informal and formal support. Delineating the scope of prescribing  
23 competence facilitated early implementation.

#### **Descriptive Theme 3.1: Transition as a point of vulnerability**

24  
25 Many nurses/pharmacists held vivid memories of anxiety and fear during their first IP  
26 encounters<sup>(139, 141, 142, 148, 149)</sup>, reporting a diminution of self-confidence during the early  
27 transition period<sup>(137, 139, 141, 142, 148, 149)</sup>. This finding traversed the review decade and was  
28 unrelated to how prepared prescribers felt by training<sup>(139, 148)</sup>. Heightened awareness of the  
29 risks of error<sup>(149)</sup>, the cautionary approach instilled by training<sup>(139, 149)</sup>, and liability for personal  
30 accountability<sup>(141, 148)</sup> fuelled feelings. It was recognised that self-confidence and competence  
31 development were essential for prescribing<sup>(139, 149)</sup> and mitigated anxiety<sup>(148)</sup>, but were highly  
32 dependent on exposure to prescribing opportunities<sup>(148, 149)</sup>, time<sup>(139, 149)</sup> and above all, the  
33 level of available support<sup>(129, 134, 141, 148, 149)</sup>. Without a channel for accessing supervision,  
34 nurses/pharmacists could doubt competence, lose confidence and defer from  
35 prescribing<sup>(149)</sup>. This led to a lack of competence development and underutilisation of IP<sup>(149)</sup>  
36 and suggests that greater acknowledgement of transitional developmental needs is  
37 necessary.

MainDocumentV2.0\_19112021

### **Descriptive Theme 3.2: Nurturing competence and confidence**

Establishing competence boundaries and recognising personal limitations were important enablers in transition<sup>(139, 149)</sup>. Nurse/pharmacist prescribers defined competence as the immediate clinical areas in which they had the knowledge and confidence to prescribe<sup>(138, 139, 141, 142, 149, 151)</sup>. Delineating individual scope of prescribing practice by restricting the range of medicines prescribed to circumscribed clinical areas<sup>(138, 142, 148, 151)</sup> in line with clinical guidelines and protocols<sup>(139)</sup> encouraged the early development of competence<sup>(149)</sup>. Alternatively, prescribing outside these boundaries<sup>(139)</sup>, as in complex polypharmacy or comorbidity<sup>(134, 142)</sup>, was deemed risky, unsafe and unprofessional<sup>(138, 149, 151)</sup>. Nurses/pharmacists reported that teams often failed to recognise their self-confidence issues related to competence<sup>(142)</sup>, and exerted inappropriate expectations for IP<sup>(134, 138, 139)</sup>. Recognising that as a new skill, development of prescribing competence was time and opportunity dependent<sup>(139, 148, 149)</sup> several nurses expressed anxiety that prescribing skills would diminish during transition if not utilised<sup>(148)</sup>.

### **Descriptive Theme 3.3: Transition support needs**

Reports of poor transition support pervaded the review decade<sup>(132, 134, 137, 138, 141, 142, 148, 149)</sup> and there was limited evidence of pre-emptive, formalised supervision provision<sup>(134)</sup>. Nurses reported this absence as immediately impactful<sup>(141)</sup>, especially in isolated roles and in services with few prescribers<sup>(132, 149)</sup>. While nurses and pharmacists desired structured and informal supervision<sup>(142, 149)</sup>, in all 7 studies addressing this theme<sup>(132, 134, 138, 141, 142, 148, 149)</sup>, most could only access a variable level of informal support. "Open door" contemporaneous advice given by GPs was the primary source, although specialist doctors, peers and pharmacists were also consulted. Team receptiveness to providing this mentoring<sup>(149)</sup>, its reliability<sup>(137, 141)</sup> and accessibility<sup>(148, 149)</sup> were key facilitators. Informal opportunities for discussion provided security<sup>(149)</sup> and were valued<sup>(138, 141, 148, 149)</sup>. Exemplifying barrier interdependence, lack of mentoring relationships with doctors limited opportunity for informal support, prevented prescribing and limited competence with specific medicines or clinical conditions<sup>(149)</sup>. In turn this necessitated re-engagement of GP referral for prescribing and culminated in inequitable patient medicines management<sup>(142, 149)</sup>. To address shortfalls in formal support provision, several prescribers set up local peer networks<sup>(134, 138, 142)</sup>, however a strong desire for formalised mentorship was expressed<sup>(132, 138, 142, 149)</sup>.

MainDocumentV2.0\_19112021

## **Analytical theme 4: Sustainment – maximising and developing independent prescribing**

This analytical theme describes barriers and facilitators within the descriptive sub-themes of service delivery and supporting role development, which relate to how IP was used and maximised in primary care.

### **Descriptive Theme 4.1: Service delivery**

Prescribers reported that IP promoted efficient, streamlined services<sup>(138, 139, 141, 142, 144, 148)</sup>. However, views on how it impacted individual practitioner workload differed<sup>(138, 139, 141, 142, 148, 149)</sup>. IP reportedly lengthened consultations<sup>(132, 138)</sup>, added administrative tasks<sup>(141, 148)</sup> and increased job-related stress<sup>(138)</sup>. Undertaking in-depth holistic assessment to inform prescribing needs imposed time constraints<sup>(132, 152)</sup>, which were exacerbated in strict ten-minute clinic allocation systems<sup>(137, 138)</sup>. Additional time and experience could however be mitigating<sup>(137, 152)</sup>. Community IPs reported their main workload barriers as administrative and related to absent or incompatible electronic record and prescription generation systems<sup>(134, 141, 142, 148, 149, 152)</sup>. Seeking clinical information caused significant delays, in some cases causing IPs to revert to GP referral for prescribing needs<sup>(134, 141, 148, 149)</sup>. However, recent IT accessibility was suggested to mitigate retrieval problems<sup>(146)</sup>.

Attitudes towards role change because of IP also influenced perceptions about workload<sup>(138, 139)</sup>. Some prescribers perceived that GPs abdicated responsibility for prescribing following introduction of IP<sup>(148)</sup> which increased workload and job demand<sup>(138, 139)</sup>. Prescribers negatively referred to this as work offloading<sup>(139)</sup> and were suspicious of underpinning financial motives<sup>(145)</sup>. Alternatively, other prescribers viewed the benefits of IP at a broader service level and as an opportunity to reduce GP colleague workforce pressures<sup>(134, 146, 148)</sup>. While GPs in one study stressed that their acceptance of pharmacist IP rested on whether it increased existing workload<sup>(144)</sup> limited team member involvement within studies precluded synthesis of wider primary care workload impact of IP.

### **Descriptive Theme 4.2: Supporting role development**

Despite limited contextual detail on workforce planning<sup>(132, 146, 151)</sup>, three broadly categorised “models” of IP implementation were identified. The first “*Enhancement*” model introduced IP to enhance the efficiency of existing nurse/pharmacist roles without changing the pattern of service provision, client group or condition complexity<sup>(139, 141, 142, 149, 151)</sup>. The second “*Substitution*” model adapted existing IP roles to directly substitute or replace GP services, which required some level of structural re-organisation of care and/or a change in core prescribing competence<sup>(132, 141, 144, 146, 148)</sup>, (e.g., substituting GPs in out-of-hours palliative care services and additionally managing non-cancer terminal illness<sup>(148)</sup>). The final, less



MainDocumentV2.0\_19112021

frequently evidenced “*Role specific*” model created new roles specifically for pharmacist prescribers, for which geriatric chronic disease and co-morbidity management were new areas of competence, and in which pharmacists assumed a transfer of responsibility from GPs for care home medicines management<sup>(144, 146)</sup>. One study found that the specific models of employment/funding influenced how well IP roles were integrated<sup>(151)</sup>, with direct GP practice employment as opposed to commissioned PCT funded roles creating greater sense of permanence, better role use, and enhanced team involvement. This was assumed to result from improved relationships, trust and team building<sup>(144, 146)</sup>.

A strategic top-down approach to implementation of IP was unclear from the reviewed studies, and overall an individual practitioner, bottom-up approach appeared to drive adoption. However, there was some evidence that where skill mix was recognised and valued within services<sup>(146, 151)</sup>, CPD was readily available<sup>(151)</sup> and doctors provided leadership<sup>(139, 151)</sup> IP was used to greater extent for primary care redesign and service sustainability. Absent policy and national targets restrained IP resource allocation<sup>(132)</sup>, whilst policy and national guidance was facilitative<sup>(144, 146)</sup>. Doctors also imposed constraints on IP by limiting clinical caseloads<sup>(139, 149)</sup>, restricting formularies<sup>(134, 151)</sup> or by retaining sole diagnostic prescribing responsibility for patients<sup>(132, 146)</sup>. For some prescribers, competence expansion was synonymous with crossing job descriptions and mandated formal negotiation with employers<sup>(149)</sup>.

Provision of CPD overall was inconsistent, untargeted to evolving learning needs<sup>(138, 149)</sup>, and prescribers identified pharmacology<sup>(141)</sup>, statutory drug updates<sup>(138)</sup> as key topics. Lack of confidence with heart failure<sup>(142)</sup>, mental health conditions<sup>(132)</sup>, polypharmacy and off-label prescribing<sup>(149)</sup> suggested CPD in co-morbidities warranted further input. Trust provision included forums/meetings<sup>(138, 142)</sup>, commissioned training, national conference attendance<sup>(141, 151)</sup> and electronic journal resources<sup>(141)</sup>. However, provision varied widely and with few prescribers reporting accessible CPD systems<sup>(138, 142)</sup>, there was agreement that improved implementation was necessary<sup>(132, 138, 141, 142, 149, 152)</sup>.

With time and input to create support systems<sup>(142)</sup> and enhance communication concerning role boundaries<sup>(148)</sup> prescribers reported that IP integration improved. However, formal evaluation following implementation was rare<sup>(134)</sup>, with only two studies<sup>(137, 152)</sup> identifying quality assurance activities such as audit and local/national data benchmarking in the context of antibiotic stewardship.

## Discussion

The future of UK primary care is reliant on workforce expansion and introduction of new first-contact non-medical roles<sup>(27, 153-156)</sup>. Ensuring practitioners have the right skills to enable sustainable service development, at scale and pace is key<sup>(157, 158)</sup>. Recent reports of rising non-medical prescriber numbers in some regions of the UK<sup>(30, 79, 159)</sup> suggest healthcare providers are recognising the value of prescribing for skill-mix and workforce transformation. Ensuring implementation is optimised, sustained and IP roles are maximised for service and patient benefit is essential.

This is the first meta-synthesis evaluating barriers and facilitators to the implementation of IP by non-medical healthcare professionals in primary care. Guided by theory, synthesis of factors across a continuum of implementation provides a temporal dimension and insight into three primary '*enhancement*', '*substitution*', and '*role specific*' models of implementation that previous UK systematic reviews lack<sup>(54, 68, 69, 74)</sup>. In its infancy in UK primary care non-medical prescribing research<sup>(137, 146, 160, 161)</sup>, implementation theory is likely to become increasingly important for informing implementation strategies as the governance arrangements for extended prescribing rights grow in complexity<sup>(159)</sup> and the socio-political primary care landscape continues to change<sup>(162)</sup>.

From stakeholders' experiences of implementing IP, barriers and facilitators were identified in four key analytical themes: '*Preparation*', '*Training*', '*Transition*' and '*Sustainment*'. While some interdependence and overlap is acknowledged, these themes present a stage based road map of barriers and facilitators for consideration in future implementation.

In the theme '*Preparation*', the importance of organisational readiness for implementing IP was reflected by a need for consistent managerial leadership/support, improved team understanding of prescribing role intentions and an interprofessional environment that supports novice prescribers. While nurses and pharmacists considered IP integral to advanced practice and essential to enhance workforce skill utilisation there was concern that it lacked strategic prominence in primary care. Accordingly, the '*Training*' theme identified a need for improved managerial recognition of primary care workforce aspirations for IP along with a need to ensure skills and motivations matched those necessary for training. In line with national reports<sup>(43, 46, 55)</sup>, the response to the non-medical prescribing agenda has been sluggish in some UK regions<sup>(59)</sup>, with reforms to commissioning either marginalising<sup>(59)</sup> or fragmenting its funding<sup>(110, 163)</sup>. Moreover, in common with national evaluations<sup>(43, 59, 164, 165)</sup>, this synthesis identified a continuing practitioner led implementation of IP with largely voluntary uptake. Contrary to secondary care<sup>(62)</sup>, there was limited evidence<sup>(144, 146)</sup> for policy driven service design or targeted strategy embedding IP within career or service pathways. This suggests a disjointed approach to implementation that may reflect the rapidly changing

MainDocumentV2.0\_19112021

1  
2  
3 policy and service context of UK primary care<sup>(166-168)</sup>. However, with a third of the non-  
4 medical general practice workforce near retirement age<sup>(169)</sup>, and succession of IP roles  
5 lacking guarantee<sup>(151)</sup>, sustainability of non-medical prescribing capability is a key concern  
6 for future management of primary care patient medicines needs<sup>(170)</sup>.  
7  
8

9  
10 Transition was identified as a key stage in implementation that warrants greater scrutiny and  
11 has resonance for professions such as paramedics who are new to prescribing. While its  
12 affective nature<sup>(171, 172)</sup> and need for bespoke support systems has been previously  
13 recognised<sup>(173, 174)</sup>, few studies have specifically sampled novice prescribers<sup>(172, 175)</sup> to  
14 ascertain optimal supervisory requirements<sup>(171)</sup>. Despite extension of IP rights to  
15 optometrists, physiotherapists, radiographers, podiatrists and paramedics over the past  
16 thirteen years, focus on implementation issues during transition within each profession has  
17 been limited<sup>(43, 176, 177)</sup>. This is likely to be especially important for paramedics who, awarded  
18 IP rights in 2018 have not been subject to the supplementary prescribing lead in period that  
19 characterises other professions<sup>(178)</sup> and who are historically less well established in the  
20 primary care workforce<sup>(179, 180)</sup>. Early data suggesting challenges around role isolation, team  
21 expectations of paramedic IP and lack of legislative parity for controlled drugs warrants  
22 further exploration to determine whether paramedics too, face similar barriers identified by  
23 this review<sup>(177, 181)</sup>.  
24  
25  
26  
27  
28  
29  
30  
31  
32  
33

34 In common with other UK reviews<sup>(68, 69)</sup>, limited overall focus on long-term sustainability or  
35 strategy for implementation at either local, regional or national level was found. This was  
36 echoed by the dominance of the '*enhancement*', as opposed to '*role specific*' implementation  
37 models identified and may reflect the multiple changes made to policy<sup>(182)</sup>, leadership<sup>(183)</sup> and  
38 commissioning<sup>(184)</sup> and the on-going embedding of new governance structures within primary  
39 care<sup>(185)</sup>. Of note, despite finding a need for more cohesive managerial support that extends  
40 across the entire implementation trajectory, minimal reference was made to the championing  
41 and change agent functions of non-medical prescribing leads<sup>(173, 174)</sup>. The Department of  
42 Health has long recommended implementation of non-medical prescribing under direction of  
43 a designated lead with strategic, operational and governance footholds<sup>(33)</sup>. A lack of  
44 representation in recent regional research<sup>(159)</sup> supports the tenet that many of these roles  
45 were not replaced in England following the abolition of primary care trusts<sup>(174)</sup>. Successful  
46 implementation is more likely when champions are fully organisationally supported<sup>(186)</sup> and  
47 provide sustained input to implementation activities<sup>(173, 187, 188)</sup>. However, a lack of role  
48 infrastructure, clarity and designated time<sup>(159, 174)</sup>, along with the increasingly diverse non-  
49 medical prescribing workforce is challenging this important role. While other models of  
50 primary care workforce mentoring show promise<sup>(189)</sup>, the repetition and frequency of barriers  
51  
52  
53  
54  
55  
56  
57  
58  
59  
60

MainDocumentV2.0\_19112021

1  
2  
3 exposed by this synthesis over the review decade indicate urgent need for a more cohesive  
4 approach to supporting IP.  
5  
6

### 7 **Strengths and limitations**

8  
9 This review strengthens the UK evidence base by identifying challenges to IP  
10 implementation in traditional and contemporary primary care contexts. Using comprehensive  
11 search strategies and robust analysis methods, it highlights factors during '*Preparation*',  
12 '*Training*', '*Transition*' and '*Sustainment*' stages which can be used by practitioners and  
13 policymakers to identify areas for improving implementation support.  
14  
15  
16

17  
18 Although limited to UK literature, the theoretical lens ensured focus on common factors  
19 known to facilitate implementation (e.g., the need for leadership and championing) which are  
20 generalisable to any implementation context, either in the UK or internationally. We did not  
21 however include grey literature and although qualitative synthesis enabled rich description of  
22 elements perceived by stakeholders to influence implementation of IP in the UK, reviews that  
23 include quantitative literature in primary care are encouraged. Our focus on primary care  
24 excluded barriers and facilitators that may be unique to acute care and other settings.  
25 Moreover, as the non-medical prescribing agenda is disseminated across the NHS, it will be  
26 increasingly important to consider the theoretical basis for developing strategies to achieve  
27 more successful implementation of this complex innovation in different professions<sup>(67, 119, 190)</sup>.  
28  
29  
30  
31  
32  
33  
34  
35

### 36 **Conclusion**

37 Globally, healthcare systems are implementing strategies to address workforce deficits that  
38 enhance the skills of nurses, pharmacists and other non-medical healthcare professionals.  
39 Integral to advanced scope of practice, it is imperative that IP capability is optimised through  
40 successful implementation. This meta-synthesis has identified persistent barriers at the  
41 '*Preparation*', '*Training*', '*Transition*' and '*Sustainment*' stages of implementation. A more  
42 coordinated and targeted approach to overcome barriers identified in these stages is key to  
43 ensuring that IP is an effective approach to helping alleviate workforce shortfalls in the UK,  
44 and around the world.  
45  
46  
47  
48  
49  
50

### 51 **Contributors**

52 JE and NC conceived the study. JE obtained funding, oversaw all aspects of the project and  
53 contributed to all stages. JE drafted this paper. JE designed and executed all the searches,  
54 data extraction, coding, and quality appraisal. NC contributed to all stages of the review,  
55 including data extraction and coding. MC and NC contributed to the evolving synthesis and  
56 formulation of conclusions.  
57  
58  
59  
60

MainDocumentV2.0\_19112021

1  
2  
3  
4  
5 **Funding**

6 This work was supported by a University of Surrey Doctoral Scholarship 2018-2021 award  
7 (6522700).  
8

9  
10 **Competing interests** None declared.

11 **Data sharing statement** No additional data are available.

12 **Patient consent for publication** Not required.

13 **Research Ethics Approval** Not applicable.

14 **Provenance and peer review** Not commissioned, externally peer reviewed.  
15  
16  
17  
18  
19  
20  
21  
22  
23  
24  
25  
26  
27  
28  
29  
30  
31  
32  
33  
34  
35  
36  
37  
38  
39  
40  
41  
42  
43  
44  
45  
46  
47  
48  
49  
50  
51  
52  
53  
54  
55  
56  
57  
58  
59  
60

For peer review only

MainDocumentV2.0\_19112021

1. Dugani S, Veillard J, Evans T. Quality primary health care will drive the realization of universal health coverage. *Can Med Assoc J* 2018;**190**:E453-E454. doi:10.1503/cmaj.180186
2. Kluge H, Kelley E, Swaminathan S, *et al*. After Astana: building the economic case for increased investment in primary health care. *Lancet* 2018;**392**:2147-2152. doi:10.1016/s0140-6736(18)32859-9
3. The King's Fund. The health care workforce in England. Make or break? London: The King's Fund, 2018.
4. Stenberg K, Hanssen O, Bertram M, *et al*. Guide posts for investment in primary health care and projected resource needs in 67 low-income and middle-income countries: a modelling study. *Lancet Glob Health* 2019;**7**:e1500-e1510. doi:10.1016/S2214-109X(19)30416-4
5. World Health Organization & United Nations Children's Fund (UNICEF). Operational framework for primary health care: transforming vision into action. Geneva: World Health Organization, 2020.
6. Barnett K, Mercer SW, Norbury M, *et al*. Epidemiology of multimorbidity and implications for health care, research, and medical education: a cross-sectional study. *Lancet* 2012;**380**:37-43. doi:10.1016/S0140-6736(12)60240-2
7. Stafford M, Steventon A, Thorlby R, *et al*. Briefing: Understanding the health care needs of people with multiple health conditions. London: The Health Foundation, 2018.
8. Kingston A, Robinson L, Booth H, *et al*. Projections of multi-morbidity in the older population in England to 2035: estimates from the Population Ageing and Care Simulation (PACSim) model. *Age Ageing* 2018;**47**:374–380. doi:10.1093/ageing/afx201
9. Smith SM, Wallace E, O'Dowd T, *et al*. Interventions for improving outcomes in patients with multimorbidity in primary care and community settings. *Cochrane Database Syst Rev* 2016;**4**:CD006560. doi:10.1002/14651858.CD006560.pub3.
10. World Health Organization. Multimorbidity: Technical Series on Safer Primary Care. Geneva: World Health Organization, 2016.
11. Lim J, Broughan J, Crowley D, *et al*. COVID-19's impact on primary care and related mitigation strategies: A scoping review. *Eur J Gen Pract* 2021;**27**:166-175. doi:10.1080/13814788.2021.1946681
12. Greenhalgh T, Knight MA, Court C, *et al*. Management of post-acute covid-19 in primary care. *BMJ* 2020;**370**: m3026. doi:10.1136/bmj.m3026 pmid:32784198
13. Julia C, Yohan Saynac Y, Le Joubioux C, *et al*. Organising community primary care in the age of COVID-19: challenges in disadvantaged areas. *Lancet* 2020;**5**:e313. doi:10.1016/S2468-2667(20)30115-8
14. Pettigrew LM, Kumpunen S, Mays N. Primary care networks: the impact of covid-19 and the challenges ahead. *BMJ* 2020;**370**:m3353. doi:10.1136/bmj.m3353
15. Williams S, Tsiligianni I. COVID-19 poses novel challenges for global primary care. *NPJ Prim Care Respir Med* 2020;**30**:30. doi:10.1038/s41533-020-0187-x
16. IQVIA Institute for Human Data Science. Global Medicine Spending and Usage Trends: Outlook to 2024. New York: IQVIA Institute for Human Data Science, 2020.
17. Avery A, Barber N, Ghaleb M, *et al*. Investigating the Prevalence and Causes of Prescribing Errors in General Practice: The PRACTICE Study: General Medical Council, 2012.
18. World Health Organization. Declaration of Astana. Global Conference on Primary Health Care: from Alma-Ata towards universal health coverage and the Sustainable Development Goals. Kazakhstan, Geneva, New York World Health Organisation and the United Nations Children's Fund, 2018.
19. Osborn R, Moulds D, Schneider EC, *et al*. Primary Care Physicians In Ten Countries Report Challenges Caring For Patients With Complex Health Needs. *Health Aff (Millwood)* 2015;**34**:2104–2112. doi:10.1377/hlthaff.2015.1018

MainDocumentV2.0\_19112021

20. Rosen R, Parker H. New models of primary care: practical lessons from early implementers. London: Nuffield Trust, 2013.
21. Ham C, Heenan D, Longley M, *et al*. Integrated care in Northern Ireland, Scotland and Wales. Lessons for England. London: The King's Fund, 2013.
22. Mercer SW, Gillies J, Noble-Jones R, *et al*. National Evaluation of New Models of Primary Care in Scotland. Glasgow: Scottish School of Primary Care, 2019.
23. NHS England. Integrating care. Next steps to building strong and effective integrated care systems across England. London: NHS England, 2020.
24. Welsh Government. Our plan for a primary care service for Wales up to March 2018: NHS Wales, 2015.
25. Morciano M, Checkland K, Hammond J, *et al*. Variability in size and characteristics of primary care networks in England: observational study. *Br J Gen Pract* 2020;**70**:e899-e905. doi:10.3399/bjgp20X713441
26. Department of Health. The NHS Long Term Plan. London, UK: Department of Health, 2019.
27. The King's Fund. Primary care networks explained. London: The King's Fund, 2020.
28. UK Parliament. Health and Care Bill. London: House of Commons, 2021.
29. Weeks G, George J, Maclure K, *et al*. Non-medical prescribing versus medical prescribing for acute and chronic disease management in primary and secondary care. *Cochrane Database Syst Rev* 2016;**11**:CD011227. doi:10.1002/14651858.CD011227.pub2.
30. Alghamdi SSA, Hodson K, Deslandes P, *et al*. Prescribing trends over time by non-medical independent prescribers in primary care settings across Wales (2011–2018): a secondary database analysis. *BMJ Open* 2020;**10**:e036379. doi:10.1136/bmjopen-2019-036379
31. National Prescribing Centre. Non-medical prescribing by nurses, optometrists, pharmacists, physiotherapists, podiatrists and radiographers. A quick guide for commissioners. Liverpool, 2010.
32. Prescription, supply and administration of medicines by allied health professionals - where are we now and where are we going? Regional AHP Non-Medical Prescriber Forum; 2019; Taunton.
33. Department of Health. Improving Patients' Access to Medicines: A Guide to Implementing Nurse and Pharmacist Independent Prescribing within the NHS in England. 2nd ed. Leeds Department of Health, 2006.
34. Graham-Clarke E, Rushton A, Noblet T, *et al*. Non-medical prescribing in the United Kingdom National Health Service: a systematic policy review. *PLoS One* 2019;**14**:e0214630. doi:10.1371/journal.pone.0214630
35. HM Government. The Medicines for Human Use (Prescribing) (Miscellaneous Amendments) Order, 2006.
36. The National Health Service. Miscellaneous Amendments Relating to Independent Prescribing Regulations. London, 2006.
37. General Pharmaceutical Council. Standards for the education and training of pharmacist independent prescribers. London: General Pharmaceutical Council, 2019.
38. Health and Care Professions Council. Standards for prescribing. London: Health and Care Professions Council, 2019.
39. Nursing and Midwifery Council. Standards for prescribing programmes 2019. Available: <https://www.nmc.org.uk/standards/standards-for-post-registration/standards-for-prescribers/standards-of-proficiency-for-nurse-and-midwife-prescribers/> [Accessed Jan 21].
40. Hales L, Lohan M, Jordan J. 'It's another way of standing outside the door' supplementary prescribing and doctor-nurse partnerships. *Soc Theory Health* 2010;**8**:210-228. doi:10.1057/sth.2010.1
41. Hill DR, Conroy S, Brown RC, *et al*. Stakeholder views on pharmacist prescribing in addiction services in NHS Lanarkshire. *J Subst Use* 2014;**19**:56-67. doi:10.3109/14659891.2012.734540

MainDocumentV2.0\_19112021

- 1
- 2
- 3
- 4 42. Carey N, Stenner K, Courtenay M. An exploration of how nurse prescribing is being used
- 5 for patients with respiratory conditions across the east of England. *BMC Health Serv*
- 6 *Res* 2014;**14**:27. doi:10.1186/1472-6963-14-27
- 7 43. Carey N, Stenner K, Edwards J, *et al.* Evaluation of Physiotherapist and Podiatrist
- 8 Independent Prescribing, Mixing of Medicines and Prescribing of Controlled Drugs.
- 9 Department of Health Policy Research PR-R7-0513-11002. Guildford, UK: University
- 10 of Surrey, 2017.
- 11 44. Courtenay M, Carey N, Stenner K. An overview of non medical prescribing across one
- 12 strategic health authority: a questionnaire survey. *BMC Health Serv Res*
- 13 2012;**12**:138-138. doi:10.1186/1472-6963-12-138
- 14 45. Bhanbhro S, Drennan VM, Grant R, *et al.* Assessing the contribution of prescribing in
- 15 primary care by nurses and professionals allied to medicine: a systematic review of
- 16 literature. *BMC Health Serv Res* 2011;**11**:330. doi:10.1186/1472-6963-11-330
- 17 46. Latter S, Blenkinsopp A, Smith A, *et al.* Evaluation of nurse and pharmacist independent
- 18 prescribing: University of Southampton, 2010.
- 19 47. Latter S, Smith A, Blenkinsopp A, *et al.* Are nurse and pharmacist independent
- 20 prescribers making clinically appropriate prescribing decisions? An analysis of
- 21 consultations. *J Health Serv Res Policy* 2012;**17**:149-156.
- 22 doi:10.1258/jhsrp.2012.011090
- 23 48. Carey N, Edwards J, Otter S, *et al.* A comparative case study of prescribing and non-
- 24 prescribing physiotherapists and podiatrists. *BMC Health Serv Res* 2020;**20**:1074.
- 25 doi:10.1186/s12913-020-05918-8
- 26 49. Ecker S, Joshi R, Shanthosh J, *et al.* Non-Medical prescribing policies: A global scoping
- 27 review. *Health Policy* 2020;**124**:721-726. doi:10.1016/j.healthpol.2020.04.015
- 28 50. Faruquee C, Guirguis L, Hughes C, *et al.* Characterizing pharmacist prescribers in
- 29 Alberta using cluster analysis. *J Pharm Health Serv Res* 2018;**10**:5-12.
- 30 doi:10.1111/jphs.12276
- 31 51. Fong J, Cashin A, Buckley T. Models of prescribing, scope of practice, and medicines
- 32 prescribed, a survey of nurse practitioners. *J Adv Nurs* 2020;**76**:2311-2322.
- 33 doi:10.1111/jan.14444
- 34 52. Groenewegen PP, Boerma, WGW, Spreeuwenberg P, *et al.* Task shifting from general
- 35 practitioners to practice assistants and nurses in primary care: a cross-sectional
- 36 survey in 34 countries. *Prim Health Care Res Dev* 2021;**22**:1-8.
- 37 doi:10.1017/S1463423621000657
- 38 53. Ladd E, Schober M. Nurse prescribing from the global vantage point: the intersection
- 39 between role and policy. *Policy Polit Nurs Pract* 2018;**19**:40-49.
- 40 54. Mills T, Patel N, Ryan K. Pharmacist non-medical prescribing in primary care. A
- 41 systematic review of views, opinions, and attitudes. *Int J Clin Pract* 2020:e13827.
- 42 doi:10.1111/ijcp.13827
- 43 55. Courtenay M, Khanfer R, Harries-Huntly G, *et al.* Overview of the uptake and
- 44 implementation of non-medical prescribing in Wales: a national survey. *BMJ Open*
- 45 2017;**7**:e015313. doi:10.1136/bmjopen-2016-015313
- 46 56. Dobel-Ober D, Brimblecombe N. National survey of nurse prescribing in mental health
- 47 services; a follow-up 6 years on. *J Psychiatr Ment Health Nurs* 2016;**23**:378-386.
- 48 doi:10.1111/jpm.12329
- 49 57. Wilson N, Pope C, Roberts L, *et al.* Limited pharmaceuticalisation: a qualitative case
- 50 study of physiotherapist prescribing practices in an NHS Trust in England following
- 51 the expansion of non-medical prescribing in the UK. *Sociol Health Illn* 2019;**42**:643-
- 52 659. doi:10.1111/1467-9566.13050
- 53 58. Weiss MC. The rise of non-medical prescribing and medical dominance. *Res Social Adm*
- 54 *Pharm* 2020;**17**:632-637. doi:10.1016/j.sapharm.2020.05.015
- 55 59. Coull A, Murray I, Turner-Halliday F, *et al.* The expansion of nurse prescribing in
- 56 Scotland: an evaluation. *Br J Community Nurs* 2013;**18**:234-242.
- 57 doi:10.12968/bjcn.2013.18.5.234.
- 58
- 59
- 60



MainDocumentV2.0\_19112021

- 1
- 2
- 3
- 4 60. Drennan J, Naughton C, Allen D, *et al*. Independent Evaluation of the Nurse and Midwife
- 5 Prescribing Initiative. Dublin: University College Dublin, 2009.
- 6 61. Casey M, Rhode D, Higgins A, *et al*. "Providing a complete episode of care": a survey of
- 7 registered nurse and registered midwife prescribing behaviours and practices.
- 8 *Journal of Clinical Nursing* 2020;**29**:152-162. doi:10.1111/jocn.15073
- 9 62. Fisher J, Kinnear M, Reid F, *et al*. What supports hospital pharmacist prescribing in
- 10 Scotland? - A mixed methods, exploratory sequential study. *Res Social Adm Pharm*
- 11 2018;**14**:488-497. doi:10.1016/j.sapharm.2017.06.007
- 12 63. Ross JD, Kettles AM. Mental health nurse independent prescribing: what are nurse
- 13 prescribers' views of the barriers to implementation? *J Psychiatr Ment Health Nurs*
- 14 2012;**19**:916-932. doi:10.1111/j.1365-2850.2011.01872.x
- 15 64. Stewart D, Maclure K, Newham R, *et al*. A cross-sectional survey of the pharmacy
- 16 workforce in general practice in Scotland. *Fam Pract* 2020;**37**:206-212. doi:
- 17 10.1093/fampra/cmz052
- 18 65. General Pharmaceutical Council. Prescribers survey report. London, 2016.
- 19 66. Stenner K, Carey N, Courtenay M. Implementing nurse prescribing: a case study in
- 20 diabetes. *J Adv Nurs* 2010;**66**:522-531. doi:10.1111/j.1365-2648.2009.05212.x
- 21 67. Stewart D, Jebara T, Cunningham S, *et al*. Future perspectives on nonmedical
- 22 prescribing. *Ther Adv Drug Saf* 2017;**8**:183-197. doi:10.1177/2042098617693546
- 23 68. Graham-Clarke E, Rushton A, Noblet T, *et al*. Facilitators and barriers to non-medical
- 24 prescribing - A systematic review and thematic synthesis. *PLoS One*
- 25 2018;**13**:e0196471-e0196471. doi:10.1371/journal.pone.0196471
- 26 69. Noblet T, Marriott J, Graham-Clarke E, *et al*. Barriers to and facilitators of independent
- 27 non-medical prescribing in clinical practice: a mixed-methods systematic review. *J*
- 28 *Physiother* 2017;**63**:221-234. doi:10.1016/j.jphys.2017.09.001
- 29 70. Jebara T, Cunningham S, MacLure K, *et al*. Stakeholders' views and experiences of
- 30 pharmacist prescribing: a systematic review. *Br J Clin Pharmacol* 2018;**84**:1883-
- 31 1905. doi:10.1111/bcp.13624
- 32 71. Nuttall D. Nurse prescribing in primary care: a metasynthesis of the literature. *Prim*
- 33 *Health Care Res Dev* 2018;**19**:7-22. doi:10.1017/S1463423617000500
- 34 72. Zhou M, Desborough J, Parkinson A, *et al*. Barriers to pharmacist prescribing; a scoping
- 35 review comparing UK, New Zealand, Canadian and Australian experiences. *Int J*
- 36 *Pharm Pract* 2019;**27**:479-489. doi:10.1111/ijpp.12557
- 37 73. Edwards J, Coward M, Carey N. Paramedic independent prescribing in primary care:
- 38 seven steps to success. *J Prescr Pract* 2020;**2**:292-299.
- 39 doi:10.12968/jppr.2020.2.6.292
- 40 74. Magowan J. Barriers and enablers to nurse prescribing in primary care. *J Prescr Pract*
- 41 2020;**2**:142-146. doi:10.12968/jppr.2020.2.3.142
- 42 75. Carey N, Stenner K, Courtenay M. Stakeholder views on the impact of nurse prescribing
- 43 on dermatology services. *J Clin Nurs* 2010;**19**:498-506. doi:10.1111/j.1365-
- 44 2702.2009.02874.x
- 45 76. Stewart F, Caldwell G, Cassells K, *et al*. Building capacity in primary care: the
- 46 implementation of a novel 'Pharmacy First' scheme for the management of UTI,
- 47 impetigo and COPD exacerbation. *Prim Health Care Res Dev* 2018;**19**:531-541.
- 48 doi:10.1017/s1463423617000925
- 49 77. Maskrey M, Johnson CF, Cormack J, *et al*. Releasing GP capacity with pharmacy
- 50 prescribing support and New Ways of Working: a prospective observational cohort
- 51 study. *Br J Gen Pract* 2018;**68**:e735-e742. doi:10.3399/bjgp18X699137
- 52 78. Mann C, Anderson C, Waring J, *et al*. "GP Pharmacy Transformation project" Community
- 53 Pharmacist Independent Prescribers (CPIPs) working in patient facing roles in
- 54 Primary Care. Independent Evaluation Report. Nottingham: University of Nottingham,
- 55 NHS England, 2017.
- 56 79. Northamptonshire GP Forward View Programme. Primary Care Workforce Strategy.
- 57 Northampton: Corby Clinical Commissioning Group and Nene Clinical
- 58 Commissioning Group, 2017.
- 59
- 60

- 1
  - 2
  - 3
  - 4
  - 5
  - 6
  - 7
  - 8
  - 9
  - 10
  - 11
  - 12
  - 13
  - 14
  - 15
  - 16
  - 17
  - 18
  - 19
  - 20
  - 21
  - 22
  - 23
  - 24
  - 25
  - 26
  - 27
  - 28
  - 29
  - 30
  - 31
  - 32
  - 33
  - 34
  - 35
  - 36
  - 37
  - 38
  - 39
  - 40
  - 41
  - 42
  - 43
  - 44
  - 45
  - 46
  - 47
  - 48
  - 49
  - 50
  - 51
  - 52
  - 53
  - 54
  - 55
  - 56
  - 57
  - 58
  - 59
  - 60
80. Greenhalgh T, Robert G, Macfarlane F, *et al.* Diffusion of innovations in service organizations: systematic review and recommendations. *Milbank Q* 2004;**82**:581–629. doi:10.1111/j.0887-378X.2004.00325.x
81. Rogers E. Diffusion of Innovations. 5th ed. New York, USA: The Free Press 2003.
82. Damschroder L, Keith RE, Aaron DC, *et al.* Fostering implementation of health services research findings into practice: A consolidated framework for advancing implementation science. *Implement Sci* 2009;**7**:50. doi:10.1186/1748-5908-4-50
83. Lambert-Kerzner AC, Aasen DM, Overbey DM, *et al.* Use of the consolidated framework for implementation research to guide dissemination and implementation of new technologies in surgery. *J Thorac Dis* 2019;**11**:S487–S499. doi:10.21037/jtd.2019.01.29.
84. Chor KH, Wisdom JP, Olin SC, *et al.* Measures for predictors of innovation adoption. *Adm Policy Ment Health* 2015;**42**:545-573. doi: 10.1007/s10488-014-0551-7.
85. Dearing J, Cox J. Diffusion Of Innovations Theory, Principles, And Practice. *Health Aff (Millwood)* 2018;**37**:183-190. doi:10.1377/hlthaff.2017.1104
86. Dearing JW, Singhal A. New directions for diffusion of innovations research: Dissemination, implementation, and positive deviance. *Hum Behav Emerg Technol* 2020;**2**:307-313. doi:10.1002/hbe2.216
87. Breimaier HB, Heckemann B, Halfens RJG, *et al.* The Consolidated Framework for Implementation Research (CFIR): a useful theoretical framework for guiding and evaluating a guideline implementation process in a hospital-based nursing practice. *BMC Nurs* 2015;**14**:43. doi:10.1186/s12912-015-0088-4
88. CFIR. Consolidated Framework for Implementation Research. Ann Arbor: USA: CFIR Research Team-Center for Clinical Management Research; 2021. Available: <https://cfirguide.org/tools/> [Accessed Jan 2021].
89. Damschroder LJ, Reardon CM, Sperber N, *et al.* Implementation evaluation of the Telephone Lifestyle Coaching (TLC) program: organizational factors associated with successful implementation. *Transl Behav Med* 2017;**7**:233-241. doi:10.1007/s13142-016-0424-6
90. Tong A, Flemming K, McInnes E, *et al.* Enhancing transparency in reporting the synthesis of qualitative research: ENTREQ. *BMC Med Res Methodol* 2012;**12**:181. doi:10.1186/1471-2288-12-181
91. Page MJ, McKenzie JE, Bossuyt PM, *et al.* The PRISMA 2020 statement: an updated guideline for reporting systematic reviews. *BMJ* 2021;**372**:n71. doi:10.1136/bmj.n71
92. Aguirre R, Bolton K. Qualitative interpretive meta-synthesis in social work research: Uncharted territory. *J Soc Work* 2014;**14**:279-294. doi:10.1177/1468017313476797
93. Nye E, Melendez-Torres GJ, Bonell C. Origins, methods and advances in qualitative meta-synthesis. *Rev Educ* 2016;**4**:57-79. doi:10.1002/rev3.3065
94. Booth A, Noyes J, Flemming K, *et al.* Guidance on choosing qualitative evidence synthesis methods for use in health technology assessments of complex interventions. 2016. Available: <http://www.integrate-hta.eu/downloads/> [Accessed Dec 2020].
95. National Cancer Institute. Qualitative Research in Implementation Science (QualRIS). USA: U.S. Department of Health and Human Sciences, National Institutes of Health, 2019.
96. Michie S, Fixsen D, Grimshaw JM, *et al.* Specifying and reporting complex behaviour change interventions: the need for a scientific method. *Implement Sci* 2009;**4**:40. doi:10.1186/1748-5908-4-40
97. Edwards J, Coward M, Carey N. Barriers and facilitators to implementation of non-medical independent prescribing in primary care: a qualitative systematic review (CRD42019124400) York: PROSPERO; 2019.
98. Bosch M, Van Der Weijden T, Wensing M, *et al.* Tailoring quality improvement interventions to identified barriers; a multiple case analysis. *J Eval Clin Pract* 2007;**13**:161-168. doi:10.1111/j.1365-2753.2006.00660.x.

MainDocumentV2.0\_19112021

- 1
  - 2
  - 3
  - 4
  - 5
  - 6
  - 7
  - 8
  - 9
  - 10
  - 11
  - 12
  - 13
  - 14
  - 15
  - 16
  - 17
  - 18
  - 19
  - 20
  - 21
  - 22
  - 23
  - 24
  - 25
  - 26
  - 27
  - 28
  - 29
  - 30
  - 31
  - 32
  - 33
  - 34
  - 35
  - 36
  - 37
  - 38
  - 39
  - 40
  - 41
  - 42
  - 43
  - 44
  - 45
  - 46
  - 47
  - 48
  - 49
  - 50
  - 51
  - 52
  - 53
  - 54
  - 55
  - 56
  - 57
  - 58
  - 59
  - 60
99. Grol R, Wensing M. What Drives Change? Barriers to and Incentives for Achieving Evidence-Based Practice. *Medical J Aust* 2004;**180**:S57-60. doi:10.5694/j.1326-5377.2004.tb05948.x
100. Nilsson-Kajermo K, Bostrom A-M, Thompson DS, *et al.* The BARRIERS scale - the barriers to research utilization scale: a systematic review. *Implement Sci* 2010;**5**:32. doi:10.1186/1748-5908-5-32
101. Shaw B, Cheater F, Baker R, *et al.* Tailored interventions to overcome identified barriers to change: effects on professional practice and health care outcomes. *Cochrane Database Syst Rev* 2005:CD005470. doi:10.1002/14651858.CD005470.pub2
102. World Health Organization. How do we ensure that innovation in health service delivery and organization is implemented, sustained and spread? Copenhagen, Denmark: European Observatory on Health Systems and Policies, 2018.
103. Cooke A, Smith D, Booth A. Beyond PICO: the SPIDER tool for qualitative evidence synthesis. *Qual Health Res* 2012;**22**:1435-1443. doi:10.1177/1049732312452938
104. Rogers M, Bethel A, Abbott R. Locating qualitative studies in dementia on MEDLINE, EMBASE, CINAHL, and PsycINFO: A comparison of search strategies. *Res Synth Methods* 2018;**9**:579-586. doi:10.1002/jrsm.1280
105. Rosumeck S, Wagner M, Wallraf S, *et al.* A validation study revealed differences in design and performance of search filters for qualitative research in PsycINFO and CINAHL. *J Clin Epidemiol* 2020;**128**:101-108. doi:10.1016/j.jclinepi.2020.09.031
106. Department of Health. Equity and excellence: Liberating the NHS. London, UK, 2010.
107. HM Government. The Health and Social Care Act 2012. London: The Stationery Office, 2012.
108. NHS England. Five Year Forward View. London, UK: NHS England, 2014.
109. Vizard P, Obolenskaya P. The Coalition's Record on Health: Policy, Spending and Outcomes 2010-2015. Social Policy in a Cold Climate: Working Paper. London, UK: The London School of Economics and Political Science, 2015.
110. Gadsby EW, Peckham S, Coleman A, *et al.* Commissioning for health improvement following the 2012 health and social care reforms in England: what has changed? *BMC Public Health* 2017;**17**:211. doi:10.1186/s12889-017-4122-1
111. Miller T, Bonas S, Dixon Woods M. Qualitative research on breastfeeding in the UK: a narrative review and methodological reflection. *Evid Policy* 2007;**3**:197-230. doi: 10.1332/174426407781172162
112. Noyes J, Popay J. Directly observed therapy and tuberculosis: how can a systematic review of qualitative research contribute to improving services? A qualitative meta-synthesis. *J Adv Nurs* 2007;**57**:227-243. doi:10.1111/j.1365-2648.2006.04092.x
113. Carroll C, Booth A, Lloyd-Jones M. Should we exclude inadequately reported studies from qualitative systematic reviews? An evaluation of sensitivity analyses in two case study reviews. *Qual Health Res* 2012;**22**:1425-1434. doi:10.1177/1049732312452937
114. Sirriyeh R, Lawton R, Gardner P, *et al.* Reviewing studies with diverse designs: the development and evaluation of a new tool. *J Eval Clin Pract* 2012;**18**:746-752. doi:10.1111/j.1365-2753.2011.01662.x
115. Fenton L, Lauckner H, Gilbert R. The QATSDD critical appraisal tool: comments and critiques. *J Eval Clin Pract* 2015;**21**:1125-1128. doi: 10.1111/jep.12487
116. National Institute of Care and Health Excellence. Developing NICE guidelines: the manual. London. 2020 Available: <https://www.nice.org.uk/process/pmg20/chapter/reviewing-research-evidence> [Accessed Dec 2020].
117. Noyes J, Booth A, Lewin S, *et al.* Applying GRADE-CERQual to qualitative evidence synthesis findings-paper 6: how to assess relevance of the data. *Implement Sci* 2018;**13**:4. doi:10.1186/s13012-017-0693-6

MainDocumentV2.0\_19112021

118. Fixsen DL, Blase KA, Van Dyke MK. Science and implementation. Chapel Hill, NC: Active Implementation Research Network 2019. Available: <https://www.activeimplementation.org/resources> [Accessed Jan 2021].
119. Nilsen P. Making sense of implementation theories, models and frameworks. *Implement Sci* 2015;**10**:53. doi:10.1186/s13012-015-0242-0
120. Saldana L. The stages of implementation completion for evidence-based practice: protocol for a mixed methods study. *Implement Sci* 2014;**9**:43. doi:10.1186/1748-5908-9-43
121. Thomas J, Harden A. Methods for the thematic synthesis of qualitative research in systematic reviews. *BMC Med Res Methodol* 2008;**8**:45. doi:10.1186/1471-2288-8-45
122. Sandelowski M. Whatever happened to qualitative description? *Res Nurs Health* 2000;**23**:334-340. doi:10.1002/1098-240x(200008)23:4<334::aid-nur9>3.0.co;2-g.
123. Checkland K, Harrison S, Marshall M. Is the metaphor of 'barriers to change' useful in understanding implementation? Evidence from general medical practice. *J Health Serv Res Policy* 2007;**12**:95-100. doi:10.1258/135581907780279657.
124. Hossain LN, Fernandez-Llimos F, Luckett T, et al. Qualitative meta-synthesis of barriers and facilitators that influence the implementation of community pharmacy services: perspectives of patients, nurses and general medical practitioners. *BMJ Open* 2017;**7**(9):e015471. doi:10.1136/bmjopen-2016-015471
125. NVivo qualitative data analysis software, Version 12, 2018.
126. Evans C, Tweheyo R, McGarry J, et al. Seeking culturally safe care: a qualitative systematic review of the healthcare experiences of women and girls who have undergone female genital mutilation/cutting. *BMJ Open* 2019;**9**:e027452-e027452. doi:10.1136/bmjopen-2018-027452
127. Booth A, Carroll C, Iloft I, et al. Desperately seeking dissonance: identifying the disconfirming case in qualitative evidence synthesis. *Qual Health Res* 2013;**23**:126-141. doi:10.1177/1049732312466295
128. Bazeley P. Analysing qualitative data: More than 'identifying themes'. *Malays J Qual Res* 2009;**2**:6-22.
129. Afseth JD, Paterson RE. The views of non-medical prescribing students and medical mentors on interprofessional competency assessment – A qualitative exploration. *Nurse Educ Today* 2017;**52**:103-108. doi:10.1016/j.nedt.2017.02.022
130. Boreham N, Coull AF, Murray ID, et al. Education programmes preparing independent prescribers in Scotland: an evaluation. *Nurse Educ Today* 2013;**33**:321-326. doi:10.1016/j.nedt.2013.01.018
131. Bowskill D, Meade O, Lymn JS. Use and evaluation of a mentoring scheme to promote integration of non-medical prescribing in a clinical context. *BMC Med Educ* 2014;**14**:177. doi:10.1186/1472-6920-14-177
132. Brodie L, Donaldson J, Watt S. Non-medical prescribers and benzodiazepines: A qualitative study. *Nurse Prescribing* 2014;**12**(7):353-359. doi:10.12968/npre.2014.12.7.353
133. Carter M, Chapman S, Watson MC. Multiplicity and complexity: a qualitative exploration of influences on prescribing in UK general practice. *BMJ open* 2021;**11**(1):e041460. doi:10.1136/bmjopen-2020-041460
134. Cole T, Gillett K. Are nurse prescribers issuing prescriptions in palliative care? *Nurse Prescribing* 2015;**13**:98-102. doi:10.12968/npre.2015.13.2.98
135. Courtenay M, Stenner K, Carey N. The views of patients with diabetes about nurse prescribing. *Diabet Med* 2010;**27**:1049-1054. doi:10.1111/j.1464-5491.2010.03051.x
136. Courtenay M, Rowbotham S, Lim R, et al. Antibiotics for acute respiratory tract infections: a mixed-methods study of patient experiences of non-medical prescriber management. *BMJ Open* 2017;**7**:e013515-e013515. doi:10.1136/bmjopen-2016-013515
137. Courtenay M, Rowbotham S, Lim R, et al. Examining influences on antibiotic prescribing by nurse and pharmacist prescribers: a qualitative study using the

MainDocumentV2.0\_19112021

- 1  
2  
3 Theoretical Domains Framework and COM-B. *BMJ Open* 2019;**9**:e029177. doi:  
4 10.1136/bmjopen-2019-029177
- 5 138. Cousins R, Donnell C. Nurse prescribing in general practice: a qualitative study of job  
6 satisfaction and work-related stress. *Family Pract* 2012;**29**:223-227.  
7 doi:10.1093/fampra/cmr077
- 8 139. Daughtry J, Hayter M. A qualitative study of practice nurses' prescribing experiences.  
9 *Practice Nursing* 2010;**21**:310-314. doi:10.12968/pnur.2010.21.6.48329
- 10 140. Dhalivaal J. Patients' perspectives on prescribing by nurses in general practice.  
11 *Practice Nursing* 2011;**22**:41-46. doi:10.12968/pnur.2011.22.1.41
- 12 141. Downer F, Shepherd CK. District nurses prescribing as nurse independent prescribers.  
13 *Br J Community Nurs* 2010;**15**:348-352. doi:10.12968/bjcn.2010.15.7.48774
- 14 142. Herklots A, Baileff A, Latter S. Community matrons' experience as independent  
15 prescribers. *Br J Community Nurs* 2015;**20**:217. doi:10.12968/bjcn.2015.20.5.217
- 16 143. Holden MA, Whittle R, Waterfield J, *et al*. A mixed methods exploration of  
17 physiotherapist's approaches to analgesic use among patients with hip osteoarthritis.  
18 *Physiotherapy* 2019;**105**:328-337. doi:10.1016/j.physio.2018.08.003
- 19 144. Inch J, Notman F, Bond CM, *et al*. The Care Home Independent Prescribing  
20 Pharmacist Study (CHIPPS) - a non-randomised feasibility study of independent  
21 pharmacist prescribing in care homes. *Pilot Feasibility Stud* 2019;**5**:89.  
22 doi:10.1186/s40814-019-0465-y
- 23 145. Kelly A, Neale J, Rollings R. Barriers to extended nurse prescribing among practice  
24 nurses. *Community Practice* 2010;**83**:21-24.
- 25 146. Lane K, Bond C, Wright D, *et al*. "Everyone needs to understand each other's systems":  
26 Stakeholder views on the acceptability and viability of a Pharmacist Independent  
27 Prescriber role in care homes for older people in the UK. *Health Soc Care*  
28 *Community* 2020;**28**:1479-1487. doi:https://doi.org/10.1111/hsc.12970
- 29 147. Latham K, Nyatanga B. Community palliative care clinical nurse specialists as  
30 independent prescribers: part 1. *Br J Community Nurs* 2018;**23**:94-98. doi:  
31 10.12968/bjcn.2018.23.2.94
- 32 148. Latham K, Nyatanga B. Community palliative care clinical nurse specialists as  
33 independent prescribers: part 2. *Br J Community Nurs* 2018;**23**:126-133.  
34 doi:10.12968/bjcn.2018.23.3.126
- 35 149. Maddox C, Halsall D, Hall J, *et al*. Factors influencing nurse and pharmacist willingness  
36 to take or not take responsibility for non-medical prescribing. *Res Social Adm Pharm*  
37 2016;**12**:41-55. doi:10.1016/j.sapharm.2015.04.001
- 38 150. Stenner KL, Courtenay M, Carey N. Consultations between nurse prescribers and  
39 patients with diabetes in primary care: A qualitative study of patient views. *Int J Nurs*  
40 *Stud* 2011;**48**:37-46. doi:10.1016/j.ijnurstu.2010.06.006
- 41 151. Weiss MC, Platt J, Riley R, *et al*. GPs, nurses and pharmacists as prescribers in  
42 primary care: an exploration using the social identity approach / Hausärzte/-innen,  
43 Diplomierte Pflegefachpersonen und Apotheker/-innen als Arzneimittelverschreiber/-  
44 innen: eine Exploration mit dem Ansatz der Sozialen Identität. *Int J Health Prof*  
45 2016;**3**:153-164. doi:doi.org/10.1515/ijhp-2016-0023
- 46 152. Williams SJ, Halls AV, Tonkin-Crine S, *et al*. General practitioner and nurse prescriber  
47 experiences of prescribing antibiotics for respiratory tract infections in UK primary  
48 care out-of-hours services (the UNITE study). *J Antimicrob Chemother* 2018;**73**:795-  
49 803. doi:10.1093/jac/dkx429
- 50 153. Health Education England. The future of primary care. Creating teams for tomorrow.  
51 London, UK: Primary Care Workforce Commission, 2015.
- 52 154. Health Education England. Elective Care High Impact Interventions: First Contact  
53 Practitioner for MSK Services. London: Health Education England, NHS Improvement,  
54 2019.
- 55 155. NHS England. Building the workforce — the new deal for general practice. London:  
56 NHS England, Health Education England, 2015.
- 57 156. NHS England. General Practice Forward View. London, UK: NHS England, 2016.
- 58  
59  
60

MainDocumentV2.0\_19112021

157. Beech J, Bottery S, Charlesworth A, *et al*. Closing the gap. Key areas for action on the health and care workforce. London, UK: The Nuffield Trust, 2019.
158. Roland M. The future of primary care. Creating teams for tomorrow. Report by the Primary Care Workforce Commission. London: UK: Health Education England, 2015.
159. Jarman S, Carey N. Exploring the roles and responsibilities of non-medical prescribing leads in the South West of England. *J Prescr Pract* 2020;**2**:546-554. doi:10.12968/jprp.2020.2.10.546
160. Lim R, Courtenay M, Deslandes R, *et al*. Theory-based electronic learning intervention to support appropriate antibiotic prescribing by nurse and pharmacist independent prescribers: an acceptability and feasibility experimental study using mixed methods. *BMJ Open* 2020;**10**:e036181. doi:10.1136/bmjopen-2019-036181
161. Reeve J, Britten N, Byng R, *et al*. Identifying enablers and barriers to individually tailored prescribing: a survey of healthcare professionals in the UK. *BMC Fam Pract* 2018;**19**:17. doi:10.1186/s12875-017-0705-2
162. Lau R, Stevenson F, Ong BN, *et al*. Achieving change in primary care—effectiveness of strategies for improving implementation of complex interventions: systematic review of reviews. *BMJ Open* 2015;**5**:e009993. doi:10.1136/bmjopen-2015-009993
163. The King's Fund. The NHS under the coalition government. Part one: NHS reform. London: The King's Fund, 2015.
164. Hacking S, Taylor J. An evaluation of the scope and practice of Non Medical Prescribing in the North West For NHS North West. Manchester, UK: NHS North West, 2010.
165. i5 Health. Non-Medical Prescribing; An Economic Evaluation: NHS Health Education North West, 2015.
166. Pettigrew LM, Kumpunen S, Mays N, *et al*. The impact of new forms of large-scale general practice provider collaborations on England's NHS: a systematic review. *Br J Gen Pract* 2018;**68**:e168. doi:10.3399/bjgp18X694997
167. Sheaff RJ. Plural provision of primary medical care in England, 2002–2012. *Health Serv Res Policy* 2013;**18**:20-28. doi:10.1177/1355819613489544
168. Smith J, Holder H, Edwards N, *et al*. Securing the future of general practice: new models of primary care. London: Kings' Fund, Nuffield Trust, 2013.
169. NHS Digital. General Practice Workforce: interactive dashboard. London: NHS Digital, 2021.
170. Tonna A, McCaig D, Diack L, *et al*. Development of consensus guidance to facilitate service redesign around pharmacist prescribing in UK hospital practice. *Int J Clin Pharm* 2014;**36**:1069-1076. doi:10.1007/s11096-014-9996-8
171. Abuzour AS, Lewis PJ, Tully MP. Practice makes perfect: A systematic review of the expertise development of pharmacist and nurse independent prescribers in the United Kingdom. *Res Social Adm Pharm* 2018;**14**:6-17. doi:10.1016/j.sapharm.2017.02.002
172. Bowskill D, Timmons S, James V. How do nurse prescribers integrate prescribing in practice: case studies in primary and secondary care. *J Clin Nurs* 2013;**22**:2077-2086. doi: 10.1111/j.1365-2702.2012.04338.x.
173. Courtenay M, Carey N, Stenner K. Non medical prescribing leads views on their role and the implementation of non medical prescribing from a multi-organisational perspective. *BMC Health Serv Res* 2011;**11**:142. doi:10.1186/1472-6963-11-142
174. Lim RHM, Courtenay M, Fleming G. Roles of the non-medical prescribing leads within organisations across a Strategic Health Authority: perceived functions and factors supporting the role. *Int J Pharm Pract* 2013;**21**:82-91. doi:10.1111/j.20427174.2012.00224.x
175. Ziegler L, Bennett M, Blenkinsopp A, *et al*. Non-medical prescribing in palliative care: a regional survey. *Palliat Med* 2015;**29**:177-181. doi:10.1177/0269216314557346
176. Spillane D, Courtenay M, Chater A, *et al*. Factors influencing the prescribing behaviour of independent prescriber optometrists: a qualitative study using the Theoretical

MainDocumentV2.0\_19112021

- 1  
2  
3 Domains Framework. *Ophthalmic Physiol Opt* 2021;**41**:301-315.  
4 doi:10.1111/opo.12782
- 5 177. Stenner K, van Even S, Collen A. Early adopters of paramedic prescribing: a qualitative  
6 study. *Br Paramed J* 2019;**4**:57. doi: 10.29045/14784726.2019.12.4.3.57.
- 7 178. College of Paramedics. Improving Patients' Access to Medicines: A Guide to  
8 Implementing Paramedic Prescribing within the NHS in the UK. Bridgewater, UK:  
9 College of Paramedics, 2018.
- 10 179. Eaton G, Wong G, Williams V, *et al*. Contribution of paramedics in primary and urgent  
11 care: a systematic review. *Br J Gen Pract* 2020;**70**:e421.  
12 doi:10.3399/bjgp20X709877
- 13 180. Wagstaff B, Mistry V. The integration of paramedics into primary care. *Br J Gen Pract*  
14 2020;**70**(692):123. doi: 10.3399/bjgp20X708545.
- 15 181. Dixon M. The developing role of the paramedic prescriber. *J Prescr Pract* 2020;**2**:98-  
16 100. doi:10.12968/jprp.2020.2.2.98
- 17 182. Regmi K, Mudyarabikwa O. A systematic review of the factors - barriers and enablers -  
18 affecting the implementation of clinical commissioning policy to reduce health  
19 inequalities in the National Health Service (NHS), UK. *Public Health* 2020;**186**:271-  
20 282. doi:1016/j.puhe.2020.07.027
- 21 183. Marshall M, Holti R, Hartley J, *et al*. GP leadership in clinical commissioning groups: a  
22 qualitative multi-case study approach across England. *Br J Gen Pract* 2018;**68**:e427.  
23 doi:10.3399/bjgp18X696197
- 24 184. Peckham P, Falconer J, Gillam S, *et al*. The organisation and delivery of health  
25 improvement in general practice and primary care: a scoping study. Health Services  
26 and Delivery Research Southampton (UK): NIHR Journals Library: PMID: 26131542,  
27 2015.
- 28 185. Smith JA, Parkinson S, Harshfield A, *et al*. Early evidence of the development of  
29 primary care networks in England: a rapid evaluation study. Southampton: NIHR  
30 Health Services and Delivery Research Topic Report, 2020.
- 31 186. Bunce AE, Groß I, Davis JV, *et al*. Lessons learned about the effective  
32 operationalization of champions as an implementation strategy: results from a  
33 qualitative process evaluation of a pragmatic trial. *Implement Sci* 2020;**15**:87.  
34 doi:10.1186/s13012-020-01048-1
- 35 187. Miech EJ, Rattray NA, Flanagan ME, *et al*. Inside help: an integrative review of  
36 champions in healthcare-related implementation. *SAGE Open Med* 2018;**6**:1-11. doi:  
37 10.1177/2050312118773261
- 38 188. Powell BJ, Thomas JW, Chinman MJ, *et al*. A refined compilation of implementation  
39 strategies: results from the expert recommendations for implementing change (ERIC)  
40 project. *Implement Sci* 2015;**10**:21. doi:10.1186/s13012-015-0209-1
- 41 189. Bryce C, Russell R, Dale J. Learning from the transfer of a fellowship programme to  
42 support primary care workforce needs in the UK: a qualitative study. *BMJ Open*  
43 2019;**9**:e023384. doi:10.1136/bmjopen-2018-023384
- 44 190. O'Cathain A, Croot L, Duncan E, *et al*. Guidance on how to develop complex  
45 interventions to improve health and healthcare. *BMJ Open* 2019;**9**:e029954.  
46 doi:10.1136/bmjopen-2019-029954  
47  
48  
49  
50  
51  
52  
53  
54  
55  
56  
57  
58  
59  
60

1  
2  
3  
4  
5  
6  
7  
8  
9  
10  
11  
12  
13  
14  
15  
16  
17  
18  
19  
20  
21  
22  
23  
24  
25  
26  
27  
28  
29  
30  
31  
32  
33  
34  
35  
36  
37  
38  
39  
40  
41  
42  
43  
44  
45  
46  
47  
48  
49  
50  
51  
52  
53  
54  
55  
56  
57  
58  
59  
60

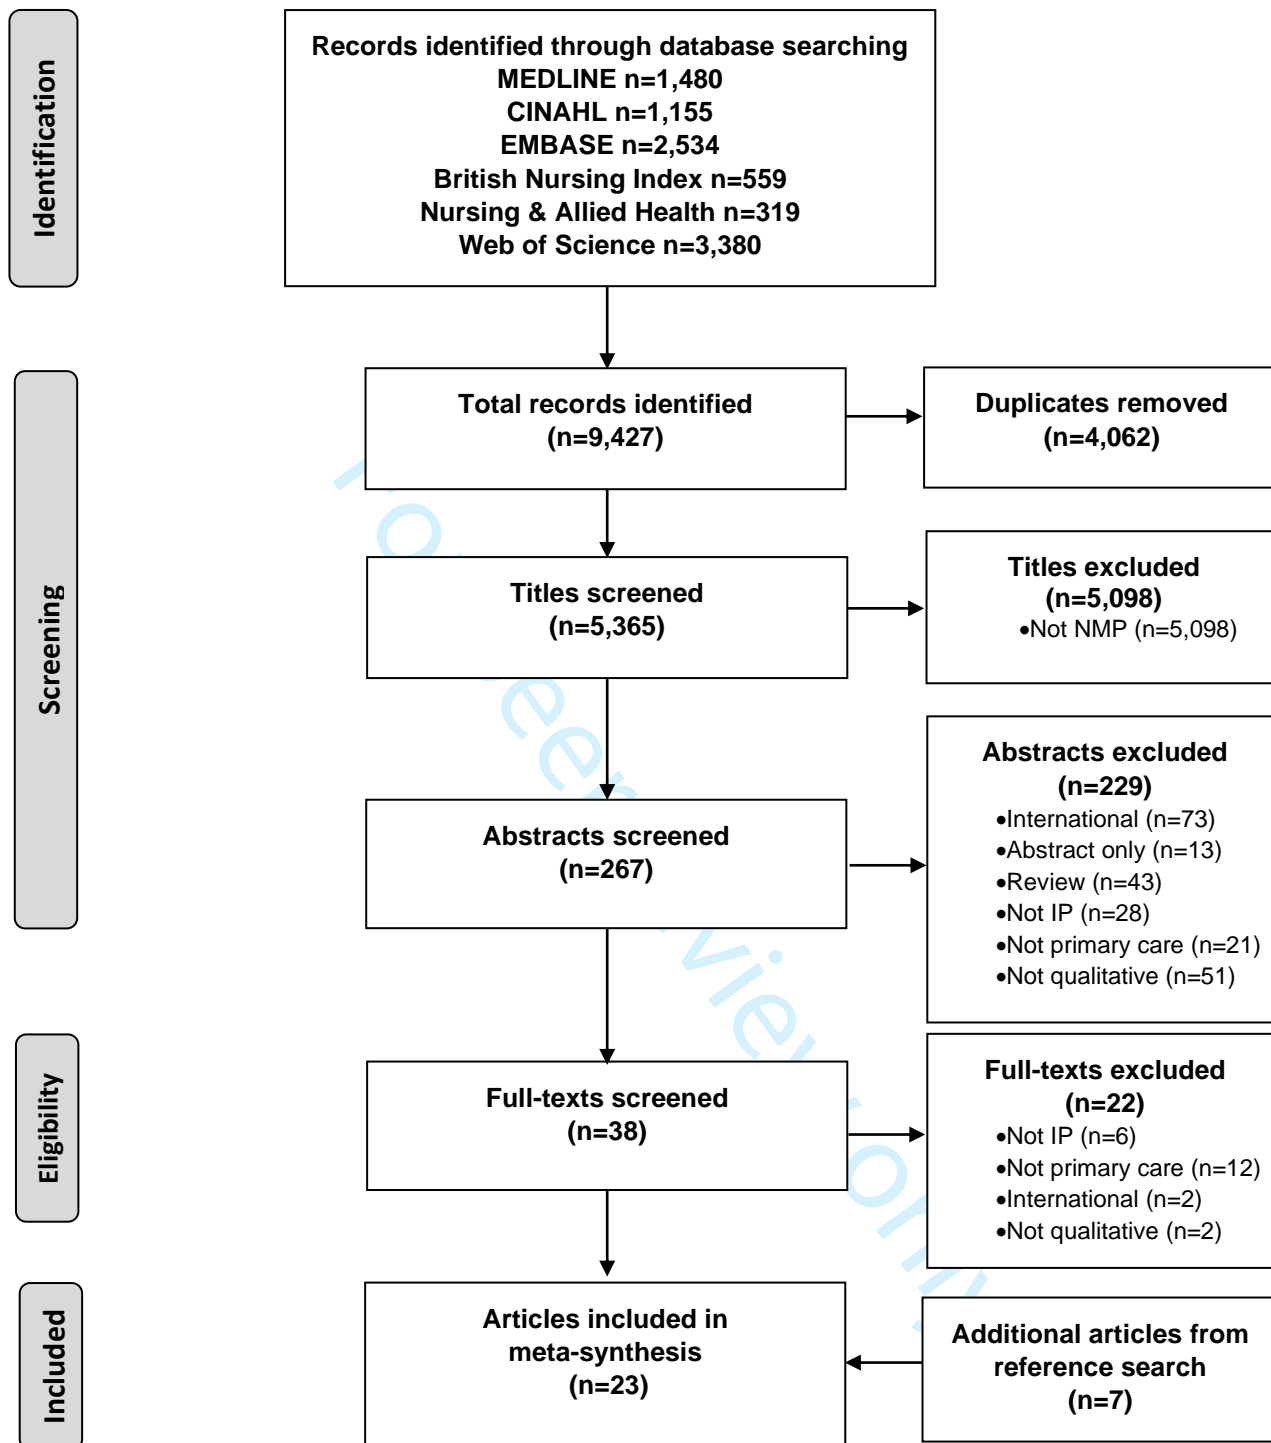



SupplementaryFile1\_V2.0\_19112021

## Supplementary File 1. MEDLINE search string

| EBSCO host; MEDLINE |                                                                                |         |
|---------------------|--------------------------------------------------------------------------------|---------|
| 1                   | (MM "Family Practice")                                                         | 42,149  |
| 2                   | (MM "Primary Health Care")                                                     | 52,315  |
| 3                   | (MM "Physicians, Family")                                                      | 11,183  |
| 4                   | (MH "Community Health Nursing")                                                | 19,640  |
| 5                   | (MH "Community Health Workers")                                                | 5,502   |
| 6                   | (MH "Community Health Services")                                               | 32,035  |
| 7                   | (MH "Community Health Centres")                                                | 34,071  |
| 8                   | TI (community N1 health) OR AB (community N1 health)                           | 41,477  |
| 9                   | TI (community N1 care) OR AB (community N1 care)                               | 13,601  |
| 10                  | TI (primary N1 health) OR AB (primary N1 health)                               | 28,349  |
| 11                  | TI (primary N1 care) OR AB (primary N1 care)                                   | 138,944 |
| 12                  | TI (general N1 practice*) OR AB (general N1 practice*)                         | 45,549  |
| 13                  | TI (general N1 practitioner*) OR AB (general N1 practitioner*)                 | 53,594  |
| 14                  | TI (family N1 practice*) OR AB (family N1 practice*)                           | 10,921  |
| 15                  | TI (family N1 practitioner*) OR AB (family N1 practitioner*)                   | 2,955   |
| 16                  | TI (gp N1 practice*) OR AB (gp N1 practice*)                                   | 2,067   |
| 17                  | TI (gp N1 service*) OR AB (gp N1 service*)                                     | 433     |
| 18                  | TI (gp N1 clinic*) OR AB (gp N1 clinic*)                                       | 341     |
| 19                  | OR/1-18                                                                        | 343,938 |
| 20                  | TI prescrib* OR AB prescrib*                                                   | 153,174 |
| 21                  | TI independent prescrib* OR AB independent prescrib*                           | 508     |
| 22                  | TI non-medical prescrib* OR AB non-medical prescrib*                           | 208     |
| 23                  | OR/20-22                                                                       | 153,174 |
| 24                  | TI nurs* OR AB nurs*                                                           | 460,786 |
| 25                  | TI physiotherap* OR AB physiotherap*                                           | 26,543  |
| 26                  | TI pharmacist* OR AB pharmacist*                                               | 34,354  |
| 27                  | TI (podiatr* OR chiropod*) OR AB (podiatr* OR chiropod*)                       | 3,274   |
| 28                  | TI radiographer* OR AB radiographer*                                           | 1,746   |
| 29                  | TI (dietician* OR dietician*) OR AB (dietician* OR dietician*)                 | 7,306   |
| 30                  | TI paramedic* OR AB paramedic*                                                 | 7,958   |
| 31                  | TI optometr* OR AB optometr*                                                   | 3,584   |
| 32                  | OR/24-31                                                                       | 533,864 |
| 33                  | 23 AND 32                                                                      | 12,932  |
| 34                  | TI nurs* N1 prescrib* OR AB nurs* N1 prescrib*                                 | 1,054   |
| 35                  | TI pharmacist* N1 prescrib* OR AB pharmacist* N1 prescrib*                     | 751     |
| 36                  | TI physiotherap* N1 prescrib* OR AB physiotherap* N1 prescrib*                 | 105     |
| 37                  | TI paramedic* N1 prescrib* OR AB paramedic* N1 prescrib*                       | 4       |
| 38                  | TI podiatr* N1 prescrib* OR AB podiatr* N1 prescrib*                           | 15      |
| 39                  | TI chiropod* N1 prescrib* OR AB chiropod* N1 prescrib*                         | 2       |
| 40                  | TI dietician* N1 prescrib* OR AB dietician* N1 prescrib*                       | 18      |
| 41                  | TI dietitian* N1 prescrib* OR AB dietitian* N1 prescrib*                       | 3       |
| 42                  | TI radiograph* N1 prescrib* OR AB radiograph* N1 prescrib*                     | 61      |
| 43                  | TI optometr* N1 prescrib* OR AB optometr*N1 prescrib*                          | 14      |
| 44                  | OR/34-43                                                                       | 1,985   |
| 45                  | 33 OR 44                                                                       | 12,993  |
| 46                  | 19 AND 45                                                                      | 2,417   |
| 47                  | LIMITS Full Text, Published 20100101-20201231, Peer-reviewed, English language | 1,480   |

SupplementaryFile2\_V2.0\_19112021

## Supplementary File 2. Quality Assessment Tool for Studies with Diverse Designs scores

|                                                                                        | Afseth & Paterson 2017 | Boreham 2013 | Bowskill 2014 | Brodie 2014 | Carter 2021 | Cole & Gillett 2015 | Courtenay 2010 | Courtenay 2017 | Courtenay 2019 | Cousins & Donnell 2012 | Daughtry & Hayter 2010 | Dhalivaal 2011 | Downer & Shepherd 2010 | Herklots 2015 | Holden 2018 | Inch 2019 | Kelly 2010 | Lane 2020 | Latham & Nyatanga 2018a,b | Maddox 2016 | Stenner 2011 | Weiss 2016 | Williams 2018 |
|----------------------------------------------------------------------------------------|------------------------|--------------|---------------|-------------|-------------|---------------------|----------------|----------------|----------------|------------------------|------------------------|----------------|------------------------|---------------|-------------|-----------|------------|-----------|---------------------------|-------------|--------------|------------|---------------|
| Explicit theoretical framework                                                         | 3                      | 1            | 0             | 0           | 3           | 0                   | 1              | 0              | 3              | 1                      | 0                      | 0              | 3                      | 0             | 3           | 0         | 0          | 3         | 3                         | 0           | 0            | 0          | 3             |
| Statement of aims/ objectives in main body of report                                   | 3                      | 3            | 3             | 2           | 3           | 3                   | 2              | 3              | 3              | 2                      | 3                      | 2              | 3                      | 3             | 3           | 3         | 3          | 2         | 3                         | 2           | 3            | 3          | 3             |
| Clear description of research setting                                                  | 3                      | 3            | 3             | 2           | 3           | 2                   | 3              | 2              | 3              | 3                      | 3                      | 2              | 1                      | 2             | 2           | 3         | 2          | 3         | 3                         | 2           | 3            | 3          | 2             |
| Evidence of sample size considered in terms of analysis                                | 0                      | 0            | 0             | 0           | 1           | 0                   | 0              | 0              | 2              | 3                      | 0                      | 3              | 0                      | 1             | 3           | 3         | 1          | 1         | 2                         | 3           | 0            | 0          | 0             |
| Representative sample of target group of a reasonable size                             | 2                      | 3            | 3             | 2           | 2           | 3                   | 3              | 3              | 2              | 3                      | 1                      | 2              | 0                      | 1             | 3           | 3         | 3          | 3         | 1                         | 3           | 3            | 3          | 3             |
| Description of procedure for data collection                                           | 3                      | 3            | 3             | 2           | 3           | 1                   | 2              | 2              | 3              | 3                      | 2                      | 2              | 2                      | 2             | 3           | 1         | 1          | 3         | 3                         | 3           | 3            | 3          | 2             |
| Rationale for choice of data collection tool(s)                                        | 2                      | 2            | 0             | 0           | 2           | 0                   | 0              | 2              | 3              | 1                      | 0                      | 2              | 3                      | 0             | 2           | 0         | 0          | 3         | 3                         | 2           | 0            | 0          | 0             |
| Detailed recruitment data                                                              | 2                      | 2            | 3             | 1           | 3           | 2                   | 3              | 2              | 3              | 2                      | 2                      | 3              | 1                      | 2             | 3           | 3         | 2          | 3         | 3                         | 3           | 3            | 3          | 3             |
| Statistical assessment of reliability & validity of measurement tool(s) (Quan)         | n/a                    | 0            | 2             | n/a         | n/a         | 0                   | n/a            | 0              | n/a            | n/a                    | n/a                    | n/a            | n/a                    | n/a           | 2           | 0         | 0          | n/a       | n/a                       | n/a         | n/a          | n/a        | n/a           |
| Fit between stated research question & method of data collection (Quan)                | n/a                    | 3            | 3             | n/a         | n/a         | 1                   | n/a            | 2              | n/a            | n/a                    | n/a                    | n/a            | n/a                    | n/a           | 3           | 3         | 0          | n/a       | n/a                       | n/a         | n/a          | n/a        | n/a           |
| Fit between stated research question & format & content of data collection tool (Qual) | 1                      | 3            | 2             | 2           | 3           | 1                   | 0              | 3              | 3              | 0                      | 0                      | 2              | 0                      | 0             | 2           | 1         | 0          | 3         | 1                         | 1           | 0            | 3          | 2             |
| Fit between research question & method of analysis                                     | 3                      | 3            | 3             | 2           | 2           | 1                   | 3              | 3              | 3              | 3                      | 3                      | 0              | 3                      | 3             | 3           | 1         | 2          | 3         | 3                         | 3           | 3            | 3          | 3             |
| Good justification for analytical method selected                                      | 1                      | 2            | 0             | 1           | 2           | 0                   | 0              | 2              | 2              | 0                      | 0                      | 0              | 3                      | 2             | 2           | 0         | 0          | 2         | 3                         | 1           | 0            | 0          | 2             |
| Assessment of reliability of analytical process (Qual)                                 | 0                      | 2            | 0             | 1           | 1           | 0                   | 3              | 2              | 0              | 3                      | 0                      | 0              | 0                      | 0             | 0           | 0         | 0          | 0         | 0                         | 3           | 3            | 0          | 3             |
| Evidence of user involvement in design                                                 | 3                      | 2            | 2             | 0           | 2           | 0                   | 0              | 3              | 1              | 0                      | 0                      | 0              | 0                      | 0             | 0           | 3         | 2          | 2         | 0                         | 1           | 0            | 0          | 3             |
| Strengths & limitations critically discussed                                           | 2                      | 0            | 2             | 1           | 3           | 0                   | 1              | 3              | 3              | 1                      | 1                      | 0              | 1                      | 2             | 2           | 2         | 0          | 3         | 2                         | 3           | 2            | 1          | 3             |
| <b>Total</b>                                                                           | <b>28</b>              | <b>32</b>    | <b>29</b>     | <b>16</b>   | <b>33</b>   | <b>14</b>           | <b>21</b>      | <b>32</b>      | <b>33</b>      | <b>25</b>              | <b>15</b>              | <b>18</b>      | <b>20</b>              | <b>18</b>     | <b>36</b>   | <b>26</b> | <b>16</b>  | <b>33</b> | <b>30</b>                 | <b>30</b>   | <b>23</b>    | <b>22</b>  | <b>32</b>     |
| <b>Max score possible</b>                                                              | <b>42</b>              | <b>48</b>    | <b>48</b>     | <b>42</b>   | <b>42</b>   | <b>48</b>           | <b>42</b>      | <b>48</b>      | <b>42</b>      | <b>42</b>              | <b>42</b>              | <b>42</b>      | <b>42</b>              | <b>42</b>     | <b>48</b>   | <b>48</b> | <b>48</b>  | <b>42</b> | <b>42</b>                 | <b>42</b>   | <b>42</b>    | <b>42</b>  | <b>42</b>     |

Supplementary File 3 – Analytical themes and sub-themes showing link of indicative quotations to barriers and facilitators

| Analytical Theme                                                              | Descriptive Theme                                                 | Data theme                              | Indicative quotations                                                                                                                                                                                                                                                                                                                                                                                                                                                                                                                                                                                                                                                                                                                                                                                                                                         | Barriers/facilitators                                                                                                                                                                                                                                                                                                                      |
|-------------------------------------------------------------------------------|-------------------------------------------------------------------|-----------------------------------------|---------------------------------------------------------------------------------------------------------------------------------------------------------------------------------------------------------------------------------------------------------------------------------------------------------------------------------------------------------------------------------------------------------------------------------------------------------------------------------------------------------------------------------------------------------------------------------------------------------------------------------------------------------------------------------------------------------------------------------------------------------------------------------------------------------------------------------------------------------------|--------------------------------------------------------------------------------------------------------------------------------------------------------------------------------------------------------------------------------------------------------------------------------------------------------------------------------------------|
| Analytical theme 1: Preparation – organisational readiness for implementation | Theme 1.1: Clarifying need & advantage of independent prescribing | Clarifying clinical/service need for IP | <ul style="list-style-type: none"> <li>•“You’re not waiting for medics to .. do your prescribing, you can do it as an autonomous practitioner ...the most crucial aspect of it—continuity of care.”<sup>(1)</sup></li> <li>•“I’m not sure that the qualification would improve my level of patient care [Doctors] sign scripts as required.”<sup>(2)</sup></li> </ul>                                                                                                                                                                                                                                                                                                                                                                                                                                                                                         | F - Clinical/service advantage of IP.<br>B - Lack of clinical/service advantage of IP.                                                                                                                                                                                                                                                     |
|                                                                               |                                                                   | Establishing service pathway gaps       | <ul style="list-style-type: none"> <li>•“Because I have to write, send it to the GP, it has to land on the GP’s desk, then the patient has gotta make an appointment to see that GP, then the prescription comes from the GP, and then they go and fulfil that prescription, and then make an appointment to come back and see me.”<sup>(3)</sup></li> <li>•“I feel reasonably comfortable that we can manage them ..by directing them to the pharmacist or the GP. I don’t feel that it’s particularly hampering my treatment...”<sup>(3)</sup></li> <li>•” “A viable (pharmacist) IP service would depend on successfully addressing the many points in the circuit of prescribing where it can go wrong.”<sup>(4)</sup></li> </ul>                                                                                                                         | F- Identified service pathway gaps.<br>B - Expedient medicines pathways                                                                                                                                                                                                                                                                    |
|                                                                               |                                                                   | Role clarity                            | <ul style="list-style-type: none"> <li>•“When I start working in a practice, I tend to try and agree ground rules, or, rules of engagement....about what it is they want me to do, and if they’re fairly broad, then that’s okay, in some cases they’re fairly narrow..”<sup>(5)</sup></li> <li>•” So basically our p-formulary [personal formulary] has to match up with what we’re doing, and .. that’s when you say, ‘actually no, I’m not prescribing tramadol ‘or I am not prescribing whatever they’re asking for.”<sup>(5)</sup></li> <li>•“I don’t think all our colleagues are clear about non-medical prescribing.”<sup>(6)</sup></li> <li>•“I think as soon as they (reception staff) realize you can prescribe they expect you to be able to do exactly what doctors can do. They don’t understand your limitations....”<sup>(7)</sup></li> </ul> | F- IP role clarity<br>F- Team understanding of IP<br>B - Lack of IP role clarity<br>B - Lack of team understanding of IP                                                                                                                                                                                                                   |
|                                                                               | Theme 1.2: Managerial leadership and support                      | Role of managers                        | <ul style="list-style-type: none"> <li>•“I phoned up for advice...but she (manager) really didn’t know... Anything I knew, I knew myself.”<sup>(8)</sup></li> <li>•“I’ve had nothing but support. They created a consulting room for me, put all the systems in place, the diagnostics, even putting notices in the notice-board for the first year or two so the patients were aware. And the staff were all made aware of it, we have practice meetings, the practice nurse was consulted.”<sup>(9)</sup></li> <li>•“I know I wouldn’t get the support from work for their funding...I would do it, but it’s funding”<sup>(3)</sup></li> <li>•” “I was challenged the other day ... to ask why I hadn’t written end of life charts ...and I wouldn’t do it because I did not have enough medical information about that patient.”<sup>(10)</sup></li> </ul> | F – Medical/managerial support/leadership.<br>F - Stakeholder consultation<br>F - Clinical record/IT access<br>B - Lack of medical/managerial support/leadership.<br>B – Lack of course funding.<br>B - Lack of clinical record/IT access                                                                                                  |
|                                                                               |                                                                   |                                         | Recognising value                                                                                                                                                                                                                                                                                                                                                                                                                                                                                                                                                                                                                                                                                                                                                                                                                                             | <ul style="list-style-type: none"> <li>•“We probably weren’t prepared to remunerate her [nurse prescriber] as much as she thought she should be, because partly in our eyes she wasn’t going to be doing that much extra.”<sup>(9)</sup></li> <li>•“It’s just like having another partner who can deal with certain conditions,</li> </ul> |

## SupplementaryFile3\_V2.0\_19112021

| Analytical Theme                                                                             | Descriptive Theme                            | Data theme                       | Indicative quotations                                                                                                                                                                                                                                                                                                                                                                                                                                                                                                                                                                                                                                                                                            | Barriers/facilitators                                                                                                                |
|----------------------------------------------------------------------------------------------|----------------------------------------------|----------------------------------|------------------------------------------------------------------------------------------------------------------------------------------------------------------------------------------------------------------------------------------------------------------------------------------------------------------------------------------------------------------------------------------------------------------------------------------------------------------------------------------------------------------------------------------------------------------------------------------------------------------------------------------------------------------------------------------------------------------|--------------------------------------------------------------------------------------------------------------------------------------|
|                                                                                              |                                              |                                  | <i>and who also works as a nurse within the practice.</i> <sup>(9)</sup>                                                                                                                                                                                                                                                                                                                                                                                                                                                                                                                                                                                                                                         | B - Lack Medical/managerial support/leadership.                                                                                      |
|                                                                                              |                                              | Culture                          | <ul style="list-style-type: none"> <li>• "I can't imagine how anyone can do our jobs without being a prescriber now ... it has given me another layer of knowledge and, the other side of it is, if you're advising people, you should have that knowledge."<sup>(1)</sup></li> <li>• "... I mean if you want to be a doctor, be a doctor, if you want to be a nurse, be a nurse, but if you're a nurse you can't do nice bits of doctoring that you feel...."<sup>(9)</sup></li> <li>• "In some surgeries generally the nursing team can feel a bit threatened by having pharmacist prescribers, .... It's about identifying our different areas of expertise and.. working together."<sup>(9)</sup></li> </ul> | F - Prescribing integral to advanced practice.<br>B - Prescribing considered outside professional practice scope                     |
|                                                                                              | Theme 1.3: Inter-professional environment    | Inter-professional relationships | <ul style="list-style-type: none"> <li>• "... they've got a good skill mix, so everyone's got their slightly different areas of expertise..." So quite often the doctors will still ring me and say – or pop in and say – what do you recommend for this, what are we supposed to be prescribing for this?<sup>(9)</sup></li> <li>• "...the engagement from Doctor... as the sort of the overall lead GP for that care home, was very disappointing".<sup>(11)</sup></li> <li>• "It was building that trust that you could do it, and you...were competent...you observed safety aspects."<sup>(12)</sup></li> </ul>                                                                                             | F - Established physician relationships.<br>F - Good inter-professional relationships<br>B - Poor/absent physician relationships     |
|                                                                                              |                                              | Communication & collaboration    | <ul style="list-style-type: none"> <li>• "We have regular clinical meetings as a practice – myself, the GPs and the nurse. And then we also have multidisciplinary meetings every 6–8 weeks."<sup>(9)</sup></li> <li>• "I don't really feel they'd (GPs) listen to me...they'd be like, well, we're GPs, we're the partners here, we make the decisions and that's final really. I do feel it's a fait accompli here...this is the way this place has been run for a long, long time."<sup>(9)</sup></li> </ul>                                                                                                                                                                                                  | F - Inter-professional collaboration/communication networks.<br>B - Lack of inter-professional collaboration/communication networks. |
| Analytical theme 2: Training – optimising practitioner readiness for independent prescribing | Theme 2.1: Selecting the right practitioners | Selection                        | <ul style="list-style-type: none"> <li>• "I presume I need to do a minor illness course first, which my GP has not agreed to for last three years."<sup>(2)</sup></li> <li>• "I wanted to do the nurse prescribing course for two years .. my employing GPs will not support me, even though all my work is in extended or advanced role."<sup>(2)</sup></li> </ul>                                                                                                                                                                                                                                                                                                                                              | B - Inconsistent selection policies<br>B - Lack of workforce planning.                                                               |
|                                                                                              |                                              | Skills & aptitudes               | <ul style="list-style-type: none"> <li>• "You have to be competent, not only with your history taking... but examination skills; you have to be able to relate those findings... to the patient in a language that they can understand."<sup>(13)</sup></li> <li>• "I think that is very important that they don't skimp. When I come in she'll take my weight, do my feet, do my blood pressure, want to know when I last had my eyes checked. .. I have all the blood tests done, and we go through those, what's wrong, what's right."<sup>(14)</sup></li> <li>• "I would definitely come back to see the nurse prescriber again; I don't</li> </ul>                                                          | F - Practitioner specialist skills<br>F - Service user acceptance of IP.<br>B - Lack of practitioner specialist skills.              |

SupplementaryFile3\_V2.0\_19112021

| Analytical Theme                                                    | Descriptive Theme                                                 | Data theme                                                                                                                                                                                                                                                                                                                                                                                                                                                                                     | Indicative quotations                                                                                                                                                                                                                                                                                                                                                                                                                                                                                                                                                                                                                                                                                                                                                 | Barriers/facilitators                                                                                                                                   |
|---------------------------------------------------------------------|-------------------------------------------------------------------|------------------------------------------------------------------------------------------------------------------------------------------------------------------------------------------------------------------------------------------------------------------------------------------------------------------------------------------------------------------------------------------------------------------------------------------------------------------------------------------------|-----------------------------------------------------------------------------------------------------------------------------------------------------------------------------------------------------------------------------------------------------------------------------------------------------------------------------------------------------------------------------------------------------------------------------------------------------------------------------------------------------------------------------------------------------------------------------------------------------------------------------------------------------------------------------------------------------------------------------------------------------------------------|---------------------------------------------------------------------------------------------------------------------------------------------------------|
|                                                                     |                                                                   |                                                                                                                                                                                                                                                                                                                                                                                                                                                                                                | <i>see that there's any difference really between seeing the doctor or the nurse prescriber. The nurse prescriber seems to have just as much knowledge as the doctor...</i> <sup>(15)</sup>                                                                                                                                                                                                                                                                                                                                                                                                                                                                                                                                                                           |                                                                                                                                                         |
|                                                                     |                                                                   | Motivation & commitment                                                                                                                                                                                                                                                                                                                                                                                                                                                                        | <ul style="list-style-type: none"> <li>•<i>"I don't think we get paid enough to make those decisions."</i><sup>(3)</sup></li> <li>•<i>"I have undertaken a large amount of further training ..with very little financial remuneration.. in my leisure time, to the exclusion of leisure activities. Eventually, one would hope for some incentive beyond job satisfaction."</i><sup>(2)</sup></li> <li>•<i>"The patients are aware of your skills and they know you're making decisions and prescribing for them. It gives you a sense of satisfaction."</i><sup>(6)</sup></li> <li>•<i>"For me prescribing right does carry a lot of accountability and responsibility and .. I'm not sure that's something I'd want to take on board."</i><sup>(3)</sup></li> </ul> | F - Professional/personal adoption incentive<br>B - Lack of professional/personal adoption incentive<br>B - Fear of responsibility/accountability/error |
|                                                                     | Theme 2.2: Preparing and supporting practitioners during training | Expectations of training                                                                                                                                                                                                                                                                                                                                                                                                                                                                       | <ul style="list-style-type: none"> <li>•<i>"Reassurance that I could do [the course] with present qualifications or what I need to do to obtain these before I do the prescriber's course."</i><sup>(2)</sup></li> <li>•<i>"Nurses that have done course say [very] intense and difficult."</i><sup>(2)</sup></li> <li>•<i>"Need info about what it involves, assessment, funding etc. Also general career advice."</i><sup>(2)</sup></li> </ul>                                                                                                                                                                                                                                                                                                                      | B - Lack of course information.                                                                                                                         |
| Study leave                                                         |                                                                   | <ul style="list-style-type: none"> <li>•<i>"As much as I would like but there be no-one doing my work while I am away...have to catch up."</i><sup>(16)</sup></li> <li>•<i>"I plan to do asthma training and then like to do minor illness training, but when I do I will have to do most of it in my own time – this puts me off nurse prescribing."</i><sup>(2)</sup></li> </ul>                                                                                                             | B - Lack of backfill/protected/study time                                                                                                                                                                                                                                                                                                                                                                                                                                                                                                                                                                                                                                                                                                                             |                                                                                                                                                         |
| Designated Medical Practitioners                                    |                                                                   | <ul style="list-style-type: none"> <li>•<i>"I think when we did our prescribing training ... some of us had a lot of very .. proactive support from the medical mentors and some of us had less than that."</i><sup>(10)</sup></li> <li>•<i>"I had to educate (DMP).. on how the course works."</i><sup>(17)</sup></li> <li>•<i>"...I think the two of us were kind of floundering a bit ... we still had slightly differing ideas as to what competency meant."</i><sup>(17)</sup></li> </ul> | F - DMP role clarity/good DMP supervision.<br>B - Lack of DMP role clarity/supervision/availability.                                                                                                                                                                                                                                                                                                                                                                                                                                                                                                                                                                                                                                                                  |                                                                                                                                                         |
| Analytical theme 3: Transition - ensuring early prescribing support | Theme 3.1: Transition as a point of vulnerability                 | Self-confidence                                                                                                                                                                                                                                                                                                                                                                                                                                                                                | <ul style="list-style-type: none"> <li>•<i>"When you've done the course, you lose a lot of confidence, because you learn a lot more about, you know the dilemmas and the ethics of prescribing... so, then, it's actually harder to prescribe (it) independently."</i><sup>(5)</sup></li> <li>•<i>"In some ways, it's like motherhood I think, you feel adequately prepared and then it happens and I think oh my goodness, this is bigger than I thought..."</i><sup>(1)</sup></li> <li>•<i>"I think they [doctors] sort of assume sometimes that we know more than we do, and I think they assume we have huge confidence in our skills when we don't..."</i><sup>(12)</sup></li> </ul>                                                                             | F - Prescribing confidence/competence.<br>B - Lack of prescribing confidence/competence.                                                                |
|                                                                     | Theme 3.2: Nurturing confidence                                   | Minimum competence                                                                                                                                                                                                                                                                                                                                                                                                                                                                             | <ul style="list-style-type: none"> <li>•<i>"I have quite a limited range that I feel confident doing, using and I haven't gone outside it..."</i><sup>(12)</sup></li> <li>•<i>"I think you have got to realize your limitations and put a stop on it when you feel your skills aren't adequate."</i><sup>(7)</sup></li> </ul>                                                                                                                                                                                                                                                                                                                                                                                                                                         | F - Delineated scope of prescribing competence<br>F - Clinical/professional protocols/guidelines.                                                       |

## SupplementaryFile3\_V2.0\_19112021

| Analytical Theme                                                                    | Descriptive Theme                         | Data theme                        | Indicative quotations                                                                                                                                                                                                                                                                                                                                                                                                                                                                                                                                                                                                                                                                                                                                                                                                                                                                       | Barriers/facilitators                                                                                                                  |
|-------------------------------------------------------------------------------------|-------------------------------------------|-----------------------------------|---------------------------------------------------------------------------------------------------------------------------------------------------------------------------------------------------------------------------------------------------------------------------------------------------------------------------------------------------------------------------------------------------------------------------------------------------------------------------------------------------------------------------------------------------------------------------------------------------------------------------------------------------------------------------------------------------------------------------------------------------------------------------------------------------------------------------------------------------------------------------------------------|----------------------------------------------------------------------------------------------------------------------------------------|
|                                                                                     | and competence                            |                                   | <ul style="list-style-type: none"> <li>•“I do know where my competencies are and where my weaknesses are, and I don't sort of go beyond my scope of practice.”<sup>(9)</sup></li> <li>•“I suppose virtually everything that I see and talk about is influenced by NICE in the first instance, and the relevant NICE guidance, whatever it might be.”<sup>(18)</sup></li> <li>•“I'm happy with exacerbations and chest infections, so, like UTIs [urinary tract infections] and wound infections, but anything that's going beyond that I just don't feel confident in myself to be going out and doing that.”<sup>(12)</sup></li> </ul>                                                                                                                                                                                                                                                     | F - Adequate formulary<br>B - Inappropriate patient/team pressure for prescribing<br>B – Unclear/absent clinical protocols/ guidelines |
|                                                                                     |                                           | Experience & exposure             | <ul style="list-style-type: none"> <li>•“The first time I had to ask the GP if I was actually on the right lines.. It's not as difficult the second and the third and the fourth time.”<sup>(8)</sup></li> <li>•“It's like learning to drive and then the first time you actually go out without someone sat by you ...”<sup>(1)</sup></li> <li>•“Most of my colleagues have stuck with their original prescribing competence. I reacted to questions that were being asked – could you do X? So I thought, well, could I do X? And I've then made myself competent in that particular area.”<sup>(9)</sup></li> <li>•“. . .as I've become more experienced. . .I'm more aware now, I suppose, of the – the complexities of certain patients.”<sup>(19)</sup></li> </ul>                                                                                                                    | F - Exposure to prescribing opportunity<br>B - Delayed registration post qualification                                                 |
|                                                                                     | Theme 3.3: Transition support needs       | Informal & formal support systems | <ul style="list-style-type: none"> <li>•“I suppose the bottom line is I don't get any formal support. I mean, I get support in an informal way from GPs and the consultant and my colleagues.”<sup>(12)</sup></li> <li>•“There are times when .. it's slightly more complex, so .. I'll go and get some advice.. I think it's really important to function in this way.”<sup>(9)</sup></li> <li>•“If I am in any whatsoever doubt then I just buzz through to the GP (family physician).”<sup>(5)</sup></li> </ul>                                                                                                                                                                                                                                                                                                                                                                          | F – Medical supervision.<br>B – Lack of medical supervision.                                                                           |
| Analytical theme 4: Sustainment - maximising and developing independent prescribing | Theme 4.1: Service delivery               | Impact on workload                | <ul style="list-style-type: none"> <li>•“A big disadvantage is that a lot of doctors have offloaded their work on to us. Workload has increased so much and you have to go to a lot of meetings, often in your own time.”<sup>(7)</sup></li> <li>•“We're really, really fortunate here. . .our appointment times, if you're booked into the nurse clinic, they're half-hour appointments, so we can really spend time providing the education and explaining why we're not giving antibiotics.”<sup>(19)</sup></li> <li>•“Oh, it has changed dramatically. Workload had trebled. We see most of the minor ailments. We have taken a lot more on—the more knowledge you get the higher the workload. We do all medication reviews and all hypertension reviews.”<sup>(7)</sup></li> <li>•“Non-medical prescribing consultations—the time tends to be much longer.”<sup>(20)</sup></li> </ul> | F - Consultation time.<br>B - Time/workload constraints.                                                                               |
|                                                                                     | Theme 4.2: Supporting IP role development | Role/service expansion            | <ul style="list-style-type: none"> <li>•“I don't see how that (mental health NMP scope extension for benzodiazepine management) could happen with the QOF (Quality and Outcomes Framework) targets ... For (mental health) there's not a target ... so I genuinely don't think it's going to become part of the practice nurses remit.”<sup>(20)</sup></li> <li>•“I'd like to put my name somewhere regularly along with the doctors... so</li> </ul>                                                                                                                                                                                                                                                                                                                                                                                                                                       | F – Employment model.<br>F - National incentives/policy initiatives for IP<br>B – Employment model.<br>B - IP Role isolation.          |

## SupplementaryFile3\_V2.0\_19112021

| Analytical Theme | Descriptive Theme | Data theme                         | Indicative quotations                                                                                                                                                                                                                                                                                                                                                                                                                                                                                                                                                                                                                                                                                                                                                                                                                                                                                                                                                                                                                                                                                                                    | Barriers/facilitators                                                                                                                                |
|------------------|-------------------|------------------------------------|------------------------------------------------------------------------------------------------------------------------------------------------------------------------------------------------------------------------------------------------------------------------------------------------------------------------------------------------------------------------------------------------------------------------------------------------------------------------------------------------------------------------------------------------------------------------------------------------------------------------------------------------------------------------------------------------------------------------------------------------------------------------------------------------------------------------------------------------------------------------------------------------------------------------------------------------------------------------------------------------------------------------------------------------------------------------------------------------------------------------------------------|------------------------------------------------------------------------------------------------------------------------------------------------------|
|                  |                   |                                    | <p><i>I'm there...part of the surgery. But because ... I'm not employed by the surgery, other than being extra, additional help occasionally... it kind of leaves me in a bit of no-man's land.</i><sup>(9)</sup></p> <ul style="list-style-type: none"> <li>•<i>"It's altered my role quite in depth ... We see anything from an ingrown toenail to somebody with chest pain. In the afternoon we work on an appointment basis, running chronic disease .. and weight management clinics."</i><sup>(7)</sup></li> <li>•<i>"I found myself being given referrals for much more complex problems than perhaps I had been given before. I found myself in the position where GPs were actually expecting me to initiate treatment or to suggest what treatment they might give."</i><sup>(8)</sup></li> <li>•<i>"I have learnt over the years... extending my scope of practice as I felt more confident, and then went and sort of commissioned training or shadowed somebody, just so that I can improve my competencies and take on more of the long-term conditions and manage them in general practice."</i><sup>(9)</sup></li> </ul> | <p>B – Lack of national incentives/policy initiatives for IP<br/>B - Lack of local policies for IP</p>                                               |
|                  |                   | Continued professional development | <ul style="list-style-type: none"> <li>•<i>"Expanding your prescribing may be difficult, not because of your knowledge of the drugs, but because there's no training at a good enough level for the other stuff, .. how do you become competent to treat osteoporosis, there are no courses."</i><sup>(5)</sup></li> <li>•<i>"I don't think I have increased my scope over the years; to be frank."</i><sup>(12)</sup></li> <li>•<i>"Most of my colleagues have stuck with their original prescribing competence. I reacted to questions ... could you do X?... And I've then made myself competent..."</i><sup>(9)</sup></li> <li>•<i>"...what I would love is to sort of have a week or two a year when I was buddied up with a doctor, and he/she made me do all the prescribing. It would be terrifying but it would really make me learn."</i><sup>(12)</sup></li> <li>•<i>"We take group learning very seriously, we have clinical catch up ... where if anyone has found any new exciting evidence or guidelines or examples of good practice we do tend to talk inter-professionally."</i><sup>(18)</sup></li> </ul>             | <p>F - CPD/supervision<br/>B - Lack of CPD/supervision</p>                                                                                           |
|                  |                   | Evaluation & Reflection            | <ul style="list-style-type: none"> <li>•<i>"...it's something that's a .. priority.. for me and my team here, so we're doing a lot of work .., both in terms of auditing, so we understand how much prescribing's going on. We also are looking at appropriateness of prescribing, so auditing case notes against the local guidelines and providing feedback to prescribers...So it's high up on our agenda."</i><sup>(19)</sup></li> <li>•<i>"No. I haven't had a prescribing update. Even trying to get an update on how to use your British National Formulary, any new drugs, is difficult."</i><sup>(6)</sup></li> <li>•<i>"[W]e have a training session, like an audit with the local CCG team, in relation to our practices antibiotic prescribing and comparing it to the area in the north west... so that kind of helped influence .. my antibiotic prescribing."</i><sup>(13)</sup></li> <li>•<i>"...we don't as a group kind of get together... as clinicians and feeding</i></li> </ul>                                                                                                                                    | <p>F - Audit/feedback on prescribing practice.<br/>B - Governance/accountability structures<br/>B - Lack of governance/accountability structures</p> |

SupplementaryFile3\_V2.0\_19112021

| Analytical Theme | Descriptive Theme | Data theme | Indicative quotations                                                                                                  | Barriers/facilitators |
|------------------|-------------------|------------|------------------------------------------------------------------------------------------------------------------------|-----------------------|
|                  |                   |            | <i>back information, events that have happened ... significant events ... we don't have joint CPD.</i> <sup>(18)</sup> |                       |

CCG – clinical commissioning group, CFIR – Consolidated Framework for Implementation Research, CPD – continued professional development, DMP – designated medical practitioner, DOI – Diffusion of Innovations, IP – independent prescribing.

1. Latham K, Nyatanga B. Community palliative care clinical nurse specialists as independent prescribers: part 2. *British Journal of Community Nursing* 2018;23(3):126-133. doi: 10.12968/bjcn.2018.23.3.126
2. Kelly A, Neale J, Rollings R. Barriers to extended nurse prescribing among practice nurses. *Community Practice* 2010;83(1):21-24.
3. Holden MA, Whittle R, Waterfield J, et al. A mixed methods exploration of physiotherapist's approaches to analgesic use among patients with hip osteoarthritis. *Physiotherapy* 2019;105(3):328-337. doi: 10.1016/j.physio.2018.08.003
4. Lane K, Bond C, Wright D, et al. "Everyone needs to understand each other's systems": Stakeholder views on the acceptability and viability of a Pharmacist Independent Prescriber role in care homes for older people in the UK. *Health & Social Care in the Community* 2020;28(5):1479-1487. doi: <https://doi.org/10.1111/hsc.12970>
5. Maddox C, Halsall D, Hall J, et al. Factors influencing nurse and pharmacist willingness to take or not take responsibility for non-medical prescribing. *Research in Social and Administrative Pharmacy* 2016;12(1):41-55. doi: 10.1016/j.sapharm.2015.04.001
6. Cousins R, Donnell C. Nurse prescribing in general practice: a qualitative study of job satisfaction and work-related stress. *Family Practice* 2012;29(2):223-227. doi: 10.1093/fampra/cm077
7. Daughtry J, Hayter M. A qualitative study of practice nurses' prescribing experiences. *Practice Nursing* 2010;21(6):310-314. doi: 10.12968/pnur.2010.21.6.48329
8. Downer F, Shepherd CK. District nurses prescribing as nurse independent prescribers. *British Journal of Community Nursing* 2010;15(7):348-352.
9. Weiss MC, Platt J, Riley R, et al. GPs, nurses and pharmacists as prescribers in primary care: an exploration using the social identity approach / Hausärzte/-innen, Diplomierte Pflegefachpersonen und Apotheker/-innen als Arzneimittelverschreiber/-innen: eine Exploration mit dem Ansatz der Sozialen Identität. *International Journal of the Health Professions* 2016;3(2):153-164. doi: doi.org/10.1515/ijhp-2016-0023
10. Cole T, Gillett K. Are nurse prescribers issuing prescriptions in palliative care? *Nurse Prescribing* 2015;13(2):98-102. doi: 10.12968/npre.2015.13.2.98
11. Inch J, Notman F, Bond CM, et al. The Care Home Independent Prescribing Pharmacist Study (CHIPPS) - a non-randomised feasibility study of independent pharmacist prescribing in care homes. *Pilot and Feasibility Studies* 2019;5:89. doi: 10.1186/s40814-019-0465-y [published Online First: 2019/07/25]



SupplementaryFile3\_V2.0\_19112021

12. Herklots A, Baileff A, Latter S. Community matrons' experience as independent prescribers. *British Journal of Community Nursing* 2015;20(5):217. doi: 10.12968/bjcn.2015.20.5.217
13. Courtenay M, Rowbotham S, Lim R, et al. Examining influences on antibiotic prescribing by nurse and pharmacist prescribers: a qualitative study using the Theoretical Domains Framework and COM-B. *BMJ Open* 2019;9(6):e029177. doi: 10.1136/bmjopen-2019-029177
14. Courtenay M, Stenner K, Carey N. The views of patients with diabetes about nurse prescribing. *Diabetic Medicine* 2010;27(9):1049-1054. doi: 10.1111/j.1464-5491.2010.03051.x
15. Dhalivaal J. Patients' perspectives on prescribing by nurses in general practice. *Practice Nursing* 2011;22(1):41-46.
16. Boreham N, Coull AF, Murray ID, et al. Education programmes preparing independent prescribers in Scotland: an evaluation. *Nurse Education Today* 2013;33(4):321-326. doi: 10.1016/j.nedt.2013.01.018
17. Afseth JD, Paterson RE. The views of non-medical prescribing students and medical mentors on interprofessional competency assessment – A qualitative exploration. *Nurse Education Today* 2017;52:103-108. doi: 10.1016/j.nedt.2017.02.022
18. Carter M, Chapman S, Watson MC. Multiplicity and complexity: a qualitative exploration of influences on prescribing in UK general practice. *BMJ Open* 2021;11(1):e041460. doi: 10.1136/bmjopen-2020-041460
19. Williams SJ, Halls AV, Tonkin-Crine S, et al. General practitioner and nurse prescriber experiences of prescribing antibiotics for respiratory tract infections in UK primary care out-of-hours services (the UNITE study). *Journal of Antimicrobial Chemotherapy* 2018;73(3):795-803. doi: 10.1093/jac/dkx429
20. Brodie L, Donaldson J, Watt S. Non-medical prescribers and benzodiazepines: A qualitative study. *Nurse Prescribing* 2014;12(7):353-359.

# Reporting checklist for systematic review and meta-analysis. CRD42019124400

Based on the PRISMA guidelines.

## Instructions to authors

Complete this checklist by entering the page numbers from your manuscript where readers will find each of the items listed below.

Your article may not currently address all the items on the checklist. Please modify your text to include the missing information. If you are certain that an item does not apply, please write "n/a" and provide a short explanation.

Upload your completed checklist as an extra file when you submit to a journal.

In your methods section, say that you used the PRISMA reporting guidelines, and cite them as:

Moher D, Liberati A, Tetzlaff J, Altman DG, The PRISMA Group. Preferred Reporting Items for Systematic Reviews and Meta-Analyses: The PRISMA Statement

|                     | Reporting Item                                                                                                                                                                                                                                                                                                                | Page Number |
|---------------------|-------------------------------------------------------------------------------------------------------------------------------------------------------------------------------------------------------------------------------------------------------------------------------------------------------------------------------|-------------|
| <b>Title</b>        |                                                                                                                                                                                                                                                                                                                               |             |
|                     | <a href="#">#1</a> Identify the report as a systematic review, meta-analysis, or both.                                                                                                                                                                                                                                        | 1           |
| <b>Abstract</b>     |                                                                                                                                                                                                                                                                                                                               |             |
| Structured summary  | <a href="#">#2</a> Provide a structured summary including, as applicable: background; objectives; data sources; study eligibility criteria, participants, and interventions; study appraisal and synthesis methods; results; limitations; conclusions and implications of key findings; systematic review registration number | 2           |
| <b>Introduction</b> |                                                                                                                                                                                                                                                                                                                               |             |
| Rationale           | <a href="#">#3</a> Describe the rationale for the review in the context of what is already known.                                                                                                                                                                                                                             | 4           |

|    |                                    |                     |                                                                                                                                                                                                                                 |                      |
|----|------------------------------------|---------------------|---------------------------------------------------------------------------------------------------------------------------------------------------------------------------------------------------------------------------------|----------------------|
| 1  | Objectives                         | <a href="#">#4</a>  | Provide an explicit statement of questions being addressed with reference to participants, interventions, comparisons, outcomes, and study design (PICOS).                                                                      | 5                    |
| 2  |                                    |                     |                                                                                                                                                                                                                                 |                      |
| 3  |                                    |                     |                                                                                                                                                                                                                                 |                      |
| 4  |                                    |                     |                                                                                                                                                                                                                                 |                      |
| 5  |                                    |                     |                                                                                                                                                                                                                                 |                      |
| 6  | <b>Methods</b>                     |                     |                                                                                                                                                                                                                                 |                      |
| 7  |                                    |                     |                                                                                                                                                                                                                                 |                      |
| 8  |                                    |                     |                                                                                                                                                                                                                                 |                      |
| 9  | Protocol and registration          | <a href="#">#5</a>  | Indicate if a review protocol exists, if and where it can be accessed (e.g., Web address) and, if available, provide registration information including the registration number.                                                | 5                    |
| 10 |                                    |                     |                                                                                                                                                                                                                                 |                      |
| 11 |                                    |                     |                                                                                                                                                                                                                                 |                      |
| 12 |                                    |                     |                                                                                                                                                                                                                                 |                      |
| 13 |                                    |                     |                                                                                                                                                                                                                                 |                      |
| 14 |                                    |                     |                                                                                                                                                                                                                                 |                      |
| 15 | Eligibility criteria               | <a href="#">#6</a>  | Specify study characteristics (e.g., PICOS, length of follow-up) and report characteristics (e.g., years considered, language, publication status) used as criteria for eligibility, giving rational                            | 6                    |
| 16 |                                    |                     |                                                                                                                                                                                                                                 |                      |
| 17 |                                    |                     |                                                                                                                                                                                                                                 |                      |
| 18 |                                    |                     |                                                                                                                                                                                                                                 |                      |
| 19 |                                    |                     |                                                                                                                                                                                                                                 |                      |
| 20 |                                    |                     |                                                                                                                                                                                                                                 |                      |
| 21 |                                    |                     |                                                                                                                                                                                                                                 |                      |
| 22 | Information sources                | <a href="#">#7</a>  | Describe all information sources in the search (e.g., databases with dates of coverage, contact with study authors to identify additional studies) and date last searched.                                                      | 6                    |
| 23 |                                    |                     |                                                                                                                                                                                                                                 |                      |
| 24 |                                    |                     |                                                                                                                                                                                                                                 |                      |
| 25 |                                    |                     |                                                                                                                                                                                                                                 |                      |
| 26 |                                    |                     |                                                                                                                                                                                                                                 |                      |
| 27 |                                    |                     |                                                                                                                                                                                                                                 |                      |
| 28 |                                    |                     |                                                                                                                                                                                                                                 |                      |
| 29 | Search                             | <a href="#">#8</a>  | Present full electronic search strategy for at least one database, including any limits used, such that it could be repeated.                                                                                                   | Supplementary file 1 |
| 30 |                                    |                     |                                                                                                                                                                                                                                 |                      |
| 31 |                                    |                     |                                                                                                                                                                                                                                 |                      |
| 32 |                                    |                     |                                                                                                                                                                                                                                 |                      |
| 33 |                                    |                     |                                                                                                                                                                                                                                 |                      |
| 34 | Study selection                    | <a href="#">#9</a>  | State the process for selecting studies (i.e., for screening, for determining eligibility, for inclusion in the systematic review, and, if applicable, for inclusion in the meta-analysis).                                     | 6                    |
| 35 |                                    |                     |                                                                                                                                                                                                                                 |                      |
| 36 |                                    |                     |                                                                                                                                                                                                                                 |                      |
| 37 |                                    |                     |                                                                                                                                                                                                                                 |                      |
| 38 |                                    |                     |                                                                                                                                                                                                                                 |                      |
| 39 |                                    |                     |                                                                                                                                                                                                                                 |                      |
| 40 |                                    |                     |                                                                                                                                                                                                                                 |                      |
| 41 | Data collection process            | <a href="#">#10</a> | Describe the method of data extraction from reports (e.g., piloted forms, independently by two reviewers) and any processes for obtaining and confirming data from investigators.                                               | 7                    |
| 42 |                                    |                     |                                                                                                                                                                                                                                 |                      |
| 43 |                                    |                     |                                                                                                                                                                                                                                 |                      |
| 44 |                                    |                     |                                                                                                                                                                                                                                 |                      |
| 45 |                                    |                     |                                                                                                                                                                                                                                 |                      |
| 46 |                                    |                     |                                                                                                                                                                                                                                 |                      |
| 47 |                                    |                     |                                                                                                                                                                                                                                 |                      |
| 48 | Data items                         | <a href="#">#11</a> | List and define all variables for which data were sought (e.g., PICOS, funding sources), and any assumptions and simplifications made.                                                                                          | 7                    |
| 49 |                                    |                     |                                                                                                                                                                                                                                 |                      |
| 50 |                                    |                     |                                                                                                                                                                                                                                 |                      |
| 51 |                                    |                     |                                                                                                                                                                                                                                 |                      |
| 52 |                                    |                     |                                                                                                                                                                                                                                 |                      |
| 53 | Risk of bias in individual studies | <a href="#">#12</a> | Describe methods used for assessing risk of bias in individual studies (including specification of whether this was done at the study or outcome level, or both), and how this information is to be used in any data synthesis. | N/A                  |
| 54 |                                    |                     |                                                                                                                                                                                                                                 |                      |
| 55 |                                    |                     |                                                                                                                                                                                                                                 |                      |
| 56 |                                    |                     |                                                                                                                                                                                                                                 |                      |
| 57 |                                    |                     |                                                                                                                                                                                                                                 |                      |
| 58 |                                    |                     |                                                                                                                                                                                                                                 |                      |
| 59 |                                    |                     |                                                                                                                                                                                                                                 |                      |
| 60 |                                    |                     |                                                                                                                                                                                                                                 |                      |

|    |                 |                     |                                                                         |               |
|----|-----------------|---------------------|-------------------------------------------------------------------------|---------------|
| 1  | Summary         | <a href="#">#13</a> | State the principal summary measures (e.g., risk ratio,                 | N/A           |
| 2  | measures        |                     | difference in means).                                                   |               |
| 3  |                 |                     |                                                                         |               |
| 4  | Planned         | <a href="#">#14</a> | Describe the methods of handling data and combining                     | 7             |
| 5  | methods of      |                     | results of studies, if done, including measures of                      |               |
| 6  | analysis        |                     | consistency (e.g., I <sup>2</sup> ) for each meta-analysis.             |               |
| 7  |                 |                     |                                                                         |               |
| 8  | Risk of bias    | <a href="#">#15</a> | Specify any assessment of risk of bias that may affect                  | N/A           |
| 9  | across studies  |                     | the cumulative evidence (e.g., publication bias, selective              |               |
| 10 |                 |                     | reporting within studies).                                              |               |
| 11 |                 |                     |                                                                         |               |
| 12 | Additional      | <a href="#">#16</a> | Describe methods of additional analyses (e.g.,                          | N/A           |
| 13 | analyses        |                     | sensitivity or subgroup analyses, meta-regression), if                  |               |
| 14 |                 |                     | done, indicating which were pre-specified.                              |               |
| 15 |                 |                     |                                                                         |               |
| 16 |                 |                     |                                                                         |               |
| 17 |                 |                     |                                                                         |               |
| 18 |                 |                     |                                                                         |               |
| 19 |                 |                     |                                                                         |               |
| 20 | <b>Results</b>  |                     |                                                                         |               |
| 21 |                 |                     |                                                                         |               |
| 22 | Study selection | <a href="#">#17</a> | Give numbers of studies screened, assessed for                          | 7,            |
| 23 |                 |                     | eligibility, and included in the review, with reasons for               |               |
| 24 |                 |                     | exclusions at each stage, ideally with a <a href="#">flow diagram</a> . | Figure 1      |
| 25 |                 |                     |                                                                         | PRISMA        |
| 26 |                 |                     |                                                                         |               |
| 27 |                 |                     |                                                                         |               |
| 28 |                 |                     |                                                                         |               |
| 29 | Study           | <a href="#">#18</a> | For each study, present characteristics for which data                  | 8,            |
| 30 | characteristics |                     | were extracted (e.g., study size, PICOS, follow-up                      |               |
| 31 |                 |                     | period) and provide the citation.                                       |               |
| 32 |                 |                     |                                                                         |               |
| 33 |                 |                     |                                                                         |               |
| 34 | Risk of bias    | <a href="#">#19</a> | Present data on risk of bias of each study and, if                      | N/A           |
| 35 | within studies  |                     | available, any outcome-level assessment (see Item 12).                  |               |
| 36 |                 |                     |                                                                         |               |
| 37 |                 |                     |                                                                         |               |
| 38 | Results of      | <a href="#">#20</a> | For all outcomes considered (benefits and harms),                       | N/A           |
| 39 | individual      |                     | present, for each study: (a) simple summary data for                    |               |
| 40 | studies         |                     | each intervention group and (b) effect estimates and                    |               |
| 41 |                 |                     | confidence intervals, ideally with a forest plot.                       |               |
| 42 |                 |                     |                                                                         |               |
| 43 |                 |                     |                                                                         |               |
| 44 |                 |                     |                                                                         |               |
| 45 | Synthesis of    | <a href="#">#21</a> | Present the main results of the review. If meta-analyses                | 8-25          |
| 46 | results         |                     | are done, include for each, confidence intervals and                    |               |
| 47 |                 |                     | measures of consistency.                                                |               |
| 48 |                 |                     |                                                                         |               |
| 49 |                 |                     |                                                                         |               |
| 50 | Risk of bias    | <a href="#">#22</a> | Present results of any assessment of risk of bias across                | Supplementary |
| 51 | across studies  |                     | studies (see Item 15).                                                  | file 2        |
| 52 |                 |                     |                                                                         |               |
| 53 |                 |                     |                                                                         |               |
| 54 | Additional      | <a href="#">#23</a> | Give results of additional analyses, if done (e.g.,                     | N/A           |
| 55 | analysis        |                     | sensitivity or subgroup analyses, meta-regression [see                  |               |
| 56 |                 |                     | Item 16)].                                                              |               |
| 57 |                 |                     |                                                                         |               |
| 58 |                 |                     |                                                                         |               |
| 59 |                 |                     |                                                                         |               |
| 60 |                 |                     |                                                                         |               |

## Discussion

Summary of Evidence [#24](#) Summarize the main findings, including the strength of evidence for each main outcome; consider their relevance to key groups (e.g., health care providers, users, and policy makers) 17, 26

Limitations [#25](#) Discuss limitations at study and outcome level (e.g., risk of bias), and at review level (e.g., incomplete retrieval of identified research, reporting bias). 28

Conclusions [#26](#) Provide a general interpretation of the results in the context of other evidence, and implications for future research. 28

## Funding

Funding [#27](#) Describe sources of funding or other support (e.g., supply of data) for the systematic review; role of funders for the systematic review. 30

None The PRISMA checklist is distributed under the terms of the Creative Commons Attribution License CC-BY. This checklist can be completed online using <https://www.goodreports.org/>, a tool made by the [EQUATOR Network](#) in collaboration with [Penelope.ai](#)

# BMJ Open

## Barriers and facilitators to implementation of non-medical independent prescribing in primary care in the United Kingdom: a qualitative systematic review.

|                                 |                                                                                                                                                                                                                                                                                                                                                                                                           |
|---------------------------------|-----------------------------------------------------------------------------------------------------------------------------------------------------------------------------------------------------------------------------------------------------------------------------------------------------------------------------------------------------------------------------------------------------------|
| Journal:                        | <i>BMJ Open</i>                                                                                                                                                                                                                                                                                                                                                                                           |
| Manuscript ID                   | bmjopen-2021-052227.R2                                                                                                                                                                                                                                                                                                                                                                                    |
| Article Type:                   | Original research                                                                                                                                                                                                                                                                                                                                                                                         |
| Date Submitted by the Author:   | 19-May-2022                                                                                                                                                                                                                                                                                                                                                                                               |
| Complete List of Authors:       | Edwards, Judith; University of Surrey Faculty of Health and Medical Sciences, School of Health Sciences<br>Coward, Melaine; University of Surrey Faculty of Health and Medical Sciences, School of Health Sciences<br>Carey, Nicola; University of Surrey Faculty of Health and Medical Sciences, School of Health Sciences; University of the Highlands and Islands, Department of Nursing and Midwifery |
| <b>Primary Subject Heading</b>: | Health services research                                                                                                                                                                                                                                                                                                                                                                                  |
| Secondary Subject Heading:      | Health policy, General practice / Family practice                                                                                                                                                                                                                                                                                                                                                         |
| Keywords:                       | PRIMARY CARE, Health policy < HEALTH SERVICES ADMINISTRATION & MANAGEMENT, Organisational development < HEALTH SERVICES ADMINISTRATION & MANAGEMENT                                                                                                                                                                                                                                                       |
|                                 |                                                                                                                                                                                                                                                                                                                                                                                                           |

SCHOLARONE™  
Manuscripts



I, the Submitting Author has the right to grant and does grant on behalf of all authors of the Work (as defined in the below author licence), an exclusive licence and/or a non-exclusive licence for contributions from authors who are: i) UK Crown employees; ii) where BMJ has agreed a CC-BY licence shall apply, and/or iii) in accordance with the terms applicable for US Federal Government officers or employees acting as part of their official duties; on a worldwide, perpetual, irrevocable, royalty-free basis to BMJ Publishing Group Ltd ("BMJ") its licensees and where the relevant Journal is co-owned by BMJ to the co-owners of the Journal, to publish the Work in this journal and any other BMJ products and to exploit all rights, as set out in our [licence](#).

The Submitting Author accepts and understands that any supply made under these terms is made by BMJ to the Submitting Author unless you are acting as an employee on behalf of your employer or a postgraduate student of an affiliated institution which is paying any applicable article publishing charge ("APC") for Open Access articles. Where the Submitting Author wishes to make the Work available on an Open Access basis (and intends to pay the relevant APC), the terms of reuse of such Open Access shall be governed by a Creative Commons licence – details of these licences and which [Creative Commons](#) licence will apply to this Work are set out in our licence referred to above.

Other than as permitted in any relevant BMJ Author's Self Archiving Policies, I confirm this Work has not been accepted for publication elsewhere, is not being considered for publication elsewhere and does not duplicate material already published. I confirm all authors consent to publication of this Work and authorise the granting of this licence.

MainDocumentV3.0\_UNFormatted\_18052022

### **Title**

Barriers and facilitators to implementation of non-medical independent prescribing in primary care in the United Kingdom: a qualitative systematic review.

### **Corresponding author**

Judith Edwards

University of Surrey Faculty of Health and Medical Sciences, School of Health Sciences  
Guildford, Surrey, United Kingdom, GU2 7YH.

[j.a.edwards@surrey.ac.uk](mailto:j.a.edwards@surrey.ac.uk)

<https://orcid.org/0000-0002-6531-1315>

### **Co-authors**

Professor Melaine Coward

University of Surrey Faculty of Health and Medical Sciences, School of Health Sciences  
Guildford, Surrey, United Kingdom, GU2 7YH.

[m.coward@surrey.ac.uk](mailto:m.coward@surrey.ac.uk)

Dr Nicola Carey

University of the Highlands and Islands, Department of Nursing and Midwifery, Inverness,  
IV2 3JH

[nicola.carey@uhi.ac.uk](mailto:nicola.carey@uhi.ac.uk)

(Formerly: University of Surrey Faculty of Health and Medical Sciences, School of Health  
Sciences, Guildford, Surrey, United Kingdom, GU2 7YH.

[n.carey@surrey.ac.uk](mailto:n.carey@surrey.ac.uk))

**Word count: 5743**



MainDocumentV3.0\_UNFormatted\_18052022

## **Abstract (293 words)**

### **Objectives**

To support workforce deficits and rising demand for medicines, independent prescribing (IP) by nurses, pharmacists and allied health professionals is a key component of workforce transformation in UK healthcare. This systematic review of qualitative research studies used a thematic synthesis approach to explore stakeholders' views on IP in primary care and identify barriers and facilitators influencing implementation.

### **Setting**

UK primary/community care.

### **Participants**

Inclusion criteria were UK qualitative studies of any design, published in the English language. Six electronic databases were searched between January 2010 and September 2021, supplemented by reference list searching. Papers were screened, selected and quality-appraised using the Quality Assessment Tool for Studies with Diverse Designs. Study data were extracted to a bespoke table and two reviewers used NVivo software to code study findings. An inductive thematic synthesis was undertaken to identify descriptive themes and interpret these into higher order analytical themes. The Diffusion of Innovations and Consolidated Framework for Implementation Research were guiding theoretical anchors.

**Primary and secondary outcome measures:** N/A.

### **Results**

Twenty-three articles addressing nurse, pharmacist and physiotherapist IP were included. Synthesis identified barriers and facilitators in four key stages of implementation: 1) "Preparation", 2) "Training", 3) "Transition" and 4) "Sustainment". Enhancement, substitution, and role specific implementation models reflected three main ways that the IP role was used in primary care.

### **Conclusions**

In order to address global deficits, there is increasing need to optimise use of IP capability. Although the number of independent prescribers continues to grow, numerous barriers to implementation persist. A more coordinated and targeted approach is key to overcoming barriers identified in the four stages of implementation and would help ensure that IP is recognised as an effective approach to help alleviate workforce shortfalls in the UK, and around the world. PROSPERO registration number CRD42019124400.

MainDocumentV3.0\_UNFormatted\_18052022

## Article Summary

### Strengths and limitations of this study

- Adopting a qualitative synthesis facilitated contextual understanding into the implementation of non-medical independent prescribing (IP) in primary care settings in the UK.
- Higher order analytical themes were identified that offer in-depth interpretation of non-medical IP implementation in UK primary care.
- The theoretical lens improved understanding of the generalisability of factors known to facilitate non-medical IP in UK primary care.
- Grey literature was excluded from the synthesis.

### Key words

Implementation, barriers, facilitators, non-medical prescribing, independent prescribing, primary care, meta-synthesis

MainDocumentV3.0\_UNFormatted\_18052022

## Introduction

Equitable access to primary care improves health outcomes, lowers costs and enhances patient experience<sup>(1, 2)</sup>. Global workforce deficits<sup>(3-5)</sup> and the rising prevalence of long-term conditions<sup>(6, 7)</sup>, multimorbidity<sup>(8-10)</sup> and COVID-19<sup>(11)</sup> have severely threatened primary care sustainability<sup>(12-15)</sup>. Medicines use in global priorities including diabetes and cardiovascular diseases is increasing, with worldwide drug therapy days rising in 2019 to 1.8 trillion and an average of 234 days per person/year<sup>(16)</sup>. With one in four adults in United Kingdom (UK) primary care taking five or more medicines daily<sup>(17)</sup>, the workforce implications for meeting prescribing needs are profound.

Mobilising primary care to improve workforce and service sustainability is a global challenge<sup>(5, 18)</sup>. As in other countries<sup>(19, 20)</sup>, primary care in the four devolved UK nations (i.e., England, Scotland, Wales, Northern Ireland) has undergone significant restructuring and reorganisation<sup>(21-24)</sup>. In England, for example, the 2019 NHS long-term plan amalgamated GP practices into primary care networks (PCN), covering populations of 30-50,000<sup>(25)</sup>. Pooling resources to achieve government targets<sup>(26)</sup> with the promise of extra non-medical staff (e.g., advanced/specialist clinical pharmacists, dieticians, paramedics and physiotherapists), PCNs were expected to offer additional hours within broader service options<sup>(27)</sup>. While the impact of the new 2021/22 Health and Care Bill on primary care workforce transformation in England remains uncertain<sup>(28)</sup>, the diverse skills of the non-medical advanced practice workforce including prescribing capability are likely to remain important for addressing UK primary care prescribing and medicines optimisation needs<sup>(29-31)</sup>.

In line with global movements to enhance the skills of non-medical healthcare professionals, over 90,000 UK nurses, pharmacists, optometrists, radiographers, physiotherapists, podiatrists, dieticians and paramedics<sup>(32)</sup> under serial legislative changes<sup>(33-36)</sup> and with accredited additional training<sup>(37-39)</sup> are authorised to prescribe using supplementary and/or independent forms. Although UK legislation restricts dieticians and diagnostic radiographers to supplementary prescribing, as reported by professions with dual supplementary/IP rights (e.g., nurses, pharmacists, physiotherapists, podiatrists) IP is more workable<sup>(40, 41)</sup> and has largely superseded supplementary prescribing in many UK non-doctor led primary and community care services<sup>(42-44)</sup>. Enabling the autonomous initial assessment and on-going management of patient prescribing and medicines optimisation needs, IP increases practitioner autonomy/expertise<sup>(29, 45-47)</sup>, enhances clinical outcomes compared to doctor-led care<sup>(29)</sup> and results in high service-user satisfaction<sup>(48)</sup>. Across contemporary primary care

MainDocumentV3.0\_UNFormatted\_18052022

1  
2  
3 settings in the UK and internationally IP is an increasingly essential component of service re-  
4 design<sup>(45, 49-54)</sup>.

5  
6  
7  
8 Despite its many benefits, the UK adoption rates for IP vary<sup>(55, 56)</sup>, with medical opposition to  
9 prescribing roles<sup>(57, 58)</sup>, training course drop-out<sup>(46)</sup>, delayed prescribing onset<sup>(59, 60)</sup> and role  
10 underuse reported<sup>(61-64)</sup>. Difficulties with implementation are frequently cited<sup>(43, 46, 59, 65-67)</sup>.  
11 Several UK<sup>(68, 69)</sup> and international systematic<sup>(54, 70-72)</sup> and literature reviews,<sup>(73, 74)</sup> have  
12 focused on implementation barriers and/or facilitators. However, these have been  
13 profession-specific<sup>(54, 70-72, 74)</sup>, have included international models with varying  
14 legislative/jurisdictional levels of prescribing autonomy<sup>(54, 70-72)</sup> and/or have addressed  
15 prescribing in heterogenous care settings<sup>(54, 68, 69, 74)</sup>. None have synthesised qualitative  
16 studies in all IP eligible professions in UK primary care. Considering IP enhances workforce  
17 skills and builds capacity for service redesign and improved sustainability<sup>(42, 75-77)</sup>, identifying  
18 and understanding the challenges to its implementation is ever pressing<sup>(78, 79)</sup>.

## 25 26 27 **Aim**

28 This qualitative meta-synthesis aimed to identify barriers and facilitators that influence  
29 implementation of IP in UK primary care.  
30  
31

## 32 33 **Theoretical perspective**

34 This review is broadly informed by the Diffusion of Innovations theory<sup>(80, 81)</sup> and the  
35 Consolidated Framework for Implementation Research<sup>(82, 83)</sup> which provided theoretical  
36 anchors for identifying contextual factors likely to influence implementation<sup>(84-89)</sup>.  
37  
38  
39  
40

## 41 42 **Methods**

43 This qualitative meta-synthesis is reported following the Enhancing transparency in reporting  
44 the synthesis of qualitative research (ENTREQ) guidelines<sup>(90)</sup> which incorporates elements of  
45 the Preferred Reporting Items for Systematic Reviews and Meta-Analyses (PRISMA)  
46 statement<sup>(91)</sup>. Thematic qualitative meta-synthesis<sup>(92, 93)</sup> permits synthesis of context-  
47 embodied research and is a suitable method for identifying factors influencing  
48 implementation<sup>(94-96)</sup>. The review was registered in PROSPERO (CRD42019124400)<sup>(97)</sup>.  
49  
50  
51  
52  
53

## 54 55 **Search strategy**

56 A systematic search of UK literature on primary and community care IP was undertaken in  
57 January 2021 and updated in September 2021. Barriers/facilitators to healthcare innovations  
58 are conceptually well established<sup>(98-102)</sup> and thus grey literature was excluded. Search terms  
59  
60

MainDocumentV3.0\_UNFormatted\_18052022

were developed according to the Sample, Phenomenon of Interest, Design, Evaluation, Research Type (SPIDER) tool<sup>(103)</sup> and tested based on truncations of words related to prescribing, community/primary care and UK non-medical healthcare professions with IP authority (e.g., nurses, pharmacists, optometrists, physiotherapists, podiatrists, paramedics and radiographers). Wild card and Boolean Search Operators were used. Qualitative search terms were not included<sup>(104, 105)</sup>; all citations were screened for qualitative methodology. Search strings (see supplementary file 1 examples) were adapted for 6 electronic databases (EBSCO - MEDLINE, CINAHL, OVID – EMBASE, ProQuest - British Nursing Index, Nursing & Allied Health, Web of Science). The 2010 inception search date reflected major UK coalition governmental change and the introduction of landmark legislative reforms<sup>(106-109)</sup> that decentralised UK primary/community care commissioning<sup>(110)</sup>. Inclusion criteria applied to study selection are shown in Table 1. Retrieved citations were downloaded to EndNote V.X9 and duplicates removed.

**Table 1 Inclusion and exclusion criteria**

| Inclusion Criteria                                                                                                                              | Exclusion Criteria                                                                            |
|-------------------------------------------------------------------------------------------------------------------------------------------------|-----------------------------------------------------------------------------------------------|
| ▶ Primary research conducted in the UK (England, Scotland, Northern Ireland and/or Wales)                                                       | ▶ International/UK literature reviews, meta-analyses or meta-synthesis and/or grey literature |
| ▶ Studies employing participatory and/or non-participatory data collection methods within any qualitative, quantitative or mixed methods design | ▶ Quantitative studies not employing qualitative data collection methods                      |
| ▶ Studies addressing IP by legislated non-doctor healthcare professionals                                                                       | ▶ Studies addressing supplementary, dependent and/or collaborative models of prescribing      |
| ▶ Studies addressing primary/ community care IP                                                                                                 | ▶ Studies addressing secondary care and/or mixed primary and secondary care IP                |
| ▶ Studies presenting empirical evidence of barriers and/or facilitators to IP implementation                                                    |                                                                                               |
| ▶ Studies addressing non-context specific educational programmes for non-medical IP                                                             |                                                                                               |
| ▶ Peer reviewed, full text articles published between 01 January 2010 and 30 September 2021 in the English language                             |                                                                                               |

### Screening and eligibility

Two reviewers (JE, NC) independently assessed all titles and abstracts against the inclusion criteria and the full-text versions of papers deemed potentially relevant were obtained and reviewed. Papers found not to meet the criteria during screening were excluded with

MainDocumentV3.0\_UNFormatted\_18052022

1  
2  
3 reasons recorded as shown in the Preferred Reporting Items for Systematic Reviews and  
4 Meta-Analyses (PRISMA) table (Figure 1). Reference list hand searching supplemented  
5 database searching.  
6  
7  
8  
9

### 10 **Figure 1 goes here**

11  
12  
13 **Figure 1.** Preferred Reporting Items for Systematic Reviews and Meta-Analyses depicting  
14 study selection, screening, eligibility for inclusion and synthesis (adapted from Page et al  
15 2021)<sup>(91)</sup>.  
16  
17

### 18 **Quality assessment**

19  
20 In keeping with the scope of a qualitative meta-synthesis<sup>(111, 112)</sup>, studies were not excluded  
21 on the basis of quality assessment<sup>(92, 113)</sup>. Methodological appraisal of individual papers was  
22 undertaken using the Quality Assessment Tool for Studies with Diverse Designs  
23 (QATSDD)<sup>(114)</sup>, which has demonstrated validity and test-retest reliability for assessing the  
24 reporting and methodological transparency of diverse study designs<sup>(115)</sup>. The tool uses a 4-  
25 point scoring system for assessment of qualitative studies (14 questions) and mixed  
26 methods studies (16 questions), resulting in total possible scores of 42 and 48 respectively  
27 <sup>(114)</sup>. Scoring was undertaken by one reviewer (JE) and any uncertainties were discussed  
28 and resolved with a second reviewer (NC). Supplementary file 2 provides a detailed  
29 breakdown of questions and the grading of study manuscripts.  
30  
31  
32  
33  
34  
35  
36  
37  
38

### 39 **Data extraction**

40 Study data were extracted by one author (JE) to a bespoke table adapted from  
41 recommended templates<sup>(116)</sup>. This collated contextual and methodological information, data  
42 on barriers and/or facilitators and main findings and was piloted on 5 index studies to ensure  
43 consistency and usability. Data extraction was recursive and involved repeated  
44 review/update between ensuing analysis stages<sup>(117)</sup>.  
45  
46  
47  
48

### 49 **Data analysis and synthesis**

50  
51 The aim of thematic analysis was to develop a coherent synthesis of barriers and facilitators  
52 that influenced IP across stages of the implementation continuum<sup>(118-120)</sup>. Data analysis  
53 followed a four stage, iterative process described by Thomas and Harden (2008)<sup>(121)</sup> (Table  
54 2). Qualitative “data” referred to participant quotations, (sub)themes, explanations,  
55 hypotheses or new theory, observational excerpts and author interpretations<sup>(122)</sup>. Barriers  
56 were defined as “any obstacle (material or immaterial) impeding adoption, implementation  
57  
58  
59  
60

MainDocumentV3.0\_UNFormatted\_18052022

and/or sustainability of IP<sup>(123, 124)</sup> and facilitators were defined as “any obstacle (material or immaterial) enhancing adoption, implementation and/or sustainability of IP<sup>(123, 124)</sup>”.

**Table 2 Stages of analysis**

|         |                                                                                                                                                                                                                                               |
|---------|-----------------------------------------------------------------------------------------------------------------------------------------------------------------------------------------------------------------------------------------------|
| Stage 1 | In-depth reading and familiarisation with individual papers, data extraction                                                                                                                                                                  |
| Stage 2 | Inductive line-by-line coding of highest quality, index papers (n=5) to develop a set of “open codes” by two independent reviewers (JE, NC).                                                                                                  |
| Stage 3 | Codes discussed/agreed, grouped into descriptive themes using NVivo <sup>(125)</sup> ; codebook applied to all papers, and expanded/modified by identifying new codes/themes and/or merging/renaming existing codes/themes <sup>(126)</sup> . |
| Stage 4 | Descriptive themes organised into higher order analytical themes and matrix charted with corresponding indicative quotes                                                                                                                      |

### Rigour within the analytical process

To ensure analytic rigour, two independent reviewers (JE, NC) initially performed inductive line-by-line data coding from 5 highest quality index papers (stage 2). Each reviewer produced sets of open data codes which were compared and discussed. If different codes and/or different interpretations were assigned to a concept, these were discussed and revised. Disagreements were resolved by a third reviewer (MC). Data codes were subsequently grouped into descriptive themes, creating a codebook for application to all papers (stage 3). To identify possible contradictory cases and clarify thematic commonalities within studies<sup>(127)</sup>, a matrix of participant quotes was charted to constituent themes (see Supplementary file 3)<sup>(128)</sup>.

### Patient and public involvement

The review was conducted as part of a PhD exploring paramedic IP in UK primary care, for which a University service user/carers group was instrumental in informing study design and methods. However, as the systematic review focused on implementation challenges and not patient-related outcomes, the group was not involved its design or conduct.

### Results

Twenty-three of the 5,365 original articles identified met inclusion criteria<sup>(129-152)</sup> (see Figure 1. PRISMA table).

### Study characteristics and quality assessment

Table 3 summaries the study characteristics and quality assessment scores of included articles. Studies were undertaken in in England <sup>(131, 134, 135, 138, 140, 142, 143, 145, 148-152)</sup>, Scotland

MainDocumentV3.0\_UNFormatted\_18052022

(129, 130, 132, 141), or across devolved UK nations (133, 136, 137, 144, 146). The representation of independent prescribers from Wales (133, 136) and Northern Ireland (144, 146) was limited.

Sixteen studies used qualitative methods (129, 132, 133, 135, 137-142, 146-152), six used mixed methods (130, 131, 134, 136, 143, 144) and one employed a qualitative survey (145).

Fifteen studies addressed nurse IP(129-131, 134-136, 138-142, 145, 148, 150, 152), seven included pharmacists(132, 133, 137, 144, 146, 149, 151) and one study focused on physiotherapists(143). Where indicated, studies were conducted pre-2011(130, 131, 135, 139-141, 145, 149-151), between 2011-2015 (129, 132, 134, 136, 147, 148, 152) or between 2016-2019 (133, 137, 144, 146).

For peer review only



MainDocumentV3.0\_UNFormatted\_18052022

**Table 3. Characteristics of included studies (n=23) and key barriers and facilitators**

| Author(s), year          | Country, Setting                                                    | Study focus, Participants                                                                                                                          | Barriers                                     | Facilitators                                             | QATSDD score |
|--------------------------|---------------------------------------------------------------------|----------------------------------------------------------------------------------------------------------------------------------------------------|----------------------------------------------|----------------------------------------------------------|--------------|
| Afseth et al (2017)      | Scotland. HEI.                                                      | Views on prescribing training.<br>6 NIP trainees, 6 DMPs                                                                                           | 1, 2, 3                                      | 4, 5, 6, 7, 8                                            | 67%          |
| Boreham et al (2013)     | Scotland.                                                           | Views on prescribing training.<br>87 NIP trainees, 10 HEI leads.                                                                                   | 1, 2, 3, 8, 9                                | 4, 5, 9, 10, 11                                          | 67%          |
| Bowskill et al (2014)    | England. HEI.                                                       | Views on prescribing training<br>6 IP trainees, 3 IPs (unspecified professions)                                                                    | 1, 3, 9                                      | 12                                                       | 60%          |
| Brodie et al (2014)      | Scotland. Gen-P, Comm.                                              | Views on prescribing role.<br>4 NIPs, 4 PIPs.                                                                                                      | 8, 13, 14, 15, 16, 17, 18, 19                | 9, 10, 20, 21, 22, 23, 24                                | 38%          |
| Carter et al (2021)      | England, Scotland, Wales.<br>Gen-P, Comm pharmacy.                  | Factors influencing prescribing and role of<br>practice pharmacists on evidence based<br>prescribing.<br>6 GPs, 6 NIPs, 6 PIPs, 12 key informants. | 25, 26, 27                                   | 9, 11, 24, 28, 29, 30, 31,<br>32, 61                     | 78%          |
| Cole & Gillett (2015)    | England. Comm pall care.                                            | Prescribing practices.<br>6 NIPs.                                                                                                                  | 2, 3, 15, 26, 27, 33, 34, 35, 36,<br>37, 38  | 21, 28, 30, 37, 61                                       | 29%          |
| Courtenay et al (2010)   | England. Gen-P, Comm<br>clinics.                                    | Patient experiences/views of nurse prescribing.<br>41 patients.                                                                                    |                                              | 10, 11, 22, 39                                           | 50%          |
| Courtenay et al (2017)   | England, Scotland, Wales.<br>Gen-P, Comm clinics.                   | Patient experiences/views of nurse and<br>pharmacist antibiotic prescribing for respiratory<br>tract infection.<br>16 NIPs, 1 PIP, 22 patients.    | 27                                           | 22, 23, 39, 40, 41                                       | 67%          |
| Courtenay et al (2019)   | UK (unspecified countries).<br>Gene-P, OOH, IC.                     | Factors influencing antibiotic prescribing for<br>respiratory tract infection.<br>17 NIPs, 4 PIPs.                                                 | 18, 27, 38, 42, 43                           | 6, 10, 11, 22, 23, 24, 28,<br>29, 32, 39, 40, 41, 44, 57 | 78%          |
| Cousins & Donnell (2012) | England. Gen-P.                                                     | Views on prescribing role.<br>6 NIPs.                                                                                                              | 3, 16, 18, 27, 34, 35, 37, 42, 45,           | 6, 9, 10, 20, 24, 28, 61                                 | 59%          |
| Daughtry et al (2010)    | England. Gen-P.                                                     | Experiences of prescribing role.<br>8 practice NIPs.                                                                                               | 3, 6, 18, 27, 29, 35, 62                     | 5, 8, 9, 10, 11, 24, 28, 29,<br>30, 44, 46, 47, 57, 61   | 36%          |
| Dhalivaal et al (2011)   | England. Gen-P.                                                     | Patient views on nurse prescribing.<br>15 patients.                                                                                                |                                              | 22, 39                                                   | 43%          |
| Downer & Shepherd (2010) | Scotland. Comm.                                                     | Views on prescribing role.<br>8 district NIPs.                                                                                                     | 3, 15, 17, 18, 35, 37, 38, 45, 48,<br>49, 62 | 3, 9, 10, 30, 44, 57, 61                                 | 48%          |
| Herklots et al (2015)    | England. Comm.                                                      | Experiences of prescribing.<br>7 community matron IPs.                                                                                             | 3, 15, 16, 18, 35, 38, 48, 49, 62            | 6, 7, 10, 11, 12, 22, 29,<br>47, 57, 61                  | 43%          |
| Holden et al (2019)      | England.                                                            | Medicines optimisation practices.<br>20 physio non-IPs, 1 physio-IP.                                                                               | 3, 13, 36, 42, 45, 50, 51                    | 10, 21                                                   | 75%          |
| Inch et al (2019)        | England, Scotland, Northern<br>Ireland.<br>Elderly residential care | Feasibility of implementation.<br>2 P non-IPs, 4 PIPs, 6 GPs, 16 care home staff,<br>2 patients, 3 relatives, 1 dietician non-IP.                  | 3, 49                                        | 10, 21, 22, 23, 52                                       | 54%          |

MainDocumentV3.0\_UNFormatted\_18052022

| Author(s), year             | Country, Setting                                                 | Study focus, Participants                                                                                          | Barriers                                              | Facilitators                                        | QATSDD score |
|-----------------------------|------------------------------------------------------------------|--------------------------------------------------------------------------------------------------------------------|-------------------------------------------------------|-----------------------------------------------------|--------------|
| Kelly et al (2010)          | England. Gen-P.                                                  | Barriers to adoption of IP.<br>31 practice NIPs, 120 N non-IPs.                                                    | 1, 2, 3, 9, 13, 35, 36, 42, 45, 50,<br>51, 53, 54, 55 |                                                     | 33%          |
| Lane et al (2020)           | England, Scotland, Northern Ireland.<br>Elderly residential care | Barriers and facilitators to prescribing.<br>27 P non-IPs, 29 GPs, 12 care home staff,<br>7 patients, 7 relatives. | 3, 35, 43, 48, 49                                     | 6, 7, 8, 10, 11, 21, 22, 39,<br>46, 52, 56          | 78%          |
| Latham & Nyatanga (2018a,b) | England. Comm pall care.                                         | Views on prescribing role.<br>6 NIPs.                                                                              | 3, 15, 18, 27, 35, 36, 38, 49, 50,<br>60              | 7, 8, 10, 11, 12, 20, 21,<br>22, 30, 44, 52, 57, 61 | 71%          |
| Maddox et al (2016)         | England. Gen-P, Comm, Nursing homes, Comm pharmacy.              | Barriers and facilitators to prescribing.<br>25 NIPs, 5 PIPs.                                                      | 3, 15, 16, 26, 27, 29, 35, 37, 42,<br>48, 62          | 6, 7, 10, 12, 24, 29, 30,<br>42, 47, 57, 61         | 71%          |
| Stenner et al (2011)        | England. Gen-P, Comm clinics.                                    | Patient views on nurse prescribing.<br>41 patients.                                                                |                                                       | 11, 22, 23, 29, 39                                  | 55%          |
| Weiss et al (2016)          | England. Gen-P.                                                  | Views on prescribing role.<br>7 NIPs, 7 PIPs, 7 GPs.                                                               | 3, 6, 17, 25, 35, 45, 49, 51, 56,<br>58, 59, 63       | 3, 6, 8, 11, 12, 22, 24, 29,<br>39, 44, 46, 47, 63  | 52%          |
| Williams et al (2018)       | England.<br>OOH/unscheduled care.                                | Factors influencing nurse and GP antibiotic prescribing for respiratory tract infection.<br>15 NIPs, 15 GPs.       | 15, 16, 18, 26, 27, 34, 49, 59                        | 6, 12, 22, 23, 24, 28, 32,<br>41                    | 76%          |

Comm – community, DMPs – designated medical practitioners, Gen-P – general practice, GPs – general practitioners, HEI – higher educational institute, IC – integrated care, NIP – nurse independent prescribers, N non-IPs – nurse non-prescribers, pall – palliative, physio-IP – physiotherapist independent prescriber, physio non-IPs – physiotherapist non-prescribers, PIPs – pharmacist independent prescribers, OOH – out of hours.

**Barriers:** 1=Lack of backfill/protected/study time, 2=Lack of DMP role clarity/supervision/availability, 3=Lack of medical/managerial support/leadership, 14=Lack of national IP incentives/policy initiatives, 15=Lack of clinical record/IT access, 16=Lack of CPD/supervision, 17=IP role isolation, 18=Time/workload constraints, 19=Lack of IP strategy, 25=Lack of inter-professional collaboration/communication networks, 26=Unclear/absent clinical protocols/guidelines, 27=Inappropriate patient/team pressure for prescribing, 33=Lack of local policies for IP, 34=Lack of governance/accountability structures, 35=Lack of team understanding of IP, 36=Lack of clinical/service advantage of IP, 37=Lack of peer support/mentoring, 38=Lack of prescribing confidence/competence, 42=Fear of responsibility/accountability/error, 43=Lack of practitioner specialist skills, 45=Lack of professional/personal adoption incentive, 48=Poor/absent physician relationships, 49=Lack of IP role clarity, 50=Expedient medicines pathways, 51=Prescribing considered outside professional practice scope, 53=Lack of course information, 54=Inconsistent selection policies, 55=Lack of workforce planning, 58=Formulary restrictions, 59=Lack of service user acceptance, 60=Delayed registration post qualification, 62=Lack of medical supervision, 63=Employment model

**Facilitators:** 4=DMP role clarity/good DMP supervision, 5=Inter-professional training model, 6=IP role clarity, 7=Established physician relationships, 8=Medical/managerial support/leadership, 9=Professional/personal adoption incentive, 10=Clinical/service advantage of IP, 11=Inter-professional collaboration/communication networks, 12=Peer support/mentoring, 13=Lack of course funding, 20=Prescribing integral to advanced practice, 21=Identified service pathways gaps, 22=Practitioner specialist skills, 23=Consultation time, 24=CPD/supervision, 28=Clinical/professional protocols/guidelines, 29=Prescribing confidence/competence, 30=Exposure to prescribing opportunity, 31=Adequate formulary, 32=National incentives/policy initiatives for prescribing, 39=Service user acceptance of IP, 40=Governance/accountability structures, 41=Audit/feedback on prescribing practice, 44=Good interprofessional relationships, 46=Stakeholder consultation, 47=Team understanding of IP, 52=Clinical record/IT access, 56=Employment model, 57=Medical supervision, 61=Delineated scope of prescribing competence

MainDocumentV3.0\_UNFormatted\_18052022

All studies reported results from primary care IP implementation; in general practice<sup>(138-140, 145)</sup>, community domiciliary/residential care<sup>(134, 141, 142, 144, 146, 148, 152)</sup> or mixed general practice/community settings<sup>(129-133, 135-137, 143, 149, 150)</sup>. Participants included nurse/pharmacist prescribers<sup>(132, 134, 136-139, 141, 142, 148, 149, 151, 152)</sup>, nurse/physiotherapist non-prescribers<sup>(143, 145)</sup>, nurse non-medical prescriber trainees and educational staff<sup>(129-131)</sup>, service-users<sup>(135, 136, 140, 150)</sup> and multi-disciplinary team members<sup>(144, 146, 151, 152)</sup>. Studies explored training<sup>(129-131)</sup>, IP roles<sup>(132, 138, 139, 141, 148, 151)</sup>, patient acceptance<sup>(135, 140, 150)</sup>, prescribing/medicines optimisation practices<sup>(133, 134, 136, 142, 143, 152)</sup>, implementation feasibility<sup>(144)</sup> and barriers and/or facilitators<sup>(137, 145, 146, 149)</sup>.

The methodological quality of included studies (see Table 3 summary) was average, with a QATSDD mean score 25 (range 13-36), mainly due to seven low scoring studies<sup>(132, 134, 139-142, 145)</sup>. Common methodological weaknesses were: lack of explicit theoretical framework<sup>(132, 134, 139, 140, 142, 145)</sup>, limited/absent rationale for choice of analytical methods<sup>(132, 134, 139-142, 145)</sup> and lack of reliability assessment for analytical processes<sup>(132, 134, 139-142, 145)</sup>. Methodological strengths of higher scoring studies were: statement of aims/objectives in main body of report<sup>(130, 133, 136, 137, 143, 147, 152)</sup>, description of data collection procedures<sup>(130, 133, 137, 143, 146, 147, 149)</sup> and fit between research question and method of analysis<sup>(130, 136, 137, 143, 146, 147, 149, 152)</sup>. Notably studies providing richer contextual descriptions<sup>(133, 137, 146, 148, 149, 152)</sup>, and/or using implementation theory<sup>(137, 146)</sup> explored barriers and/or facilitators in greater depth.

### **Identification of barriers and facilitators and key stages of implementation**

Implementation of IP in primary care was found to be complex and influenced by a myriad of organisational service, team and individual stakeholder level barriers and facilitators. Informed by descriptive/data themes, these fell into four major analytical themes, each of which is presented as a key stage in the implementation process as follows:

- 1) Analytical theme 1: Preparation – organisational readiness for implementation
- 2) Analytical theme 2: Training – optimising practitioner readiness for IP
- 3) Analytical theme 3: Transition – ensuring early prescribing support
- 4) Analytical theme 4: Sustainment – maximising and developing IP

Table 4 provides an overview of analytical themes, associated descriptive/data themes and summative findings. Examples of indicative quotations making up these themes are presented in Supplementary file 3. Factors presented within themes acted as barriers and/or facilitators to implementation, e.g., poor managerial support was a barrier, while proactive managerial support and leadership facilitated implementation. It is acknowledged that

MainDocumentV3.0\_UNFormatted\_18052022

1  
2  
3 barriers and facilitators overlap some themes and in some cases are interdependent. For  
4 example, lack of mentoring relationships with doctors limited opportunity for informal support,  
5 which in turn prevented prescribing competence development and risked loss of prescriber  
6 confidence<sup>(142, 149)</sup>. Therefore, to avoid duplication of findings, barriers and facilitators are  
7 presented within the themes deemed most appropriate, yet their presence and influence is  
8 acknowledged elsewhere. Given that the majority of data were derived from studies  
9 conducted in England or mixed geographical settings, it was not possible to deduce  
10 differences in barriers and facilitators across the devolved UK nations.  
11  
12  
13  
14  
15  
16  
17  
18  
19  
20  
21  
22  
23  
24  
25  
26  
27  
28  
29  
30  
31  
32  
33  
34  
35  
36  
37  
38  
39  
40  
41  
42  
43  
44  
45  
46  
47  
48  
49  
50  
51  
52  
53  
54  
55  
56  
57  
58  
59  
60

For peer review only

MainDocumentV3.0\_UNFormatted\_18052022

**Table 4. Analytical themes and sub-themes from included studies, with summative findings**

| Analytical Theme                                                                             | Descriptive Theme                                                 | Data theme                                                   | Summative findings                                                                                                                                                                                                                                                                                                                                                                                                                                                                                                                                                                                                                                                                                                                                                                                                                                                                                                                                                                                                                                                                                                                                                                                                                                                   |
|----------------------------------------------------------------------------------------------|-------------------------------------------------------------------|--------------------------------------------------------------|----------------------------------------------------------------------------------------------------------------------------------------------------------------------------------------------------------------------------------------------------------------------------------------------------------------------------------------------------------------------------------------------------------------------------------------------------------------------------------------------------------------------------------------------------------------------------------------------------------------------------------------------------------------------------------------------------------------------------------------------------------------------------------------------------------------------------------------------------------------------------------------------------------------------------------------------------------------------------------------------------------------------------------------------------------------------------------------------------------------------------------------------------------------------------------------------------------------------------------------------------------------------|
| Analytical theme 1: Preparation – organisational readiness for implementation                | Theme 1.1: Clarifying need & advantage of independent prescribing | Clarifying clinical/service need for independent prescribing | <ul style="list-style-type: none"> <li>Establishing a clear service/clinical need for IP<sup>(130, 135, 137-139, 141, 149)</sup> and identifying existing gaps in medicines pathways was a key requisite and facilitator for adoption<sup>(132, 134, 143, 144, 146, 148)</sup>.</li> <li>Team clarity on the need for adoption cemented IP role intentions and avoided role dissonance following implementation<sup>(139, 142, 144, 146, 149, 151)</sup>.</li> <li>Managerial leadership/support for IP was essential for ensuring initial and on-going infrastructural, funding and other implementation support needs<sup>(129-132, 134, 138, 139, 141-144, 146, 148, 151)</sup>.</li> <li>Trusting interprofessional relationships, collaboration/team-working built confidence in IP and facilitated team support for implementation<sup>(129, 130, 133, 135, 137, 139, 141, 142, 146, 148, 149, 151)</sup>.</li> </ul>                                                                                                                                                                                                                                                                                                                                          |
|                                                                                              |                                                                   | Establishing service pathway gaps                            |                                                                                                                                                                                                                                                                                                                                                                                                                                                                                                                                                                                                                                                                                                                                                                                                                                                                                                                                                                                                                                                                                                                                                                                                                                                                      |
|                                                                                              | Role clarity                                                      |                                                              |                                                                                                                                                                                                                                                                                                                                                                                                                                                                                                                                                                                                                                                                                                                                                                                                                                                                                                                                                                                                                                                                                                                                                                                                                                                                      |
| Analytical theme 2: Training – optimising practitioner readiness for independent prescribing | Theme 1.2: Managerial leadership and support                      | Role of managers                                             | <ul style="list-style-type: none"> <li>Adoption was impeded by inconsistent candidate selection policies and lack of workforce planning<sup>(143, 145)</sup>. Individual practitioner expectation of professional/personal benefit remained a key driver for IP adoption<sup>(130, 132, 133, 138, 139, 141)</sup>.</li> <li>Skills requisite to IP (e.g., physical assessment and communication skills) were important factors influencing service user and team acceptance of IP<sup>(135, 136, 140, 144, 146, 148, 150-152)</sup>.</li> <li>Motivational barriers (e.g., lack of remuneration, fear of litigation and competing professional or personal commitments) disincentivised training uptake<sup>(138, 143, 145)</sup>.</li> <li>Lack of information on NMP training and support for managing competing work, personal/academic commitments negatively influenced student learning experiences<sup>(129-131, 145, 148)</sup>.</li> <li>Standardised allocation of study leave/backfill/protected time and prepared practice mentors were essential to support learning<sup>(129-131, 134)</sup>.</li> <li>Additional training buddying schemes helped students better manage the competing demands of training whilst working<sup>(131)</sup>.</li> </ul> |
|                                                                                              |                                                                   | Recognising value                                            |                                                                                                                                                                                                                                                                                                                                                                                                                                                                                                                                                                                                                                                                                                                                                                                                                                                                                                                                                                                                                                                                                                                                                                                                                                                                      |
|                                                                                              |                                                                   | Culture                                                      |                                                                                                                                                                                                                                                                                                                                                                                                                                                                                                                                                                                                                                                                                                                                                                                                                                                                                                                                                                                                                                                                                                                                                                                                                                                                      |
| Analytical theme 3: Transition – ensuring early prescribing support                          | Theme 1.3: Inter-professional environment                         | Inter-professional relationships                             | <ul style="list-style-type: none"> <li>Transition was a point of high vulnerability for new prescribers with an initial lack of confidence often under-recognised by teams<sup>(137, 139, 141, 142, 148, 149)</sup>.</li> <li>Delineating a minimum scope of practice by restricting formulary and/or using guidelines/protocols facilitated early growth of competence and confidence<sup>(138, 139, 141, 142, 149, 151)</sup>.</li> <li>Early exposure to prescribing opportunity, time and structured support systems with medical supervision were essential in transition<sup>(129, 132-134, 136-139, 141, 148, 149)</sup>.</li> </ul>                                                                                                                                                                                                                                                                                                                                                                                                                                                                                                                                                                                                                          |
|                                                                                              |                                                                   | Communication & collaboration                                |                                                                                                                                                                                                                                                                                                                                                                                                                                                                                                                                                                                                                                                                                                                                                                                                                                                                                                                                                                                                                                                                                                                                                                                                                                                                      |
|                                                                                              |                                                                   | Selection                                                    |                                                                                                                                                                                                                                                                                                                                                                                                                                                                                                                                                                                                                                                                                                                                                                                                                                                                                                                                                                                                                                                                                                                                                                                                                                                                      |
| Analytical theme 4: Sustainment – maximising and developing independent prescribing          | Theme 2.1: Selecting the right practitioners                      | Skills & aptitudes                                           | <ul style="list-style-type: none"> <li>IP could increase workload and imposed time constraints<sup>(132, 137-139, 141, 142, 148, 152)</sup>. Role underuse was a risk in community settings if infrastructural requisites (e.g., electronic prescribing/IT clinical record access) failed to be implemented<sup>(132, 134, 141, 142, 148, 149)</sup>.</li> <li>IP for service redesign and sustainability was facilitated by competence development, CPD opportunity and medical/managerial leadership<sup>(132, 133, 136, 139, 141, 142, 144, 146, 148, 149, 151, 152)</sup>.</li> <li>CPD provision and formal evaluation of IP implementation was inconsistent and lacked</li> </ul>                                                                                                                                                                                                                                                                                                                                                                                                                                                                                                                                                                              |
|                                                                                              |                                                                   | Motivation & commitment                                      |                                                                                                                                                                                                                                                                                                                                                                                                                                                                                                                                                                                                                                                                                                                                                                                                                                                                                                                                                                                                                                                                                                                                                                                                                                                                      |
|                                                                                              |                                                                   | Expectations of training                                     |                                                                                                                                                                                                                                                                                                                                                                                                                                                                                                                                                                                                                                                                                                                                                                                                                                                                                                                                                                                                                                                                                                                                                                                                                                                                      |
|                                                                                              | Theme 2.2: Preparing and supporting practitioners during training | Study leave                                                  |                                                                                                                                                                                                                                                                                                                                                                                                                                                                                                                                                                                                                                                                                                                                                                                                                                                                                                                                                                                                                                                                                                                                                                                                                                                                      |
|                                                                                              |                                                                   | Designated Medical Practitioners                             |                                                                                                                                                                                                                                                                                                                                                                                                                                                                                                                                                                                                                                                                                                                                                                                                                                                                                                                                                                                                                                                                                                                                                                                                                                                                      |
|                                                                                              |                                                                   | Self-confidence                                              |                                                                                                                                                                                                                                                                                                                                                                                                                                                                                                                                                                                                                                                                                                                                                                                                                                                                                                                                                                                                                                                                                                                                                                                                                                                                      |
| Analytical theme 3: Transition – ensuring early prescribing support                          | Theme 3.1: Transition as a point of vulnerability                 | Minimum competence                                           |                                                                                                                                                                                                                                                                                                                                                                                                                                                                                                                                                                                                                                                                                                                                                                                                                                                                                                                                                                                                                                                                                                                                                                                                                                                                      |
|                                                                                              |                                                                   | Experience & exposure                                        |                                                                                                                                                                                                                                                                                                                                                                                                                                                                                                                                                                                                                                                                                                                                                                                                                                                                                                                                                                                                                                                                                                                                                                                                                                                                      |
|                                                                                              | Theme 3.2: Nurturing confidence & competence                      | Informal & formal support systems                            |                                                                                                                                                                                                                                                                                                                                                                                                                                                                                                                                                                                                                                                                                                                                                                                                                                                                                                                                                                                                                                                                                                                                                                                                                                                                      |
| Analytical theme 4: Sustainment – maximising and developing independent prescribing          | Theme 3.3: Transition support needs                               | Impact on workload                                           |                                                                                                                                                                                                                                                                                                                                                                                                                                                                                                                                                                                                                                                                                                                                                                                                                                                                                                                                                                                                                                                                                                                                                                                                                                                                      |
|                                                                                              |                                                                   | Role/service expansion                                       |                                                                                                                                                                                                                                                                                                                                                                                                                                                                                                                                                                                                                                                                                                                                                                                                                                                                                                                                                                                                                                                                                                                                                                                                                                                                      |
|                                                                                              |                                                                   | Continued professional development                           |                                                                                                                                                                                                                                                                                                                                                                                                                                                                                                                                                                                                                                                                                                                                                                                                                                                                                                                                                                                                                                                                                                                                                                                                                                                                      |
| Analytical theme 4: Sustainment – maximising and developing independent prescribing          | Theme 4.1: Service delivery                                       | Evaluation & Reflection                                      |                                                                                                                                                                                                                                                                                                                                                                                                                                                                                                                                                                                                                                                                                                                                                                                                                                                                                                                                                                                                                                                                                                                                                                                                                                                                      |
|                                                                                              |                                                                   | Role/service expansion                                       |                                                                                                                                                                                                                                                                                                                                                                                                                                                                                                                                                                                                                                                                                                                                                                                                                                                                                                                                                                                                                                                                                                                                                                                                                                                                      |
|                                                                                              |                                                                   | Continued professional development                           |                                                                                                                                                                                                                                                                                                                                                                                                                                                                                                                                                                                                                                                                                                                                                                                                                                                                                                                                                                                                                                                                                                                                                                                                                                                                      |
| Analytical theme 4: Sustainment – maximising and developing independent prescribing          | Theme 4.2: Supporting role development                            | Evaluation & Reflection                                      |                                                                                                                                                                                                                                                                                                                                                                                                                                                                                                                                                                                                                                                                                                                                                                                                                                                                                                                                                                                                                                                                                                                                                                                                                                                                      |
|                                                                                              |                                                                   | Role/service expansion                                       |                                                                                                                                                                                                                                                                                                                                                                                                                                                                                                                                                                                                                                                                                                                                                                                                                                                                                                                                                                                                                                                                                                                                                                                                                                                                      |
|                                                                                              |                                                                   | Continued professional development                           |                                                                                                                                                                                                                                                                                                                                                                                                                                                                                                                                                                                                                                                                                                                                                                                                                                                                                                                                                                                                                                                                                                                                                                                                                                                                      |

MainDocumentV3.0\_UNFormatted\_18052022

|  |  |  |                                                                                                                                                                                                                                                                                                                                                                                                 |
|--|--|--|-------------------------------------------------------------------------------------------------------------------------------------------------------------------------------------------------------------------------------------------------------------------------------------------------------------------------------------------------------------------------------------------------|
|  |  |  | standardisation in primary care <sup>(132, 138, 142, 149, 152)</sup> . <ul style="list-style-type: none"><li>• 'Enhancement', 'substitution', and 'role specific' implementation models based on the maintenance or change in prescribing competence, service reconfiguration and/or substitution of services were identified<sup>(132, 139, 141, 142, 144, 146, 148, 149, 151)</sup></li></ul> |
|--|--|--|-------------------------------------------------------------------------------------------------------------------------------------------------------------------------------------------------------------------------------------------------------------------------------------------------------------------------------------------------------------------------------------------------|

CPD – continued professional development, DMPs – designated medical practitioners, GPs – general practitioners, IP – independent prescribing, IPs – independent prescribers, NMP – non-medical prescribing

For peer review only

MainDocumentV3.0\_UNFormatted\_18052022

### **Analytical theme 1: Preparation – organisational readiness for implementation**

This analytical theme refers to barriers and facilitators influential to the planning phase of implementation which related to the service need and relative advantage of implementing IP, the need for consistent managerial leadership and an inter-professional environment that was conducive to team implementation.

#### **Descriptive Theme 1.1: Clarifying need and advantage of implementing independent prescribing**

Identifying shortfalls in existing medicines pathways and how IP could fill service gaps were key steps in this stage. Studies described a highly qualified, specialist nursing and pharmacy workforce delivering unscheduled, scheduled and out-of-hours services<sup>(132, 134-139, 141, 142, 144, 146, 148, 150-152)</sup> who routinely made autonomous clinical decisions necessitating prescribing and medicines optimisation skills<sup>(129, 135-137, 142, 148, 150, 152)</sup>. IP held tangible advantage over former methods of accessing prescribed medicines which involved request, referral and/or the counter-signing of prescriptions by doctors. Subject to GP workload<sup>(134, 144, 146)</sup> and constrained availability<sup>(142, 144, 146, 148)</sup>, these methods were labour intensive<sup>(142-144, 146, 148)</sup>, inefficient<sup>(138, 142, 143, 148)</sup>, and burdened services and patients through the need for additional healthcare contacts<sup>(135, 139, 141, 143, 144, 148, 150)</sup>. By removing the need for doctor input, IP improved responsiveness with respect to medicines<sup>(135, 137, 141, 142, 144, 146, 148, 150)</sup>, enhanced care quality<sup>(132, 144, 148)</sup>, and helped prevent adverse outcomes<sup>(142)</sup>.

Lack of team clarity and transparency on IP role intentions were persistent barriers to implementation<sup>(139, 141, 142, 144, 146, 148, 149, 151)</sup>. Poor team understanding of IP could limit integration<sup>(151)</sup>, and promote role ambiguity<sup>(151)</sup> or misuse<sup>(132, 138, 142, 149)</sup>. Consultative team stakeholder processes facilitated clarification of current medicines pathways bottle necks<sup>(146)</sup>, helped cement clinical advantage of IP<sup>(146)</sup> and encouraged a collective understanding of implementation<sup>(144, 146, 151)</sup>. Conversely, if existing medicines pathways were perceived to be expedient and IP held limited advantage, adoption was less likely<sup>(143, 145)</sup>.

#### **Descriptive Theme 1.2: Managerial leadership and support**

Lack of managerial leadership and support were highly cited barriers to implementation that persisted across the review decade. Nurse/pharmacist prescribers reported stage specific and on-going funding<sup>(130, 143, 145)</sup>, training<sup>(131, 132, 134, 138, 139, 141, 142, 149)</sup> and infrastructural needs<sup>(132, 134, 141, 142, 148, 149)</sup> that extended across the IP implementation trajectory. Managerial support was, however, frequently reported to diminish post-adoption<sup>(130-132, 134, 138, 139, 141-143, 145, 148, 149)</sup> and many practitioners believed managers lacked knowledge about IP<sup>(132, 138, 139, 143, 145)</sup> or misunderstood its potential for improving service quality<sup>(132, 145)</sup>. Nurses/pharmacists

MainDocumentV3.0\_UNFormatted\_18052022

1  
2  
3 ascribed high value to IP for improving service efficiency<sup>(137, 138, 141, 142, 148, 149)</sup> and skill  
4 utilisation<sup>(132, 134, 138, 142)</sup>, perceiving it extended clinical knowledge beyond prescribing<sup>(132, 134,</sup>  
5 <sup>142, 148)</sup>, enhanced clinical confidence<sup>(132, 139, 141, 142, 148)</sup> and job satisfaction<sup>(138, 141, 148)</sup>, and  
6 facilitated team education<sup>(132, 144, 151)</sup>. They perceived themselves a unique workforce  
7 resource with potential for better mobilisation in under-resourced areas (e.g., mental  
8 health)<sup>(132)</sup>. However, there was a perception that management lacked appreciation of  
9 primary care workforce aspirations for IP<sup>(145)</sup> and overlooked its scope<sup>(132, 143, 145)</sup>. Better  
10 recognition and commitment were considered essential for leveraging and driving IP  
11 services forward<sup>(132)</sup>.  
12  
13  
14  
15  
16  
17  
18

19 Ensuring teams understood IP and its role within care delivery mitigated subsequent  
20 barriers<sup>(138, 139, 142, 151)</sup> and was critical for implementation success<sup>(139, 141, 142, 144, 146, 148, 149, 151)</sup>.  
21 Doctors, receptionists<sup>(138, 139, 151)</sup>, dispensing pharmacists<sup>(148, 151)</sup>, and peer colleagues<sup>(141, 148,</sup>  
22 <sup>149, 151)</sup> all played supervisory and/or infrastructural roles in IP implementation and  
23 understanding the need for this input was essential. While staff clarity on their roles in  
24 relation to IP positively influenced willingness to provide enabling supports such as clinic  
25 administration<sup>(138, 151)</sup>, record access<sup>(146)</sup>, and clinical supervision/pharmaceutical advice<sup>(142,</sup>  
26 <sup>148)</sup> lack of team understanding of IP was a barrier that was cited repeatedly across the  
27 review decade<sup>(134, 138, 139, 141, 142, 145, 146, 148, 149, 151)</sup>.  
28  
29  
30  
31  
32  
33

### 34 **Descriptive Theme 1.3: Inter-professional environment**

35 Respectful, trusting inter-professional relationships promoted an appreciation of different  
36 professional skill sets<sup>(151)</sup>, helped ratify the purpose of IP<sup>(129, 151)</sup> and built team confidence in  
37 the prescribing competence of nurses and pharmacists<sup>(129, 142)</sup>. Good relationships facilitated  
38 information transfer<sup>(142)</sup>, promoted supervision provision<sup>(149, 151)</sup>, shared learning<sup>(129)</sup> and team  
39 working<sup>(151)</sup>. Acceptance and positive attitudes towards IP as a shared skill were facilitative  
40 to implementation <sup>(144, 146, 151)</sup> and mitigated the likelihood of “turf wars” emerging if IP roles  
41 was perceived to encroach on professional territories<sup>(151)</sup>. While many nurses/pharmacists  
42 reported positive relationships with doctors<sup>(139, 141, 142, 148, 151)</sup>, others described jurisdictional  
43 tensions over prescribing authority<sup>(139, 145, 151)</sup>. Building trust for IP where relationships were  
44 weak took time<sup>(144)</sup>, and given the important supervisory role of doctors in IP<sup>(132, 134, 138, 141, 142,</sup>  
45 <sup>148, 149)</sup>, consideration of their strength in adoption planning is pertinent. Good communication  
46 networks were more likely where established relationships and positive attitudes towards IP  
47 prevailed<sup>(142, 151)</sup>, and were important for imparting information to teams about IP <sup>(138, 144, 146)</sup>,  
48 for developing supervision and peer support<sup>(142, 148)</sup> and promoting teamwork<sup>(146, 151)</sup>.  
49  
50  
51  
52  
53  
54  
55  
56  
57  
58  
59  
60



MainDocumentV3.0\_UNFormatted\_18052022

## **Analytical theme 2: Training – optimising practitioner readiness for independent prescribing**

This analytical theme refers to the extent to which organisations select and prepare the right practitioners for IP training, as well as how they support and maximise students' learning experiences.

### **Descriptive Theme 2.1: Selecting the right practitioners**

Overall, strategic planning for IP workforce selection lacked scrutiny, and practitioner choice<sup>(130, 132, 138)</sup>, expectation of improved job satisfaction<sup>(138, 145, 148)</sup>, efficiency and patient benefit<sup>(130, 138)</sup> were the primary drivers for implementation across the review period. Training course drop out<sup>(130)</sup> and failure to prescribe following training<sup>(132, 134)</sup>, suggest a need to ensure selection procedures match skills and capabilities to IP and increase the chances of organisational return on IP training investment. Synthesis identified essential skills<sup>(132, 135, 137, 138, 140, 148, 150, 152)</sup> and personal motivation<sup>(130, 132)</sup> as important considerations. Study demographic data indicated a clinically experienced workforce<sup>(132, 138, 139, 148, 149)</sup>, with degree/higher degree educational and/or specialist skills attainment<sup>(130, 135, 142, 150)</sup>. Advanced physical assessment and clinical specialty skills not only suggested expertise and theoretical knowledge to underpin IP but were also recognised by patients as important contributors to care quality<sup>(135, 140, 150)</sup>. Patients reported high levels of confidence in IP led care, with the caveat that prescribers demonstrated knowledge and expertise<sup>(135, 140, 150)</sup>. Good interpersonal, communication, examination, history taking and diagnostic skills were key. These were mandatory for differential diagnosis<sup>(135-137, 150, 152)</sup> and holistic management<sup>(138, 148, 152)</sup>, for conferring practitioner prescribing/non-prescribing decisions<sup>(136, 137, 152)</sup> and managing treatment concordance<sup>(132, 135, 137, 140, 146, 150, 152)</sup> and patient expectations for medicines<sup>(136, 137, 152)</sup>. Motivational deterrents to IP uptake that were identified by non-prescribing nurses<sup>(145)</sup> and physiotherapists<sup>(143)</sup> were being near retirement<sup>(145)</sup>, a reluctance to undertake further advanced training<sup>(143, 145)</sup>, concerns about training rigor<sup>(143)</sup>, and a perception of effort/remuneration imbalance<sup>(143, 145)</sup>. Although IP job satisfaction and professional benefits were considered future adoption drivers<sup>(145)</sup> lack of financial remuneration in particular disincentivised practice nurse<sup>(145)</sup> and physiotherapy adoption<sup>(143)</sup>.

### **Descriptive Theme 2.2: Preparing and supporting practitioners during training**

UK non-medical prescribing training programmes employ profession-specific or inter-professional models, delivering 26 days equivalent fulltime education alongside a supervised learning in practice period<sup>(129)</sup>. Given the onus for safe prescribing, programmes were reported by students and nurse/pharmacist prescribers to be academically rigorous<sup>(131, 148)</sup>. There was evidence however that students lacked key knowledge about generic training

MainDocumentV3.0\_UNFormatted\_18052022

1  
2  
3 models<sup>(145)</sup>, the learning expectations of different pedagogies<sup>(129)</sup>, as well as course  
4 assessment and portfolio requirements<sup>(130)</sup>. Expecting narrower, speciality specific rather  
5 than generic training was common<sup>(130, 148)</sup>. Students found the academic demands of training  
6 whilst continuing their usual clinical duties challenging indicating a need to better balance  
7 work, personal and academic commitments<sup>(129, 131)</sup>. The degree of allocated support time<sup>(130,</sup>  
8 <sup>131)</sup> and the quality of mentoring during supervised practice learning<sup>(129)</sup> were key influences  
9 on student learning experiences. Adequate study leave, protected time and backfill  
10 respectively optimised study time, reduced personal time encroachment and negated the  
11 need to absorb usual role duties whilst training<sup>(130)</sup>. Despite organisational requirement to  
12 confirm study leave arrangements pre-training, primary care allocation was highly  
13 unstandardised, with some students entering training without a confirmed agreement<sup>(130)</sup>.  
14 Prepared practice mentors with clarity on their role obligations in general provided a higher  
15 level of input to students<sup>(129)</sup>, and good mentor-student relationships that continued post-  
16 training facilitated transition<sup>(134)</sup>. Additional training buddying schemes helped students better  
17 manage the competing demands of training whilst working, although time constraints limited  
18 their uptake<sup>(131)</sup>.

### **Analytical theme 3: Transition – ensuring early prescribing support**

19  
20 This analytical theme highlighted the importance of the post-qualification transition period in  
21 the development of prescribing confidence/competence and identified a high need for  
22 supervision and informal and formal support. Delineating the scope of prescribing  
23 competence facilitated early implementation.

#### **Descriptive Theme 3.1: Transition as a point of vulnerability**

24  
25 Many nurses/pharmacists held vivid memories of anxiety and fear during their first IP  
26 encounters<sup>(139, 141, 142, 148, 149)</sup>, reporting a diminution of self-confidence during the early  
27 transition period<sup>(137, 139, 141, 142, 148, 149)</sup>. This finding traversed the review decade and was  
28 unrelated to how prepared prescribers felt by training<sup>(139, 148)</sup>. Heightened awareness of the  
29 risks of error<sup>(149)</sup>, the cautionary approach instilled by training<sup>(139, 149)</sup>, and liability for personal  
30 accountability<sup>(141, 148)</sup> fuelled feelings. It was recognised that self-confidence and competence  
31 development were essential for prescribing<sup>(139, 149)</sup> and mitigated anxiety<sup>(148)</sup>, but were highly  
32 dependent on exposure to prescribing opportunities<sup>(148, 149)</sup>, time<sup>(139, 149)</sup> and above all, the  
33 level of available support<sup>(129, 134, 141, 148, 149)</sup>. Without a channel for accessing supervision,  
34 nurses/pharmacists could doubt competence, lose confidence and defer from  
35 prescribing<sup>(149)</sup>. This led to a lack of competence development and underutilisation of IP<sup>(149)</sup>  
36 and suggests that greater acknowledgement of transitional developmental needs is  
37 necessary.

MainDocumentV3.0\_UNFormatted\_18052022

### **Descriptive Theme 3.2: Nurturing competence and confidence**

Establishing competence boundaries and recognising personal limitations were important enablers in transition<sup>(139, 149)</sup>. Nurse/pharmacist prescribers defined competence as the immediate clinical areas in which they had the knowledge and confidence to prescribe<sup>(138, 139, 141, 142, 149, 151)</sup>. Delineating individual scope of prescribing practice by restricting the range of medicines prescribed to circumscribed clinical areas<sup>(138, 142, 148, 151)</sup> in line with clinical guidelines and protocols<sup>(139)</sup> encouraged the early development of competence<sup>(149)</sup>.

Alternatively, prescribing outside these boundaries<sup>(139)</sup>, as in complex polypharmacy or comorbidity<sup>(134, 142)</sup>, was deemed risky, unsafe and unprofessional<sup>(138, 149, 151)</sup>.

Nurses/pharmacists reported that teams often failed to recognise their self-confidence issues related to competence<sup>(142)</sup>, and exerted inappropriate expectations for IP<sup>(134, 138, 139)</sup>.

Recognising that as a new skill, development of prescribing competence was time and opportunity dependent<sup>(139, 148, 149)</sup> several nurses expressed anxiety that prescribing skills would diminish during transition if not utilised<sup>(148)</sup>.

### **Descriptive Theme 3.3: Transition support needs**

Reports of poor transition support pervaded the review decade<sup>(132, 134, 137, 138, 141, 142, 148, 149)</sup> and there was limited evidence of pre-emptive, formalised supervision provision<sup>(134)</sup>. Nurses reported this absence as immediately impactful<sup>(141)</sup>, especially in isolated roles and in services with few prescribers<sup>(132, 149)</sup>. While nurses and pharmacists desired structured and informal supervision<sup>(142, 149)</sup>, in all 7 studies addressing this theme<sup>(132, 134, 138, 141, 142, 148, 149)</sup>, most could only access a variable level of informal support. "Open door" contemporaneous advice given by GPs was the primary source, although specialist doctors, peers and pharmacists were also consulted. Team receptiveness to providing this mentoring<sup>(149)</sup>, its reliability<sup>(137, 141)</sup> and accessibility<sup>(148, 149)</sup> were key facilitators. Informal opportunities for discussion provided security<sup>(149)</sup> and were valued<sup>(138, 141, 148, 149)</sup>. Exemplifying barrier interdependence, lack of mentoring relationships with doctors limited opportunity for informal support, prevented prescribing and limited competence with specific medicines or clinical conditions<sup>(149)</sup>. In turn this necessitated re-engagement of GP referral for prescribing and culminated in inequitable patient medicines management<sup>(142, 149)</sup>. To address shortfalls in formal support provision, several prescribers set up local peer networks<sup>(134, 138, 142)</sup>, however a strong desire for formalised mentorship was expressed<sup>(132, 138, 142, 149)</sup>.

MainDocumentV3.0\_UNFormatted\_18052022

## **Analytical theme 4: Sustainment – maximising and developing independent prescribing**

This analytical theme describes barriers and facilitators within the descriptive sub-themes of service delivery and supporting role development, which relate to how IP was used and maximised in primary care.

### **Descriptive Theme 4.1: Service delivery**

Prescribers reported that IP promoted efficient, streamlined services<sup>(138, 139, 141, 142, 144, 148)</sup>. However, views on how it impacted individual practitioner workload differed<sup>(138, 139, 141, 142, 148, 149)</sup>. IP reportedly lengthened consultations<sup>(132, 138)</sup>, added administrative tasks<sup>(141, 148)</sup> and increased job-related stress<sup>(138)</sup>. Undertaking in-depth holistic assessment to inform prescribing needs imposed time constraints<sup>(132, 152)</sup>, which were exacerbated in strict ten-minute clinic allocation systems<sup>(137, 138)</sup>. Additional time and experience could however be mitigating<sup>(137, 152)</sup>. Community IPs reported their main workload barriers as administrative and related to absent or incompatible electronic record and prescription generation systems<sup>(134, 141, 142, 148, 149, 152)</sup>. Seeking clinical information caused significant delays, in some cases causing IPs to revert to GP referral for prescribing needs<sup>(134, 141, 148, 149)</sup>. However, recent IT accessibility was suggested to mitigate retrieval problems<sup>(146)</sup>.

Attitudes towards role change because of IP also influenced perceptions about workload<sup>(138, 139)</sup>. Some prescribers perceived that GPs abdicated responsibility for prescribing following introduction of IP<sup>(148)</sup> which increased workload and job demand<sup>(138, 139)</sup>. Prescribers negatively referred to this as work offloading<sup>(139)</sup>, and were suspicious of underpinning financial motives<sup>(145)</sup>. Alternatively, other prescribers viewed the benefits of IP at a broader service level and as an opportunity to reduce GP colleague workforce pressures<sup>(134, 146, 148)</sup>. While GPs in one study stressed that their acceptance of pharmacist IP rested on whether it increased existing workload<sup>(144)</sup> limited team member involvement within studies precluded synthesis of wider primary care workload impact of IP.

### **Descriptive Theme 4.2: Supporting role development**

Despite limited contextual detail on workforce planning<sup>(132, 146, 151)</sup>, three broadly categorised “models” of IP implementation were identified. The first “*Enhancement*” model introduced IP to enhance the efficiency of existing nurse/pharmacist roles without changing the pattern of service provision, client group or condition complexity<sup>(139, 141, 142, 149, 151)</sup>. The second “*Substitution*” model adapted existing IP roles to directly substitute or replace GP services, which required some level of structural re-organisation of care and/or a change in core prescribing competence<sup>(132, 141, 144, 146, 148)</sup>, (e.g., substituting GPs in out-of-hours palliative care services and additionally managing non-cancer terminal illness<sup>(148)</sup>). The final, less

MainDocumentV3.0\_UNFormatted\_18052022

frequently evidenced “*Role specific*” model created new roles specifically for pharmacist prescribers, for which geriatric chronic disease and co-morbidity management were new areas of competence, and in which pharmacists assumed a transfer of responsibility from GPs for care home medicines management<sup>(144, 146)</sup>. One study found that the specific models of employment/funding influenced how well IP roles were integrated<sup>(151)</sup>, with direct GP practice employment as opposed to commissioned PCT funded roles creating greater sense of permanence, better role use, and enhanced team involvement. This was assumed to result from improved relationships, trust and team building<sup>(144, 146)</sup>.

A strategic top-down approach to implementation of IP was unclear from the reviewed studies, and overall an individual practitioner, bottom-up approach appeared to drive adoption. However, there was some evidence that where skill mix was recognised and valued within services<sup>(146, 151)</sup>, CPD was readily available<sup>(151)</sup> and doctors provided leadership<sup>(139, 151)</sup> IP was used to greater extent for primary care redesign and service sustainability. Absent policy and national targets restrained IP resource allocation<sup>(132)</sup>, whilst policy and national guidance was facilitative<sup>(144, 146)</sup>. Doctors also imposed constraints on IP by limiting clinical caseloads<sup>(139, 149)</sup>, restricting formularies<sup>(134, 151)</sup> or by retaining sole diagnostic prescribing responsibility for patients<sup>(132, 146)</sup>. For some prescribers, competence expansion was synonymous with crossing job descriptions and mandated formal negotiation with employers<sup>(149)</sup>.

Provision of CPD overall was inconsistent, untargeted to evolving learning needs<sup>(138, 149)</sup>, and prescribers identified pharmacology<sup>(141)</sup>, statutory drug updates<sup>(138)</sup> as key topics. Lack of confidence with heart failure<sup>(142)</sup>, mental health conditions<sup>(132)</sup>, polypharmacy and off-label prescribing<sup>(149)</sup> suggested CPD in co-morbidities warranted further input. Trust provision included forums/meetings<sup>(138, 142)</sup>, commissioned training, national conference attendance<sup>(141, 151)</sup> and electronic journal resources<sup>(141)</sup>. However, provision varied widely and with few prescribers reporting accessible CPD systems<sup>(138, 142)</sup>, there was agreement that improved implementation was necessary<sup>(132, 138, 141, 142, 149, 152)</sup>.

With time and input to create support systems<sup>(142)</sup> and enhance communication concerning role boundaries<sup>(148)</sup> prescribers reported that IP integration improved. However, formal evaluation following implementation was rare<sup>(134)</sup>, with only two studies<sup>(137, 152)</sup> identifying quality assurance activities such as audit and local/national data benchmarking in the context of antibiotic stewardship.

## Discussion

The future of UK primary care is reliant on workforce expansion and introduction of new first-contact non-medical roles<sup>(27, 153-156)</sup>. Ensuring practitioners have the right skills to enable sustainable service development, at scale and pace is key<sup>(157, 158)</sup>. Recent reports of rising non-medical prescriber numbers in some regions of the UK<sup>(30, 79, 159)</sup> suggest healthcare providers are recognising the value of prescribing for skill-mix and workforce transformation. Ensuring implementation is optimised, sustained and IP roles are maximised for service and patient benefit is essential.

This is the first meta-synthesis evaluating barriers and facilitators to the implementation of IP by non-medical healthcare professionals in primary care. Guided by theory and synthesising factors across a continuum of implementation provides a temporal dimension and insight into three primary '*enhancement*', '*substitution*', and '*role specific*' models of implementation that previous UK systematic reviews lack<sup>(54, 68, 69, 74)</sup>. In its infancy in UK primary care non-medical prescribing research<sup>(137, 146, 160, 161)</sup>, implementation theory is likely to become increasingly important for informing implementation strategies as the governance arrangements for extended prescribing rights grow in complexity<sup>(159)</sup> and the socio-political primary care landscape continues to change<sup>(162)</sup>.

From stakeholders' experiences of implementing IP, barriers and facilitators were identified in four key analytical themes: '*Preparation*', '*Training*', '*Transition*' and '*Sustainment*'. While some interdependence and overlap is acknowledged, these themes present a stage based road map of barriers and facilitators for consideration in future implementation.

In the theme '*Preparation*', the importance of organisational readiness for implementing IP was reflected by a need for consistent managerial leadership/support, improved team understanding of prescribing role intentions and an interprofessional environment that supports novice prescribers. While nurses and pharmacists considered IP integral to advanced practice and essential to enhance workforce skill utilisation there was concern that it lacked strategic prominence in primary care. Accordingly, the '*Training*' theme identified a need for improved managerial recognition of primary care workforce aspirations for IP along with a need to ensure skills and motivations matched those necessary for training. In line with national reports<sup>(43, 46, 55)</sup>, the response to the non-medical prescribing agenda has been sluggish in some UK regions<sup>(59)</sup>, with reforms to commissioning either marginalising<sup>(59)</sup> or fragmenting its funding<sup>(110, 163)</sup>. Moreover, in common with national evaluations<sup>(43, 59, 164, 165)</sup>, this synthesis identified a continuing practitioner led implementation of IP with largely voluntary uptake. Contrary to secondary care<sup>(62)</sup>, there was limited evidence<sup>(144, 146)</sup> for policy driven service design or targeted strategy embedding IP within career or service pathways. This suggests a disjointed approach to implementation that may reflect the rapidly changing

MainDocumentV3.0\_UNFormatted\_18052022

1  
2  
3 policy and service context of UK primary care<sup>(166-168)</sup>. However, with a third of the non-  
4 medical general practice workforce near retirement age<sup>(169)</sup>, and succession of IP roles  
5 lacking guarantee<sup>(151)</sup>, sustainability of non-medical prescribing capability is a key concern  
6 for future management of primary care patient medicines needs<sup>(170)</sup>.  
7  
8

9  
10 Transition was identified as a key stage in implementation that warrants greater scrutiny and  
11 has resonance for professions such as paramedics who are new to prescribing. While its  
12 affective nature<sup>(171, 172)</sup> and need for bespoke support systems has been previously  
13 recognised<sup>(173, 174)</sup>, few studies have specifically sampled novice prescribers<sup>(172, 175)</sup> to  
14 ascertain optimal supervisory requirements<sup>(171)</sup>. Despite extension of IP rights to  
15 optometrists, physiotherapists, radiographers, podiatrists and paramedics over the past  
16 thirteen years, focus on implementation issues during transition within each profession has  
17 been limited<sup>(43, 176, 177)</sup>. This is likely to be especially important for paramedics who, awarded  
18 IP rights in 2018 have not been subject to the supplementary prescribing lead in period that  
19 characterises other professions<sup>(178)</sup> and who are historically less well established in the  
20 primary care workforce<sup>(179, 180)</sup>. Early data suggesting challenges around role isolation, team  
21 expectations of paramedic IP and lack of legislative parity for controlled drugs warrants  
22 further exploration to determine whether paramedics too, face similar barriers identified by  
23 this review<sup>(177, 181)</sup>.  
24  
25  
26  
27  
28  
29  
30  
31  
32  
33

34 In common with other UK reviews<sup>(68, 69)</sup>, limited overall focus on long-term sustainability or  
35 strategy for implementation at either local, regional or national level was found. This was  
36 echoed by the dominance of the '*enhancement*', as opposed to '*role specific*' implementation  
37 models identified and may reflect the multiple changes made to policy<sup>(182)</sup>, leadership<sup>(183)</sup> and  
38 commissioning<sup>(184)</sup> and the on-going embedding of new governance structures within primary  
39 care<sup>(185)</sup>. Of note, despite finding a need for more cohesive managerial support that extends  
40 across the entire implementation trajectory, minimal reference was made to the championing  
41 and change agent functions of non-medical prescribing leads<sup>(173, 174)</sup>. The Department of  
42 Health has long recommended implementation of non-medical prescribing under direction of  
43 a designated lead with strategic, operational and governance footholds<sup>(33)</sup>. A lack of  
44 representation in recent regional research<sup>(159)</sup> supports the tenet that many of these roles  
45 were not replaced in England following the abolition of primary care trusts<sup>(174)</sup>. Successful  
46 implementation is more likely when champions are fully organisationally supported<sup>(186)</sup> and  
47 provide sustained input to implementation activities<sup>(173, 187, 188)</sup>. However, a lack of role  
48 infrastructure, clarity and designated time<sup>(159, 174)</sup>, along with the increasingly diverse non-  
49 medical prescribing workforce is challenging this important role. While other models of  
50 primary care workforce mentoring show promise<sup>(189)</sup>, the repetition and frequency of barriers  
51  
52  
53  
54  
55  
56  
57  
58  
59  
60

MainDocumentV3.0\_UNFormatted\_18052022

1  
2  
3 exposed by this synthesis over the review decade indicate urgent need for a more cohesive  
4 approach to supporting IP.  
5  
6

### 7 **Strengths and limitations**

8  
9 This review strengthens the UK evidence base by identifying challenges to IP  
10 implementation in traditional and contemporary primary care contexts. Using comprehensive  
11 search strategies and robust analysis methods, it highlights factors during '*Preparation*',  
12 '*Training*', '*Transition*' and '*Sustainment*' stages and models of implementation which can be  
13 used by practitioners and policymakers to identify areas for improving implementation  
14 support.  
15  
16  
17  
18  
19

20 Although limited to UK literature, the theoretical lens ensured focus on common factors  
21 known to facilitate implementation (e.g., the need for leadership and championing) which are  
22 generalisable to any implementation context, either in the UK or internationally. We did not  
23 however include grey literature and although qualitative synthesis enabled rich description of  
24 elements perceived by stakeholders to influence implementation of IP in the UK, reviews that  
25 include quantitative literature in primary care are encouraged. Our focus on primary care  
26 excluded barriers and facilitators that may be unique to acute care and other settings.  
27 Moreover, as the non-medical prescribing agenda is disseminated across the NHS, it will be  
28 increasingly important to consider the theoretical basis for developing strategies to achieve  
29 more successful implementation of this complex innovation in different professions<sup>(67, 119, 190)</sup>.  
30  
31  
32  
33  
34  
35  
36  
37

### 38 **Conclusion**

39 Globally, healthcare systems are implementing strategies to address workforce deficits that  
40 enhance the skills of nurses, pharmacists and other non-medical healthcare professionals.  
41 Integral to advanced scope of practice, it is imperative that IP capability is optimised through  
42 successful implementation. This meta-synthesis has identified persistent barriers at the  
43 '*Preparation*', '*Training*', '*Transition*' and '*Sustainment*' stages of implementation. A more  
44 coordinated and targeted approach to overcome barriers identified in these stages is key to  
45 ensuring that IP is an effective approach to helping alleviate workforce shortfalls in the UK,  
46 and around the world.  
47  
48  
49  
50  
51

### 52 **Contributors**

53  
54 JE and NC conceived the study. JE obtained funding, oversaw all aspects of the project and  
55 contributed to all stages. JE drafted this paper. JE designed and executed all the searches,  
56 data extraction, coding, and quality appraisal. NC contributed to all stages of the review,  
57  
58  
59  
60



MainDocumentV3.0\_UNFormatted\_18052022

1  
2  
3 including data extraction and coding. MC and NC contributed to the evolving synthesis and  
4 formulation of conclusions.  
5  
6  
7

### 8 **Funding**

9 This work was supported by a University of Surrey Doctoral Scholarship 2018-2021 award  
10 (6522700).  
11  
12

13 **Competing interests** None declared.

14 **Data sharing statement** No additional data are available.

15 **Patient consent for publication** Not required.

16 **Research Ethics Approval** Not applicable.

17 **Provenance and peer review** Not commissioned, externally peer reviewed.  
18  
19  
20  
21  
22  
23  
24  
25  
26  
27  
28  
29  
30  
31  
32  
33  
34  
35  
36  
37  
38  
39  
40  
41  
42  
43  
44  
45  
46  
47  
48  
49  
50  
51  
52  
53  
54  
55  
56  
57  
58  
59  
60

MainDocumentV3.0\_UNFormatted\_18052022

1. Dugani S, Veillard J, Evans T. Quality primary health care will drive the realization of universal health coverage. *CMAJ* 2018;190:E453-E454. doi: 10.1503/cmaj.180186
2. Kluge H, Kelley E, Swaminathan S, et al. After Astana: building the economic case for increased investment in primary health care. *Lancet* 2018;392(10160):2147-2152. doi: 10.1016/s0140-6736(18)32859-9
3. King's Fund. *The health care workforce in England. Make or break?* London: King's Fund, 2018.
4. Stenberg K, Hanssen O, Bertram M, et al. Guide posts for investment in primary health care and projected resource needs in 67 low-income and middle-income countries: a modelling study. *Lancet Glob Health* 2019;7:e1500-e1510. doi: 10.1016/S2214-109X(19)30416-4
5. WHO. *Operational framework for primary health care: transforming vision into action*. Geneva: World Health Organization, 2020.
6. Barnett K, Mercer SW, Norbury M, et al. Epidemiology of multimorbidity and implications for health care, research, and medical education: a cross-sectional study. *Lancet* 2012;380:37-43.
7. Stafford M, Steventon A, Thorlby R, et al. Briefing: *Understanding the health care needs of people with multiple health conditions*. London: The Health Foundation, 2018.
8. Kingston A, Robinson L, Booth H, et al. Projections of multi-morbidity in the older population in England to 2035: estimates from the Population Ageing and Care Simulation (PACSim) model. *Age Ageing* 2018;47(3):374-380.
9. Smith SM, Wallace E, O'Dowd T, et al. Interventions for improving outcomes in patients with multimorbidity in primary care and community settings. *Cochrane Database Syst Rev* 2016;4:CD006560.
10. WHO. *Multimorbidity: Technical Series on Safer Primary Care*. Geneva: World Health Organization, 2016.
11. Lim J, Broughan J, Crowley D, et al. COVID-19's impact on primary care and related mitigation strategies: A scoping review. *Eur J Gen Pract* 2021;27(1):166-175. doi: 10.1080/13814788.2021.1946681
12. Greenhalgh T, Knight MA, Court C, et al. Management of post-acute covid-19 in primary care. *BMJ* 2020;370 doi: 10.1136/bmj.m3026 pmid:32784198
13. Julia C, Yohan Saynac Y, Le Joubioux C, et al. Organising community primary care in the age of COVID-19: challenges in disadvantaged areas. *Lancet* 2020;5(6):e313. doi: doi.org/10.1016/S2468-2667(20)30115-8
14. Pettigrew LM, Kumpunen S, Mays N. Primary care networks: the impact of covid-19 and the challenges ahead. *BMJ* 2020;370:m3353. doi: 10.1136/bmj.m3353
15. Williams S, Tsiligianni I. COVID-19 poses novel challenges for global primary care. *NPJ Prim Care Respir Med* 2020;30(1):30. doi: 10.1038/s41533-020-0187-x
16. IQVIA Institute for Human Data Science. *Global Medicine Spending and Usage Trends: Outlook to 2024*. New York: IQVIA Institute for Human Data Science, 2020.
17. Avery A, Barber N, Ghaleb M, et al. *Investigating the Prevalence and Causes of Prescribing Errors in General Practice: The PRACTiCe Study*: General Medical Council, 2012.
18. WHO. *Declaration of Astana. Global Conference on Primary Health Care: from Alma-Ata towards universal health coverage and the Sustainable Development Goals*. Geneva: World Health Organization, 2018.
19. Osborn R, Moulds D, Schneider EC, et al. Primary Care Physicians In Ten Countries Report Challenges Caring For Patients With Complex Health Needs. *Health Aff* 2015;34:2104-2112.
20. Rosen R, Parker H. *New models of primary care: practical lessons from early implementers*. London: Nuffield Trust, 2013.
21. Ham C, Heenan D, Longley M, et al. *Integrated care in Northern Ireland, Scotland and Wales. Lessons for England*. London: The King's Fund, 2013.
22. Mercer SW, Gillies J, Noble-Jones R, et al. *National Evaluation of New Models of Primary Care in Scotland*. Glasgow: Scottish School of Primary Care, 2019.

MainDocumentV3.0\_UNFormatted\_18052022

- 1
- 2
- 3
- 4 23. NHS England. *Integrating care. Next steps to building strong and effective integrated care systems across England*. London: NHS England, 2020.
- 5
- 6 24. Welsh Government. *Our plan for a primary care service for Wales up to March 2018*: NHS Wales, 2015.
- 7
- 8 25. Morciano M, Checkland K, Hammond J, et al. Variability in size and characteristics of primary care networks in England: observational study. *Br J Gen Pract* 2020;70(701):e899-e905. doi: 10.3399/bjgp20X713441
- 9
- 10 26. Department of Health. *The NHS Long Term Plan*. London, UK: Department of Health, 2019.
- 11
- 12
- 13 27. Baird B, Beech J. *Primary care networks explained*. London: The King's Fund, 2020.
- 14 28. UK Parliament. *Health and Care Bill*. London: House of Commons, 2021.
- 15 29. Weeks G, George J, Maclure K, et al. Non-medical prescribing versus medical prescribing for acute and chronic disease management in primary and secondary care. *Cochrane Database Syst Rev* 2016;11:CD011227.
- 16
- 17 30. Alghamdi SSA, Hodson K, Deslandes P, et al. Prescribing trends over time by non-medical independent prescribers in primary care settings across Wales (2011–2018): a secondary database analysis. *BMJ Open* 2020;10(10):e036379. doi: 10.1136/bmjopen-2019-036379
- 18
- 19
- 20
- 21
- 22 31. National Prescribing Centre. *Non-medical prescribing by nurses, optometrists, pharmacists, physiotherapists, podiatrists and radiographers. A quick guide for commissioners*. Liverpool, 2010.
- 23
- 24 32. Hogg, D. *Prescription, supply and administration of medicines by allied health professionals - where are we now and where are we going?* Regional AHP Non-Medical Prescriber Forum. Taunton, 2019.
- 25
- 26 33. Department of Health. *Improving Patients' Access to Medicines: A Guide to Implementing Nurse and Pharmacist Independent Prescribing within the NHS in England*. 2nd ed. Leeds, 2006.
- 27
- 28 34. Graham-Clarke E, Rushton A, Noblet T, et al. Non-medical prescribing in the United Kingdom National Health Service: a systematic policy review. *PLoS One* 2019;14(7):e0214630. doi: <https://doi.org/10.1371/journal.pone.0214630>
- 29
- 30 35. HM Government. *The Medicines for Human Use (Prescribing) (Miscellaneous Amendments) Order, 2006*.
- 31
- 32 36. The National Health Service. *Miscellaneous Amendments Relating to Independent Prescribing Regulations*. London, 2006.
- 33
- 34 37. General Pharmaceutical Council. *Standards for the education and training of pharmacist independent prescribers*. London: 2019.
- 35
- 36 38. Health and Care Professions Council. *Standards for prescribing*. London, 2019.
- 37
- 38 39. NMC. *Standards for prescribing programmes 2019*. Available from: <https://www.nmc.org.uk/standards/standards-for-post-registration/standards-for-prescribers/standards-of-proficiency-for-nurse-and-midwife-prescribers/> (accessed 12 January 2021).
- 39
- 40
- 41 40. Hales L, Lohan M, Jordan J. 'It's another way of standing outside the door' supplementary prescribing and doctor-nurse partnerships. *Soc Theory Health* 2010;8(2):210-228. doi: 10.1057/sth.2010.1
- 42
- 43 41. Hill DR, Conroy S, Brown RC, et al. Stakeholder views on pharmacist prescribing in addiction services in NHS Lanarkshire. *J Subst Use* 2014;19(1):56-67. doi: 10.3109/14659891.2012.734540
- 44
- 45 42. Carey N, Stenner K, Courtenay M. An exploration of how nurse prescribing is being used for patients with respiratory conditions across the east of England. *BMC Health Serv Res* 2014;14:27. doi: 10.1186/1472-6963-14-27
- 46
- 47 43. Carey N, Stenner K, Edwards J, et al. Evaluation of Physiotherapist and Podiatrist Independent Prescribing, Mixing of Medicines and Prescribing of Controlled Drugs. Department of Health Policy Research PR-R7-0513-11002. Guildford, UK: University of Surrey, 2017.
- 48
- 49
- 50
- 51
- 52
- 53
- 54
- 55
- 56
- 57
- 58
- 59
- 60

MainDocumentV3.0\_UNFormatted\_18052022

- 1
- 2
- 3
- 4 44. Courtenay M, Carey N, Stenner K. An overview of non medical prescribing across one
- 5 strategic health authority: a questionnaire survey. *BMC Health Serv Res*
- 6 2012;12:138. doi: 10.1186/1472-6963-12-138
- 7 45. Bhanbhro S, Drennan VM, Grant R, et al. Assessing the contribution of prescribing in
- 8 primary care by nurses and professionals allied to medicine: a systematic review of
- 9 literature. *BMC Health Serv Res* 2011;11:330. doi: 10.1186/1472-6963-11-330
- 10 46. Latter S, Blenkinsopp A, Smith A, et al. Evaluation of nurse and pharmacist independent
- 11 prescribing. Southampton: University of Southampton, 2010.
- 12 47. Latter S, Smith A, Blenkinsopp A, et al. Are nurse and pharmacist independent
- 13 prescribers making clinically appropriate prescribing decisions? An analysis of
- 14 consultations. *J Health Serv Res Policy* 2012;17(3):149-156. doi:
- 15 10.1258/jhsrp.2012.011090
- 16 48. Carey N, Edwards J, Otter S, et al. A comparative case study of prescribing and non-
- 17 prescribing physiotherapists and podiatrists. *BMC Health Serv Res* 2020;20(1):1074.
- 18 doi: 10.1186/s12913-020-05918-8
- 19 49. Ecker S, Joshi R, Shanthosh J, et al. Non-Medical prescribing policies: A global scoping
- 20 review. *Health Policy* 2020;124(7):721-726. doi: 10.1016/j.healthpol.2020.04.015
- 21 [published Online First: 2020/05/31]
- 22 50. Faruquee C, Guirguis L, Hughes C, et al. Characterizing pharmacist prescribers in
- 23 Alberta using cluster analysis. *J Pharm Health Serv Res* 2018;10 doi:
- 24 10.1111/jphs.12276
- 25 51. Fong J, Cashin A, Buckley T. Models of prescribing, scope of practice, and medicines
- 26 prescribed, a survey of nurse practitioners. *J Adv Nurs* 2020;76(9):2311-2322. doi:
- 27 <https://doi.org/10.1111/jan.14444>
- 28 52. Kroezen M, van Dijk L, Groenewegen PP, et al. Nurse prescribing of medicines in
- 29 Western European and Anglo-Saxon countries: a systematic review of the literature.
- 30 *BMC Health Serv Res* 2011;11:127.
- 31 53. Ladd E, Schober M. Nurse prescribing from the global vantage point: the intersection
- 32 between role and policy. *Policy Polit Nurs Pract* 2018;0(0):1-10.
- 33 54. Mills T, Patel N, Ryan K. Pharmacist non-medical prescribing in primary care. A
- 34 systematic review of views, opinions, and attitudes. *Int J Clin Pract* 2020:e13827. doi:
- 35 <https://doi.org/10.1111/ijcp.13827>
- 36 55. Courtenay M, Khanfer R, Harries-Huntly G, et al. Overview of the uptake and
- 37 implementation of non-medical prescribing in Wales: a national survey. *BMJ Open*
- 38 2017;7(9):e015313. doi: 10.1136/bmjopen-2016-015313
- 39 56. Dobel-Ober D, Brimblecombe N. National survey of nurse prescribing in mental health
- 40 services; a follow-up 6 years on. *J Psychiatr Ment Health Nurs* 2016;23(6/7):378-386.
- 41 doi: 10.1111/jpm.12329
- 42 57. Wilson N, Pope C, Roberts L, et al. Limited pharmaceuticalisation: a qualitative case
- 43 study of physiotherapist prescribing practices in an NHS Trust in England following
- 44 the expansion of non-medical prescribing in the UK. *Sociol Health Illn* 2019;42:643-
- 45 659. doi: [doi.org/10.1111/1467-9566.13050](https://doi.org/10.1111/1467-9566.13050)
- 46 58. Weiss MC. The rise of non-medical prescribing and medical dominance. *Res Social Adm*
- 47 *Pharm* 2020;17:632-637. doi: <https://doi.org/10.1016/j.sapharm.2020.05.015>
- 48 59. Coull A, Murray I, Turner-Halliday F, et al. The expansion of nurse prescribing in
- 49 Scotland: an evaluation. *Br J Community Nurs* 2013;18(5):235-242.
- 50 60. Drennan J, Naughton C, Allen D, et al. Independent Evaluation of the Nurse and Midwife
- 51 Prescribing Initiative. Dublin: University College Dublin, 2009.
- 52 61. Casey M, Rhode D, Higgins A, et al. "Providing a complete episode of care": a survey of
- 53 registered nurse and registered midwife prescribing behaviours and practices. *J Clin*
- 54 *Nurs* 2020;29:152-162.
- 55 62. Fisher J, Kinnear M, Reid F, et al. What supports hospital pharmacist prescribing in
- 56 Scotland? - A mixed methods, exploratory sequential study. *Res Social Adm Pharm*
- 57 2018;14(5):488-497. doi: 10.1016/j.sapharm.2017.06.007
- 58
- 59
- 60

MainDocumentV3.0\_UNFormatted\_18052022

63. Ross JD, Kettles AM. Mental health nurse independent prescribing: what are nurse prescribers' views of the barriers to implementation? *J Psychiatr Ment Health Nurs* 2012;19(10):916-932. doi: 10.1111/j.1365-2850.2011.01872.x
64. Stewart D, Maclure K, Newham R, et al. A cross-sectional survey of the pharmacy workforce in general practice in Scotland. *Fam Pract* 2020;37(2):206-212. doi: 10.1093/fampra/cmz052 [published Online First: 2019/09/20]
65. General Pharmaceutical Council. *Prescribers survey report*. London, 2016.
66. Stenner K, Carey N, Courtenay M. Implementing nurse prescribing: a case study in diabetes. *J Adv Nurs* 2010;66(3):522-531. doi: 10.1111/j.1365-2648.2009.05212.x
67. Stewart D, Jebara T, Cunningham S, et al. Future perspectives on nonmedical prescribing. *Ther Adv Drug Saf* 2017;8(6):183-197. doi: 10.1177/2042098617693546
68. Graham-Clarke E, Rushton A, Noblet T, et al. Facilitators and barriers to non-medical prescribing - A systematic review and thematic synthesis. *PLoS One* 2018;13(4):e0196471-e0196471. doi: 10.1371/journal.pone.0196471
69. Noblet T, Marriott J, Graham-Clarke E, et al. Barriers to and facilitators of independent non-medical prescribing in clinical practice: a mixed-methods systematic review. *J Physiother* 2017;63(4):221-234. doi: 10.1016/j.jphys.2017.09.001
70. Jebara T, Cunningham S, MacLure K, et al. Stakeholders' views and experiences of pharmacist prescribing: a systematic review. *Br J Clin Pharmacol* 2018;84(9):1883-1905. doi: 10.1111/bcp.13624
71. Nuttall D. Nurse prescribing in primary care: a metasynthesis of the literature. *Prim Health Care Res Dev* 2018;19(1):7-22. doi: 10.1017/S1463423617000500
72. Zhou M, Desborough J, Parkinson A, et al. Barriers to pharmacist prescribing; a scoping review comparing UK, New Zealand, Canadian and Australian experiences. *Int J Pharm Pract* 2019;27(6):479-489.
73. Edwards J, Coward M, Carey N. Paramedic independent prescribing in primary care: seven steps to success. *J Prescr Pract* 2020;2(6):292-299. doi: 10.12968/jprp.2020.2.6.292
74. Magowan J. Barriers and enablers to nurse prescribing in primary care. *J Prescr Pract* 2020;2(3):142-146. doi: 10.12968/jprp.2020.2.3.142
75. Carey N, Stenner K, Courtenay M. Stakeholder views on the impact of nurse prescribing on dermatology services. *J Clin Nurs* 2010;19:498-506.
76. Stewart F, Caldwell G, Cassells K, et al. Building capacity in primary care: the implementation of a novel 'Pharmacy First' scheme for the management of UTI, impetigo and COPD exacerbation. *Prim Health Care Res Dev* 2018;19:531-541. doi: 10.1017/s1463423617000925
77. Maskrey M, Johnson CF, Cormack J, et al. Releasing GP capacity with pharmacy prescribing support and New Ways of Working: a prospective observational cohort study. *Br J Gen Pract* 2018;68(675):e735-e742. doi: 10.3399/bjgp18X699137
78. Mann C, Anderson C, Waring J, et al. "GP Pharmacy Transformation project" *Community Pharmacist Independent Prescribers (CPIPs) working in patient facing roles in Primary Care. Independent Evaluation Report*. Nottingham: University of Nottingham, NHS England, 2017.
79. Northamptonshire GP Forward View Programme. *Primary Care Workforce Strategy*. Northampton: Corby Clinical Commissioning Group and Nene Clinical Commissioning Group, 2017.
80. Greenhalgh T, Robert G, Macfarlane F, et al. Diffusion of innovations in service organizations: systematic review and recommendations. *Milbank Q* 2004;82(4):581-629.
81. Rogers E. *Diffusion of Innovations*. 5th ed. New York, USA: The Free Press 2003.
82. Damschroder L, Keith RE, Aaron DC, et al. Fostering implementation of health services research findings into practice: A consolidated framework for advancing implementation science. *Implementation science* 2009;7(4):50.

MainDocumentV3.0\_UNFormatted\_18052022

- 1
- 2
- 3
- 4 83. Lambert-Kerzner AC, Aasen DM, Overbey DM, et al. Use of the consolidated framework
- 5 for implementation research to guide dissemination and implementation of new
- 6 technologies in surgery. *J Thorac Dis* 2019;11(4):S487–S499.
- 7 84. Chor KH, Wisdom JP, Olin SC, et al. Measures for predictors of innovation adoption.
- 8 *Adm Policy Ment Health* 2015;42:545-573.
- 9 85. Dearing J, Cox J. Diffusion Of Innovations Theory, Principles, And Practice. *Health Aff*
- 10 2018;37:183-190. doi: 10.1377/hlthaff.2017.1104
- 11 86. Dearing JW, Singhal A. New directions for diffusion of innovations research:
- 12 Dissemination, implementation, and positive deviance. *Hum Behav Emerg Technol*
- 13 2020;2(4):307-313. doi: <https://doi.org/10.1002/hbe2.216>
- 14 87. Breimaier HB, Heckemann B, Halfens RJG, et al. The Consolidated Framework for
- 15 Implementation Research (CFIR): a useful theoretical framework for guiding and
- 16 evaluating a guideline implementation process in a hospital-based nursing practice.
- 17 *BMC Nurs* 2015;14:43.
- 18 88. CFIR. Consolidated Framework for Implementation Research. Ann Arbor: USA: CFIR
- 19 Research Team-Center for Clinical Management Research.; 2021 Available from:
- 20 <https://cfirguide.org/tools/> (accessed 21 January 2021)
- 21 89. Damschroder LJ, Reardon CM, Sperber N, et al. Implementation evaluation of the
- 22 Telephone Lifestyle Coaching (TLC) program: organizational factors associated with
- 23 successful implementation. *Transl Behav Med* 2017;7(2):233-241. doi:
- 24 10.1007/s13142-016-0424-6
- 25 90. Tong A, Flemming K, McInnes E, et al. Enhancing transparency in reporting the
- 26 synthesis of qualitative research: ENTREQ. *BMC Med Res Methodol* 2012;12(1):181.
- 27 doi: 10.1186/1471-2288-12-181
- 28 91. Page MJ, McKenzie JE, Bossuyt PM, et al. The PRISMA 2020 statement: an updated
- 29 guideline for reporting systematic reviews. *BMJ* 2021;372:n71.
- 30 92. Aguirre R, Bolton K. Qualitative interpretive meta-synthesis in social work research:
- 31 Uncharted territory. *J Soc Work* 2014;14:279-294. doi: 10.1177/1468017313476797
- 32 93. Nye E, Melendez-Torres GJ, Bonell C. Origins, methods and advances in qualitative
- 33 meta-synthesis. *Rev Educ* 2016;4(1):57-79. doi: <https://doi.org/10.1002/rev3.3065>
- 34 94. Booth A, Noyes J, Flemming K, et al. Guidance on choosing qualitative evidence
- 35 synthesis methods for use in health technology assessments of complex
- 36 interventions (on-line) 2016. Available from: <http://www.integrate-hta.eu/downloads/>
- 37 (accessed 17 December 2021)
- 38 95. National Cancer Institute. *Qualitative Research in Implementation Science (QualRIS)*.
- 39 USA: U.S. Department of Health and Human Sciences, National Institutes of Health,
- 40 2019.
- 41 96. Michie S, Fixsen D, Grimshaw JM, et al. Specifying and reporting complex behaviour
- 42 change interventions: the need for a scientific method. *Implementation science*
- 43 2009;4(1):40. doi: 10.1186/1748-5908-4-40
- 44 97. Edwards J, Coward M, Carey N. *Barriers and facilitators to implementation of non-*
- 45 *medical independent prescribing in primary care: a qualitative systematic review*
- 46 *(CRD42019124400)*. York: PROSPERO; 2019.
- 47 98. Bosch M, Van Der Weijden T, Wensing M, et al. Tailoring quality improvement
- 48 interventions to identified barriers; a multiple case analysis. *J Eval Clin Pract*
- 49 2007;13:161-168.
- 50 99. Grol R, Wensing M. What Drives Change? Barriers to and Incentives for Achieving
- 51 Evidence-Based Practice. *Med J Aust* 2004;180:S57-60. doi: 10.5694/j.1326-
- 52 5377.2004.tb05948.x
- 53 100. Nilsson-Kajermo K, Bostrom A-M, Thompson DS, et al. The BARRIERS scale - the
- 54 barriers to research utilization scale: a systematic review. *Implementation science :*
- 55 *IS* 2010;5(32)
- 56 101. Shaw B, Cheater F, Baker R, et al. Tailored interventions to overcome identified
- 57 barriers to change: effects on professional practice and health care outcomes.
- 58 *Cochrane Database Syst Rev* 2005:CD005470.
- 59
- 60

MainDocumentV3.0\_UNFormatted\_18052022

102. WHO. *How do we ensure that innovation in health service delivery and organization is implemented, sustained and spread?* Copenhagen: European Observatory on Health Systems and Policies, 2018.
103. Cooke A, Smith D, Booth A. Beyond PICO: the SPIDER tool for qualitative evidence synthesis. *Qual Health Res* 2012;22(10):1435-1443. doi: 10.1177/1049732312452938 [published Online First: 2012/07/26]
104. Rogers M, Bethel A, Abbott R. Locating qualitative studies in dementia on MEDLINE, EMBASE, CINAHL, and PsycINFO: A comparison of search strategies. *Res Synth Methods* 2018;9(4):579-586. doi: 10.1002/jrsm.1280 [published Online First: 2017/10/29]
105. Rosumeck S, Wagner M, Wallraf S, et al. A validation study revealed differences in design and performance of search filters for qualitative research in PsycINFO and CINAHL. *J Clin Epidemiol* 2020;128:101-108. doi: <https://doi.org/10.1016/j.jclinepi.2020.09.031>
106. Department of Health. *Equity and excellence: Liberating the NHS*. London, UK, 2010.
107. HM Government. *The Health and Social Care Act 2012*. London: The Stationery Office, 2012.
108. NHS England. *Five Year Forward View*. London: NHS England, 2014.
109. Vizard P, Obolenskaya P. The Coalition's Record on Health: Policy, Spending and Outcomes 2010-2015. *Social Policy in a Cold Climate: Working Paper*. London, UK: The London School of Economics and Political Science, 2015.
110. Gadsby EW, Peckham S, Coleman A, et al. Commissioning for health improvement following the 2012 health and social care reforms in England: what has changed? *BMC Public Health* 2017;17(1):1-11. doi: 10.1186/s12889-017-4122-1
111. Miller T, Bonas S, Dixon Woods M. Qualitative research on breastfeeding in the UK: a narrative review and methodological reflection. *Evid Policy* 2007;3:197-230.
112. Noyes J, Popay J. Directly observed therapy and tuberculosis: how can a systematic review of qualitative research contribute to improving services? A qualitative meta-synthesis. *J Adv Nurs* 2007;57(3):227-243. doi: 10.1111/j.1365-2648.2006.04092.x [published Online First: 2007/01/20]
113. Carroll C, Booth A, Lloyd-Jones M. Should we exclude inadequately reported studies from qualitative systematic reviews? An evaluation of sensitivity analyses in two case study reviews. *Qual Health Res* 2012;22:1425-1434.
114. Sirriyeh R, Lawton R, Gardner P, et al. Reviewing studies with diverse designs: the development and evaluation of a new tool. *J Eval Clin Pract* 2012;18(4):746-752. doi: 10.1111/j.1365-2753.2011.01662.x [published Online First: 2011/03/18]
115. Fenton L, Lauckner H, Gilbert R. The QATSDD critical appraisal tool: comments and critiques. *J Eval Clin Pract* 2015;21:1125-1128.
116. National Institute of Care and Health Excellence. *Developing NICE guidelines: the manual*. London, 2020. Available from: <https://www.nice.org.uk/process/pmg20/chapter/reviewing-research-evidence> (accessed 25 December 2020).
117. Noyes J, Booth A, Lewin S, et al. Applying GRADE-CERQual to qualitative evidence synthesis findings-paper 6: how to assess relevance of the data. *Implement Sci* 2018;13(1):4. doi: 10.1186/s13012-017-0693-6
118. Fixsen DL, Blase KA, Van Dyke MK. *The stages of implementation*. *Implementation Practice & Science*. Chapel Hill, NC: Active Implementation Research Network 2019:81-108.
119. Nilsen P. Making sense of implementation theories, models and frameworks. *Implementation science : IS* 2015;10:53.
120. Saldana L. The stages of implementation completion for evidence-based practice: protocol for a mixed methods study. *Implementation science : IS* 2014;9(1):43. doi: 10.1186/1748-5908-9-43

MainDocumentV3.0\_UNFormatted\_18052022

121. Thomas J, Harden A. Methods for the thematic synthesis of qualitative research in systematic reviews. *BMC Med Res Methodol* 2008;8:45. doi: 10.1186/1471-2288-8-45 [published Online First: 2008/07/12]
122. Sandelowski M. What ever happened to qualitative description? *Res Nurs Health* 2000;23:334-340.
123. Checkland K, Harrison S, Marshall M. Is the metaphor of 'barriers to change' useful in understanding implementation? Evidence from general medical practice. *J Health Serv Res Policy* 2007;12(2):95-100.
124. Hossain LN, Fernandez-Llimos F, Luckett T, et al. Qualitative meta-synthesis of barriers and facilitators that influence the implementation of community pharmacy services: perspectives of patients, nurses and general medical practitioners. *BMJ Open* 2017;7(9):e015471. doi: 10.1136/bmjopen-2016-015471 [published Online First: 2017/09/08]
125. NVivo qualitative data analysis software, Version 12. [program], 2018.
126. Evans C, Tweheyo R, McGarry J, et al. Seeking culturally safe care: a qualitative systematic review of the healthcare experiences of women and girls who have undergone female genital mutilation/cutting. *BMJ Open* 2019;9(5):e027452-e027452. doi: 10.1136/bmjopen-2018-027452
127. Booth A, Carroll C, Ilott I, et al. Desperately seeking dissonance: identifying the disconfirming case in qualitative evidence synthesis. *Qual Health Res* 2013;23(1):126-141. doi: 10.1177/1049732312466295 [published Online First: 2012/11/21]
128. Bazeley P. Analysing qualitative data: More than 'identifying themes'. *Malays J Qual Res* 2009;2
129. Afseth JD, Paterson RE. The views of non-medical prescribing students and medical mentors on interprofessional competency assessment – A qualitative exploration. *Nurse Educ Today* 2017;52:103-108. doi: 10.1016/j.nedt.2017.02.022
130. Boreham N, Coull AF, Murray ID, et al. Education programmes preparing independent prescribers in Scotland: an evaluation. *Nurse Educ Today* 2013;33(4):321-326. doi: 10.1016/j.nedt.2013.01.018
131. Bowskill D, Meade O, Lymn JS. Use and evaluation of a mentoring scheme to promote integration of non-medical prescribing in a clinical context. *BMC Med Educ* 2014;14:1-12. doi: 10.1186/1472-6920-14-177
132. Brodie L, Donaldson J, Watt S. Non-medical prescribers and benzodiazepines: A qualitative study. *Nurse Prescribing* 2014;12(7):353-359.
133. Carter M, Chapman S, Watson MC. Multiplicity and complexity: a qualitative exploration of influences on prescribing in UK general practice. *BMJ Open* 2021;11(1):e041460. doi: 10.1136/bmjopen-2020-041460
134. Cole T, Gillett K. Are nurse prescribers issuing prescriptions in palliative care? *Nurse Prescribing* 2015;13(2):98-102. doi: 10.12968/npre.2015.13.2.98
135. Courtenay M, Stenner K, Carey N. The views of patients with diabetes about nurse prescribing. *Diabet Med* 2010;27(9):1049-1054. doi: 10.1111/j.1464-5491.2010.03051.x
136. Courtenay M, Rowbotham S, Lim R, et al. Antibiotics for acute respiratory tract infections: a mixed-methods study of patient experiences of non-medical prescriber management. *BMJ Open* 2017;7(3):e013515-e013515. doi: 10.1136/bmjopen-2016-013515
137. Courtenay M, Rowbotham S, Lim R, et al. Examining influences on antibiotic prescribing by nurse and pharmacist prescribers: a qualitative study using the Theoretical Domains Framework and COM-B. *BMJ Open* 2019;9(6):e029177. doi: 10.1136/bmjopen-2019-029177
138. Cousins R, Donnell C. Nurse prescribing in general practice: a qualitative study of job satisfaction and work-related stress. *Fam Pract* 2012;29(2):223-227. doi: 10.1093/fampra/cm077



MainDocumentV3.0\_UNFormatted\_18052022

- 1  
2  
3 139. Daughtry J, Hayter M. A qualitative study of practice nurses' prescribing experiences. *Pract Nurs* 2010;21(6):310-314. doi: 10.12968/pnur.2010.21.6.48329
- 4  
5 140. Dhalivaal J. Patients' perspectives on prescribing by nurses in general practice. *Pract*  
6  
7 *Nurs* 2011;22(1):41-46.
- 8 141. Downer F, Shepherd CK. District nurses prescribing as nurse independent prescribers.  
9 *Br J Community Nurs* 2010;15(7):348-352.
- 10 142. Herklots A, Baileff A, Latter S. Community matrons' experience as independent  
11 prescribers. *Br J Community Nurs* 2015;20(5):217. doi: 10.12968/bjcn.2015.20.5.217
- 12 143. Holden MA, Whittle R, Waterfield J, et al. A mixed methods exploration of  
13 physiotherapist's approaches to analgesic use among patients with hip osteoarthritis.  
14 *Physiotherapy* 2019;105(3):328-337. doi: 10.1016/j.physio.2018.08.003
- 15 144. Inch J, Notman F, Bond CM, et al. The Care Home Independent Prescribing  
16 Pharmacist Study (CHIPPS) - a non-randomised feasibility study of independent  
17 pharmacist prescribing in care homes. *Pilot Feasibility Stud* 2019;5:89. doi:  
18 10.1186/s40814-019-0465-y [published Online First: 2019/07/25]
- 19 145. Kelly A, Neale J, Rollings R. Barriers to extended nurse prescribing among practice  
20 nurses. *Community Pract* 2010;83(1):21-24.
- 21 146. Lane K, Bond C, Wright D, et al. "Everyone needs to understand each other's systems":  
22 Stakeholder views on the acceptability and viability of a Pharmacist Independent  
23 Prescriber role in care homes for older people in the UK. *Health Soc Care*  
24 *Community* 2020;28(5):1479-1487. doi: <https://doi.org/10.1111/hsc.12970>
- 25 147. Latham K, Nyatanga B. Community palliative care clinical nurse specialists as  
26 independent prescribers: part 1. *Br J Community Nurs* 2018;23(2):94-98. doi:  
27 10.12968/bjcn.2018.23.2.94
- 28 148. Latham K, Nyatanga B. Community palliative care clinical nurse specialists as  
29 independent prescribers: part 2. *Br J Community Nurs* 2018;23(3):126-133. doi:  
30 10.12968/bjcn.2018.23.3.126
- 31 149. Maddox C, Halsall D, Hall J, et al. Factors influencing nurse and pharmacist willingness  
32 to take or not take responsibility for non-medical prescribing. *Res Social Adm Pharm*  
33 2016;12(1):41-55. doi: 10.1016/j.sapharm.2015.04.001
- 34 150. Stenner KL, Courtenay M, Carey N. Consultations between nurse prescribers and  
35 patients with diabetes in primary care: A qualitative study of patient views. *Int J Nurs*  
36 *Stud* 2011;48(1):37-46. doi: 10.1016/j.ijnurstu.2010.06.006
- 37 151. Weiss MC, Platt J, Riley R, et al. GPs, nurses and pharmacists as prescribers in  
38 primary care: an exploration using the social identity approach / Hausärzte/-innen,  
39 Diplomierte Pflegefachpersonen und Apotheker/-innen als Arzneimittelverschreiber/-  
40 innen: eine Exploration mit dem Ansatz der Sozialen Identität. *Int J Health Prof*  
41 2016;3(2):153-164. doi: [doi.org/10.1515/ijhp-2016-0023](https://doi.org/10.1515/ijhp-2016-0023)
- 42 152. Williams SJ, Halls AV, Tonkin-Crine S, et al. General practitioner and nurse prescriber  
43 experiences of prescribing antibiotics for respiratory tract infections in UK primary  
44 care out-of-hours services (the UNITE study). *J Antimicrob Chemother*  
45 2018;73(3):795-803. doi: 10.1093/jac/dkx429
- 46 153. Health Education England. *The future of primary care. Creating teams for tomorrow*.  
47 London, UK: Primary Care Workforce Commission, 2015.
- 48 154. Health Education England. *Elective Care High Impact Interventions: First Contact*  
49 *Practitioner for MSK Services*. London: Health Education England, NHS Improvement,  
50 2019.
- 51 155. NHS England. *Building the workforce — the new deal for general practice*. London:  
52 NHS England, Health Education England, 2015.
- 53 156. NHS England. *General Practice Forward View*. London: NHS England, 2016.
- 54 157. Beech J, Bottery S, Charlesworth A, et al. *Closing the gap. Key areas for action on the*  
55 *health and care workforce*. London, UK: The Nuffield Trust, 2019.
- 56 158. Primary Care Workforce Commission. *The future of primary care. Creating teams for*  
57 *tomorrow. Report by the Primary Care Workforce Commission*. In: Roland M, ed.  
58 London: Health Education England, 2015.  
59  
60

MainDocumentV3.0\_UNFormatted\_18052022

- 1  
2  
3 159. Jarmain S, Carey N. Exploring the roles and responsibilities of non-medical prescribing  
4 leads in the South West of England. *J Prescr Pract* 2020;2(10):546-554.
- 5 160. Lim R, Courtenay M, Deslandes R, et al. Theory-based electronic learning intervention  
6 to support appropriate antibiotic prescribing by nurse and pharmacist independent  
7 prescribers: an acceptability and feasibility experimental study using mixed methods.  
8 *BMJ Open* 2020;10(6):e036181. doi: 10.1136/bmjopen-2019-036181
- 9 161. Reeve J, Britten N, Byng R, et al. Identifying enablers and barriers to individually  
10 tailored prescribing: a survey of healthcare professionals in the UK. *BMC Fam Pract*  
11 2018;19(1):17. doi: 10.1186/s12875-017-0705-2
- 12 162. Lau R, Stevenson F, Ong BN, et al. Achieving change in primary care—effectiveness of  
13 strategies for improving implementation of complex interventions: systematic review  
14 of reviews. *BMJ Open* 2015;5(12):e009993. doi: 10.1136/bmjopen-2015-009993
- 15 163. Ham C, Baird B, Gregory S, et al. *The NHS under the coalition government. Part one:  
16 NHS reform*. London: King's Fund, 2015.
- 17 164. Hacking S, Taylor J. *An evaluation of the scope and practice of Non Medical  
18 Prescribing in the North West For NHS North West*. Manchester, UK: NHS North  
19 West, 2010.
- 20 165. i5 Health. *Non-Medical Prescribing; An Economic Evaluation*: NHS Health Education  
21 North West, 2015.
- 22 166. Pettigrew LM, Kumpunen S, Mays N, et al. The impact of new forms of large-scale  
23 general practice provider collaborations on England's NHS: a systematic review. *Br J  
24 Gen Pract* 2018;68(668):e168. doi: 10.3399/bjgp18X694997
- 25 167. Sheaff RJ. Plural provision of primary medical care in England, 2002–2012. *Health Serv  
26 Res Policy* 2013;18:20–28.
- 27 168. Smith J, Holder H, Edwards N, et al. *Securing the future of general practice: new  
28 models of primary care*. London: Kings' Fund, Nuffield Trust, 2013.
- 29 169. NHS Digital. *General Practice Workforce: interactive dashboard*. London: NHS Digital,  
30 2022.
- 31 170. Tonna A, McCaig D, Diack L, et al. Development of consensus guidance to facilitate  
32 service redesign around pharmacist prescribing in UK hospital practice. *Int J Clin  
33 Pharm* 2014;36(5):1069-1076. doi: 10.1007/s11096-014-9996-8
- 34 171. Abuzour AS, Lewis PJ, Tully MP. Practice makes perfect: A systematic review of the  
35 expertise development of pharmacist and nurse independent prescribers in the  
36 United Kingdom. *Res Social Adm Pharm* 2018;14(1):6-17. doi:  
37 10.1016/j.sapharm.2017.02.002
- 38 172. Bowskill D, Timmons S, James V. How do nurse prescribers integrate prescribing in  
39 practice: case studies in primary and secondary care. *J Clin Nurs* 2013;22(13-  
40 14):2077-2086.
- 41 173. Courtenay M, Carey N, Stenner K. Non medical prescribing leads views on their role  
42 and the implementation of non medical prescribing from a multi-organisational  
43 perspective. *BMC Health Serv Res* 2011;11:1-10. doi: 10.1186/1472-6963-11-142
- 44 174. Lim RHM, Courtenay M, Fleming G. Roles of the non-medical prescribing leads within  
45 organisations across a Strategic Health Authority: perceived functions and factors  
46 supporting the role. *Int J Pharm Pract* 2013;21(2):82-91. doi: 10.1111/j.2042-  
47 7174.2012.00224.x
- 48 175. Ziegler L, Bennett M, Blenkinsopp A, et al. Non-medical prescribing in palliative care: a  
49 regional survey. *Palliat Med* 2015;29(2):177-181. doi: 10.1177/0269216314557346  
50 [published Online First: 2014/12/17]
- 51 176. Spillane D, Courtenay M, Chater A, et al. Factors influencing the prescribing behaviour  
52 of independent prescriber optometrists: a qualitative study using the Theoretical  
53 Domains Framework. *Ophthalmic Physiol Opt* 2021 doi:  
54 <https://doi.org/10.1111/opo.12782>
- 55 177. Stenner K, van Even S, Collen A. Early adopters of paramedic prescribing: a qualitative  
56 study. *Br Paramed J* 2021;6(1):30-37.
- 57  
58  
59  
60

MainDocumentV3.0\_UNFormatted\_18052022

178. CoP. Improving Patients' Access to Medicines: A Guide to Implementing Paramedic Prescribing within the NHS in the UK. Bridgewater, UK: College of Paramedics, 2018.
179. Eaton G, Wong G, Williams V, et al. Contribution of paramedics in primary and urgent care: a systematic review. *Br J Gen Pract* 2020;70(695):e421. doi: 10.3399/bjgp20X709877
180. Wagstaff B, Mistry V. The integration of paramedics into primary care. *Br J Gen Pract* 2020;70(692):123.
181. Dixon M. The developing role of the paramedic prescriber. *J Prescr Pract* 2020;2(2):98-100.
182. Regmi K, Mudyarabikwa O. A systematic review of the factors - barriers and enablers - affecting the implementation of clinical commissioning policy to reduce health inequalities in the National Health Service (NHS), UK. *Public Health* 2020;186:271-282. doi: <https://doi.org/10.1016/j.puhe.2020.07.027>
183. Marshall M, Holti R, Hartley J, et al. GP leadership in clinical commissioning groups: a qualitative multi-case study approach across England. *Br J Gen Pract* 2018;68(671):e427. doi: 10.3399/bjgp18X696197
184. Peckham S, Falconer J, Gillam S, et al. The organisation and delivery of health improvement in general practice and primary care: a scoping study. Health Services and Delivery Research Southampton (UK): NIHR Journals Library: PMID: 26131542, 2015.
185. Smith JA, Parkinson S, Harshfield A, et al. Early evidence of the development of primary care networks in England: a rapid evaluation study. Southampton: NIHR Health Services and Delivery Research Topic Report, 2020.
186. Bunce AE, Groß I, Davis JV, et al. Lessons learned about the effective operationalization of champions as an implementation strategy: results from a qualitative process evaluation of a pragmatic trial. *Implementation science : IS* 2020;15(1):87. doi: 10.1186/s13012-020-01048-1
187. Mieh EJ, Rattray NA, Flanagan ME, et al. Inside help: an integrative review of champions in healthcare-related implementation. *SAGE Open Med* 2018;6
188. Powell BJ, Thomas JW, Chinman MJ, et al. A refined compilation of implementation strategies: results from the expert recommendations for implementing change (ERIC) project. *Implementation science : IS* 2015;10(21)
189. Bryce C, Russell R, Dale J. Learning from the transfer of a fellowship programme to support primary care workforce needs in the UK: a qualitative study. *BMJ Open* 2019;9(1):e023384. doi: 10.1136/bmjopen-2018-023384
190. O'Cathain A, Croot L, Duncan E, et al. Guidance on how to develop complex interventions to improve health and healthcare. *BMJ Open* 2019;9(8):e029954. doi: 10.1136/bmjopen-2019-029954

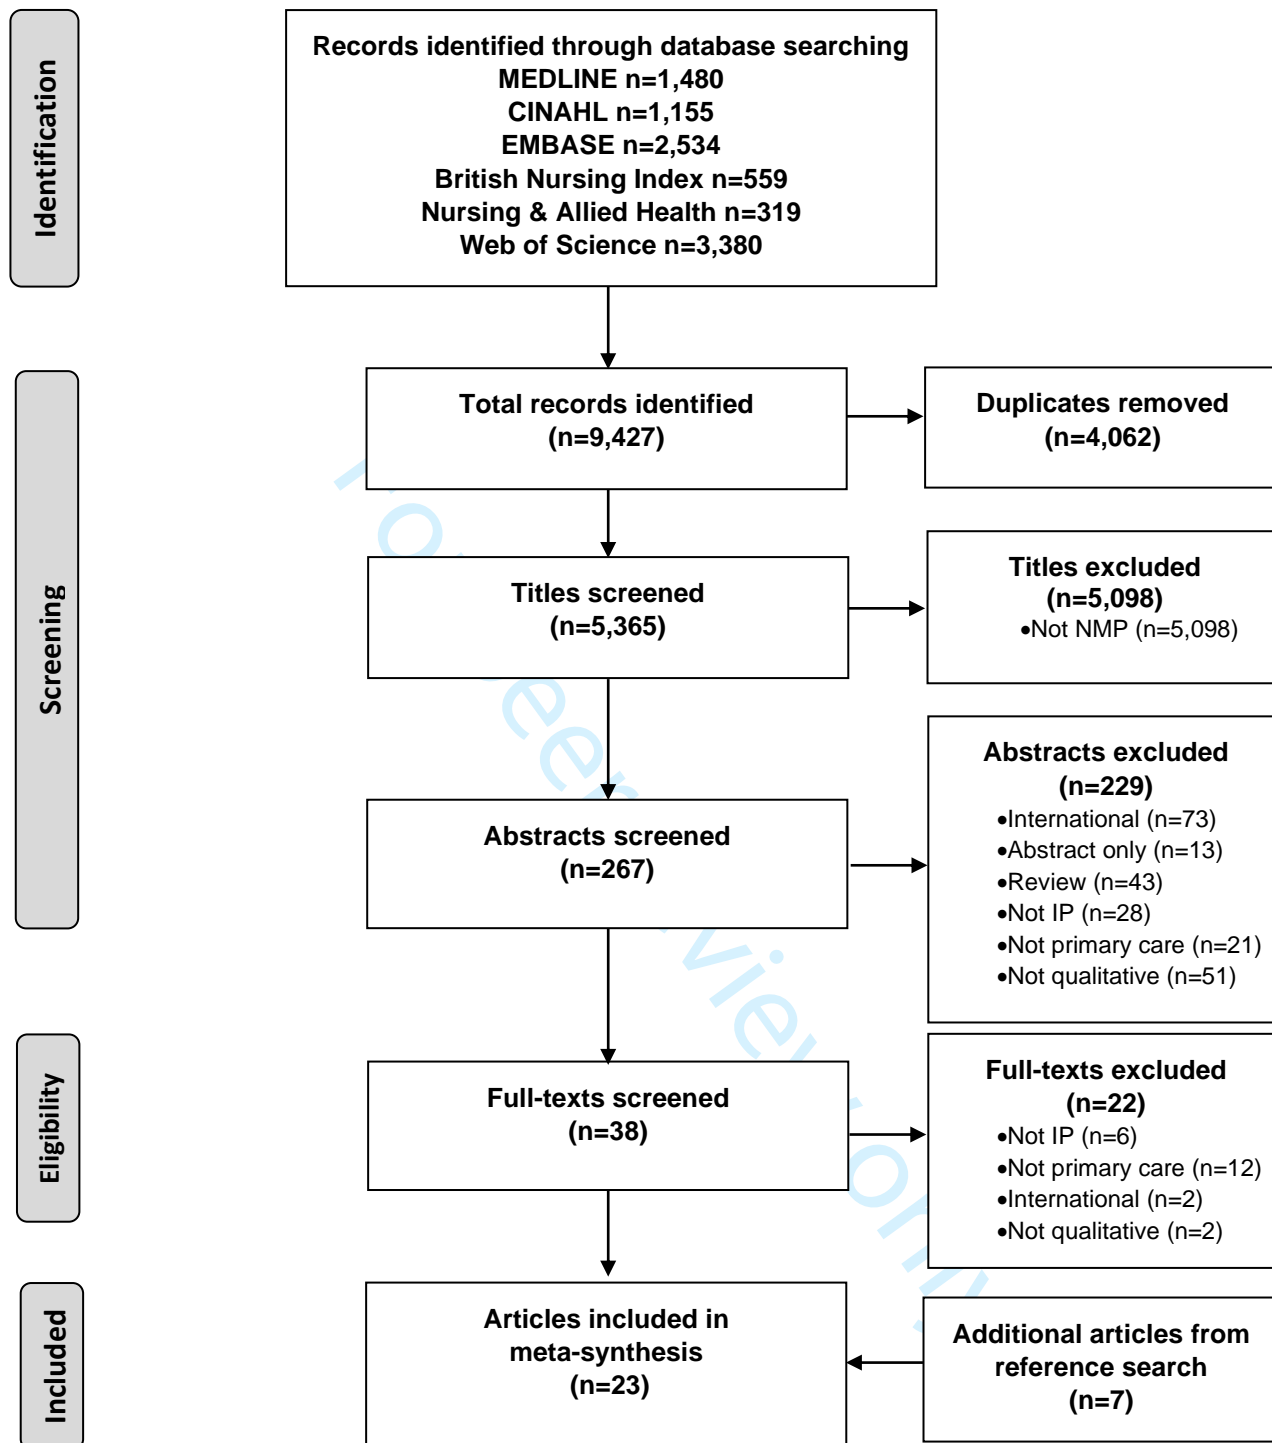

SupplementaryFile1\_V2.0\_19112021

## Supplementary File 1. MEDLINE search string

| EBSCO host; MEDLINE |                                                                                |         |
|---------------------|--------------------------------------------------------------------------------|---------|
| 1                   | (MM "Family Practice")                                                         | 42,149  |
| 2                   | (MM "Primary Health Care")                                                     | 52,315  |
| 3                   | (MM "Physicians, Family")                                                      | 11,183  |
| 4                   | (MH "Community Health Nursing")                                                | 19,640  |
| 5                   | (MH "Community Health Workers")                                                | 5,502   |
| 6                   | (MH "Community Health Services")                                               | 32,035  |
| 7                   | (MH "Community Health Centres")                                                | 34,071  |
| 8                   | TI (community N1 health) OR AB (community N1 health)                           | 41,477  |
| 9                   | TI (community N1 care) OR AB (community N1 care)                               | 13,601  |
| 10                  | TI (primary N1 health) OR AB (primary N1 health)                               | 28,349  |
| 11                  | TI (primary N1 care) OR AB (primary N1 care)                                   | 138,944 |
| 12                  | TI (general N1 practice*) OR AB (general N1 practice*)                         | 45,549  |
| 13                  | TI (general N1 practitioner*) OR AB (general N1 practitioner*)                 | 53,594  |
| 14                  | TI (family N1 practice*) OR AB (family N1 practice*)                           | 10,921  |
| 15                  | TI (family N1 practitioner*) OR AB (family N1 practitioner*)                   | 2,955   |
| 16                  | TI (gp N1 practice*) OR AB (gp N1 practice*)                                   | 2,067   |
| 17                  | TI (gp N1 service*) OR AB (gp N1 service*)                                     | 433     |
| 18                  | TI (gp N1 clinic*) OR AB (gp N1 clinic*)                                       | 341     |
| 19                  | OR/1-18                                                                        | 343,938 |
| 20                  | TI prescrib* OR AB prescrib*                                                   | 153,174 |
| 21                  | TI independent prescrib* OR AB independent prescrib*                           | 508     |
| 22                  | TI non-medical prescrib* OR AB non-medical prescrib*                           | 208     |
| 23                  | OR/20-22                                                                       | 153,174 |
| 24                  | TI nurs* OR AB nurs*                                                           | 460,786 |
| 25                  | TI physiotherap* OR AB physiotherap*                                           | 26,543  |
| 26                  | TI pharmacist* OR AB pharmacist*                                               | 34,354  |
| 27                  | TI (podiatr* OR chiropod*) OR AB (podiatr* OR chiropod*)                       | 3,274   |
| 28                  | TI radiographer* OR AB radiographer*                                           | 1,746   |
| 29                  | TI (dietician* OR dietician*) OR AB (dietician* OR dietician*)                 | 7,306   |
| 30                  | TI paramedic* OR AB paramedic*                                                 | 7,958   |
| 31                  | TI optometr* OR AB optometr*                                                   | 3,584   |
| 32                  | OR/24-31                                                                       | 533,864 |
| 33                  | 23 AND 32                                                                      | 12,932  |
| 34                  | TI nurs* N1 prescrib* OR AB nurs* N1 prescrib*                                 | 1,054   |
| 35                  | TI pharmacist* N1 prescrib* OR AB pharmacist* N1 prescrib*                     | 751     |
| 36                  | TI physiotherap* N1 prescrib* OR AB physiotherap* N1 prescrib*                 | 105     |
| 37                  | TI paramedic* N1 prescrib* OR AB paramedic* N1 prescrib*                       | 4       |
| 38                  | TI podiatr* N1 prescrib* OR AB podiatr* N1 prescrib*                           | 15      |
| 39                  | TI chiropod* N1 prescrib* OR AB chiropod* N1 prescrib*                         | 2       |
| 40                  | TI dietician* N1 prescrib* OR AB dietician* N1 prescrib*                       | 18      |
| 41                  | TI dietitian* N1 prescrib* OR AB dietitian* N1 prescrib*                       | 3       |
| 42                  | TI radiograph* N1 prescrib* OR AB radiograph* N1 prescrib*                     | 61      |
| 43                  | TI optometr* N1 prescrib* OR AB optometr*N1 prescrib*                          | 14      |
| 44                  | OR/34-43                                                                       | 1,985   |
| 45                  | 33 OR 44                                                                       | 12,993  |
| 46                  | 19 AND 45                                                                      | 2,417   |
| 47                  | LIMITS Full Text, Published 20100101-20201231, Peer-reviewed, English language | 1,480   |

SupplementaryFile2\_V2.0\_19112021

## Supplementary File 2. Quality Assessment Tool for Studies with Diverse Designs scores

|                                                                                        | Afseth & Paterson 2017 | Boreham 2013 | Bowskill 2014 | Brodie 2014 | Carter 2021 | Cole & Gillett 2015 | Courtenay 2010 | Courtenay 2017 | Courtenay 2019 | Cousins & Donnell 2012 | Daughtry & Hayter 2010 | Dhalivaal 2011 | Downer & Shepherd 2010 | Herklots 2015 | Holden 2018 | Inch 2019 | Kelly 2010 | Lane 2020 | Latham & Nyatanga 2018a,b | Maddox 2016 | Stenner 2011 | Weiss 2016 | Williams 2018 |
|----------------------------------------------------------------------------------------|------------------------|--------------|---------------|-------------|-------------|---------------------|----------------|----------------|----------------|------------------------|------------------------|----------------|------------------------|---------------|-------------|-----------|------------|-----------|---------------------------|-------------|--------------|------------|---------------|
| Explicit theoretical framework                                                         | 3                      | 1            | 0             | 0           | 3           | 0                   | 1              | 0              | 3              | 1                      | 0                      | 0              | 3                      | 0             | 3           | 0         | 0          | 3         | 3                         | 0           | 0            | 0          | 3             |
| Statement of aims/ objectives in main body of report                                   | 3                      | 3            | 3             | 2           | 3           | 3                   | 2              | 3              | 3              | 2                      | 3                      | 2              | 3                      | 3             | 3           | 3         | 3          | 2         | 3                         | 2           | 3            | 3          | 3             |
| Clear description of research setting                                                  | 3                      | 3            | 3             | 2           | 3           | 2                   | 3              | 2              | 3              | 3                      | 3                      | 2              | 1                      | 2             | 2           | 3         | 2          | 3         | 3                         | 2           | 3            | 3          | 2             |
| Evidence of sample size considered in terms of analysis                                | 0                      | 0            | 0             | 0           | 1           | 0                   | 0              | 0              | 2              | 3                      | 0                      | 3              | 0                      | 1             | 3           | 3         | 1          | 1         | 2                         | 3           | 0            | 0          | 0             |
| Representative sample of target group of a reasonable size                             | 2                      | 3            | 3             | 2           | 2           | 3                   | 3              | 3              | 2              | 3                      | 1                      | 2              | 0                      | 1             | 3           | 3         | 3          | 3         | 1                         | 3           | 3            | 3          | 3             |
| Description of procedure for data collection                                           | 3                      | 3            | 3             | 2           | 3           | 1                   | 2              | 2              | 3              | 3                      | 2                      | 2              | 2                      | 2             | 3           | 1         | 1          | 3         | 3                         | 3           | 3            | 3          | 2             |
| Rationale for choice of data collection tool(s)                                        | 2                      | 2            | 0             | 0           | 2           | 0                   | 0              | 2              | 3              | 1                      | 0                      | 2              | 3                      | 0             | 2           | 0         | 0          | 3         | 3                         | 2           | 0            | 0          | 0             |
| Detailed recruitment data                                                              | 2                      | 2            | 3             | 1           | 3           | 2                   | 3              | 2              | 3              | 2                      | 2                      | 3              | 1                      | 2             | 3           | 3         | 2          | 3         | 3                         | 3           | 3            | 3          | 3             |
| Statistical assessment of reliability & validity of measurement tool(s) (Quan)         | n/a                    | 0            | 2             | n/a         | n/a         | 0                   | n/a            | 0              | n/a            | n/a                    | n/a                    | n/a            | n/a                    | n/a           | 2           | 0         | 0          | n/a       | n/a                       | n/a         | n/a          | n/a        | n/a           |
| Fit between stated research question & method of data collection (Quan)                | n/a                    | 3            | 3             | n/a         | n/a         | 1                   | n/a            | 2              | n/a            | n/a                    | n/a                    | n/a            | n/a                    | n/a           | 3           | 3         | 0          | n/a       | n/a                       | n/a         | n/a          | n/a        | n/a           |
| Fit between stated research question & format & content of data collection tool (Qual) | 1                      | 3            | 2             | 2           | 3           | 1                   | 0              | 3              | 3              | 0                      | 0                      | 2              | 0                      | 0             | 2           | 1         | 0          | 3         | 1                         | 1           | 0            | 3          | 2             |
| Fit between research question & method of analysis                                     | 3                      | 3            | 3             | 2           | 2           | 1                   | 3              | 3              | 3              | 3                      | 3                      | 0              | 3                      | 3             | 3           | 1         | 2          | 3         | 3                         | 3           | 3            | 3          | 3             |
| Good justification for analytical method selected                                      | 1                      | 2            | 0             | 1           | 2           | 0                   | 0              | 2              | 2              | 0                      | 0                      | 0              | 3                      | 2             | 2           | 0         | 0          | 2         | 3                         | 1           | 0            | 0          | 2             |
| Assessment of reliability of analytical process (Qual)                                 | 0                      | 2            | 0             | 1           | 1           | 0                   | 3              | 2              | 0              | 3                      | 0                      | 0              | 0                      | 0             | 0           | 0         | 0          | 0         | 0                         | 3           | 3            | 0          | 3             |
| Evidence of user involvement in design                                                 | 3                      | 2            | 2             | 0           | 2           | 0                   | 0              | 3              | 1              | 0                      | 0                      | 0              | 0                      | 0             | 0           | 3         | 2          | 2         | 0                         | 1           | 0            | 0          | 3             |
| Strengths & limitations critically discussed                                           | 2                      | 0            | 2             | 1           | 3           | 0                   | 1              | 3              | 3              | 1                      | 1                      | 0              | 1                      | 2             | 2           | 2         | 0          | 3         | 2                         | 3           | 2            | 1          | 3             |
| <b>Total</b>                                                                           | <b>28</b>              | <b>32</b>    | <b>29</b>     | <b>16</b>   | <b>33</b>   | <b>14</b>           | <b>21</b>      | <b>32</b>      | <b>33</b>      | <b>25</b>              | <b>15</b>              | <b>18</b>      | <b>20</b>              | <b>18</b>     | <b>36</b>   | <b>26</b> | <b>16</b>  | <b>33</b> | <b>30</b>                 | <b>30</b>   | <b>23</b>    | <b>22</b>  | <b>32</b>     |
| <b>Max score possible</b>                                                              | <b>42</b>              | <b>48</b>    | <b>48</b>     | <b>42</b>   | <b>42</b>   | <b>48</b>           | <b>42</b>      | <b>48</b>      | <b>42</b>      | <b>42</b>              | <b>42</b>              | <b>42</b>      | <b>42</b>              | <b>42</b>     | <b>48</b>   | <b>48</b> | <b>48</b>  | <b>42</b> | <b>42</b>                 | <b>42</b>   | <b>42</b>    | <b>42</b>  | <b>42</b>     |

Supplementary File 3 – Analytical themes and sub-themes showing link of indicative quotations to barriers and facilitators

| Analytical Theme                                                              | Descriptive Theme                                                 | Data theme                              | Indicative quotations                                                                                                                                                                                                                                                                                                                                                                                                                                                                                                                                                                                                                                                                                                                                                                                                                                         | Barriers/facilitators                                                                                                                                                                                                                                                                                                                      |
|-------------------------------------------------------------------------------|-------------------------------------------------------------------|-----------------------------------------|---------------------------------------------------------------------------------------------------------------------------------------------------------------------------------------------------------------------------------------------------------------------------------------------------------------------------------------------------------------------------------------------------------------------------------------------------------------------------------------------------------------------------------------------------------------------------------------------------------------------------------------------------------------------------------------------------------------------------------------------------------------------------------------------------------------------------------------------------------------|--------------------------------------------------------------------------------------------------------------------------------------------------------------------------------------------------------------------------------------------------------------------------------------------------------------------------------------------|
| Analytical theme 1: Preparation – organisational readiness for implementation | Theme 1.1: Clarifying need & advantage of independent prescribing | Clarifying clinical/service need for IP | <ul style="list-style-type: none"> <li>•“You’re not waiting for medics to .. do your prescribing, you can do it as an autonomous practitioner ...the most crucial aspect of it—continuity of care.”<sup>(1)</sup></li> <li>•“I’m not sure that the qualification would improve my level of patient care [Doctors] sign scripts as required.”<sup>(2)</sup></li> </ul>                                                                                                                                                                                                                                                                                                                                                                                                                                                                                         | F - Clinical/service advantage of IP.<br>B - Lack of clinical/service advantage of IP.                                                                                                                                                                                                                                                     |
|                                                                               |                                                                   | Establishing service pathway gaps       | <ul style="list-style-type: none"> <li>•“Because I have to write, send it to the GP, it has to land on the GP’s desk, then the patient has gotta make an appointment to see that GP, then the prescription comes from the GP, and then they go and fulfil that prescription, and then make an appointment to come back and see me.”<sup>(3)</sup></li> <li>•“I feel reasonably comfortable that we can manage them ..by directing them to the pharmacist or the GP. I don’t feel that it’s particularly hampering my treatment...”<sup>(3)</sup></li> <li>•” “A viable (pharmacist) IP service would depend on successfully addressing the many points in the circuit of prescribing where it can go wrong.”<sup>(4)</sup></li> </ul>                                                                                                                         | F- Identified service pathway gaps.<br>B - Expedient medicines pathways                                                                                                                                                                                                                                                                    |
|                                                                               |                                                                   | Role clarity                            | <ul style="list-style-type: none"> <li>•“When I start working in a practice, I tend to try and agree ground rules, or, rules of engagement....about what it is they want me to do, and if they’re fairly broad, then that’s okay, in some cases they’re fairly narrow..”<sup>(5)</sup></li> <li>•” So basically our p-formulary [personal formulary] has to match up with what we’re doing, and .. that’s when you say, ‘actually no, I’m not prescribing tramadol ‘or I am not prescribing whatever they’re asking for.”<sup>(5)</sup></li> <li>•“I don’t think all our colleagues are clear about non-medical prescribing.”<sup>(6)</sup></li> <li>•“I think as soon as they (reception staff) realize you can prescribe they expect you to be able to do exactly what doctors can do. They don’t understand your limitations....”<sup>(7)</sup></li> </ul> | F- IP role clarity<br>F- Team understanding of IP<br>B - Lack of IP role clarity<br>B - Lack of team understanding of IP                                                                                                                                                                                                                   |
|                                                                               | Theme 1.2: Managerial leadership and support                      | Role of managers                        | <ul style="list-style-type: none"> <li>•“I phoned up for advice...but she (manager) really didn’t know... Anything I knew, I knew myself.”<sup>(8)</sup></li> <li>•“I’ve had nothing but support. They created a consulting room for me, put all the systems in place, the diagnostics, even putting notices in the notice-board for the first year or two so the patients were aware. And the staff were all made aware of it, we have practice meetings, the practice nurse was consulted.”<sup>(9)</sup></li> <li>•“I know I wouldn’t get the support from work for their funding...I would do it, but it’s funding”<sup>(3)</sup></li> <li>•” “I was challenged the other day ... to ask why I hadn’t written end of life charts ...and I wouldn’t do it because I did not have enough medical information about that patient.”<sup>(10)</sup></li> </ul> | F – Medical/managerial support/leadership.<br>F - Stakeholder consultation<br>F - Clinical record/IT access<br>B - Lack of medical/managerial support/leadership.<br>B – Lack of course funding.<br>B - Lack of clinical record/IT access                                                                                                  |
|                                                                               |                                                                   |                                         | Recognising value                                                                                                                                                                                                                                                                                                                                                                                                                                                                                                                                                                                                                                                                                                                                                                                                                                             | <ul style="list-style-type: none"> <li>•“We probably weren’t prepared to remunerate her [nurse prescriber] as much as she thought she should be, because partly in our eyes she wasn’t going to be doing that much extra.”<sup>(9)</sup></li> <li>•“It’s just like having another partner who can deal with certain conditions,</li> </ul> |

## SupplementaryFile3\_V2.0\_19112021

| Analytical Theme                                                                             | Descriptive Theme                            | Data theme                       | Indicative quotations                                                                                                                                                                                                                                                                                                                                                                                                                                                                                                                                                                                                                                                                                            | Barriers/facilitators                                                                                                                |
|----------------------------------------------------------------------------------------------|----------------------------------------------|----------------------------------|------------------------------------------------------------------------------------------------------------------------------------------------------------------------------------------------------------------------------------------------------------------------------------------------------------------------------------------------------------------------------------------------------------------------------------------------------------------------------------------------------------------------------------------------------------------------------------------------------------------------------------------------------------------------------------------------------------------|--------------------------------------------------------------------------------------------------------------------------------------|
|                                                                                              |                                              |                                  | <i>and who also works as a nurse within the practice.</i> <sup>(9)</sup>                                                                                                                                                                                                                                                                                                                                                                                                                                                                                                                                                                                                                                         | B - Lack Medical/managerial support/leadership.                                                                                      |
|                                                                                              |                                              | Culture                          | <ul style="list-style-type: none"> <li>• "I can't imagine how anyone can do our jobs without being a prescriber now ... it has given me another layer of knowledge and, the other side of it is, if you're advising people, you should have that knowledge."<sup>(1)</sup></li> <li>• "... I mean if you want to be a doctor, be a doctor, if you want to be a nurse, be a nurse, but if you're a nurse you can't do nice bits of doctoring that you feel...."<sup>(9)</sup></li> <li>• "In some surgeries generally the nursing team can feel a bit threatened by having pharmacist prescribers, .... It's about identifying our different areas of expertise and.. working together."<sup>(9)</sup></li> </ul> | F - Prescribing integral to advanced practice.<br>B - Prescribing considered outside professional practice scope                     |
|                                                                                              | Theme 1.3: Inter-professional environment    | Inter-professional relationships | <ul style="list-style-type: none"> <li>• "... they've got a good skill mix, so everyone's got their slightly different areas of expertise..." So quite often the doctors will still ring me and say – or pop in and say – what do you recommend for this, what are we supposed to be prescribing for this?<sup>(9)</sup></li> <li>• "...the engagement from Doctor... as the sort of the overall lead GP for that care home, was very disappointing".<sup>(11)</sup></li> <li>• "It was building that trust that you could do it, and you...were competent...you observed safety aspects."<sup>(12)</sup></li> </ul>                                                                                             | F - Established physician relationships.<br>F - Good inter-professional relationships<br>B - Poor/absent physician relationships     |
|                                                                                              |                                              | Communication & collaboration    | <ul style="list-style-type: none"> <li>• "We have regular clinical meetings as a practice – myself, the GPs and the nurse. And then we also have multidisciplinary meetings every 6–8 weeks."<sup>(9)</sup></li> <li>• "I don't really feel they'd (GPs) listen to me...they'd be like, well, we're GPs, we're the partners here, we make the decisions and that's final really. I do feel it's a fait accompli here...this is the way this place has been run for a long, long time."<sup>(9)</sup></li> </ul>                                                                                                                                                                                                  | F - Inter-professional collaboration/communication networks.<br>B - Lack of inter-professional collaboration/communication networks. |
| Analytical theme 2: Training – optimising practitioner readiness for independent prescribing | Theme 2.1: Selecting the right practitioners | Selection                        | <ul style="list-style-type: none"> <li>• "I presume I need to do a minor illness course first, which my GP has not agreed to for last three years."<sup>(2)</sup></li> <li>• "I wanted to do the nurse prescribing course for two years .. my employing GPs will not support me, even though all my work is in extended or advanced role."<sup>(2)</sup></li> </ul>                                                                                                                                                                                                                                                                                                                                              | B - Inconsistent selection policies<br>B - Lack of workforce planning.                                                               |
|                                                                                              |                                              | Skills & aptitudes               | <ul style="list-style-type: none"> <li>• "You have to be competent, not only with your history taking... but examination skills; you have to be able to relate those findings... to the patient in a language that they can understand."<sup>(13)</sup></li> <li>• "I think that is very important that they don't skimp. When I come in she'll take my weight, do my feet, do my blood pressure, want to know when I last had my eyes checked. .. I have all the blood tests done, and we go through those, what's wrong, what's right."<sup>(14)</sup></li> <li>• "I would definitely come back to see the nurse prescriber again; I don't</li> </ul>                                                          | F - Practitioner specialist skills<br>F - Service user acceptance of IP.<br>B - Lack of practitioner specialist skills.              |



SupplementaryFile3\_V2.0\_19112021

| Analytical Theme                                                    | Descriptive Theme                                                 | Data theme                                                                                                                                                                                                                                                                                                                                                                                                                                                                                     | Indicative quotations                                                                                                                                                                                                                                                                                                                                                                                                                                                                                                                                                                                                                                                                                                                                                 | Barriers/facilitators                                                                                                                                   |
|---------------------------------------------------------------------|-------------------------------------------------------------------|------------------------------------------------------------------------------------------------------------------------------------------------------------------------------------------------------------------------------------------------------------------------------------------------------------------------------------------------------------------------------------------------------------------------------------------------------------------------------------------------|-----------------------------------------------------------------------------------------------------------------------------------------------------------------------------------------------------------------------------------------------------------------------------------------------------------------------------------------------------------------------------------------------------------------------------------------------------------------------------------------------------------------------------------------------------------------------------------------------------------------------------------------------------------------------------------------------------------------------------------------------------------------------|---------------------------------------------------------------------------------------------------------------------------------------------------------|
|                                                                     |                                                                   |                                                                                                                                                                                                                                                                                                                                                                                                                                                                                                | <i>see that there's any difference really between seeing the doctor or the nurse prescriber. The nurse prescriber seems to have just as much knowledge as the doctor...</i> <sup>(15)</sup>                                                                                                                                                                                                                                                                                                                                                                                                                                                                                                                                                                           |                                                                                                                                                         |
|                                                                     |                                                                   | Motivation & commitment                                                                                                                                                                                                                                                                                                                                                                                                                                                                        | <ul style="list-style-type: none"> <li>•<i>"I don't think we get paid enough to make those decisions."</i><sup>(3)</sup></li> <li>•<i>"I have undertaken a large amount of further training ..with very little financial remuneration.. in my leisure time, to the exclusion of leisure activities. Eventually, one would hope for some incentive beyond job satisfaction."</i><sup>(2)</sup></li> <li>•<i>"The patients are aware of your skills and they know you're making decisions and prescribing for them. It gives you a sense of satisfaction."</i><sup>(6)</sup></li> <li>•<i>"For me prescribing right does carry a lot of accountability and responsibility and .. I'm not sure that's something I'd want to take on board."</i><sup>(3)</sup></li> </ul> | F - Professional/personal adoption incentive<br>B - Lack of professional/personal adoption incentive<br>B - Fear of responsibility/accountability/error |
|                                                                     | Theme 2.2: Preparing and supporting practitioners during training | Expectations of training                                                                                                                                                                                                                                                                                                                                                                                                                                                                       | <ul style="list-style-type: none"> <li>•<i>"Reassurance that I could do [the course] with present qualifications or what I need to do to obtain these before I do the prescriber's course."</i><sup>(2)</sup></li> <li>•<i>"Nurses that have done course say [very] intense and difficult."</i><sup>(2)</sup></li> <li>•<i>"Need info about what it involves, assessment, funding etc. Also general career advice."</i><sup>(2)</sup></li> </ul>                                                                                                                                                                                                                                                                                                                      | B - Lack of course information.                                                                                                                         |
| Study leave                                                         |                                                                   | <ul style="list-style-type: none"> <li>•<i>"As much as I would like but there be no-one doing my work while I am away...have to catch up."</i><sup>(16)</sup></li> <li>•<i>"I plan to do asthma training and then like to do minor illness training, but when I do I will have to do most of it in my own time – this puts me off nurse prescribing."</i><sup>(2)</sup></li> </ul>                                                                                                             | B - Lack of backfill/protected/study time                                                                                                                                                                                                                                                                                                                                                                                                                                                                                                                                                                                                                                                                                                                             |                                                                                                                                                         |
| Designated Medical Practitioners                                    |                                                                   | <ul style="list-style-type: none"> <li>•<i>"I think when we did our prescribing training ... some of us had a lot of very .. proactive support from the medical mentors and some of us had less than that."</i><sup>(10)</sup></li> <li>•<i>"I had to educate (DMP).. on how the course works."</i><sup>(17)</sup></li> <li>•<i>"...I think the two of us were kind of floundering a bit ... we still had slightly differing ideas as to what competency meant."</i><sup>(17)</sup></li> </ul> | F - DMP role clarity/good DMP supervision.<br>B - Lack of DMP role clarity/supervision/availability.                                                                                                                                                                                                                                                                                                                                                                                                                                                                                                                                                                                                                                                                  |                                                                                                                                                         |
| Analytical theme 3: Transition - ensuring early prescribing support | Theme 3.1: Transition as a point of vulnerability                 | Self-confidence                                                                                                                                                                                                                                                                                                                                                                                                                                                                                | <ul style="list-style-type: none"> <li>•<i>"When you've done the course, you lose a lot of confidence, because you learn a lot more about, you know the dilemmas and the ethics of prescribing... so, then, it's actually harder to prescribe (it) independently."</i><sup>(5)</sup></li> <li>•<i>"In some ways, it's like motherhood I think, you feel adequately prepared and then it happens and I think oh my goodness, this is bigger than I thought..."</i><sup>(1)</sup></li> <li>•<i>"I think they [doctors] sort of assume sometimes that we know more than we do, and I think they assume we have huge confidence in our skills when we don't..."</i><sup>(12)</sup></li> </ul>                                                                             | F - Prescribing confidence/competence.<br>B - Lack of prescribing confidence/competence.                                                                |
|                                                                     | Theme 3.2: Nurturing confidence                                   | Minimum competence                                                                                                                                                                                                                                                                                                                                                                                                                                                                             | <ul style="list-style-type: none"> <li>•<i>"I have quite a limited range that I feel confident doing, using and I haven't gone outside it..."</i><sup>(12)</sup></li> <li>•<i>"I think you have got to realize your limitations and put a stop on it when you feel your skills aren't adequate."</i><sup>(7)</sup></li> </ul>                                                                                                                                                                                                                                                                                                                                                                                                                                         | F - Delineated scope of prescribing competence<br>F - Clinical/professional protocols/guidelines.                                                       |

## SupplementaryFile3\_V2.0\_19112021

| Analytical Theme                                                                    | Descriptive Theme                         | Data theme                        | Indicative quotations                                                                                                                                                                                                                                                                                                                                                                                                                                                                                                                                                                                                                                                                                                                                                                                                                                                                           | Barriers/facilitators                                                                                                                  |
|-------------------------------------------------------------------------------------|-------------------------------------------|-----------------------------------|-------------------------------------------------------------------------------------------------------------------------------------------------------------------------------------------------------------------------------------------------------------------------------------------------------------------------------------------------------------------------------------------------------------------------------------------------------------------------------------------------------------------------------------------------------------------------------------------------------------------------------------------------------------------------------------------------------------------------------------------------------------------------------------------------------------------------------------------------------------------------------------------------|----------------------------------------------------------------------------------------------------------------------------------------|
|                                                                                     | and competence                            |                                   | <ul style="list-style-type: none"> <li>• "I do know where my competencies are and where my weaknesses are, and I don't sort of go beyond my scope of practice."<sup>(9)</sup></li> <li>• "I suppose virtually everything that I see and talk about is influenced by NICE in the first instance, and the relevant NICE guidance, whatever it might be."<sup>(18)</sup></li> <li>• "I'm happy with exacerbations and chest infections, so, like UTIs [urinary tract infections] and wound infections, but anything that's going beyond that I just don't feel confident in myself to be going out and doing that."<sup>(12)</sup></li> </ul>                                                                                                                                                                                                                                                      | F - Adequate formulary<br>B - Inappropriate patient/team pressure for prescribing<br>B – Unclear/absent clinical protocols/ guidelines |
|                                                                                     |                                           | Experience & exposure             | <ul style="list-style-type: none"> <li>• "The first time I had to ask the GP if I was actually on the right lines.. It's not as difficult the second and the third and the fourth time."<sup>(8)</sup></li> <li>• "It's like learning to drive and then the first time you actually go out without someone sat by you ..."<sup>(1)</sup></li> <li>• "Most of my colleagues have stuck with their original prescribing competence. I reacted to questions that were being asked – could you do X? So I thought, well, could I do X? And I've then made myself competent in that particular area."<sup>(9)</sup></li> <li>• "...as I've become more experienced. . . I'm more aware now, I suppose, of the – the complexities of certain patients."<sup>(19)</sup></li> </ul>                                                                                                                     | F - Exposure to prescribing opportunity<br>B - Delayed registration post qualification                                                 |
|                                                                                     | Theme 3.3: Transition support needs       | Informal & formal support systems | <ul style="list-style-type: none"> <li>• "I suppose the bottom line is I don't get any formal support. I mean, I get support in an informal way from GPs and the consultant and my colleagues."<sup>(12)</sup></li> <li>• "There are times when .. it's slightly more complex, so .. I'll go and get some advice.. I think it's really important to function in this way."<sup>(9)</sup></li> <li>• "If I am in any whatsoever doubt then I just buzz through to the GP (family physician)."<sup>(5)</sup></li> </ul>                                                                                                                                                                                                                                                                                                                                                                           | F – Medical supervision.<br>B – Lack of medical supervision.                                                                           |
| Analytical theme 4: Sustainment - maximising and developing independent prescribing | Theme 4.1: Service delivery               | Impact on workload                | <ul style="list-style-type: none"> <li>• "A big disadvantage is that a lot of doctors have offloaded their work on to us. Workload has increased so much and you have to go to a lot of meetings, often in your own time."<sup>(7)</sup></li> <li>• "We're really, really fortunate here. . .our appointment times, if you're booked into the nurse clinic, they're half-hour appointments, so we can really spend time providing the education and explaining why we're not giving antibiotics."<sup>(19)</sup></li> <li>• "Oh, it has changed dramatically. Workload had trebled. We see most of the minor ailments. We have taken a lot more on—the more knowledge you get the higher the workload. We do all medication reviews and all hypertension reviews."<sup>(7)</sup></li> <li>• "Non-medical prescribing consultations—the time tends to be much longer."<sup>(20)</sup></li> </ul> | F - Consultation time.<br>B - Time/workload constraints.                                                                               |
|                                                                                     | Theme 4.2: Supporting IP role development | Role/service expansion            | <ul style="list-style-type: none"> <li>• "I don't see how that (mental health NMP scope extension for benzodiazepine management) could happen with the QOF (Quality and Outcomes Framework) targets ... For (mental health) there's not a target ... so I genuinely don't think it's going to become part of the practice nurses remit."<sup>(20)</sup></li> <li>• "I'd like to put my name somewhere regularly along with the doctors..., so</li> </ul>                                                                                                                                                                                                                                                                                                                                                                                                                                        | F – Employment model.<br>F - National incentives/policy initiatives for IP<br>B – Employment model.<br>B - IP Role isolation.          |

## SupplementaryFile3\_V2.0\_19112021

| Analytical Theme | Descriptive Theme | Data theme                         | Indicative quotations                                                                                                                                                                                                                                                                                                                                                                                                                                                                                                                                                                                                                                                                                                                                                                                                                                                                                                                                                                                                                                                                                                                    | Barriers/facilitators                                                                                                                                |
|------------------|-------------------|------------------------------------|------------------------------------------------------------------------------------------------------------------------------------------------------------------------------------------------------------------------------------------------------------------------------------------------------------------------------------------------------------------------------------------------------------------------------------------------------------------------------------------------------------------------------------------------------------------------------------------------------------------------------------------------------------------------------------------------------------------------------------------------------------------------------------------------------------------------------------------------------------------------------------------------------------------------------------------------------------------------------------------------------------------------------------------------------------------------------------------------------------------------------------------|------------------------------------------------------------------------------------------------------------------------------------------------------|
|                  |                   |                                    | <p><i>I'm there...part of the surgery. But because ... I'm not employed by the surgery, other than being extra, additional help occasionally... it kind of leaves me in a bit of no-man's land.</i><sup>(9)</sup></p> <ul style="list-style-type: none"> <li>•<i>"It's altered my role quite in depth ... We see anything from an ingrown toenail to somebody with chest pain. In the afternoon we work on an appointment basis, running chronic disease .. and weight management clinics."</i><sup>(7)</sup></li> <li>•<i>"I found myself being given referrals for much more complex problems than perhaps I had been given before. I found myself in the position where GPs were actually expecting me to initiate treatment or to suggest what treatment they might give."</i><sup>(8)</sup></li> <li>•<i>"I have learnt over the years... extending my scope of practice as I felt more confident, and then went and sort of commissioned training or shadowed somebody, just so that I can improve my competencies and take on more of the long-term conditions and manage them in general practice."</i><sup>(9)</sup></li> </ul> | <p>B – Lack of national incentives/policy initiatives for IP<br/>B - Lack of local policies for IP</p>                                               |
|                  |                   | Continued professional development | <ul style="list-style-type: none"> <li>•<i>"Expanding your prescribing may be difficult, not because of your knowledge of the drugs, but because there's no training at a good enough level for the other stuff, .. how do you become competent to treat osteoporosis, there are no courses."</i><sup>(5)</sup></li> <li>•<i>"I don't think I have increased my scope over the years; to be frank."</i><sup>(12)</sup></li> <li>•<i>"Most of my colleagues have stuck with their original prescribing competence. I reacted to questions ... could you do X?... And I've then made myself competent..."</i><sup>(9)</sup></li> <li>•<i>"...what I would love is to sort of have a week or two a year when I was buddied up with a doctor, and he/she made me do all the prescribing. It would be terrifying but it would really make me learn."</i><sup>(12)</sup></li> <li>•<i>"We take group learning very seriously, we have clinical catch up ... where if anyone has found any new exciting evidence or guidelines or examples of good practice we do tend to talk inter-professionally."</i><sup>(18)</sup></li> </ul>             | <p>F - CPD/supervision<br/>B - Lack of CPD/supervision</p>                                                                                           |
|                  |                   | Evaluation & Reflection            | <ul style="list-style-type: none"> <li>•<i>"...it's something that's a .. priority.. for me and my team here, so we're doing a lot of work .., both in terms of auditing, so we understand how much prescribing's going on. We also are looking at appropriateness of prescribing, so auditing case notes against the local guidelines and providing feedback to prescribers...So it's high up on our agenda."</i><sup>(19)</sup></li> <li>•<i>"No. I haven't had a prescribing update. Even trying to get an update on how to use your British National Formulary, any new drugs, is difficult."</i><sup>(6)</sup></li> <li>•<i>"[W]e have a training session, like an audit with the local CCG team, in relation to our practices antibiotic prescribing and comparing it to the area in the north west... so that kind of helped influence .. my antibiotic prescribing."</i><sup>(13)</sup></li> <li>•<i>"...we don't as a group kind of get together... as clinicians and feeding</i></li> </ul>                                                                                                                                    | <p>F - Audit/feedback on prescribing practice.<br/>B - Governance/accountability structures<br/>B - Lack of governance/accountability structures</p> |

SupplementaryFile3\_V2.0\_19112021

| Analytical Theme | Descriptive Theme | Data theme | Indicative quotations                                                                                                  | Barriers/facilitators |
|------------------|-------------------|------------|------------------------------------------------------------------------------------------------------------------------|-----------------------|
|                  |                   |            | <i>back information, events that have happened ... significant events ... we don't have joint CPD.</i> <sup>(18)</sup> |                       |

CCG – clinical commissioning group, CFIR – Consolidated Framework for Implementation Research, CPD – continued professional development, DMP – designated medical practitioner, DOI – Diffusion of Innovations, IP – independent prescribing.

1. Latham K, Nyatanga B. Community palliative care clinical nurse specialists as independent prescribers: part 2. *British Journal of Community Nursing* 2018;23(3):126-133. doi: 10.12968/bjcn.2018.23.3.126
2. Kelly A, Neale J, Rollings R. Barriers to extended nurse prescribing among practice nurses. *Community Practice* 2010;83(1):21-24.
3. Holden MA, Whittle R, Waterfield J, et al. A mixed methods exploration of physiotherapist's approaches to analgesic use among patients with hip osteoarthritis. *Physiotherapy* 2019;105(3):328-337. doi: 10.1016/j.physio.2018.08.003
4. Lane K, Bond C, Wright D, et al. "Everyone needs to understand each other's systems": Stakeholder views on the acceptability and viability of a Pharmacist Independent Prescriber role in care homes for older people in the UK. *Health & Social Care in the Community* 2020;28(5):1479-1487. doi: <https://doi.org/10.1111/hsc.12970>
5. Maddox C, Halsall D, Hall J, et al. Factors influencing nurse and pharmacist willingness to take or not take responsibility for non-medical prescribing. *Research in Social and Administrative Pharmacy* 2016;12(1):41-55. doi: 10.1016/j.sapharm.2015.04.001
6. Cousins R, Donnell C. Nurse prescribing in general practice: a qualitative study of job satisfaction and work-related stress. *Family Practice* 2012;29(2):223-227. doi: 10.1093/fampra/cm077
7. Daughtry J, Hayter M. A qualitative study of practice nurses' prescribing experiences. *Practice Nursing* 2010;21(6):310-314. doi: 10.12968/pnur.2010.21.6.48329
8. Downer F, Shepherd CK. District nurses prescribing as nurse independent prescribers. *British Journal of Community Nursing* 2010;15(7):348-352.
9. Weiss MC, Platt J, Riley R, et al. GPs, nurses and pharmacists as prescribers in primary care: an exploration using the social identity approach / Hausärzte/-innen, Diplomierte Pflegefachpersonen und Apotheker/-innen als Arzneimittelverschreiber/-innen: eine Exploration mit dem Ansatz der Sozialen Identität. *International Journal of the Health Professions* 2016;3(2):153-164. doi: doi.org/10.1515/ijhp-2016-0023
10. Cole T, Gillett K. Are nurse prescribers issuing prescriptions in palliative care? *Nurse Prescribing* 2015;13(2):98-102. doi: 10.12968/npre.2015.13.2.98
11. Inch J, Notman F, Bond CM, et al. The Care Home Independent Prescribing Pharmacist Study (CHIPPS) - a non-randomised feasibility study of independent pharmacist prescribing in care homes. *Pilot and Feasibility Studies* 2019;5:89. doi: 10.1186/s40814-019-0465-y [published Online First: 2019/07/25]

SupplementaryFile3\_V2.0\_19112021

12. Herklots A, Baileff A, Latter S. Community matrons' experience as independent prescribers. *British Journal of Community Nursing* 2015;20(5):217. doi: 10.12968/bjcn.2015.20.5.217
13. Courtenay M, Rowbotham S, Lim R, et al. Examining influences on antibiotic prescribing by nurse and pharmacist prescribers: a qualitative study using the Theoretical Domains Framework and COM-B. *BMJ Open* 2019;9(6):e029177. doi: 10.1136/bmjopen-2019-029177
14. Courtenay M, Stenner K, Carey N. The views of patients with diabetes about nurse prescribing. *Diabetic Medicine* 2010;27(9):1049-1054. doi: 10.1111/j.1464-5491.2010.03051.x
15. Dhalivaal J. Patients' perspectives on prescribing by nurses in general practice. *Practice Nursing* 2011;22(1):41-46.
16. Boreham N, Coull AF, Murray ID, et al. Education programmes preparing independent prescribers in Scotland: an evaluation. *Nurse Education Today* 2013;33(4):321-326. doi: 10.1016/j.nedt.2013.01.018
17. Afseth JD, Paterson RE. The views of non-medical prescribing students and medical mentors on interprofessional competency assessment – A qualitative exploration. *Nurse Education Today* 2017;52:103-108. doi: 10.1016/j.nedt.2017.02.022
18. Carter M, Chapman S, Watson MC. Multiplicity and complexity: a qualitative exploration of influences on prescribing in UK general practice. *BMJ Open* 2021;11(1):e041460. doi: 10.1136/bmjopen-2020-041460
19. Williams SJ, Halls AV, Tonkin-Crine S, et al. General practitioner and nurse prescriber experiences of prescribing antibiotics for respiratory tract infections in UK primary care out-of-hours services (the UNITE study). *Journal of Antimicrobial Chemotherapy* 2018;73(3):795-803. doi: 10.1093/jac/dkx429
20. Brodie L, Donaldson J, Watt S. Non-medical prescribers and benzodiazepines: A qualitative study. *Nurse Prescribing* 2014;12(7):353-359.

# Reporting checklist for systematic review and meta-analysis. CRD42019124400

Based on the PRISMA guidelines.

## Instructions to authors

Complete this checklist by entering the page numbers from your manuscript where readers will find each of the items listed below.

Your article may not currently address all the items on the checklist. Please modify your text to include the missing information. If you are certain that an item does not apply, please write "n/a" and provide a short explanation.

Upload your completed checklist as an extra file when you submit to a journal.

In your methods section, say that you used the PRISMA reporting guidelines, and cite them as:

Moher D, Liberati A, Tetzlaff J, Altman DG, The PRISMA Group. Preferred Reporting Items for Systematic Reviews and Meta-Analyses: The PRISMA Statement

|                     | Reporting Item                                                                                                                                                                                                                                                                                                                | Page Number |
|---------------------|-------------------------------------------------------------------------------------------------------------------------------------------------------------------------------------------------------------------------------------------------------------------------------------------------------------------------------|-------------|
| <b>Title</b>        |                                                                                                                                                                                                                                                                                                                               |             |
|                     | <a href="#">#1</a> Identify the report as a systematic review, meta-analysis, or both.                                                                                                                                                                                                                                        | 1           |
| <b>Abstract</b>     |                                                                                                                                                                                                                                                                                                                               |             |
| Structured summary  | <a href="#">#2</a> Provide a structured summary including, as applicable: background; objectives; data sources; study eligibility criteria, participants, and interventions; study appraisal and synthesis methods; results; limitations; conclusions and implications of key findings; systematic review registration number | 2           |
| <b>Introduction</b> |                                                                                                                                                                                                                                                                                                                               |             |
| Rationale           | <a href="#">#3</a> Describe the rationale for the review in the context of what is already known.                                                                                                                                                                                                                             | 4           |

|    |                                    |                     |                                                                                                                                                                                                                                 |                      |
|----|------------------------------------|---------------------|---------------------------------------------------------------------------------------------------------------------------------------------------------------------------------------------------------------------------------|----------------------|
| 1  | Objectives                         | <a href="#">#4</a>  | Provide an explicit statement of questions being addressed with reference to participants, interventions, comparisons, outcomes, and study design (PICOS).                                                                      | 5                    |
| 2  |                                    |                     |                                                                                                                                                                                                                                 |                      |
| 3  |                                    |                     |                                                                                                                                                                                                                                 |                      |
| 4  |                                    |                     |                                                                                                                                                                                                                                 |                      |
| 5  |                                    |                     |                                                                                                                                                                                                                                 |                      |
| 6  | <b>Methods</b>                     |                     |                                                                                                                                                                                                                                 |                      |
| 7  |                                    |                     |                                                                                                                                                                                                                                 |                      |
| 8  |                                    |                     |                                                                                                                                                                                                                                 |                      |
| 9  | Protocol and registration          | <a href="#">#5</a>  | Indicate if a review protocol exists, if and where it can be accessed (e.g., Web address) and, if available, provide registration information including the registration number.                                                | 5                    |
| 10 |                                    |                     |                                                                                                                                                                                                                                 |                      |
| 11 |                                    |                     |                                                                                                                                                                                                                                 |                      |
| 12 |                                    |                     |                                                                                                                                                                                                                                 |                      |
| 13 |                                    |                     |                                                                                                                                                                                                                                 |                      |
| 14 |                                    |                     |                                                                                                                                                                                                                                 |                      |
| 15 | Eligibility criteria               | <a href="#">#6</a>  | Specify study characteristics (e.g., PICOS, length of follow-up) and report characteristics (e.g., years considered, language, publication status) used as criteria for eligibility, giving rational                            | 6                    |
| 16 |                                    |                     |                                                                                                                                                                                                                                 |                      |
| 17 |                                    |                     |                                                                                                                                                                                                                                 |                      |
| 18 |                                    |                     |                                                                                                                                                                                                                                 |                      |
| 19 |                                    |                     |                                                                                                                                                                                                                                 |                      |
| 20 |                                    |                     |                                                                                                                                                                                                                                 |                      |
| 21 |                                    |                     |                                                                                                                                                                                                                                 |                      |
| 22 | Information sources                | <a href="#">#7</a>  | Describe all information sources in the search (e.g., databases with dates of coverage, contact with study authors to identify additional studies) and date last searched.                                                      | 6                    |
| 23 |                                    |                     |                                                                                                                                                                                                                                 |                      |
| 24 |                                    |                     |                                                                                                                                                                                                                                 |                      |
| 25 |                                    |                     |                                                                                                                                                                                                                                 |                      |
| 26 |                                    |                     |                                                                                                                                                                                                                                 |                      |
| 27 |                                    |                     |                                                                                                                                                                                                                                 |                      |
| 28 |                                    |                     |                                                                                                                                                                                                                                 |                      |
| 29 | Search                             | <a href="#">#8</a>  | Present full electronic search strategy for at least one database, including any limits used, such that it could be repeated.                                                                                                   | Supplementary file 1 |
| 30 |                                    |                     |                                                                                                                                                                                                                                 |                      |
| 31 |                                    |                     |                                                                                                                                                                                                                                 |                      |
| 32 |                                    |                     |                                                                                                                                                                                                                                 |                      |
| 33 |                                    |                     |                                                                                                                                                                                                                                 |                      |
| 34 | Study selection                    | <a href="#">#9</a>  | State the process for selecting studies (i.e., for screening, for determining eligibility, for inclusion in the systematic review, and, if applicable, for inclusion in the meta-analysis).                                     | 6                    |
| 35 |                                    |                     |                                                                                                                                                                                                                                 |                      |
| 36 |                                    |                     |                                                                                                                                                                                                                                 |                      |
| 37 |                                    |                     |                                                                                                                                                                                                                                 |                      |
| 38 |                                    |                     |                                                                                                                                                                                                                                 |                      |
| 39 |                                    |                     |                                                                                                                                                                                                                                 |                      |
| 40 |                                    |                     |                                                                                                                                                                                                                                 |                      |
| 41 | Data collection process            | <a href="#">#10</a> | Describe the method of data extraction from reports (e.g., piloted forms, independently by two reviewers) and any processes for obtaining and confirming data from investigators.                                               | 7                    |
| 42 |                                    |                     |                                                                                                                                                                                                                                 |                      |
| 43 |                                    |                     |                                                                                                                                                                                                                                 |                      |
| 44 |                                    |                     |                                                                                                                                                                                                                                 |                      |
| 45 |                                    |                     |                                                                                                                                                                                                                                 |                      |
| 46 |                                    |                     |                                                                                                                                                                                                                                 |                      |
| 47 |                                    |                     |                                                                                                                                                                                                                                 |                      |
| 48 | Data items                         | <a href="#">#11</a> | List and define all variables for which data were sought (e.g., PICOS, funding sources), and any assumptions and simplifications made.                                                                                          | 7                    |
| 49 |                                    |                     |                                                                                                                                                                                                                                 |                      |
| 50 |                                    |                     |                                                                                                                                                                                                                                 |                      |
| 51 |                                    |                     |                                                                                                                                                                                                                                 |                      |
| 52 |                                    |                     |                                                                                                                                                                                                                                 |                      |
| 53 | Risk of bias in individual studies | <a href="#">#12</a> | Describe methods used for assessing risk of bias in individual studies (including specification of whether this was done at the study or outcome level, or both), and how this information is to be used in any data synthesis. | N/A                  |
| 54 |                                    |                     |                                                                                                                                                                                                                                 |                      |
| 55 |                                    |                     |                                                                                                                                                                                                                                 |                      |
| 56 |                                    |                     |                                                                                                                                                                                                                                 |                      |
| 57 |                                    |                     |                                                                                                                                                                                                                                 |                      |
| 58 |                                    |                     |                                                                                                                                                                                                                                 |                      |
| 59 |                                    |                     |                                                                                                                                                                                                                                 |                      |
| 60 |                                    |                     |                                                                                                                                                                                                                                 |                      |

|    |                 |                     |                                                                         |               |
|----|-----------------|---------------------|-------------------------------------------------------------------------|---------------|
| 1  | Summary         | <a href="#">#13</a> | State the principal summary measures (e.g., risk ratio,                 | N/A           |
| 2  | measures        |                     | difference in means).                                                   |               |
| 3  |                 |                     |                                                                         |               |
| 4  | Planned         | <a href="#">#14</a> | Describe the methods of handling data and combining                     | 7             |
| 5  | methods of      |                     | results of studies, if done, including measures of                      |               |
| 6  | analysis        |                     | consistency (e.g., I <sup>2</sup> ) for each meta-analysis.             |               |
| 7  |                 |                     |                                                                         |               |
| 8  | Risk of bias    | <a href="#">#15</a> | Specify any assessment of risk of bias that may affect                  | N/A           |
| 9  | across studies  |                     | the cumulative evidence (e.g., publication bias, selective              |               |
| 10 |                 |                     | reporting within studies).                                              |               |
| 11 |                 |                     |                                                                         |               |
| 12 | Additional      | <a href="#">#16</a> | Describe methods of additional analyses (e.g.,                          | N/A           |
| 13 | analyses        |                     | sensitivity or subgroup analyses, meta-regression), if                  |               |
| 14 |                 |                     | done, indicating which were pre-specified.                              |               |
| 15 |                 |                     |                                                                         |               |
| 16 |                 |                     |                                                                         |               |
| 17 |                 |                     |                                                                         |               |
| 18 |                 |                     |                                                                         |               |
| 19 |                 |                     |                                                                         |               |
| 20 | <b>Results</b>  |                     |                                                                         |               |
| 21 |                 |                     |                                                                         |               |
| 22 | Study selection | <a href="#">#17</a> | Give numbers of studies screened, assessed for                          | 7,            |
| 23 |                 |                     | eligibility, and included in the review, with reasons for               |               |
| 24 |                 |                     | exclusions at each stage, ideally with a <a href="#">flow diagram</a> . | Figure 1      |
| 25 |                 |                     |                                                                         | PRISMA        |
| 26 |                 |                     |                                                                         |               |
| 27 |                 |                     |                                                                         |               |
| 28 |                 |                     |                                                                         |               |
| 29 | Study           | <a href="#">#18</a> | For each study, present characteristics for which data                  | 8,            |
| 30 | characteristics |                     | were extracted (e.g., study size, PICOS, follow-up                      |               |
| 31 |                 |                     | period) and provide the citation.                                       |               |
| 32 |                 |                     |                                                                         |               |
| 33 |                 |                     |                                                                         |               |
| 34 | Risk of bias    | <a href="#">#19</a> | Present data on risk of bias of each study and, if                      | N/A           |
| 35 | within studies  |                     | available, any outcome-level assessment (see Item 12).                  |               |
| 36 |                 |                     |                                                                         |               |
| 37 |                 |                     |                                                                         |               |
| 38 | Results of      | <a href="#">#20</a> | For all outcomes considered (benefits and harms),                       | N/A           |
| 39 | individual      |                     | present, for each study: (a) simple summary data for                    |               |
| 40 | studies         |                     | each intervention group and (b) effect estimates and                    |               |
| 41 |                 |                     | confidence intervals, ideally with a forest plot.                       |               |
| 42 |                 |                     |                                                                         |               |
| 43 |                 |                     |                                                                         |               |
| 44 |                 |                     |                                                                         |               |
| 45 | Synthesis of    | <a href="#">#21</a> | Present the main results of the review. If meta-analyses                | 8-25          |
| 46 | results         |                     | are done, include for each, confidence intervals and                    |               |
| 47 |                 |                     | measures of consistency.                                                |               |
| 48 |                 |                     |                                                                         |               |
| 49 |                 |                     |                                                                         |               |
| 50 | Risk of bias    | <a href="#">#22</a> | Present results of any assessment of risk of bias across                | Supplementary |
| 51 | across studies  |                     | studies (see Item 15).                                                  | file 2        |
| 52 |                 |                     |                                                                         |               |
| 53 |                 |                     |                                                                         |               |
| 54 | Additional      | <a href="#">#23</a> | Give results of additional analyses, if done (e.g.,                     | N/A           |
| 55 | analysis        |                     | sensitivity or subgroup analyses, meta-regression [see                  |               |
| 56 |                 |                     | Item 16)].                                                              |               |
| 57 |                 |                     |                                                                         |               |
| 58 |                 |                     |                                                                         |               |
| 59 |                 |                     |                                                                         |               |
| 60 |                 |                     |                                                                         |               |



## Discussion

|                     |                     |                                                                                                                                                                                       |        |
|---------------------|---------------------|---------------------------------------------------------------------------------------------------------------------------------------------------------------------------------------|--------|
| Summary of Evidence | <a href="#">#24</a> | Summarize the main findings, including the strength of evidence for each main outcome; consider their relevance to key groups (e.g., health care providers, users, and policy makers) | 17, 26 |
| Limitations         | <a href="#">#25</a> | Discuss limitations at study and outcome level (e.g., risk of bias), and at review level (e.g., incomplete retrieval of identified research, reporting bias).                         | 28     |
| Conclusions         | <a href="#">#26</a> | Provide a general interpretation of the results in the context of other evidence, and implications for future research.                                                               | 28     |
| <b>Funding</b>      |                     |                                                                                                                                                                                       |        |
| Funding             | <a href="#">#27</a> | Describe sources of funding or other support (e.g., supply of data) for the systematic review; role of funders for the systematic review.                                             | 30     |

None The PRISMA checklist is distributed under the terms of the Creative Commons Attribution License CC-BY. This checklist can be completed online using <https://www.goodreports.org/>, a tool made by the [EQUATOR Network](#) in collaboration with [Penelope.ai](#)
