# Supplementary material for: Barriers and facilitators to implementation of non-medical independent prescribing in primary care in the UK: a qualitative systematic review
Source: PubMed Central journal article supplement — BMJ Open. 2022 Jun 8;12(6):e052227. doi: 10.1136/bmjopen-2021-052227 (PMC9185484; doi:10.1136/bmjopen-2021-052227), 2022-06-08
Supplement: bmjopen-2021-052227supp001.pdf [file bmjopen-2021-052227supp001.pdf]

SupplementaryFile1\_V2.0\_19112021

**Supplementary File 1. MEDLINE search string**

| <b>EBSCO host; MEDLINE</b> |                                                                                |         |
|----------------------------|--------------------------------------------------------------------------------|---------|
| 1                          | (MM "Family Practice")                                                         | 42,149  |
| 2                          | (MM "Primary Health Care")                                                     | 52,315  |
| 3                          | (MM "Physicians, Family")                                                      | 11,183  |
| 4                          | (MH "Community Health Nursing")                                                | 19,640  |
| 5                          | (MH "Community Health Workers")                                                | 5,502   |
| 6                          | (MH "Community Health Services")                                               | 32,035  |
| 7                          | (MH "Community Health Centres")                                                | 34,071  |
| 8                          | TI (community N1 health) OR AB (community N1 health)                           | 41,477  |
| 9                          | TI (community N1 care) OR AB (community N1 care)                               | 13,601  |
| 10                         | TI (primary N1 health) OR AB (primary N1 health)                               | 28,349  |
| 11                         | TI (primary N1 care) OR AB (primary N1 care)                                   | 138,944 |
| 12                         | TI (general N1 practice*) OR AB (general N1 practice*)                         | 45,549  |
| 13                         | TI (general N1 practitioner*) OR AB (general N1 practitioner*)                 | 53,594  |
| 14                         | TI (family N1 practice*) OR AB (family N1 practice*)                           | 10,921  |
| 15                         | TI (family N1 practitioner*) OR AB (family N1 practitioner*)                   | 2,955   |
| 16                         | TI (gp N1 practice*) OR AB (gp N1 practice*)                                   | 2,067   |
| 17                         | TI (gp N1 service*) OR AB (gp N1 service*)                                     | 433     |
| 18                         | TI (gp N1 clinic*) OR AB (gp N1 clinic*)                                       | 341     |
| 19                         | OR/1-18                                                                        | 343,938 |
| 20                         | TI prescrib* OR AB prescrib*                                                   | 153,174 |
| 21                         | TI independent prescrib* OR AB independent prescrib*                           | 508     |
| 22                         | TI non-medical prescrib* OR AB non-medical prescrib*                           | 208     |
| 23                         | OR/20-22                                                                       | 153,174 |
| 24                         | TI nurs* OR AB nurs*                                                           | 460,786 |
| 25                         | TI physiotherap* OR AB physiotherap*                                           | 26,543  |
| 26                         | TI pharmacist* OR AB pharmacist*                                               | 34,354  |
| 27                         | TI (podiatr* OR chiropod*) OR AB (podiatr* OR chiropod*)                       | 3,274   |
| 28                         | TI radiographer* OR AB radiographer*                                           | 1,746   |
| 29                         | TI (dietician* OR dietician*) OR AB (dietician* OR dietician*)                 | 7,306   |
| 30                         | TI paramedic* OR AB paramedic*                                                 | 7,958   |
| 31                         | TI optometr* OR AB optometr*                                                   | 3,584   |
| 32                         | OR/24-31                                                                       | 533,864 |
| 33                         | 23 AND 32                                                                      | 12,932  |
| 34                         | TI nurs* N1 prescrib* OR AB nurs* N1 prescrib*                                 | 1,054   |
| 35                         | TI pharmacist* N1 prescrib* OR AB pharmacist* N1 prescrib*                     | 751     |
| 36                         | TI physiotherap* N1 prescrib* OR AB physiotherap* N1 prescrib*                 | 105     |
| 37                         | TI paramedic* N1 prescrib* OR AB paramedic* N1 prescrib*                       | 4       |
| 38                         | TI podiatr* N1 prescrib* OR AB podiatr* N1 prescrib*                           | 15      |
| 39                         | TI chiropod* N1 prescrib* OR AB chiropod* N1 prescrib*                         | 2       |
| 40                         | TI dietician* N1 prescrib* OR AB dietician* N1 prescrib*                       | 18      |
| 41                         | TI dietitian* N1 prescrib* OR AB dietitian* N1 prescrib*                       | 3       |
| 42                         | TI radiograph* N1 prescrib* OR AB radiograph* N1 prescrib*                     | 61      |
| 43                         | TI optometr* N1 prescrib* OR AB optometr*N1 prescrib*                          | 14      |
| 44                         | OR/34-43                                                                       | 1,985   |
| 45                         | 33 OR 44                                                                       | 12,993  |
| 46                         | 19 AND 45                                                                      | 2,417   |
| 47                         | LIMITS Full Text, Published 20100101-20201231, Peer-reviewed, English language | 1,480   |
