# Supplementary material for: Barriers and facilitators to implementation of non-medical independent prescribing in primary care in the UK: a qualitative systematic review
Source: PubMed Central journal article supplement — BMJ Open. 2022 Jun 8;12(6):e052227. doi: 10.1136/bmjopen-2021-052227 (PMC9185484; doi:10.1136/bmjopen-2021-052227), 2022-06-08
Supplement: bmjopen-2021-052227supp002.pdf [file bmjopen-2021-052227supp002.pdf]

SupplementaryFile2\_V2.0\_19112021

## Supplementary File 2. Quality Assessment Tool for Studies with Diverse Designs scores

|                                                                                        | Afseth & Paterson 2017 | Boreham 2013 | Bowskill 2014 | Brodie 2014 | Carter 2021 | Cole & Gillett 2015 | Courtenay 2010 | Courtenay 2017 | Courtenay 2019 | Cousins & Donnell 2012 | Daughtry & Hayter 2010 | Dhalivaal 2011 | Downer & Shepherd 2010 | Herklots 2015 | Holden 2018 | Inch 2019 | Kelly 2010 | Lane 2020 | Latham & Nyatanga 2018a,b | Maddox 2016 | Stenner 2011 | Weiss 2016 | Williams 2018 |
|----------------------------------------------------------------------------------------|------------------------|--------------|---------------|-------------|-------------|---------------------|----------------|----------------|----------------|------------------------|------------------------|----------------|------------------------|---------------|-------------|-----------|------------|-----------|---------------------------|-------------|--------------|------------|---------------|
| Explicit theoretical framework                                                         | 3                      | 1            | 0             | 0           | 3           | 0                   | 1              | 0              | 3              | 1                      | 0                      | 0              | 3                      | 0             | 3           | 0         | 0          | 3         | 3                         | 0           | 0            | 0          | 3             |
| Statement of aims/ objectives in main body of report                                   | 3                      | 3            | 3             | 2           | 3           | 3                   | 2              | 3              | 3              | 2                      | 3                      | 2              | 3                      | 3             | 3           | 3         | 3          | 2         | 3                         | 2           | 3            | 3          | 3             |
| Clear description of research setting                                                  | 3                      | 3            | 3             | 2           | 3           | 2                   | 3              | 2              | 3              | 3                      | 3                      | 2              | 1                      | 2             | 2           | 3         | 2          | 3         | 3                         | 2           | 3            | 3          | 2             |
| Evidence of sample size considered in terms of analysis                                | 0                      | 0            | 0             | 0           | 1           | 0                   | 0              | 0              | 2              | 3                      | 0                      | 3              | 0                      | 1             | 3           | 3         | 1          | 1         | 2                         | 3           | 0            | 0          | 0             |
| Representative sample of target group of a reasonable size                             | 2                      | 3            | 3             | 2           | 2           | 3                   | 3              | 3              | 2              | 3                      | 1                      | 2              | 0                      | 1             | 3           | 3         | 3          | 3         | 1                         | 3           | 3            | 3          | 3             |
| Description of procedure for data collection                                           | 3                      | 3            | 3             | 2           | 3           | 1                   | 2              | 2              | 3              | 3                      | 2                      | 2              | 2                      | 2             | 3           | 1         | 1          | 3         | 3                         | 3           | 3            | 3          | 2             |
| Rationale for choice of data collection tool(s)                                        | 2                      | 2            | 0             | 0           | 2           | 0                   | 0              | 2              | 3              | 1                      | 0                      | 2              | 3                      | 0             | 2           | 0         | 0          | 3         | 3                         | 2           | 0            | 0          | 0             |
| Detailed recruitment data                                                              | 2                      | 2            | 3             | 1           | 3           | 2                   | 3              | 2              | 3              | 2                      | 2                      | 3              | 1                      | 2             | 3           | 3         | 2          | 3         | 3                         | 3           | 3            | 3          | 3             |
| Statistical assessment of reliability & validity of measurement tool(s) (Quan)         | n/a                    | 0            | 2             | n/a         | n/a         | 0                   | n/a            | 0              | n/a            | n/a                    | n/a                    | n/a            | n/a                    | n/a           | 2           | 0         | 0          | n/a       | n/a                       | n/a         | n/a          | n/a        | n/a           |
| Fit between stated research question & method of data collection (Quan)                | n/a                    | 3            | 3             | n/a         | n/a         | 1                   | n/a            | 2              | n/a            | n/a                    | n/a                    | n/a            | n/a                    | n/a           | 3           | 3         | 0          | n/a       | n/a                       | n/a         | n/a          | n/a        | n/a           |
| Fit between stated research question & format & content of data collection tool (Qual) | 1                      | 3            | 2             | 2           | 3           | 1                   | 0              | 3              | 3              | 0                      | 0                      | 2              | 0                      | 0             | 2           | 1         | 0          | 3         | 1                         | 1           | 0            | 3          | 2             |
| Fit between research question & method of analysis                                     | 3                      | 3            | 3             | 2           | 2           | 1                   | 3              | 3              | 3              | 3                      | 3                      | 0              | 3                      | 3             | 3           | 1         | 2          | 3         | 3                         | 3           | 3            | 3          | 3             |
| Good justification for analytical method selected                                      | 1                      | 2            | 0             | 1           | 2           | 0                   | 0              | 2              | 2              | 0                      | 0                      | 0              | 3                      | 2             | 2           | 0         | 0          | 2         | 3                         | 1           | 0            | 0          | 2             |
| Assessment of reliability of analytical process (Qual)                                 | 0                      | 2            | 0             | 1           | 1           | 0                   | 3              | 2              | 0              | 3                      | 0                      | 0              | 0                      | 0             | 0           | 0         | 0          | 0         | 0                         | 3           | 3            | 0          | 3             |
| Evidence of user involvement in design                                                 | 3                      | 2            | 2             | 0           | 2           | 0                   | 0              | 3              | 1              | 0                      | 0                      | 0              | 0                      | 0             | 0           | 3         | 2          | 2         | 0                         | 1           | 0            | 0          | 3             |
| Strengths & limitations critically discussed                                           | 2                      | 0            | 2             | 1           | 3           | 0                   | 1              | 3              | 3              | 1                      | 1                      | 0              | 1                      | 2             | 2           | 2         | 0          | 3         | 2                         | 3           | 2            | 1          | 3             |
| <b>Total</b>                                                                           | <b>28</b>              | <b>32</b>    | <b>29</b>     | <b>16</b>   | <b>33</b>   | <b>14</b>           | <b>21</b>      | <b>32</b>      | <b>33</b>      | <b>25</b>              | <b>15</b>              | <b>18</b>      | <b>20</b>              | <b>18</b>     | <b>36</b>   | <b>26</b> | <b>16</b>  | <b>33</b> | <b>30</b>                 | <b>30</b>   | <b>23</b>    | <b>22</b>  | <b>32</b>     |
| <b>Max score possible</b>                                                              | <b>42</b>              | <b>48</b>    | <b>48</b>     | <b>42</b>   | <b>42</b>   | <b>48</b>           | <b>42</b>      | <b>48</b>      | <b>42</b>      | <b>42</b>              | <b>42</b>              | <b>42</b>      | <b>42</b>              | <b>42</b>     | <b>48</b>   | <b>48</b> | <b>48</b>  | <b>42</b> | <b>42</b>                 | <b>42</b>   | <b>42</b>    | <b>42</b>  | <b>42</b>     |
